# Supplementary material for: Catalytic enantioselective bromoamination of allylic alcohols
Source: Royal Society of Chemistry journal article supplement (doi:10.1039/c4cc05772d), 2014-01-01
Supplement: c4cc05772d1.pdf [file c4cc05772d1.pdf]

# Supporting Information

## Catalytic Enantioselective Bromoamination of Allylic Alcohols

Juan Qi,<sup>†</sup> Guo-Tao Fan,<sup>†</sup> Jie Chen, Ming-Hui Sun, Yu-Ting Dong, and Ling Zhou\*

Key Laboratory of Synthetic and Natural Functional Molecule Chemistry of Ministry of Education,  
Department of Chemistry & Materials Science, Northwest University, Xi'an 710069, People's  
Republic of China. Fax: (+86)-29-88303915. E-mail: zhoul@nwu.edu.cn

<sup>†</sup> These authors contributed equally to this work.

### Table of Contents

|                                                     |                |
|-----------------------------------------------------|----------------|
| <b>Experimental procedures and physical data</b>    | <b>S2-40</b>   |
| <b>Scheme S1</b>                                    | <b>S3</b>      |
| <b>Table S1</b>                                     | <b>S4</b>      |
| <b>Reference</b>                                    | <b>S41</b>     |
| <b><sup>1</sup>H and <sup>13</sup>C NMR spectra</b> | <b>S42-117</b> |
| <b>Figure S1,</b>                                   | <b>S118</b>    |

**General.** All reactions that required anhydrous conditions were carried by standard procedures under nitrogen atmosphere. Commercially available reagents were used as received. The solvents were dried by distillation over the appropriate drying reagents. Infrared spectra were recorded on a TENSOR 27 FT-IR spectrophotometer and reported in wave numbers ( $\text{cm}^{-1}$ ).  $^1\text{H}$  and  $^{13}\text{C}$  NMR spectra were recorded on Varian (400 MHz) spectrometer. Chemical shifts ( $\delta$ ) are reported in ppm relative to TMS ( $\delta$  0.00) for the  $^1\text{H}$  NMR and to chloroform ( $\delta$  77.0) for the  $^{13}\text{C}$  NMR measurements. High resolution mass spectra were obtained on a UltiMate 3000 spectrometer. Enantiomeric excesses were determined by HPLC analysis on Dionex UltiMate 3000 HPLC units, including the following instruments: pump, LPG-3400SD; detector, VWD-3100; column, Daicel Chiralpak IA, IB or IC. Optical rotations were recorded on a Jasco DIP-1000 polarimeter. Reactions were followed with TLC (0.254mm silica gel 60-F plates). Visualization was accomplished with UV light. Flash chromatography separations were performed on 200-300 mesh silica gel.

#### General Procedure for the Bromoamination and Silylation of Allylic Alcohols.

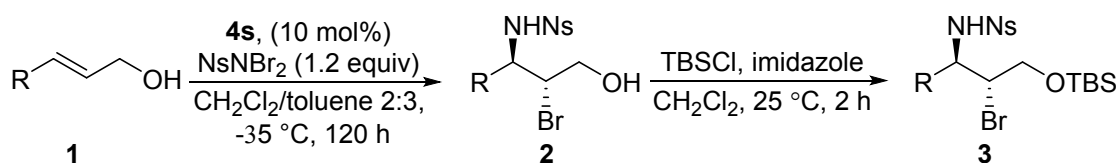

To a solution of allylic alcohol **1** (0.20 mmol, 1.00 equiv), catalyst **4s** (14.0 mg, 0.02 mmol, 0.10 equiv) in  $\text{CH}_2\text{Cl}_2/\text{toluene}$  (2:3, 5.0 mL) at  $-35\text{ }^\circ\text{C}$  in dark under  $\text{N}_2$  was added *NN*-dibromo-4-nitrobenzenesulfonamide (86.4 mg, 0.24 mmol, 1.20 equiv). The resulting mixture was stirred at  $-35\text{ }^\circ\text{C}$  for 120 h. The reaction was quenched with saturated  $\text{Na}_2\text{SO}_3$  (3.0 mL) at  $-35\text{ }^\circ\text{C}$  and then was warmed to  $25\text{ }^\circ\text{C}$ . The solution was diluted with water (3.0 mL) and extracted with  $\text{CH}_2\text{Cl}_2$  ( $3 \times 6$  mL). The combined extracts were washed with brine (10.0 mL), dried ( $\text{Na}_2\text{SO}_4$ ), filtered and concentrated *in vacuo*. The residue was purified by a short silica column to give a mixture of **2** and  $\text{NsNH}_2$ . To a solution of the mixture in  $\text{CH}_2\text{Cl}_2$  (2.0 mL) was added TBSCl (33.2 mg, 0.22 mmol) and imidazole (15.0 mg, 0.20 mmol) at  $25\text{ }^\circ\text{C}$ . The resulting mixture was stirred at  $25\text{ }^\circ\text{C}$  for 2 h, to the mixture was added brine (3 mL) and extracted with  $\text{CH}_2\text{Cl}_2$  ( $3 \times 5$  mL). The combined extracts were dried ( $\text{Na}_2\text{SO}_4$ ), filtered and concentrated *in vacuo*. The residue was purified by flash column chromatography to yield the corresponding vicinal bromoamine **3**.

### Scheme S1. Silylation of **2a**.

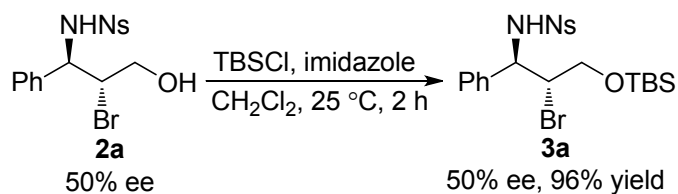

Treatment of **2a** according to the general procedure (step 2) resulted in **3a** in 96% yield without change of enantiopurity. HPLC of **2a** (Daicel Chiralpak IC, *i*-PrOH/hexane = 10/90, 1.5 mL/min, 250 nm)  $t_1 = 34.2$  min (major),  $t_2 = 38.5$  min (minor):

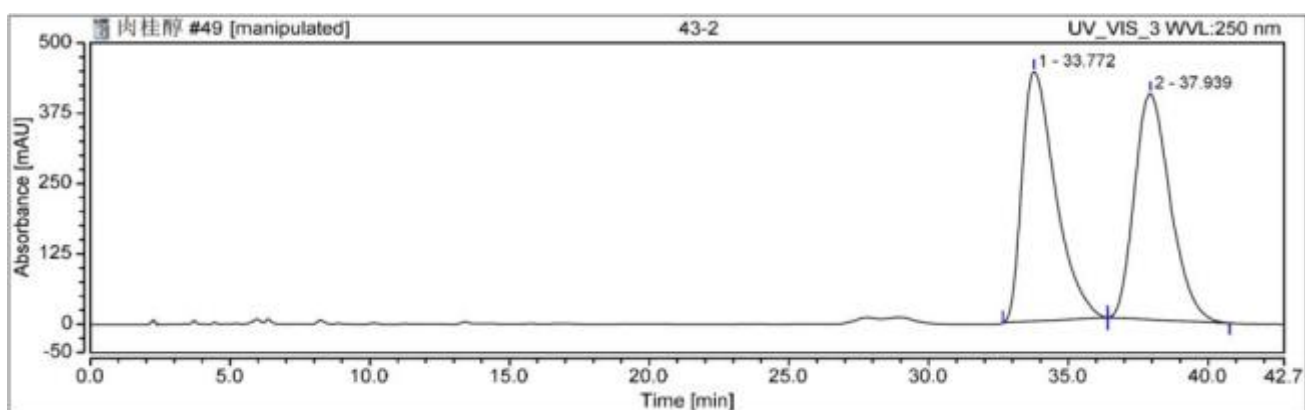

| Integration Results |           |                    |                 |                |                 |                   |             |
|---------------------|-----------|--------------------|-----------------|----------------|-----------------|-------------------|-------------|
| No.                 | Peak Name | Retention Time min | Area mAU*min    | Height mAU     | Relative Area % | Relative Height % | Amount n.a. |
| 1                   |           | 33.772             | 617.665         | 443.614        | 50.83           | 52.47             | n.a.        |
| 2                   |           | 37.939             | 597.550         | 401.822        | 49.17           | 47.53             | n.a.        |
| <b>Total:</b>       |           |                    | <b>1215.215</b> | <b>845.437</b> | <b>100.00</b>   | <b>100.00</b>     |             |

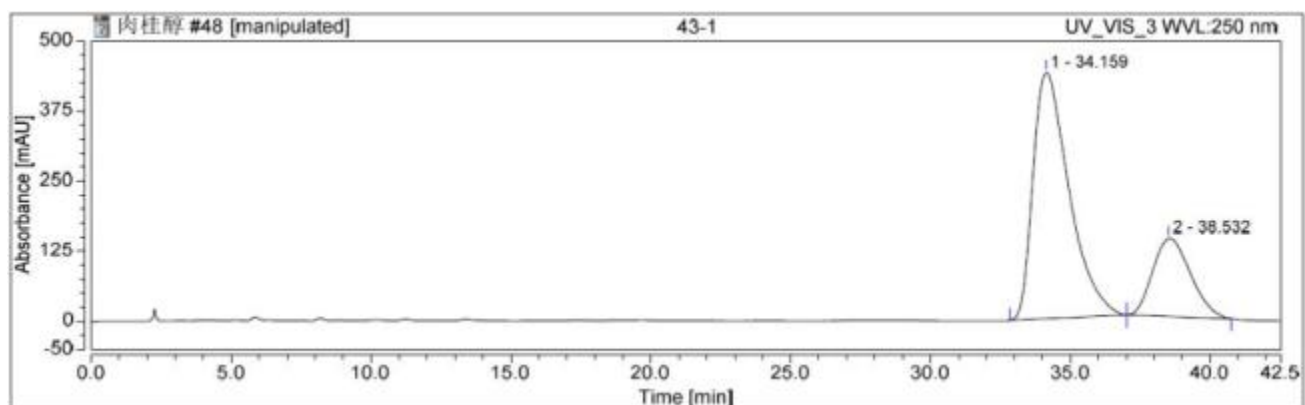

| Integration Results |           |                    |                |                |                 |                   |             |
|---------------------|-----------|--------------------|----------------|----------------|-----------------|-------------------|-------------|
| No.                 | Peak Name | Retention Time min | Area mAU*min   | Height mAU     | Relative Area % | Relative Height % | Amount n.a. |
| 1                   |           | 34.159             | 655.910        | 438.913        | 75.07           | 75.86             | n.a.        |
| 2                   |           | 38.532             | 217.808        | 139.696        | 24.93           | 24.14             | n.a.        |
| <b>Total:</b>       |           |                    | <b>873.719</b> | <b>578.609</b> | <b>100.00</b>   | <b>100.00</b>     |             |

**Table S1. Optimization of the Bromoamination of 1a.**

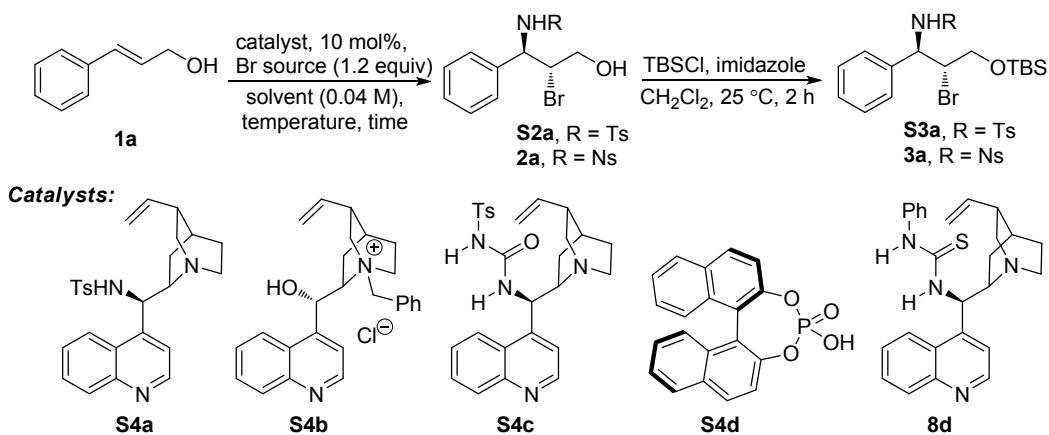

| entr | catalyst                | Br/amine source (equiv)                    | solvent                                                  | temp (°C) | time (h) | yield (%) <sup>b</sup> | ee              |
|------|-------------------------|--------------------------------------------|----------------------------------------------------------|-----------|----------|------------------------|-----------------|
| 1    | Cinchonine              | NBS (1.2)/TsNH <sub>2</sub> (1.2)          | CH <sub>2</sub> Cl <sub>2</sub>                          | rt        | 12       | trace                  | -               |
| 2    |                         | TsNBr <sub>2</sub> (1.2)                   | CH <sub>2</sub> Cl <sub>2</sub>                          | rt        | 12       | 46                     | -               |
| 3    | (DHQD) <sub>2</sub> PHA | TsNBr <sub>2</sub> (1.2)                   | CH <sub>2</sub> Cl <sub>2</sub>                          | -78       | 64       | 7                      | 5               |
| 4    | (DHQD) <sub>2</sub> Pyr | TsNBr <sub>2</sub> (1.2)                   | CH <sub>2</sub> Cl <sub>2</sub>                          | -78       | 64       | 6                      | 4               |
| 5    | (DHQD) <sub>2</sub> Pyr | NBS (1.2)/NsNH <sub>2</sub> (1.2)          | CH <sub>2</sub> Cl <sub>2</sub>                          | -78       | 80       | 8                      | 5               |
| 6    | cinchonidine            | NsNBr <sub>2</sub> (1.2)                   | CH <sub>2</sub> Cl <sub>2</sub>                          | -78       | 65       | 29                     | 4               |
| 7    | (DHQD) <sub>2</sub> Pyr | NsNBr <sub>2</sub> (1.2)                   | CH <sub>2</sub> Cl <sub>2</sub>                          | -78       | 65       | 25                     | 11              |
| 8    | (DHQ) <sub>2</sub> PHAL | NsNBr <sub>2</sub> (1.2)                   | CH <sub>2</sub> Cl <sub>2</sub>                          | -78       | 65       | 40                     | 0               |
| 9    | <b>S4a</b>              | NsNBr <sub>2</sub> (1.2)                   | CH <sub>2</sub> Cl <sub>2</sub>                          | -78       | 65       | 63                     | 0               |
| 10   | <b>S4b</b>              | NsNBr <sub>2</sub> (1.2)                   | CH <sub>2</sub> Cl <sub>2</sub>                          | -78       | 76       | 5                      | 2               |
| 11   | <b>S4c</b>              | NsNBr <sub>2</sub> (1.2)                   | CH <sub>2</sub> Cl <sub>2</sub>                          | -78       | 76       | 20                     | 0               |
| 12   | <b>S4d</b>              | NsNBr <sub>2</sub> (1.2)                   | CH <sub>2</sub> Cl <sub>2</sub>                          | -78       | 76       | 17                     | 2               |
| 13   | <b>8d</b>               | NsNBr <sub>2</sub> (1.2)                   | CH <sub>2</sub> Cl <sub>2</sub>                          | -78       | 76       | 50                     | 49              |
| 14   | <b>8d</b>               | NBS (1.2)/NsNH <sub>2</sub> (1.2)          | CH <sub>2</sub> Cl <sub>2</sub>                          | -78       | 80       | 11                     | 37              |
| 15   | <b>8d</b>               | NsNBr <sub>2</sub> (1.2)                   | CH <sub>2</sub> Cl <sub>2</sub>                          | -50       | 76       | 59                     | 47              |
| 16   | <b>4a</b>               | NsNBr <sub>2</sub> (1.2)                   | CH <sub>2</sub> Cl <sub>2</sub>                          | -50       | 42       | 44                     | 51              |
| 17   | <b>4a</b>               | TsNBr <sub>2</sub> (1.2)                   | CH <sub>2</sub> Cl <sub>2</sub>                          | -50       | 96       | 30                     | 15              |
| 18   | <b>4a</b>               | NsNBr <sub>2</sub> (0.6)/NsNH <sub>2</sub> | CH <sub>2</sub> Cl <sub>2</sub>                          | -50       | 60       | 23                     | 44              |
| 19   | <b>4a</b>               | NBP (1.2)/NsNH <sub>2</sub> (1.2)          | CH <sub>2</sub> Cl <sub>2</sub>                          | -50       | 138      | 27                     | 49              |
| 20   | <b>4a</b>               | DBDMH (1.2)/NsNH <sub>2</sub>              | CH <sub>2</sub> Cl <sub>2</sub>                          | -50       | 138      | Trace                  | -               |
| 21   | <b>4a</b>               | NsNBr <sub>2</sub> (1.2)                   | Toluene                                                  | -40       | 96       | Trace                  | -               |
| 22   | <b>4a</b>               | NsNBr <sub>2</sub> (1.2)                   | Et <sub>2</sub> O                                        | -50       | 96       | 70                     | 0               |
| 23   | <b>4a</b>               | NsNBr <sub>2</sub> (1.2)                   | CH <sub>2</sub> Cl <sub>2</sub> /toluene, 1:1            | -50       | 138      | 49                     | 57              |
| 24   | <b>4a</b>               | NsNBr <sub>2</sub> (1.2)                   | CH <sub>2</sub> Cl <sub>2</sub> /hexane, 1:1             | -50       | 96       | 71                     | 26              |
| 25   | <b>4a</b>               | NsNBr <sub>2</sub> (1.2)                   | CHCl <sub>3</sub> /ClCH <sub>2</sub> CH <sub>2</sub> Cl, | -50       | 98       | 61                     | 46              |
| 26   | <b>4a</b>               | NsNBr <sub>2</sub> (1.2)                   | CH <sub>2</sub> Cl <sub>2</sub> /toluene, 1:2            | -50       | 138      | 36                     | 41              |
| 27   | <b>4a</b>               | NsNBr <sub>2</sub> (1.2)                   | CH <sub>2</sub> Cl <sub>2</sub> /toluene, 2:1            | -50       | 138      | 37                     | 54              |
| 28   | <b>4a</b>               | NsNBr <sub>2</sub> (1.2)                   | CH <sub>2</sub> Cl <sub>2</sub> /toluene, 2:3            | -50       | 75       | 24                     | 59              |
| 29   | <b>4a</b>               | NsNBr <sub>2</sub> (1.2)                   | CH <sub>2</sub> Cl <sub>2</sub> /toluene, 2:3            | -40       | 96       | 59                     | 63              |
| 30   | <b>4a</b>               | NsNBr <sub>2</sub> (1.2)                   | CH <sub>2</sub> Cl <sub>2</sub> /toluene, 2:3            | -30       | 72       | 53                     | 47              |
| 31   | <b>4s</b>               | NsNBr <sub>2</sub> (1.2)                   | CH <sub>2</sub> Cl <sub>2</sub> /toluene, 2:3            | -40       | 96       | 67                     | 90              |
| 32   | <b>4s</b>               | NsNBr <sub>2</sub> (1.2)                   | CH <sub>2</sub> Cl <sub>2</sub> /toluene, 2:3            | -35       | 120      | 64                     | 86 <sup>c</sup> |

<sup>a</sup> Reactions were carried out with **1a** (0.20 mmol), catalyst (0.02 mmol) and bromine source (equiv), amine source (equiv) in solvent (0.04 M) in the absence of light. <sup>b</sup> Isolated yield by two steps. <sup>c</sup> The concentration is 0.1 M.

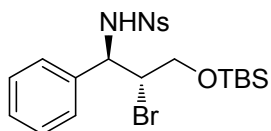

**(1*R*,2*R*)-*N*-(2-Bromo-3-((*tert*-butyldimethylsilyloxy)-1-phenylpropyl)-4-nitrobenzenesulfonamide (3a)**

White solide,  $[\alpha]_{20}^D -51.9$  ( $c$  1.0,  $\text{CHCl}_3$ , 91% ee); IR (KBr): 3297, 2928, 1606, 1348, 1310, 1012, 836  $\text{cm}^{-1}$ ;  $^1\text{H}$ NMR (400 MHz, )  $\delta$  8.15 (d,  $J = 8.5$  Hz, 2H), 7.80 (d,  $J = 8.5$  Hz, 2H), 7.18-7.21 (m, 5H), 6.68 (d,  $J = 7.2$  Hz, 1H), 4.97 (dd,  $J = 6.8, 4.0$  Hz, 1H), 4.20 (s, 1H), 3.81 (d,  $J = 11.2$  Hz, 1H), 3.52 (dd,  $J = 11.2, 5.6$  Hz, 1H), 0.98 (s, 9H), 0.11 (s, 3H), 0.10 (s, 3H);  $^{13}\text{C}$  NMR (100 MHz,  $\text{CDCl}_3$ )  $\delta$  149.6, 146.3, 136.3, 128.4, 128.4, 128.2, 127.3, 123.8, 64.2, 61.3, 54.8, 25.7, 18.1,  $-5.56, -5.61$ ; HRMS (ESI) calcd for  $\text{C}_{21}\text{H}_{29}\text{BrN}_2\text{O}_5\text{SSiNa}$   $m/z$   $[\text{M} + \text{Na}]^+$ : 551.0642, found: 551.0655; HPLC (Daicel Chiralpak IC, *i*-PrOH/hexane = 8/92, 1.0 mL/min, 250 nm)  $t_1 = 17.2$  min (major),  $t_2 = 20.3$  min (minor).

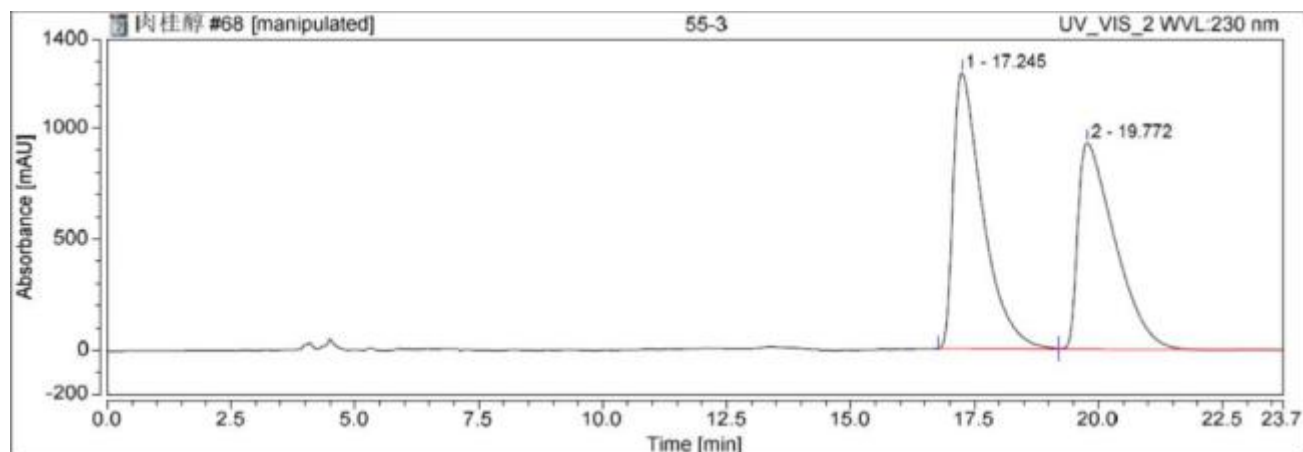

| Integration Results |           |                    |              |            |                 |                   |             |
|---------------------|-----------|--------------------|--------------|------------|-----------------|-------------------|-------------|
| No.                 | Peak Name | Retention Time min | Area mAU*min | Height mAU | Relative Area % | Relative Height % | Amount n.a. |
| 1                   |           | 17.245             | 861.976      | 1243.837   | 50.75           | 57.20             | n.a.        |
| 2                   |           | 19.772             | 803.527      | 930.809    | 49.25           | 42.80             | n.a.        |
| Total:              |           |                    | 1665.503     | 2174.646   | 100.00          | 100.00            |             |

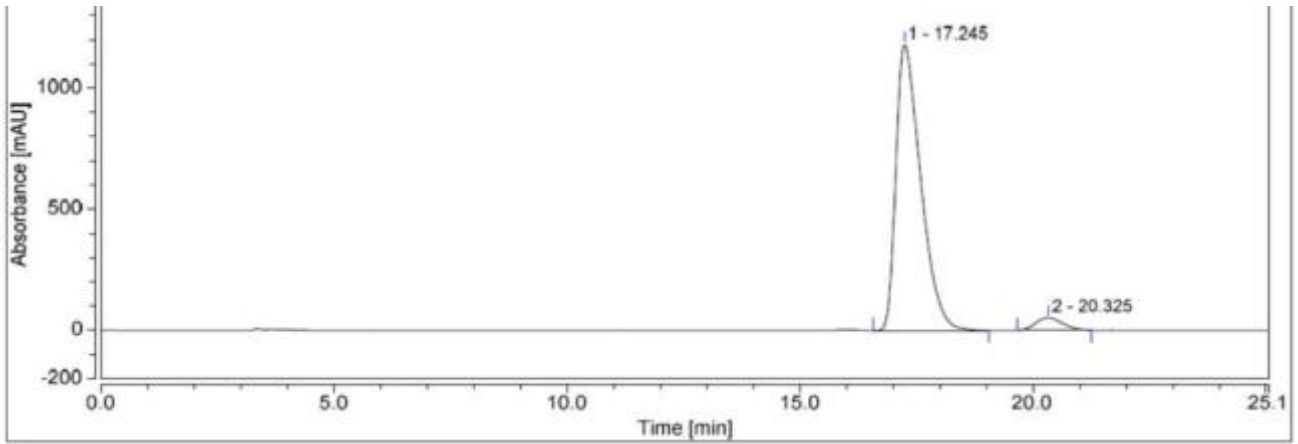

| Integration Results |           |                    |                |                 |                 |                   |             |
|---------------------|-----------|--------------------|----------------|-----------------|-----------------|-------------------|-------------|
| No.                 | Peak Name | Retention Time min | Area mAU*min   | Height mAU      | Relative Area % | Relative Height % | Amount n.a. |
| 1                   |           | 17.245             | 728.990        | 1181.208        | 95.48           | 95.79             | n.a.        |
| 2                   |           | 20.325             | 34.547         | 51.869          | 4.52            | 4.21              | n.a.        |
| <b>Total:</b>       |           |                    | <b>763.537</b> | <b>1233.077</b> | <b>100.00</b>   | <b>100.00</b>     |             |

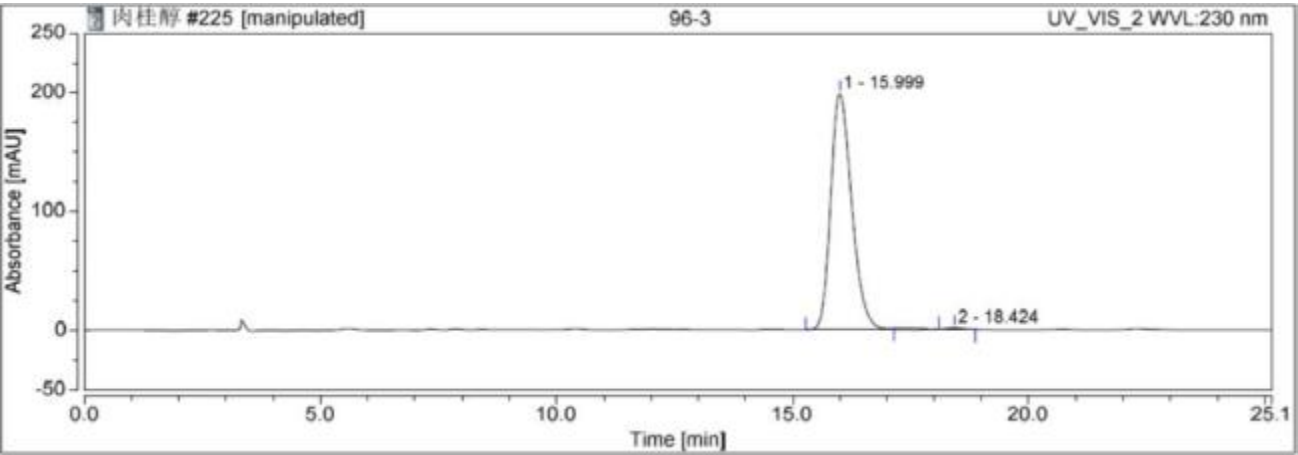

| Integration Results |           |                    |                |                |                 |                   |             |
|---------------------|-----------|--------------------|----------------|----------------|-----------------|-------------------|-------------|
| No.                 | Peak Name | Retention Time min | Area mAU*min   | Height mAU     | Relative Area % | Relative Height % | Amount n.a. |
| 1                   |           | 15.999             | 102.631        | 198.939        | 99.42           | 99.34             | n.a.        |
| 2                   |           | 18.424             | 0.598          | 1.317          | 0.58            | 0.66              | n.a.        |
| <b>Total:</b>       |           |                    | <b>103.230</b> | <b>200.257</b> | <b>100.00</b>   | <b>100.00</b>     |             |

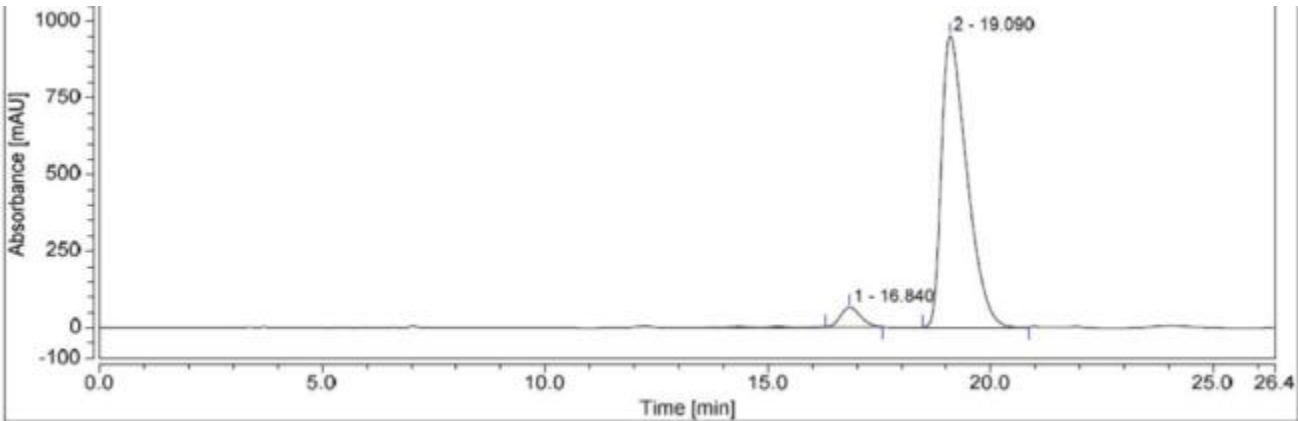

| Integration Results |           |                    |              |            |                 |                   |             |
|---------------------|-----------|--------------------|--------------|------------|-----------------|-------------------|-------------|
| No.                 | Peak Name | Retention Time min | Area mAU*min | Height mAU | Relative Area % | Relative Height % | Amount n.a. |
| 1                   |           | 16.840             | 34.311       | 65.172     | 5.17            | 6.40              | n.a.        |
| 2                   |           | 19.090             | 629.310      | 952.434    | 94.83           | 93.60             | n.a.        |
| Total:              |           |                    | 663.622      | 1017.606   | 100.00          | 100.00            |             |

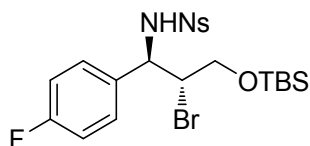

***N*-(2-Bromo-3-((*tert*-butyldimethylsilyl)oxy)-1-(4-fluorophenyl)propyl)-4-nitrobenzenesulfonamide (3b)**

White solide,  $[\alpha]_{20}^D -21.8$  ( $c$  0.45,  $\text{CHCl}_3$ , 88% ee); IR (KBr): 3130, 1607, 1401, 1167, 1092, 838,  $\text{cm}^{-1}$ ;  $^1\text{H}$ NMR (400 MHz,  $\text{CDCl}_3$ )  $\delta$  8.19 (d,  $J = 8.6$  Hz, 1H), 7.85 (d,  $J = 8.6$  Hz, 2H), 7.22-7.19 (m, 2H), 6.93-6.89 (m, 2H), 6.68 (d,  $J = 6.9$  Hz, 1H), 4.95-4.93 (m, 1H), 4.16 (s, 1H), 3.79-3.76 (m, 1H), 3.49-3.45 (m, 1H), 0.98 (s, 9H), 0.09 (s, 3H), 0.07 (s, 3H);  $^{13}\text{C}$  NMR (100 MHz,  $\text{CDCl}_3$ )  $\delta$  162.4 (d,  $J = 247.0$  Hz), 149.7, 146.1, 132.2, 129.0, 128.7 (d,  $J = 88.0$  Hz), 123.9, 115.3 (d,  $J = 21.0$  Hz), 64.0, 60.2, 54.9, 25.7, 18.0,  $-5.6$ ; HRMS (ESI) calcd for  $\text{C}_{21}\text{H}_{28}\text{BrFN}_2\text{O}_5\text{SSiNa}$   $m/z$   $[\text{M} + \text{Na}]^+$ : 569.0548, found: 569.0557, HPLC (Daicel Chiralpak IC, *i*-PrOH/hexane = 8/92, 1.0 mL/min, 230 nm)  $t_1 = 13.3$  min, (major),  $t_2 = 15.1$  min (minor).

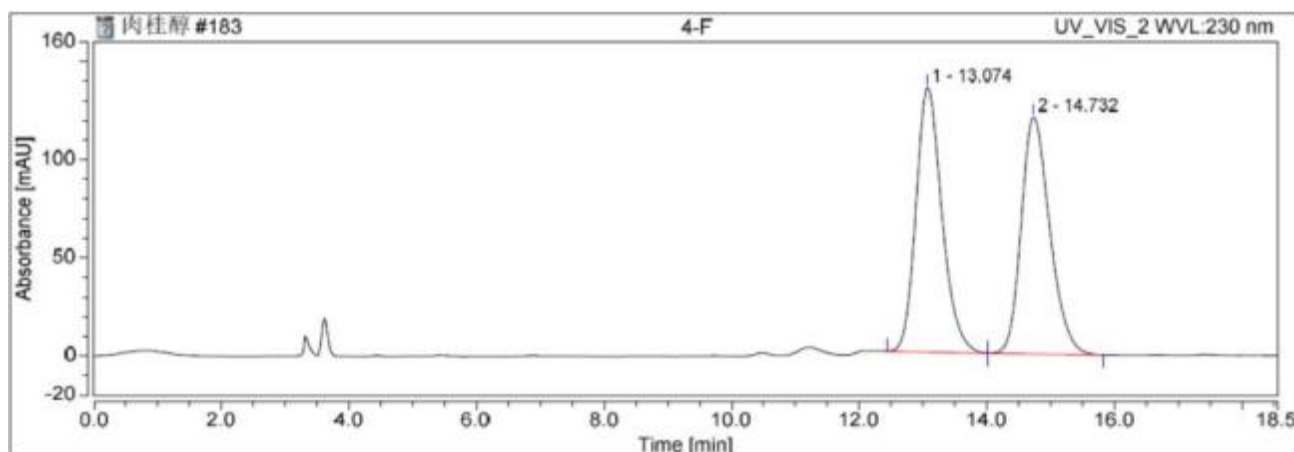

| Integration Results |           |                    |              |            |                 |                   |             |
|---------------------|-----------|--------------------|--------------|------------|-----------------|-------------------|-------------|
| No.                 | Peak Name | Retention Time min | Area mAU*min | Height mAU | Relative Area % | Relative Height % | Amount n.a. |
| 1                   |           | 13.074             | 63.596       | 134.780    | 50.42           | 52.77             | n.a.        |
| 2                   |           | 14.732             | 62.547       | 120.647    | 49.58           | 47.23             | n.a.        |
| Total:              |           |                    | 126.142      | 255.427    | 100.00          | 100.00            |             |

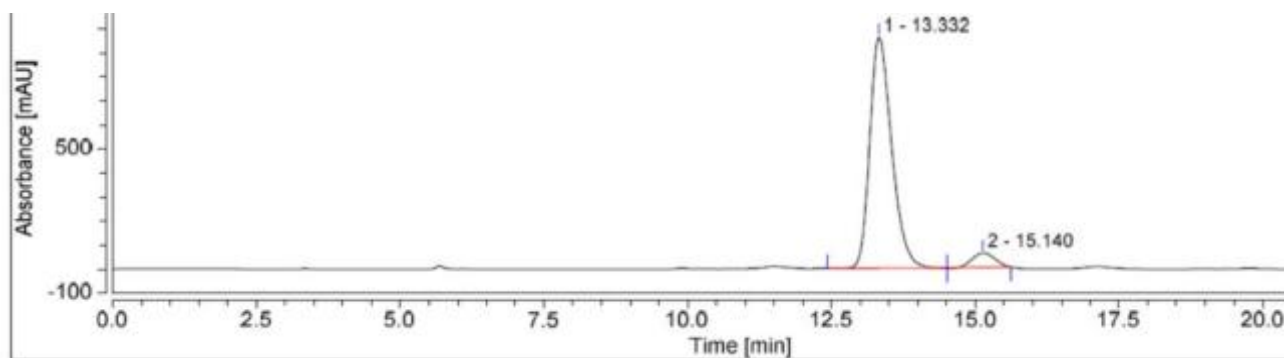

| Integration Results |           |                       |                 |               |                    |                      |                |
|---------------------|-----------|-----------------------|-----------------|---------------|--------------------|----------------------|----------------|
| No.                 | Peak Name | Retention Time<br>min | Area<br>mAU*min | Height<br>mAU | Relative Area<br>% | Relative Height<br>% | Amount<br>n.a. |
| 1                   |           | 13.332                | 424.038         | 961.309       | 93.98              | 94.07                | n.a.           |
| 2                   |           | 15.140                | 27.172          | 60.562        | 6.02               | 5.93                 | n.a.           |
| Total:              |           |                       | 451.210         | 1021.871      | 100.00             | 100.00               |                |

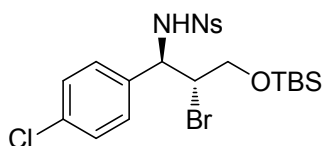

***N*-(2-Bromo-3-((*tert*-butyldimethylsilyl)oxy)propyl)-1-(4-chlorophenyl)propan-1-amine sulfonamide (**3c**)**

White solide,  $[\alpha]_{20}^D -35.0$  (*c* 2.5,  $\text{CHCl}_3$ , 93% ee), IR (KBr): 3296, 2927, 1607, 1532, 1349, 1311, 1014, 837  $\text{cm}^{-1}$ ;  $^1\text{H}$ NMR (400 MHz,  $\text{CDCl}_3$ )  $\delta$  8.21 (d,  $J = 8.2$  Hz, 2H), 7.85 (d,  $J = 8.4$  Hz, 2H), 7.2-7.18 (m, 4H), 6.63 (d,  $J = 7.2$  Hz, 1H), 4.91 (dd,  $J = 6.8, 4.0$  Hz, 1H), 4.14 (s, 1H), 3.79 (d,  $J = 11.3$  Hz, 1H), 3.50 (dd,  $J = 11.2, 6.0$  Hz, 1H), 0.97 (s, 9H), 0.10 (s, 3H), 0.09 (s, 3H).  $^{13}\text{C}$ NMR (100 MHz,  $\text{CDCl}_3$ )  $\delta$  149.8, 146.18, 135.2, 134.5, 128.7, 128.3, 124.0, 64.2, 60.7, 54.4, 25.7, 18.1, -5.5, -5.6; HRMS (ESI) calcd for  $\text{C}_{21}\text{H}_{28}\text{BrClN}_2\text{O}_5\text{SSiNa}$   $m/z$   $[\text{M} + \text{Na}]^+$ : 585.0252, found: 585.0257, HPLC (Daicel Chiralpak IC, *i*-PrOH/hexane = 8/92, 1.0 mL/min, 254 nm)  $t_1 = 12.3$  min (major),  $t_2 = 14.0$  min (minor).



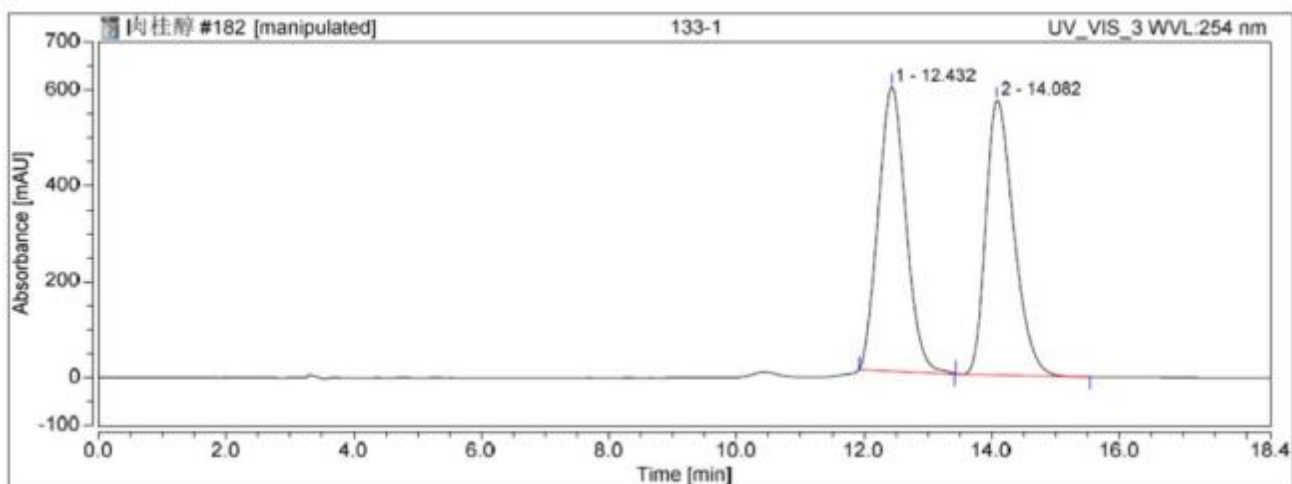

| Integration Results |           |                    |              |            |                 |                   |             |
|---------------------|-----------|--------------------|--------------|------------|-----------------|-------------------|-------------|
| No.                 | Peak Name | Retention Time min | Area mAU*min | Height mAU | Relative Area % | Relative Height % | Amount n.a. |
| 1                   |           | 12.432             | 297.214      | 593.730    | 50.46           | 50.83             | n.a.        |
| 2                   |           | 14.082             | 291.759      | 574.245    | 49.54           | 49.17             | n.a.        |
| Total:              |           |                    | 588.973      | 1167.975   | 100.00          | 100.00            |             |

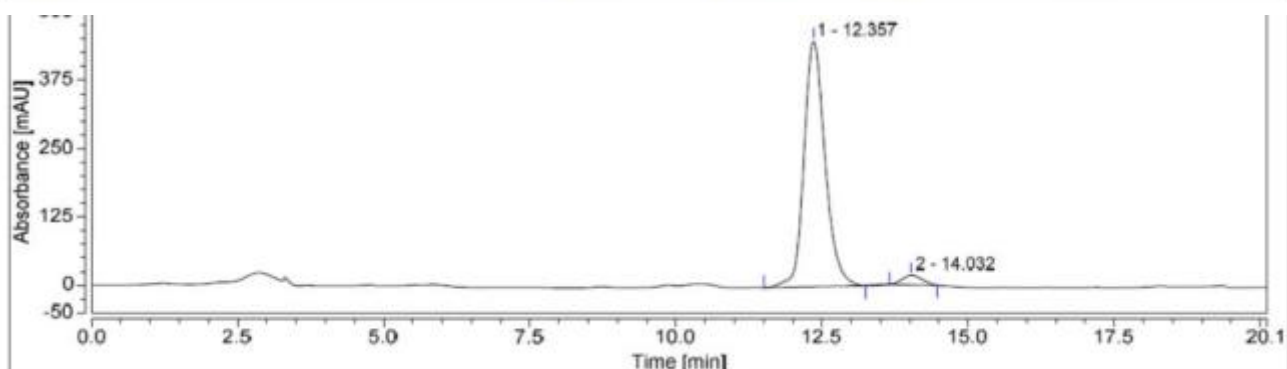

| Integration Results |           |                    |              |            |                 |                   |             |
|---------------------|-----------|--------------------|--------------|------------|-----------------|-------------------|-------------|
| No.                 | Peak Name | Retention Time min | Area mAU*min | Height mAU | Relative Area % | Relative Height % | Amount n.a. |
| 1                   |           | 12.357             | 188.127      | 448.705    | 96.46           | 96.28             | n.a.        |
| 2                   |           | 14.032             | 6.902        | 17.320     | 3.54            | 3.72              | n.a.        |
| Total:              |           |                    | 195.029      | 466.024    | 100.00          | 100.00            |             |

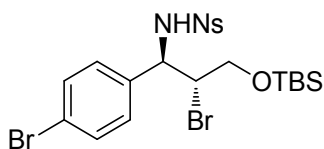

***N*-(2-Bromo-1-(4-bromophenyl)-3-((*tert*-butyldimethylsilyloxy)propyl)-4-nitrobenzenesulfonamide (3d)**

White solide ,  $[\alpha]_{20}^D -32.7$  (*c* 2.5, CHCl<sub>3</sub>, 90% ee); IR (KBr): 3440, 2925, 1736, 1624, 1532, 1463, 1166 cm<sup>-1</sup>; <sup>1</sup>HNMR (400 MHz, CDCl<sub>3</sub>)  $\delta$  8.22 (d, *J* = 8.6 Hz, 2H), 7.85 (d, *J* = 8.6 Hz, 2H), 7.39 (d, *J* = 8.1 Hz, 2H), 7.11 (d, *J* = 8.1 Hz, 2H), 6.63 (d, *J* = 7.0 Hz, 1H), 4.90 (dd, *J* = 6.4, 4.4 Hz, 1H), 4.14 (s, 1H), 3.81 (d, *J* = 11.3 Hz, 1H), 3.51 (dd, *J* = 11.2, 6.0 Hz, 1H), 0.97 (s, 9H), 0.10 (s, 3H),

0.09 (s, 3H);  $^{13}\text{C}$  NMR (100 MHz,  $\text{CDCl}_3$ )  $\delta$  149.7, 146.0, 135.7, 131.6, 128.9, 128.3, 124.0, 122.5, 64.1, 60.9, 54.2, 25.7, 18.1, -5.5, -5.6; HRMS (ESI) calcd for  $\text{C}_{21}\text{H}_{28}\text{Br}_2\text{N}_2\text{O}_5\text{SSiNa}$   $m/z$   $[\text{M} + \text{Na}]^+$ : 628.9747, found: 628.9753; HPLC (Daicel Chiralpak IC, *i*-PrOH/hexane = 8/92, 1.0 mL/min, 214 nm)  $t_1$  = 12.4 min (major),  $t_2$  = 14.1 min (minor).

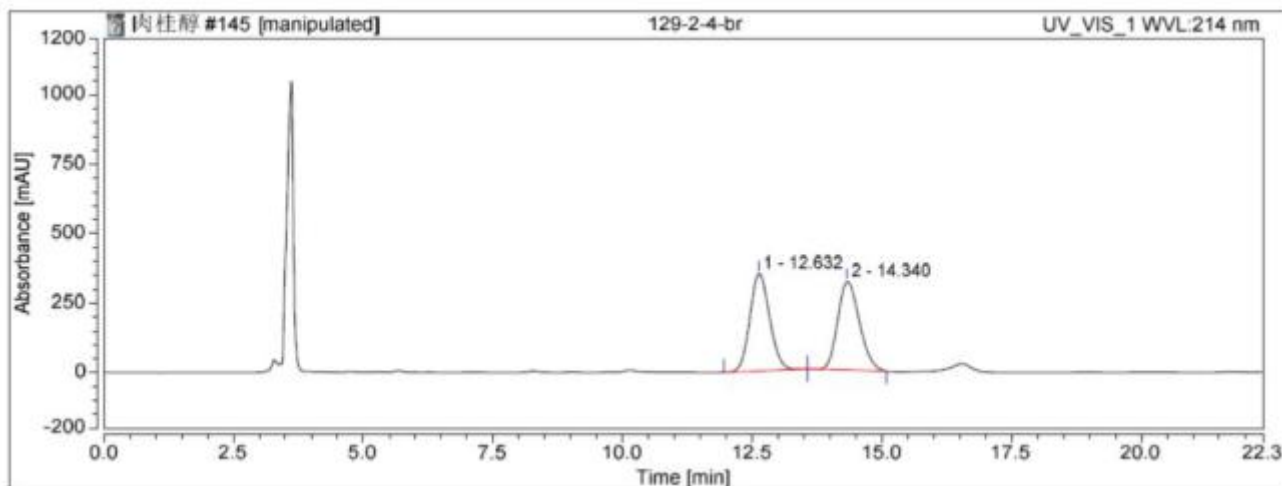

| Integration Results |           |                    |              |            |                 |                   |             |
|---------------------|-----------|--------------------|--------------|------------|-----------------|-------------------|-------------|
| No.                 | Peak Name | Retention Time min | Area mAU*min | Height mAU | Relative Area % | Relative Height % | Amount n.a. |
| 1                   |           | 12.632             | 155.105      | 350.803    | 49.93           | 52.40             | n.a.        |
| 2                   |           | 14.340             | 155.526      | 318.694    | 50.07           | 47.60             | n.a.        |
| Total:              |           |                    | 310.631      | 669.496    | 100.00          | 100.00            |             |

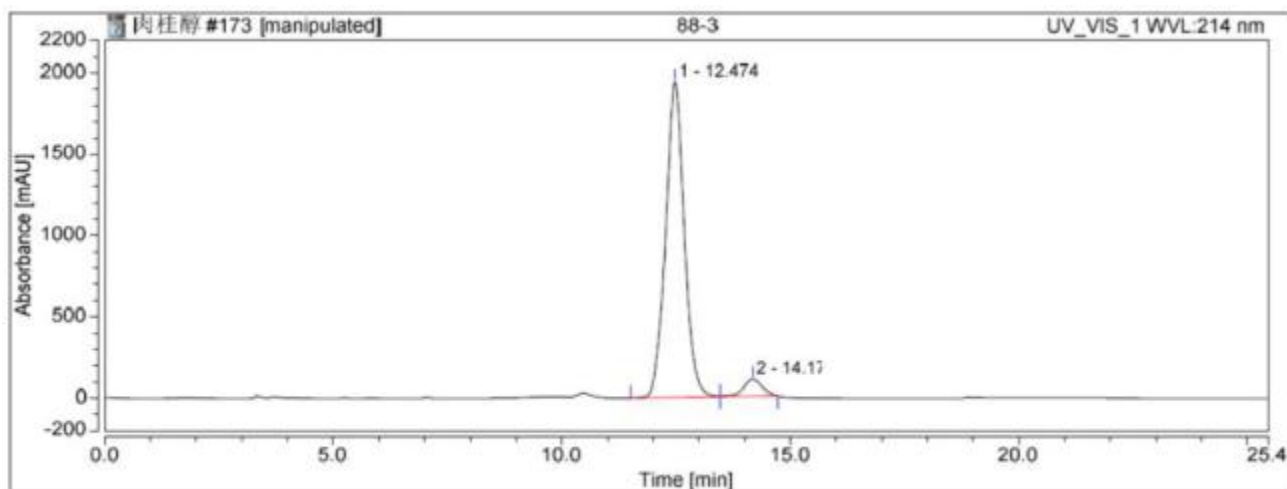

| Integration Results |           |                    |              |            |                 |                   |             |
|---------------------|-----------|--------------------|--------------|------------|-----------------|-------------------|-------------|
| No.                 | Peak Name | Retention Time min | Area mAU*min | Height mAU | Relative Area % | Relative Height % | Amount n.a. |
| 1                   |           | 12.474             | 919.600      | 1942.626   | 94.77           | 94.82             | n.a.        |
| 2                   |           | 14.174             | 50.724       | 106.195    | 5.23            | 5.18              | n.a.        |
| Total:              |           |                    | 970.324      | 2048.820   | 100.00          | 100.00            |             |

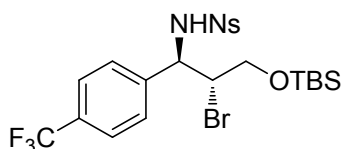

***N*-(2-Bromo-3-((*tert*-butyldimethylsilyl)oxy)-1-(4-(trifluoromethyl)phenyl)propyl)-4-nitrobenzenesulfonamide (3e)**

White solide,  $[\alpha]_{20}^D -30.3$  ( $c$  0.5,  $\text{CHCl}_3$ , 92% ee); IR (KBr): 3343, 2928, 1613, 1533, 1466, 1417, 1167, 1129  $\text{cm}^{-1}$ ;  $^1\text{H}$  NMR (400 MHz,  $\text{CDCl}_3$ )  $\delta$  8.20 (d,  $J = 8.7$  Hz, 2H), 7.86 (d,  $J = 8.7$  Hz, 2H), 7.51 (d,  $J = 8.0$  Hz, 2H), 7.38 (d,  $J = 7.9$  Hz, 2H), 6.77 (d,  $J = 7.4$  Hz, 1H), 5.00 (dd,  $J = 7.2, 4.4$  Hz, 1H), 4.18 (dd,  $J = 3.6, 2.4$  Hz, 1H), 3.79 (dd,  $J = 11.2, 2.4$  Hz, 1H), 3.50 (dd,  $J = 11.2, 6.0$  Hz, 1H), 0.98 (s, 9H), 0.11 (s, 3H), 0.10 (s, 3H);  $^{13}\text{C}$  NMR (100 MHz,  $\text{CDCl}_3$ )  $\delta$  149.8, 145.9, 140.7, 130.7 (q,  $J = 32$  Hz), 128.3, 127.8, 125.5, 125.4 (q,  $J = 3.5$  Hz), 124.0, 64.1, 60.9, 53.9, 25.7, 18.0,  $-5.5, -5.6$ . HRMS (ESI) calcd for  $\text{C}_{22}\text{H}_{28}\text{BrF}_3\text{N}_2\text{O}_5\text{SSiNa}$   $m/z$   $[\text{M} + \text{Na}]^+$ : 619.0516, found: 619.0528; HPLC (Daicel Chiralpak IA, *i*-PrOH/hexane = 8/92, 1.0 mL/min, 270 nm)  $t_1 = 14.0$  min, (major),  $t_2 = 17.4$  min (minor).

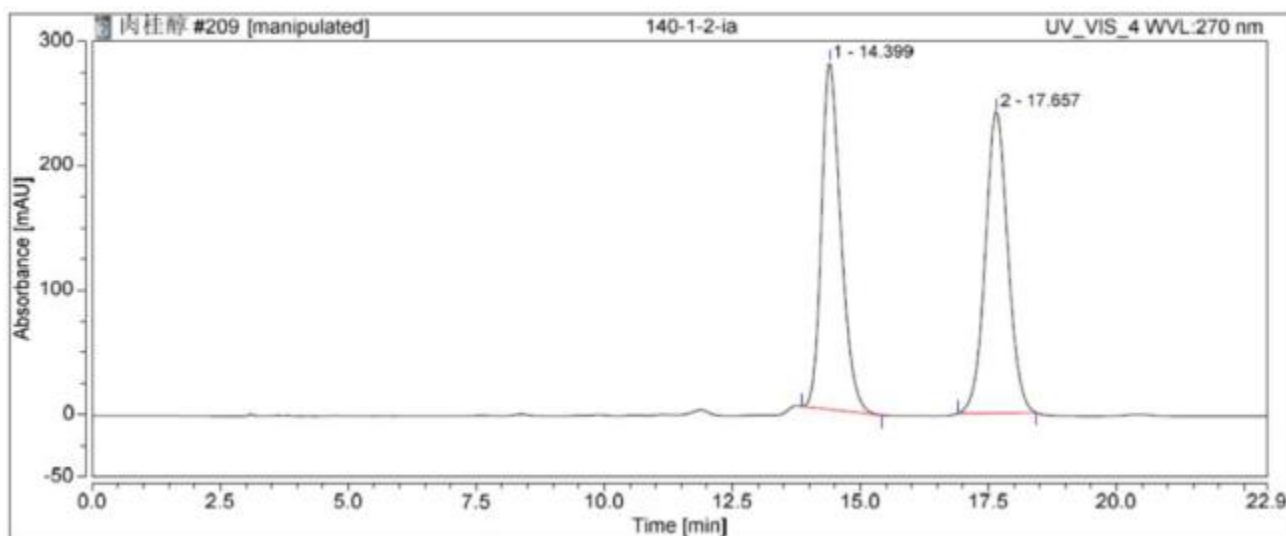

| Integration Results |           |                    |              |            |                 |                   |             |
|---------------------|-----------|--------------------|--------------|------------|-----------------|-------------------|-------------|
| No.                 | Peak Name | Retention Time min | Area mAU*min | Height mAU | Relative Area % | Relative Height % | Amount n.a. |
| 1                   |           | 14.399             | 122.441      | 278.864    | 49.64           | 53.51             | n.a.        |
| 2                   |           | 17.657             | 124.193      | 242.303    | 50.36           | 46.49             | n.a.        |
| Total:              |           |                    | 246.634      | 521.167    | 100.00          | 100.00            |             |

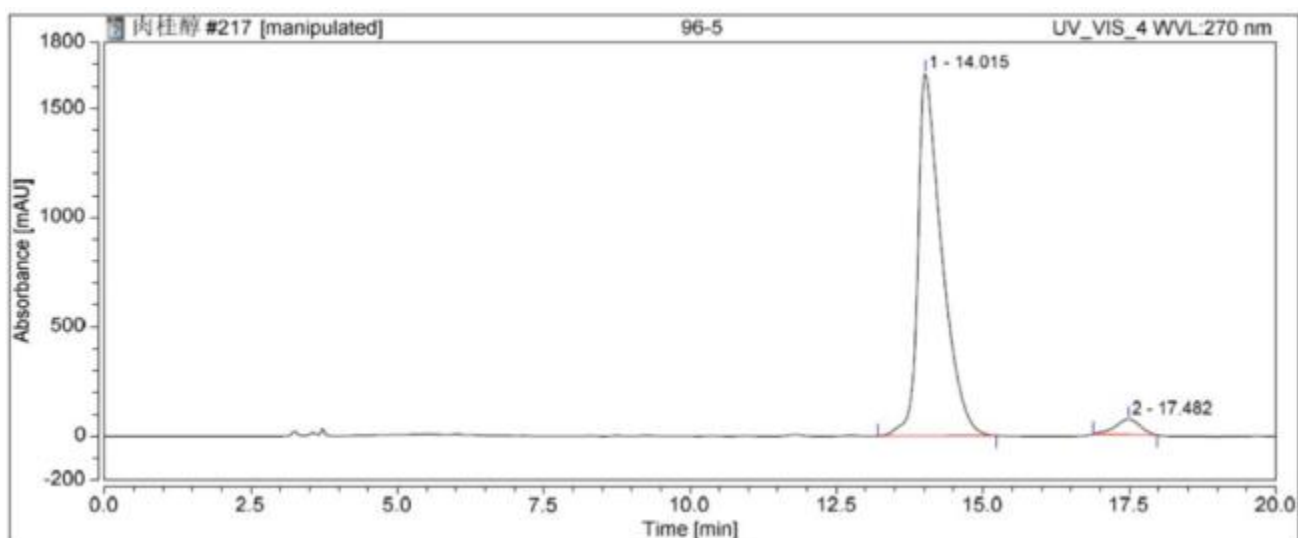

| Integration Results |           |                    |              |            |                 |                   |             |
|---------------------|-----------|--------------------|--------------|------------|-----------------|-------------------|-------------|
| No.                 | Peak Name | Retention Time min | Area mAU*min | Height mAU | Relative Area % | Relative Height % | Amount n.a. |
| 1                   |           | 14.015             | 786.866      | 1657.364   | 95.77           | 95.88             | n.a.        |
| 2                   |           | 17.482             | 34.779       | 71.154     | 4.23            | 4.12              | n.a.        |
| Total:              |           |                    | 821.645      | 1728.517   | 100.00          | 100.00            |             |

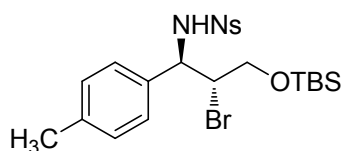

***N*-(2-Bromo-3-((*tert*-butyldimethylsilyl)oxy)-1-(*p*-tolyl)propyl)-4-nitrobenzenesulfonamide (3f)**

White solide,  $[\alpha]_{20}^D -15.0$  ( $c$  1.2,  $\text{CHCl}_3$ , 72% ee) IR (KBr): 3130, 1633, 1531, 1350, 1257, 1166, 1092.  $836\text{ cm}^{-1}$ ;  $^1\text{H NMR}$  (400 MHz,  $\text{CDCl}_3$ )  $\delta$  8.13 (d,  $J = 8.4$  Hz, 2H), 7.79 (d,  $J = 8.4$  Hz, 2H), 6.96-6.89 (m, 4H), 6.61 (d,  $J = 7.5$  Hz, 1H), 4.92 (dd,  $J = 4.0, 2.8$  Hz, 1H), 4.19 (s, 1H), 3.82 (d,  $J = 11.0$  Hz, 1H), 3.51 (dd,  $J = 11.2, 6.0$  Hz, 1H), 2.27 (s, 3H), 0.97 (s, 9H), 0.10 (s, 3H), 0.09 (s, 3H);  $^{13}\text{C NMR}$  (100 MHz,  $\text{CDCl}_3$ )  $\delta$  149.5, 146.3, 138.3, 133.2, 129.0, 128.2, 127.3, 123.7, 64.2, 61.0, 55.1, 25.7, 21.0, 18.1,  $-5.5$ ,  $-5.6$ . HRMS (ESI) calcd for  $\text{C}_{22}\text{H}_{31}\text{BrN}_2\text{O}_5\text{SSiNa}$   $m/z$   $[\text{M} + \text{Na}]^+$ : 565.0799, found: 565.0808; HPLC (Daicel Chiralpak IC, *i*-PrOH/hexane = 8/92, 1.0 mL/min, 214 nm)  $t_1 = 16.3$  min (major),  $t_2 = 20.1$  min (minor).

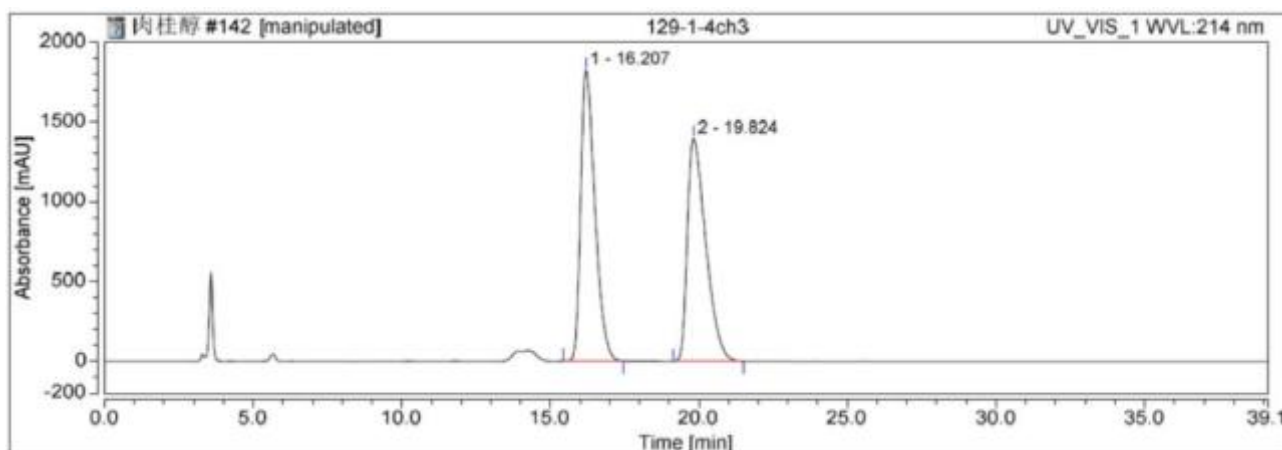

| Integration Results |           |                    |              |            |                 |                   |        |
|---------------------|-----------|--------------------|--------------|------------|-----------------|-------------------|--------|
| No.                 | Peak Name | Retention Time min | Area mAU*min | Height mAU | Relative Area % | Relative Height % | Amount |
| 1                   |           | 16.207             | 1009.970     | 1822.077   | 50.19           | 56.64             | n.a.   |
| 2                   |           | 19.824             | 1002.335     | 1394.988   | 49.81           | 43.36             | n.a.   |
| Total:              |           |                    | 2012.305     | 3217.065   | 100.00          | 100.00            |        |

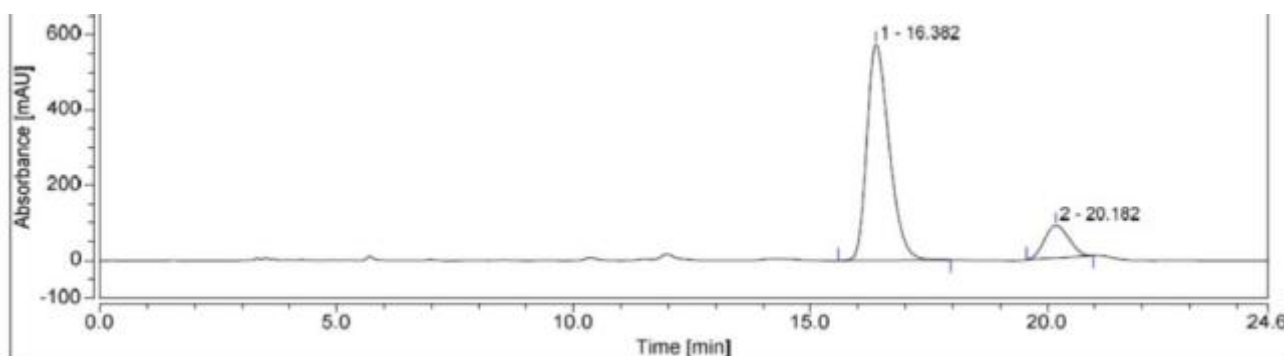

| Integration Results |           |                    |              |            |                 |                   |        |
|---------------------|-----------|--------------------|--------------|------------|-----------------|-------------------|--------|
| No.                 | Peak Name | Retention Time min | Area mAU*min | Height mAU | Relative Area % | Relative Height % | Amount |
| 1                   |           | 16.382             | 313.227      | 575.318    | 85.79           | 86.90             | n.a.   |
| 2                   |           | 20.182             | 51.872       | 86.694     | 14.21           | 13.10             | n.a.   |
| Total:              |           |                    | 365.099      | 662.011    | 100.00          | 100.00            |        |

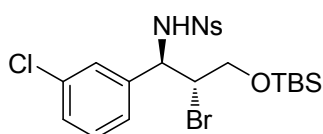

***N*-(2-Bromo-3-((*tert*-butyldimethylsilyloxy)propyl)-1-(3-chlorophenyl)propyl)-4-nitrobenzenesulfonamide (3g)**

Light yellow oil,  $[\alpha]_{20}^D -22.4$  ( $c$  2.6,  $\text{CHCl}_3$ , 95% ee); IR (KBr): 3295, 2929, 1730, 1532, 1350, 1168, 1091  $\text{cm}^{-1}$ ;  $^1\text{H}$ NMR (400 MHz,  $\text{CDCl}_3$ )  $\delta$  8.17 (d,  $J = 8.1$  Hz, 2H), 7.81 (d,  $J = 8.2$  Hz, 2H), 7.19-7.1 (m, 4H), 6.63 (d,  $J = 7.0$  Hz, 1H), 4.94 (s, 1H), 4.17 (s, 1H), 3.80 (d,  $J = 11.0$  Hz, 1H), 3.51 (dd,  $J = 11.2, 6.0$  Hz, 1H), 0.90 (s, 9H), 0.11 (s, 3H), 0.10 (s, 3H);  $^{13}\text{C}$  NMR (100MHz,  $\text{CDCl}_3$ )  $\delta$  149.7, 146.0, 138.2, 134.4, 129.7, 128.5, 128.1, 127.5, 125.7, 123.9, 64.1, 60.5, 54.2, 25.7, 18.0, -5.6,

-5.7. HRMS (ESI) calcd for C<sub>21</sub>H<sub>28</sub>BrClN<sub>2</sub>O<sub>5</sub>SSiNa *m/z* [M + Na]<sup>+</sup>: 585.0252, found: 585.0261; HPLC (Daicel Chiralpak IC, *i*-PrOH/hexane = 8/92, 1.0 mL/min, 270 nm) *t*<sub>1</sub> = 11.8 min (major), *t*<sub>2</sub> = 13.9 min (minor).

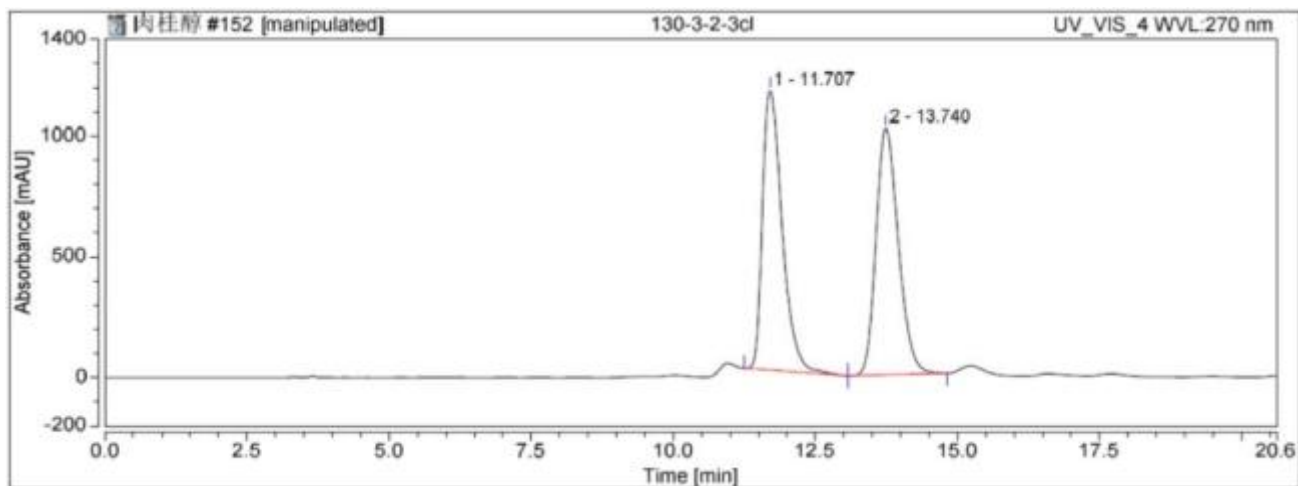

| Integration Results |           |                    |              |            |                 |                   |             |
|---------------------|-----------|--------------------|--------------|------------|-----------------|-------------------|-------------|
| No.                 | Peak Name | Retention Time min | Area mAU*min | Height mAU | Relative Area % | Relative Height % | Amount n.a. |
| 1                   |           | 11.707             | 465.618      | 1156.906   | 49.99           | 53.10             | n.a.        |
| 2                   |           | 13.740             | 465.877      | 1021.763   | 50.01           | 46.90             | n.a.        |
| Total:              |           |                    | 931.495      | 2178.669   | 100.00          | 100.00            |             |

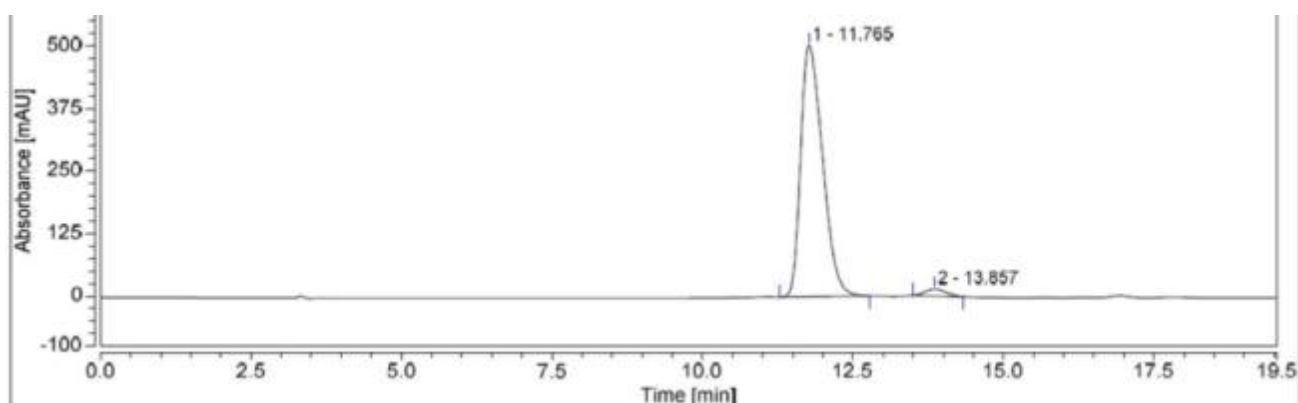

| Integration Results |           |                    |              |            |                 |                   |             |
|---------------------|-----------|--------------------|--------------|------------|-----------------|-------------------|-------------|
| No.                 | Peak Name | Retention Time min | Area mAU*min | Height mAU | Relative Area % | Relative Height % | Amount n.a. |
| 1                   |           | 11.765             | 211.888      | 502.759    | 97.42           | 97.35             | n.a.        |
| 2                   |           | 13.857             | 5.617        | 13.661     | 2.58            | 2.65              | n.a.        |
| Total:              |           |                    | 217.505      | 516.420    | 100.00          | 100.00            |             |

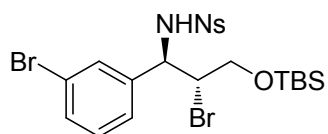

***N*-(2-Bromo-1-(3-bromophenyl)-3-((*tert*-butyldimethylsilyl)oxy)propyl)-4-nitrobenzenesulfonamide (3h)**

White solide,  $[\alpha]_{20}^D -28.5$  ( $c$  2.7,  $\text{CHCl}_3$ , 91% ee); IR (KBr): 3129, 1605, 1257, 1167, 838, 782, 739, 687  $\text{cm}^{-1}$ ;  $^1\text{H}$ NMR (400 MHz,  $\text{CDCl}_3$ )  $\delta$  8.17 (d,  $J = 7.4$  Hz, 2H), 7.80 (d,  $J = 8.1$  Hz, 2H), 7.20 (m, 4H), 6.60 (d,  $J = 6.6$  Hz, 1H), 4.92 (d,  $J = 4.3$  Hz, 1H), 4.16 (s, 1H), 3.80 (d,  $J = 11.2$  Hz, 1H), 3.50 (dd,  $J = 11.2, 6.0$  Hz, 1H), 0.98 (s, 9H), 0.11 (s, 3H), 0.10 (s, 3H);  $^{13}\text{C}$ NMR (100 MHz,  $\text{CDCl}_3$ )  $\delta$  149.8, 146.1, 138.4, 131.5, 130.5, 130.0, 128.1, 126.3, 123.9, 122.6, 64.2, 60.5, 54.1, 25.7, 18.1, -5.5, -5.6. HRMS (ESI) calcd for  $\text{C}_{21}\text{H}_{28}\text{Br}_2\text{N}_2\text{O}_5\text{SSiNa}$   $m/z$   $[\text{M} + \text{Na}]^+$ : 628.9747, found: 628.9766; HPLC (Daicel Chiralpak IC,  $i$ -PrOH/hexane = 8/92, 1.0 mL/min, 230 nm)  $t_1 = 12.2$  min (major),  $t_2 = 14.2$  min (minor).

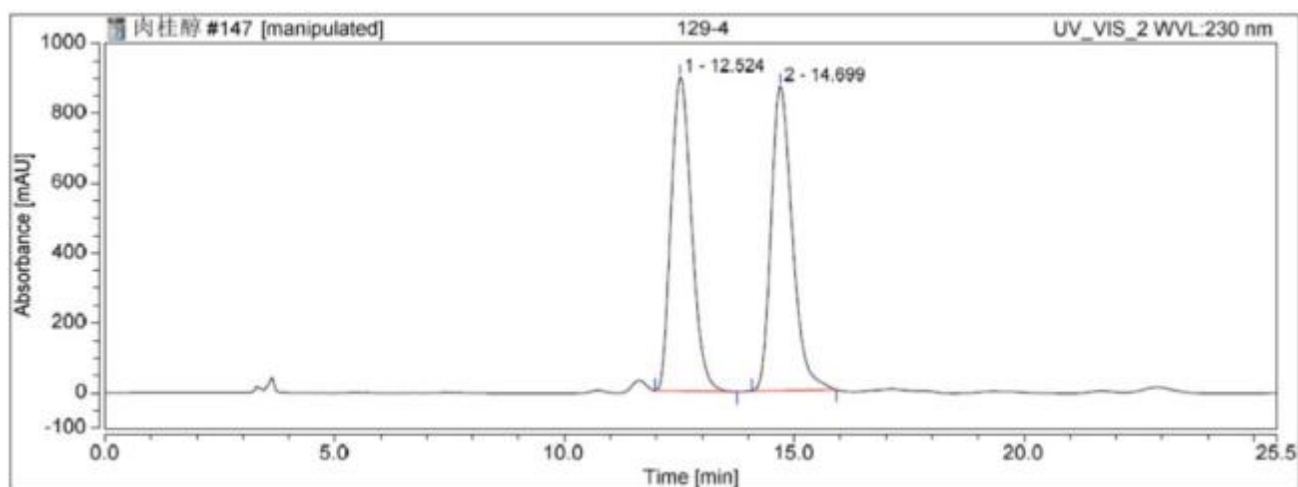

| Integration Results |           |                    |              |            |                 |                   |             |
|---------------------|-----------|--------------------|--------------|------------|-----------------|-------------------|-------------|
| No.                 | Peak Name | Retention Time min | Area mAU*min | Height mAU | Relative Area % | Relative Height % | Amount n.a. |
| 1                   |           | 12.524             | 463.579      | 897.891    | 49.86           | 50.77             | n.a.        |
| 2                   |           | 14.699             | 466.157      | 870.618    | 50.14           | 49.23             | n.a.        |
| Total:              |           |                    | 929.736      | 1768.499   | 100.00          | 100.00            |             |

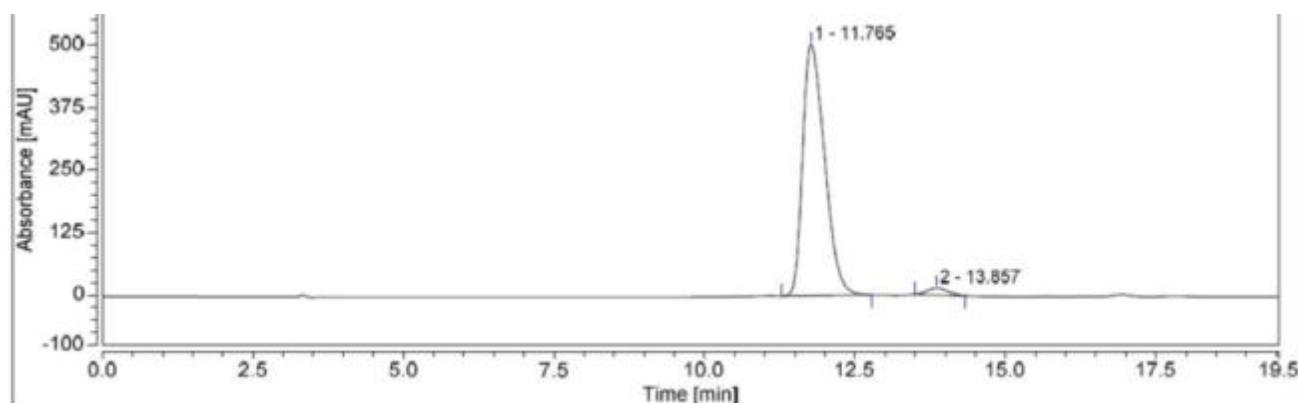

| Integration Results |           |                    |              |            |                 |                   |             |
|---------------------|-----------|--------------------|--------------|------------|-----------------|-------------------|-------------|
| No.                 | Peak Name | Retention Time min | Area mAU*min | Height mAU | Relative Area % | Relative Height % | Amount n.a. |
| 1                   |           | 12.232             | 413.062      | 865.217    | 95.49           | 94.95             | n.a.        |
| 2                   |           | 14.232             | 19.496       | 46.032     | 4.51            | 5.05              | n.a.        |
| Total:              |           |                    | 432.558      | 911.249    | 100.00          | 100.00            |             |

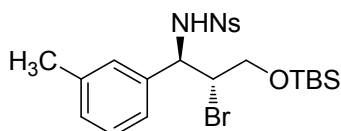

***N*-(2-Bromo-3-((*tert*-butyldimethylsilyloxy)-1-(*m*-tolyl)propyl)-4-nitrobenzenesulfonamide (3i)**

White solide,  $[\alpha]_{20}^D -21.6$  ( $c$  1.0,  $\text{CHCl}_3$ , 82% ee); IR (KBr): 3129, 1610, 1531, 1351, 1167, 1095, 839  $\text{cm}^{-1}$ ;  $^1\text{H}$ NMR (400 MHz,  $\text{CDCl}_3$ )  $\delta$  8.09 (d,  $J = 8.2$  Hz, 2H), 7.79 (d,  $J = 8.3$  Hz, 2H), 7.05-6.91 (m, 4H), 6.69 (d,  $J = 7.6$  Hz, 1H), 4.93 (s, 1H), 4.19 (s, 1H), 3.79 (d,  $J = 9.3$  Hz, 1H), 3.50 (dd,  $J = 11.2, 6.0$  Hz, 1H), 2.16 (s, 3H), 0.89 (s, 9H), 0.09 (s, 3H), 0.07 (s, 3H);  $^{13}\text{C}$ NMR (100 MHz,  $\text{CDCl}_3$ )  $\delta$  149.4, 148.9, 146.2, 137.8, 135.9, 128.9, 128.1, 128.0, 124.5, 123.5, 64.1, 60.9, 55.0, 25.6, 21.1, 18.0, -5.6, -5.7; HRMS (ESI) calcd for  $\text{C}_{22}\text{H}_{31}\text{BrN}_2\text{O}_5\text{SSiNa}$   $m/z$   $[\text{M} + \text{Na}]^+$ : 565.0799, found: 565.0801; HPLC (Daicel Chiralpak IC, *i*-PrOH/hexane = 8/92, 1.0 mL/min, 254 nm)  $t_1 = 15.4$  min (major),  $t_2 = 17.8$  min (minor).

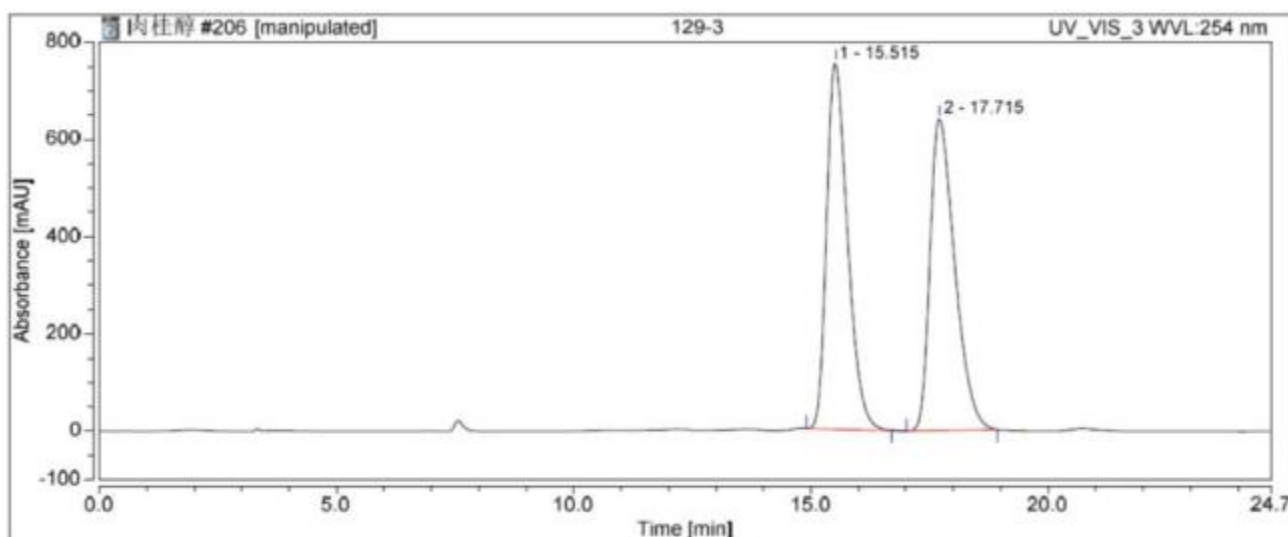

| Integration Results |           |                       |                 |                 |                    |                      |                |
|---------------------|-----------|-----------------------|-----------------|-----------------|--------------------|----------------------|----------------|
| No.                 | Peak Name | Retention Time<br>min | Area<br>mAU*min | Height<br>mAU   | Relative Area<br>% | Relative Height<br>% | Amount<br>n.a. |
| 1                   |           | 15.515                | 388.549         | 754.005         | 49.94              | 54.02                | n.a.           |
| 2                   |           | 17.715                | 387.440         | 641.704         | 50.06              | 45.98                | n.a.           |
| <b>Total:</b>       |           |                       | <b>773.990</b>  | <b>1395.710</b> | <b>100.00</b>      | <b>100.00</b>        |                |



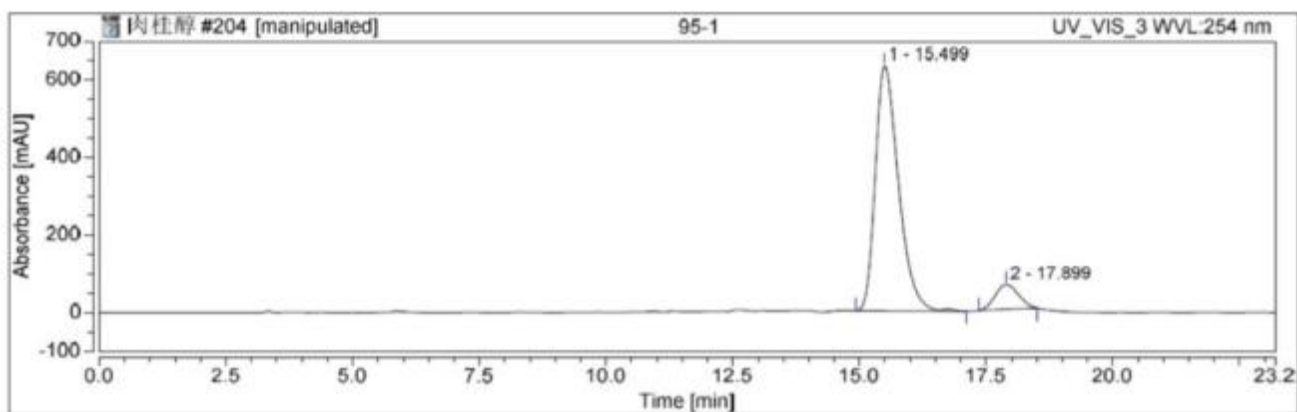

| Integration Results |           |                    |              |            |                 |                   |             |
|---------------------|-----------|--------------------|--------------|------------|-----------------|-------------------|-------------|
| No.                 | Peak Name | Retention Time min | Area mAU*min | Height mAU | Relative Area % | Relative Height % | Amount n.a. |
| 1                   |           | 15.499             | 336.881      | 632.804    | 90.76           | 90.78             | n.a.        |
| 2                   |           | 17.899             | 34.295       | 64.297     | 9.24            | 9.22              | n.a.        |
| Total:              |           |                    | 371.176      | 697.100    | 100.00          | 100.00            |             |

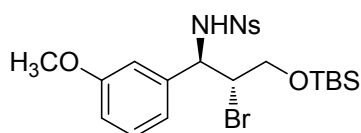

***N*-(2-Bromo-3-((*tert*-butyldimethylsilyl)oxy)-1-(3-methoxyphenyl)propyl)-4-nitrobenzenesulfonamide (3j)**

Colourless oil,  $[\alpha]_{20}^D -22.2$  ( $c$  2.4,  $\text{CHCl}_3$ , 90% ee); IR (KBr): 3453, 2928, 1604, 1349, 1258, 1165, 1092  $\text{cm}^{-1}$ ;  $^1\text{H}$ NMR (400 MHz,  $\text{CDCl}_3$ )  $\delta$  8.12 (d,  $J = 8.1$  Hz, 2H), 7.80 (d,  $J = 8.2$  Hz, 2H), 7.10 (t,  $J = 8.0$  Hz, 1H), 6.77-6.64 (m, 4H), 4.94 (d,  $J = 4.0$  Hz, 1H), 4.20 (s, 1H), 3.83 (d,  $J = 11.2$  Hz, 1H), 3.67 (s, 3H), 3.52 (dd,  $J = 11.2, 6.0$  Hz, 1H), 0.96 (s, 9H), 0.10 (s, 3H), 0.08 (s, 3H);  $^{13}\text{C}$  NMR (100 MHz,  $\text{CDCl}_3$ )  $\delta$  159.4, 149.5, 146.2, 137.6, 129.4, 128.1, 123.7, 119.7, 113.3, 113.2, 64.2, 61.0, 55.0, 54.8, 25.7, 18.0,  $-5.6, -5.7$ . HRMS (ESI) calcd for  $\text{C}_{22}\text{H}_{31}\text{BrN}_2\text{O}_6\text{SSiNa}$   $m/z$   $[\text{M} + \text{Na}]^+$ : 581.0748, found: 581.0731; HPLC (Daicel Chiralpak IC,  $i$ -PrOH/hexane = 10/90, 1.5mL/min, 270 nm)  $t_1 = 18.2$  min (major),  $t_2 = 22.2$  min (minor).

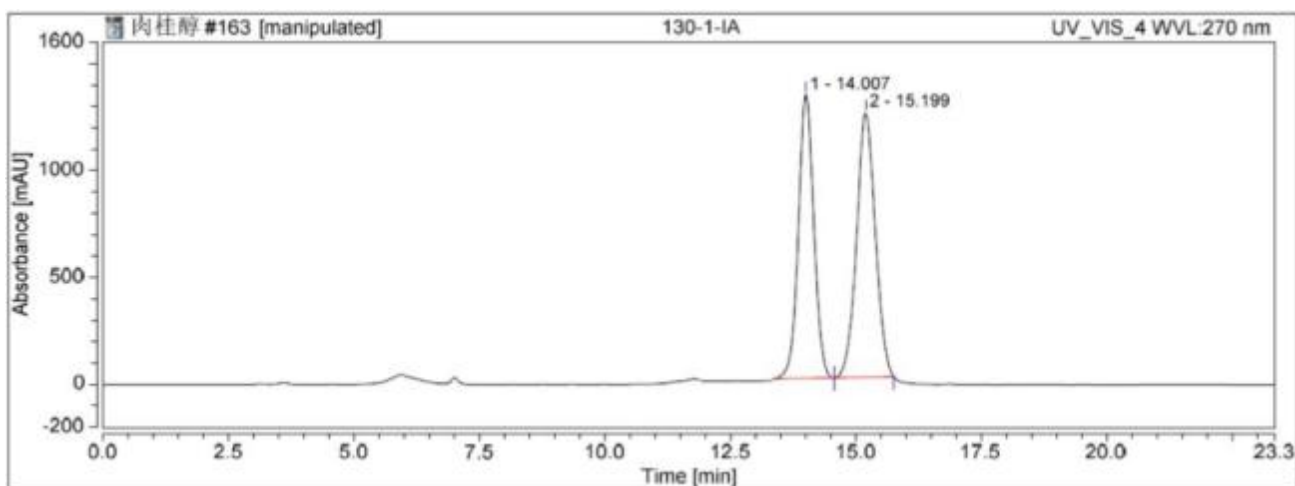

| Integration Results |           |                    |              |            |                 |                   |             |
|---------------------|-----------|--------------------|--------------|------------|-----------------|-------------------|-------------|
| No.                 | Peak Name | Retention Time min | Area mAU*min | Height mAU | Relative Area % | Relative Height % | Amount n.a. |
| 1                   |           | 14.007             | 473.857      | 1327.324   | 48.96           | 51.72             | n.a.        |
| 2                   |           | 15.199             | 535.235      | 1239.033   | 51.04           | 48.28             | n.a.        |
| Total:              |           |                    | 1009.093     | 2566.357   | 100.00          | 100.00            |             |

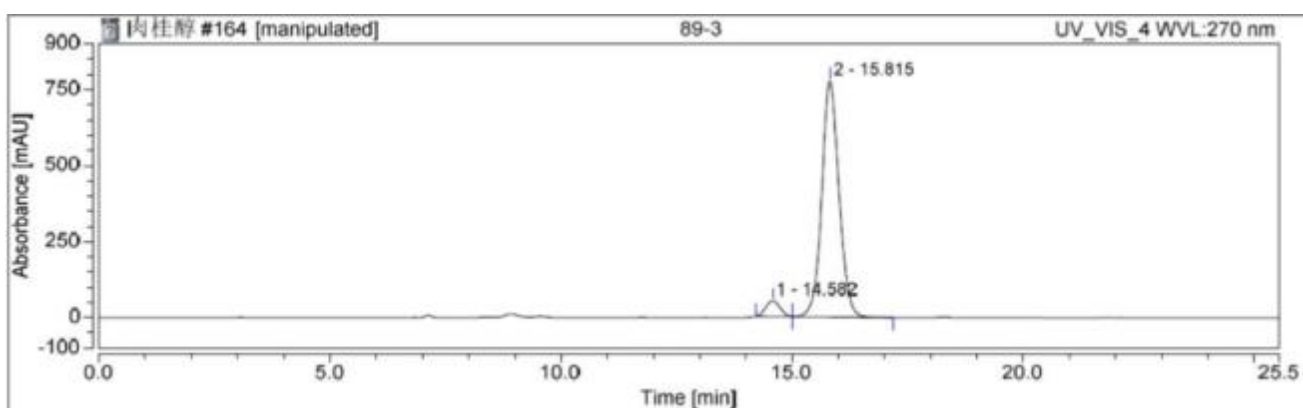

| Integration Results |           |                    |              |            |                 |                   |             |
|---------------------|-----------|--------------------|--------------|------------|-----------------|-------------------|-------------|
| No.                 | Peak Name | Retention Time min | Area mAU*min | Height mAU | Relative Area % | Relative Height % | Amount n.a. |
| 1                   |           | 14.582             | 18.266       | 51.410     | 5.16            | 6.21              | n.a.        |
| 2                   |           | 15.815             | 335.427      | 776.946    | 94.84           | 93.79             | n.a.        |
| Total:              |           |                    | 353.693      | 828.356    | 100.00          | 100.00            |             |

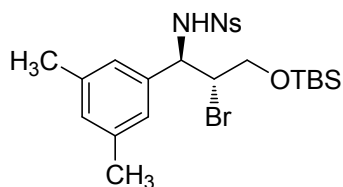

***N*-(2-Bromo-3-((*tert*-butyldimethylsilyl)oxy)-1-(3,5-dimethylphenyl)propyl)-4-nitrobenzenesulfonamide (3k)**

Yellow solid,  $[\alpha]_{20}^D -17.7$  ( $c$  0.7,  $\text{CHCl}_3$ , 72% ee) IR (KBr): 3361, 2972, 1068, 1532, 1348, 1165, 952  $\text{cm}^{-1}$ ;  $^1\text{H}$  NMR (400 MHz,  $\text{CDCl}_3$ )  $\delta$  8.13 (d,  $J = 8.6$  Hz, 2H), 7.80 (d,  $J = 8.6$  Hz, 2H), 6.82 (s, 1H), 6.72 (d,  $J = 12.5$  Hz, 2H), 6.62 (d,  $J = 7.7$  Hz, 1H), 4.88 (dd,  $J = 7.4, 4.1$  Hz, 1H), 4.17 (s, 1H),

3.82 (m, 1H), 3.53 (dd,  $J = 11.2, 5.4$  Hz, 1H), 2.17 (s, 3H), 2.13 (s, 3H), 0.98 (s, 9H), 0.11 (s, 3H), 0.09 (s, 3H);  $^{13}\text{C}$  NMR (100 MHz,  $\text{CDCl}_3$ )  $\delta$  149.5, 146.4, 137.9, 136.1, 129.8, 128.2, 125.2, 123.5, 64.3, 61.4, 54.7, 25.7, 21.1, 18.1,  $-5.7$ ; HRMS (ESI) calcd for  $\text{C}_{23}\text{H}_{33}\text{BrN}_2\text{O}_5\text{SSiNa}$   $m/z$   $[\text{M} + \text{Na}]^+$ : 579.0955, found: 579.0954; HPLC (Daicel Chiralpak IC, *i*-PrOH/hexane = 8/92, 1.0 mL/min, 270 nm)  $t_1 = 15.1$  min (major),  $t_2 = 16.9$  min (minor).

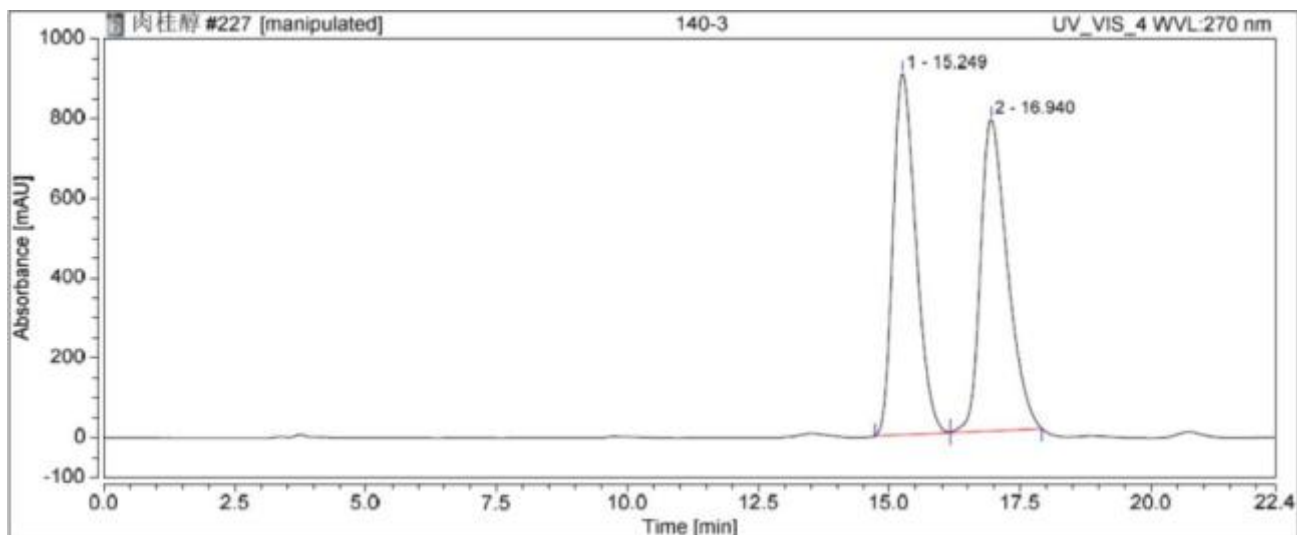

| Integration Results |           |                    |              |            |                 |                   |             |
|---------------------|-----------|--------------------|--------------|------------|-----------------|-------------------|-------------|
| No.                 | Peak Name | Retention Time min | Area mAU*min | Height mAU | Relative Area % | Relative Height % | Amount n.a. |
| 1                   |           | 15.249             | 457.844      | 905.090    | 49.55           | 53.66             | n.a.        |
| 2                   |           | 16.940             | 466.228      | 781.701    | 50.45           | 46.34             | n.a.        |
| Total:              |           |                    | 924.072      | 1686.791   | 100.00          | 100.00            |             |

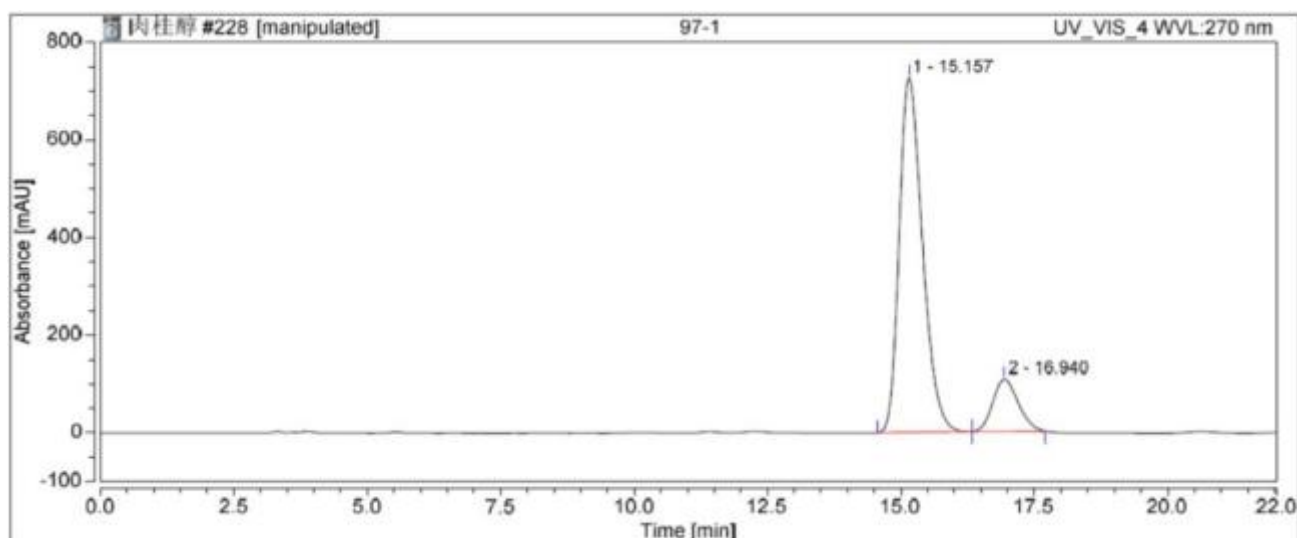

| Integration Results |           |                    |              |            |                 |                   |             |
|---------------------|-----------|--------------------|--------------|------------|-----------------|-------------------|-------------|
| No.                 | Peak Name | Retention Time min | Area mAU*min | Height mAU | Relative Area % | Relative Height % | Amount n.a. |
| 1                   |           | 15.157             | 366.950      | 726.796    | 86.08           | 87.13             | n.a.        |
| 2                   |           | 16.940             | 59.342       | 107.360    | 13.92           | 12.87             | n.a.        |
| Total:              |           |                    | 426.292      | 834.156    | 100.00          | 100.00            |             |

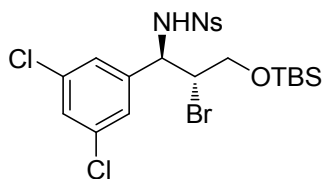

***N*-(2-Bromo-3-((*tert*-butyldimethylsilyl)oxy)-1-(3,5-dichlorophenyl)propyl)-4-nitrobenzenesulfonamide (3I)**

White solide,  $[\alpha]_{20}^D -9.2$  ( $c$  2.8,  $\text{CHCl}_3$ , 95% ee), IR (KBr): 3442, 2927, 1609, 1532, 1468, 1350, 1168, 1092  $\text{cm}^{-1}$ ;  $^1\text{H}$ NMR (400 MHz,  $\text{CDCl}_3$ )  $\delta$  8.23 (d,  $J = 8.4$  Hz, 2H), 7.85 (d,  $J = 8.5$  Hz, 2H), 7.24 (s, 1H), 7.07 (s, 2H), 6.59 (d,  $J = 7.0$  Hz, 1H), 4.89 (dd,  $J = 6.4, 4.0$  Hz, 1H), 4.14-4.09 (m, 1H), 3.80 (d,  $J = 10.5$  Hz, 1H), 3.50 (dd,  $J = 11.2, 6.0$  Hz, 1H), 0.98 (s, 9H), 0.12 (s, 3H), 0.10 (s, 3H);  $^{13}\text{C}$ NMR (100 MHz,  $\text{CDCl}_3$ )  $\delta$  149.9, 145.9, 139.6, 135.2, 128.5, 128.2, 126.1, 124.0, 64.2, 60.1, 53.6, 25.7, 18.1,  $-5.6, -5.7$ ; HRMS (ESI) calcd for  $\text{C}_{21}\text{H}_{27}\text{BrCl}_2\text{N}_2\text{O}_5\text{SSiNa}$   $m/z$   $[\text{M} + \text{Na}]^+$ : 618.9863, found: 618.9850; HPLC (Daicel Chiralpak IC, *i*-PrOH/hexane = 8/92, 1.0 mL/min, 254 nm)  $t_1 = 8.7$  min (major),  $t_2 = 10.4$  min (minor).

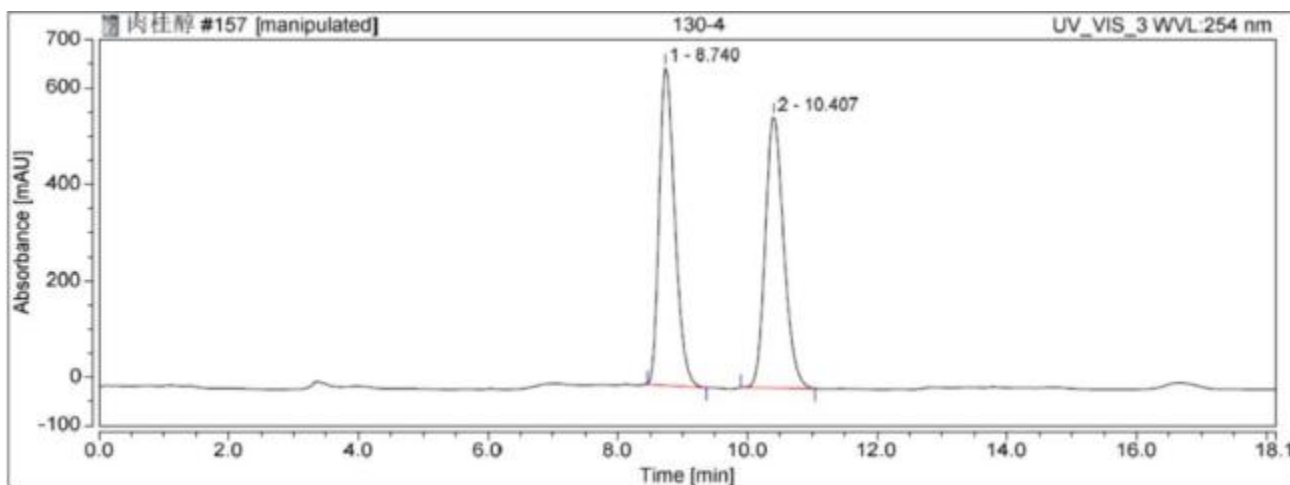

| Integration Results |           |                       |                 |               |                    |                      |                |
|---------------------|-----------|-----------------------|-----------------|---------------|--------------------|----------------------|----------------|
| No.                 | Peak Name | Retention Time<br>min | Area<br>mAU*min | Height<br>mAU | Relative Area<br>% | Relative Height<br>% | Amount<br>n.a. |
| 1                   |           | 8.740                 | 183.737         | 661.004       | 49.62              | 53.96                | n.a.           |
| 2                   |           | 10.407                | 186.524         | 564.088       | 50.38              | 46.04                | n.a.           |
| Total:              |           |                       | 370.261         | 1225.092      | 100.00             | 100.00               |                |

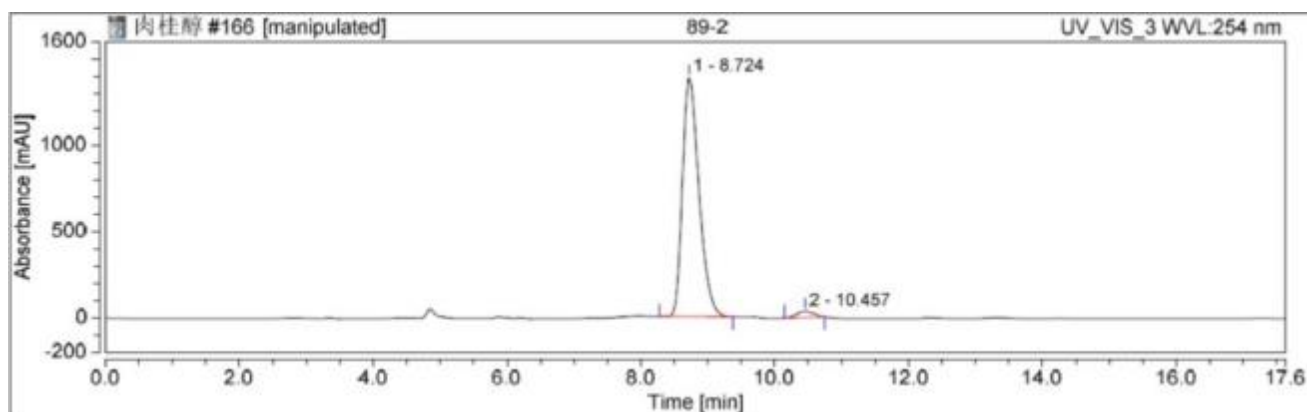

| Integration Results |           |                    |              |            |                 |                   |             |
|---------------------|-----------|--------------------|--------------|------------|-----------------|-------------------|-------------|
| No.                 | Peak Name | Retention Time min | Area mAU*min | Height mAU | Relative Area % | Relative Height % | Amount n.a. |
| 1                   |           | 8.724              | 396.027      | 1387.302   | 97.39           | 97.46             | n.a.        |
| 2                   |           | 10.457             | 10.597       | 36.180     | 2.61            | 2.54              | n.a.        |
| Total:              |           |                    | 406.624      | 1423.482   | 100.00          | 100.00            |             |

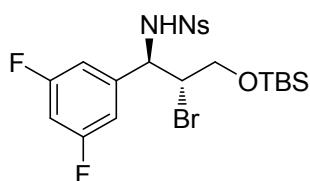

***N*-(2-Bromo-3-((*tert*-butyldimethylsilyloxy)-1-(3,5-difluorophenyl)propyl)-4-nitrobenzenesulfonamide (3m)**

Light yellow oil,  $[\alpha]_{20}^D -18.0$  ( $c$  2.3,  $\text{CHCl}_3$ , 88% ee), IR (KBr): 3298, 2925, 1601, 1532, 1352, 1169, 994  $\text{cm}^{-1}$ ;  $^1\text{H}$  NMR (400 MHz,  $\text{CDCl}_3$ )  $\delta$  8.25 (d,  $J = 8.5$  Hz, 2H), 7.90 (d,  $J = 8.6$  Hz, 2H), 6.69-6.80 (m, 4H), 4.92 (d,  $J = 3.7$  Hz, 1H), 4.15 (s, 1H), 3.80 (d,  $J = 11.3$  Hz, 1H), 3.52 (dd,  $J = 11.3, 6.0$  Hz, 1H), 0.97 (s, 9H), 0.11 (s, 3H), 0.09 (s, 3H);  $^{13}\text{C}$  NMR (100 MHz,  $\text{CDCl}_3$ )  $\delta$  162.8 (dd,  $J = 250.0, 10.0$  Hz), 149.9, 145.9, 140.7 (t,  $J = 8.6$  Hz), 128.3, 124.0, 110.5 (dd,  $J = 24.2, 4.5$  Hz), 103.9 (t,  $J = 24.7$  Hz), 64.1, 60.4, 53.7, 25.7, 18.0,  $-5.6, -5.7$ . HRMS (ESI) calcd for  $\text{C}_{21}\text{H}_{27}\text{BrF}_2\text{N}_2\text{O}_5\text{SSiNa}$   $m/z$   $[\text{M} + \text{Na}]^+$ : 587.0454, found: 587.0452; HPLC (Daicel Chiralpak IC, *i*-PrOH/hexane = 8/92, 1.0 mL/min, 270 nm)  $t_1 = 8.7$  min (major),  $t_2 = 9.7$  min (minor).

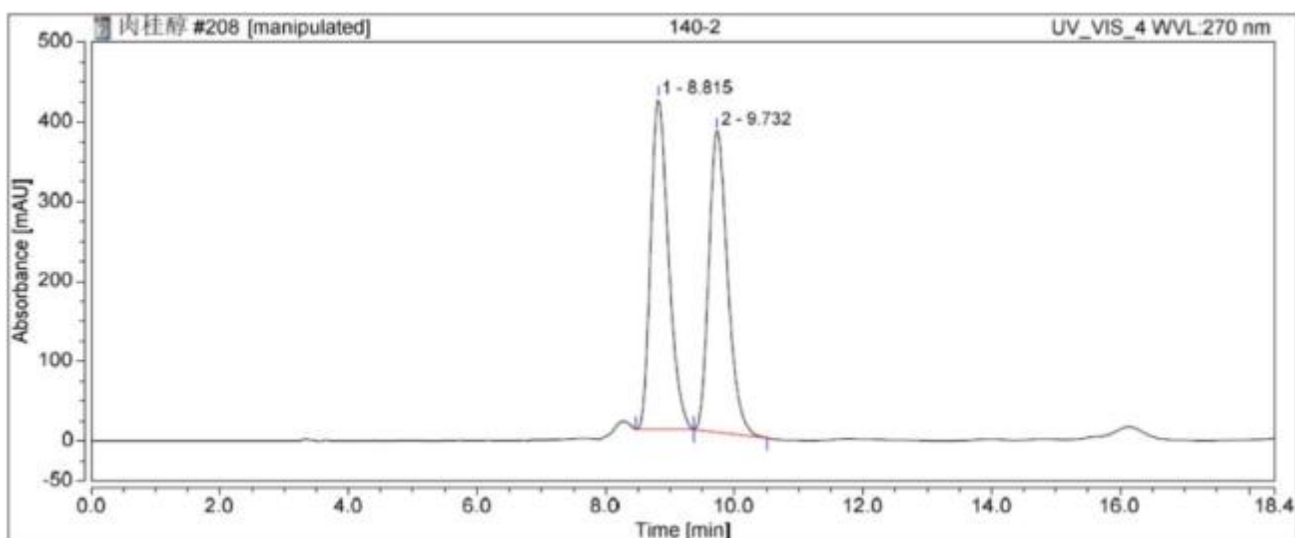

| Integration Results |           |                    |              |            |                 |                   |             |
|---------------------|-----------|--------------------|--------------|------------|-----------------|-------------------|-------------|
| No.                 | Peak Name | Retention Time min | Area mAU*min | Height mAU | Relative Area % | Relative Height % | Amount n.a. |
| 1                   |           | 8.815              | 132.937      | 414.419    | 50.96           | 52.27             | n.a.        |
| 2                   |           | 9.732              | 127.926      | 378.495    | 49.04           | 47.73             | n.a.        |
| Total:              |           |                    | 260.863      | 792.914    | 100.00          | 100.00            |             |

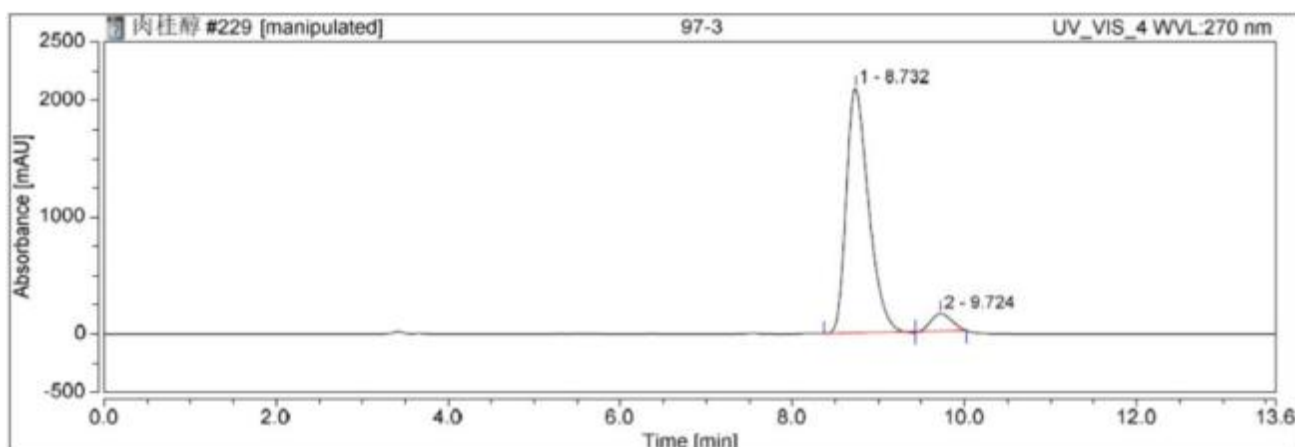

| Integration Results |           |                    |              |            |                 |                   |             |
|---------------------|-----------|--------------------|--------------|------------|-----------------|-------------------|-------------|
| No.                 | Peak Name | Retention Time min | Area mAU*min | Height mAU | Relative Area % | Relative Height % | Amount n.a. |
| 1                   |           | 8.732              | 628.688      | 2095.380   | 93.76           | 93.34             | n.a.        |
| 2                   |           | 9.724              | 41.856       | 149.628    | 6.24            | 6.66              | n.a.        |
| Total:              |           |                    | 670.544      | 2245.009   | 100.00          | 100.00            |             |

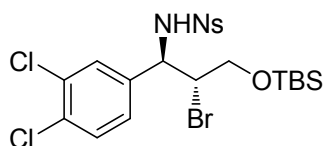

***N*-(2-Bromo-3-((*tert*-butyldimethylsilyloxy)propyl)-1-(3,4-dichlorophenyl)propyl)-4-nitrobenzenesulfonamide (3n)**

White solide,  $[\alpha]_{20}^D -35.0$  ( $c$  0.4,  $\text{CHCl}_3$ , 92% ee); IR (KBr): 3301, 2927, 1607, 1532, 1350, 1168, 1092, 837  $\text{cm}^{-1}$ ;  $^1\text{H}$  NMR (400 MHz,  $\text{CDCl}_3$ )  $\delta$  8.23 (d,  $J = 8.5$  Hz, 2H), 7.85 (d,  $J = 8.5$  Hz, 2H),

7.36-7.34 (m, 2H), 7.11 (d,  $J = 8.1$  Hz, 1H), 6.61 (d,  $J = 7.0$  Hz, 1H), 4.89 (dd,  $J = 4.4, 2.8$  Hz, 1H), 4.13 (d,  $J = 2.4$  Hz, 1H), 3.82-3.79 (m, 1H), 3.50 (dd,  $J = 11.2, 6.0$  Hz, 1H), 0.97 (s, 9H), 0.11 (s, 3H), 0.10 (s, 3H);  $^{13}\text{C}$  NMR (100 MHz,  $\text{CDCl}_3$ )  $\delta$  149.9, 145.9, 136.7, 132.8, 130.4, 129.4, 128.2, 126.8, 124.0, 64.2, 60.2, 53.9, 25.7, 17.9, -5.5, -5.6. HRMS (ESI) calcd for  $\text{C}_{21}\text{H}_{27}\text{BrCl}_2\text{N}_2\text{O}_5\text{SSiNa}$   $m/z$   $[\text{M} + \text{Na}]^+$ : 618.9863, found: 618.9875; HPLC (Daicel Chiralpak IA, *i*-PrOH/hexane = 8/92, 1.0 mL/min, 270 nm)  $t_1 = 13.9$  min (major),  $t_2 = 15.8$  min (minor).

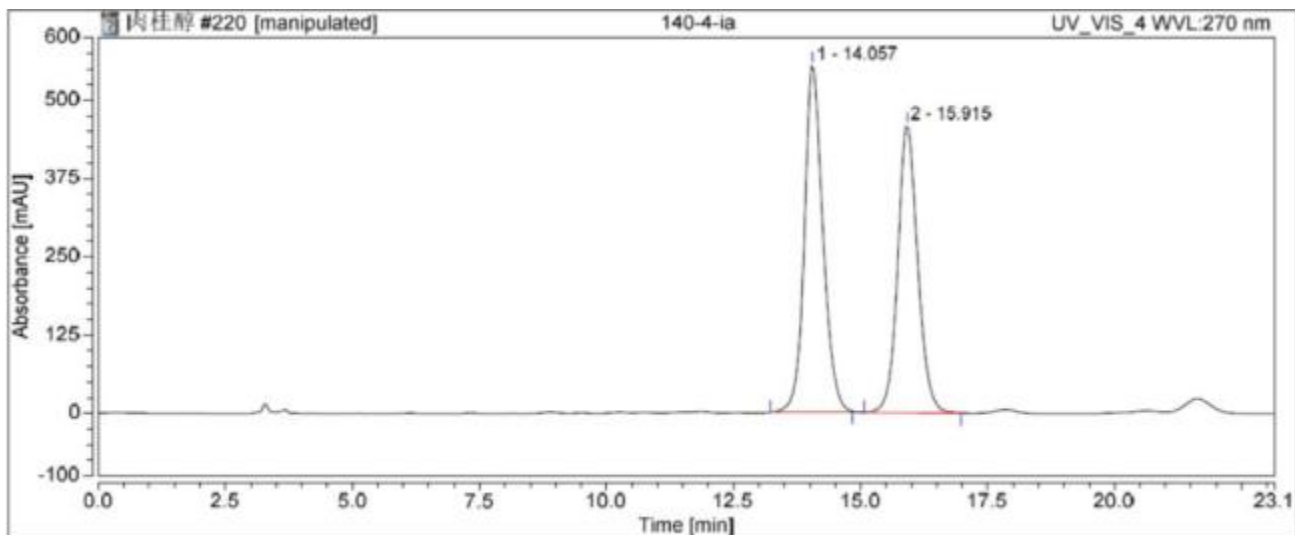

| Integration Results |           |                    |              |            |                 |                   |             |
|---------------------|-----------|--------------------|--------------|------------|-----------------|-------------------|-------------|
| No.                 | Peak Name | Retention Time min | Area mAU*min | Height mAU | Relative Area % | Relative Height % | Amount n.a. |
| 1                   |           | 14.057             | 236.168      | 555.614    | 51.01           | 54.74             | n.a.        |
| 2                   |           | 15.915             | 209.371      | 459.332    | 48.99           | 45.26             | n.a.        |
| Total:              |           |                    | 445.539      | 1014.946   | 100.00          | 100.00            |             |

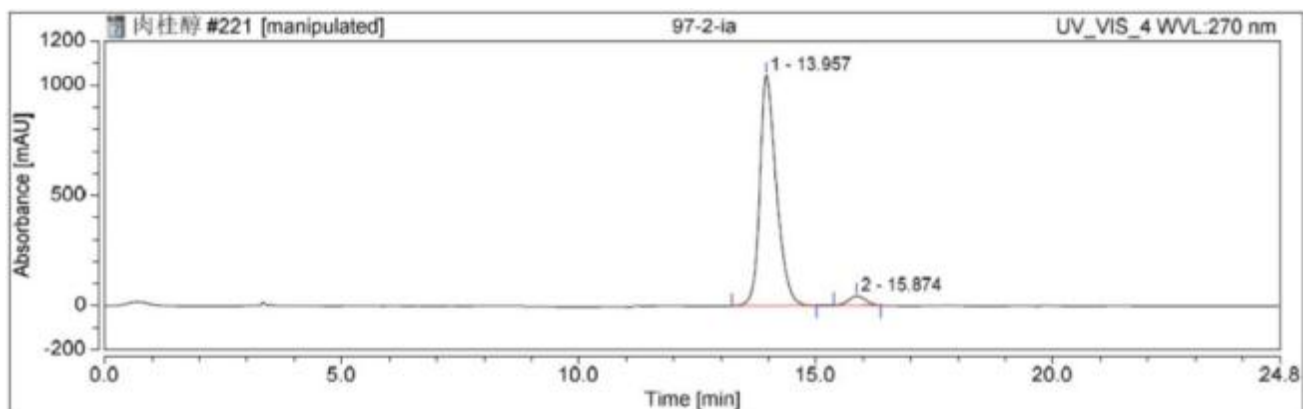

| Integration Results |           |                    |              |            |                 |                   |             |
|---------------------|-----------|--------------------|--------------|------------|-----------------|-------------------|-------------|
| No.                 | Peak Name | Retention Time min | Area mAU*min | Height mAU | Relative Area % | Relative Height % | Amount n.a. |
| 1                   |           | 13.957             | 423.792      | 1045.179   | 95.90           | 96.03             | n.a.        |
| 2                   |           | 15.874             | 18.137       | 43.170     | 4.10            | 3.97              | n.a.        |
| Total:              |           |                    | 441.929      | 1088.349   | 100.00          | 100.00            |             |

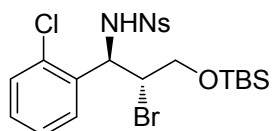

***N*-(2-Bromo-3-((*tert*-butyldimethylsilyl)oxy)-1-(2-chlorophenyl)propyl)-4-nitrobenzenesulfonamide (3o)**

White solide;  $[\alpha]_{20}^D -34.5$  ( $c$  0.6,  $\text{CHCl}_3$ , 83% ee); IR (KBr): 3320, 2927, 1607, 1532, 1351, 1168, 1098  $\text{cm}^{-1}$ ;  $^1\text{H}$ NMR (400 MHz,  $\text{CDCl}_3$ )  $\delta$  8.26 (d,  $J = 8.2$  Hz, 2H), 7.94 (d,  $J = 8.0$  Hz, 2H), 7.49 (s, 1H), 7.32-7.18 (m, 4H), 5.19 (s, 1H), 4.29 (s, 1H), 3.83 (d,  $J = 11.6$  Hz, 1H), 3.68 (d,  $J = 11.4$  Hz, 1H), 1.00 (s, 9H), 0.13 (s, 3H), 0.10 (s, 3H);  $^{13}\text{C}$ NMR (100MHz,  $\text{CDCl}_3$ )  $\delta$  149.8, 146.1, 145.8, 135.5, 132.3, 129.9, 129.7, 128.4, 127.2, 123.9, 64.6, 60.6, 50.6, 25.7, 18.1, -5.6, -5.7; HRMS (ESI) calcd for  $\text{C}_{21}\text{H}_{28}\text{BrClN}_2\text{O}_5\text{SSiNa}$   $m/z$   $[\text{M} + \text{Na}]^+$ : 585.0252, found: 585.0257; HPLC (Daicel Chiralpak IC, *i*-PrOH/hexane = 8/92, 1.0 mL/min, 214 nm)  $t_1 = 17.2$  min (major),  $t_2 = 22.7$  min (minor).

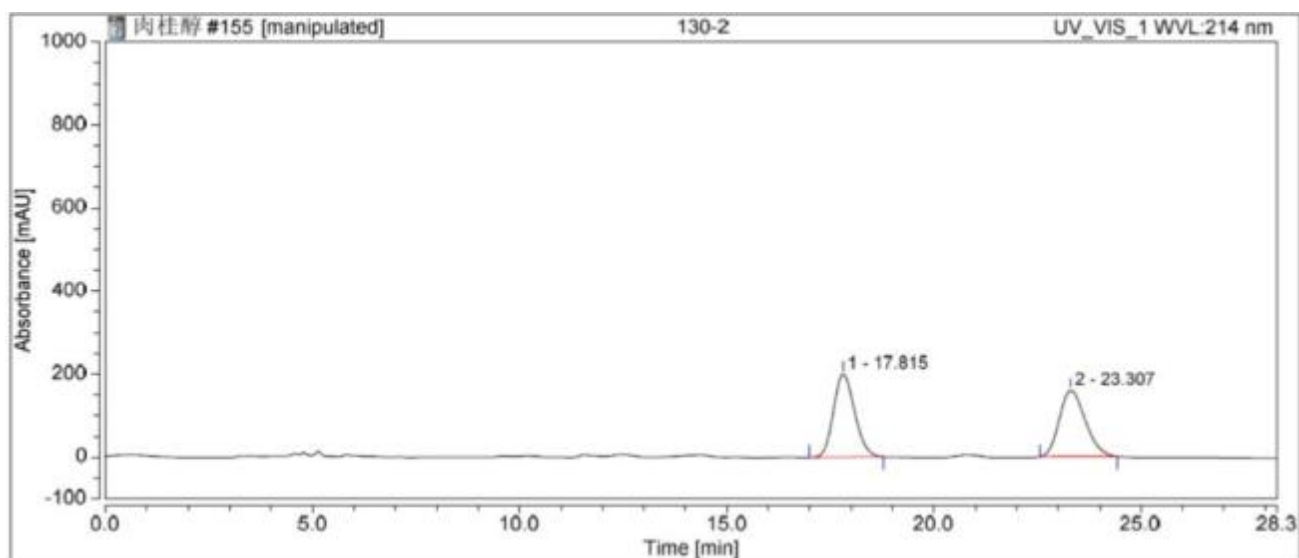

| Integration Results |           |                    |              |            |                 |                   |             |
|---------------------|-----------|--------------------|--------------|------------|-----------------|-------------------|-------------|
| No.                 | Peak Name | Retention Time min | Area mAU*min | Height mAU | Relative Area % | Relative Height % | Amount n.a. |
| 1                   |           | 17.815             | 118.983      | 200.337    | 50.57           | 55.68             | n.a.        |
| 2                   |           | 23.307             | 116.278      | 159.496    | 49.43           | 44.32             | n.a.        |
| Total:              |           |                    | 235.261      | 359.833    | 100.00          | 100.00            |             |



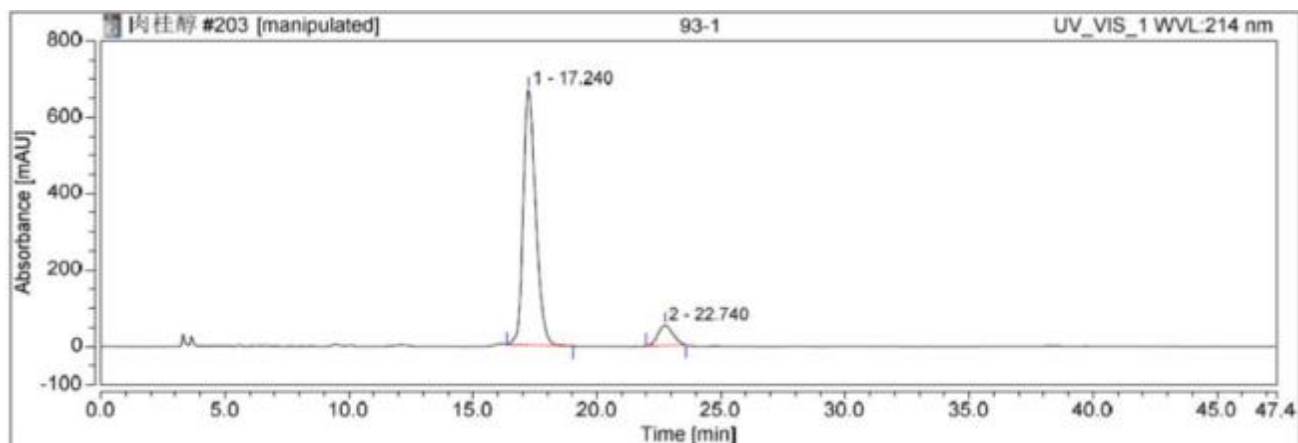

| Integration Results |           |                    |              |            |                 |                   |             |
|---------------------|-----------|--------------------|--------------|------------|-----------------|-------------------|-------------|
| No.                 | Peak Name | Retention Time min | Area mAU*min | Height mAU | Relative Area % | Relative Height % | Amount n.a. |
| 1                   |           | 17.240             | 389.872      | 668.539    | 91.42           | 92.76             | n.a.        |
| 2                   |           | 22.740             | 36.600       | 52.199     | 8.58            | 7.24              | n.a.        |
| Total:              |           |                    | 426.471      | 720.738    | 100.00          | 100.00            |             |

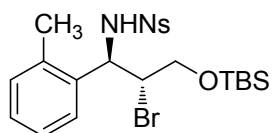

***N*-(2-Bromo-3-((*tert*-butyldimethylsilyl)oxy)-1-(*o*-tolyl)propyl)-4-nitrobenzenesulfonamide (3p)**

White solide,  $[\alpha]_{20}^D -15.9$  ( $c$  1.6,  $\text{CHCl}_3$ , 46% ee) IR (KBr): 3447, 2926, 1609, 1532, 1463, 1351, 1311  $\text{cm}^{-1}$ ;  $^1\text{H}$ NMR (400 MHz,  $\text{CDCl}_3$ )  $\delta$  8.14 (d,  $J = 8.6$  Hz, 2H), 7.74 (d,  $J = 8.6$  Hz, 2H), 7.14 (m, 4H), 6.97 (d,  $J = 5.5$  Hz, 1H), 5.13 (t,  $J = 4.2$  Hz, 1H), 4.03-3.96 (m, 2H), 3.72 (dd,  $J = 11.6, 3.5$  Hz, 1H), 2.36 (s, 3H), 1.00 (s, 9H), 0.15 (s, 3H), 0.12 (s, 3H);  $^{13}\text{C}$ NMR (100 MHz,  $\text{CDCl}_3$ )  $\delta$  149.5, 146.5, 135.65, 135.2, 130.8, 128.2, 128.1, 126.7, 126.2, 123.7, 64.9, 59.9, 51.8, 25.7, 19.1, 18.1, -5.6; HRMS (ESI) calcd for  $\text{C}_{22}\text{H}_{31}\text{BrN}_2\text{O}_5\text{SSiNa}$   $m/z$   $[\text{M} + \text{Na}]^+$ : 565.0799, found: 565.0797; HPLC (Daicel Chiralpak IC, *i*-PrOH/hexane = 8/92, 1.0 mL/min, 270 nm)  $t_1 = 13.3$  min (major),  $t_2 = 15.1$  min (minor).

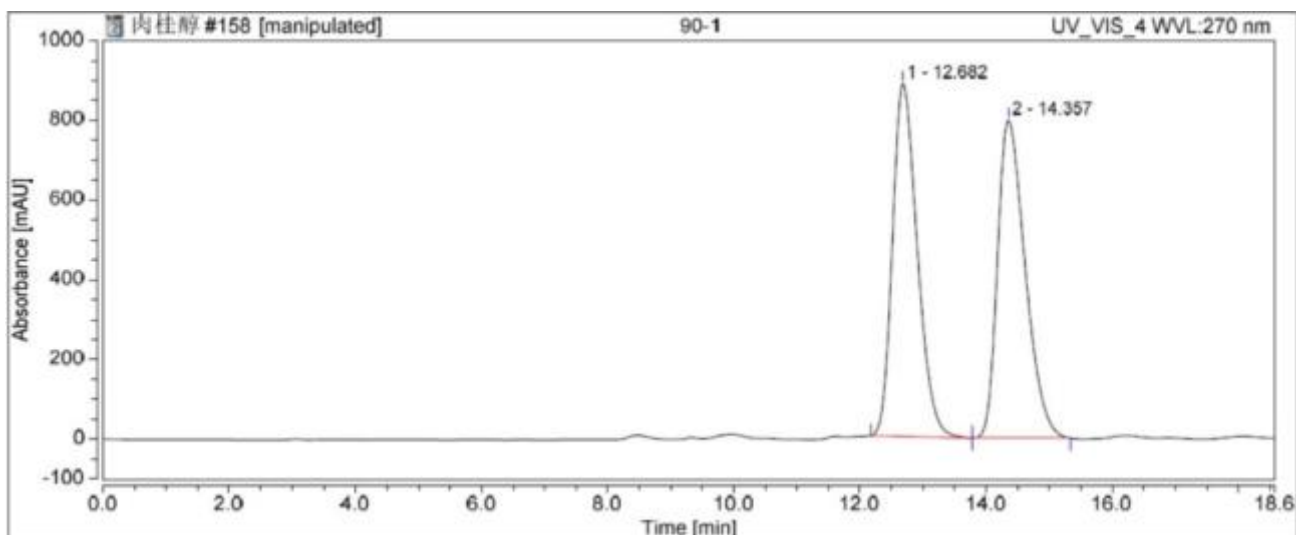

| Integration Results |           |                    |              |            |                 |                   |             |
|---------------------|-----------|--------------------|--------------|------------|-----------------|-------------------|-------------|
| No.                 | Peak Name | Retention Time min | Area mAU*min | Height mAU | Relative Area % | Relative Height % | Amount n.a. |
| 1                   |           | 12.682             | 403.515      | 885.952    | 49.86           | 52.61             | n.a.        |
| 2                   |           | 14.357             | 405.761      | 798.062    | 50.14           | 47.39             | n.a.        |
| Total:              |           |                    | 809.277      | 1684.014   | 100.00          | 100.00            |             |

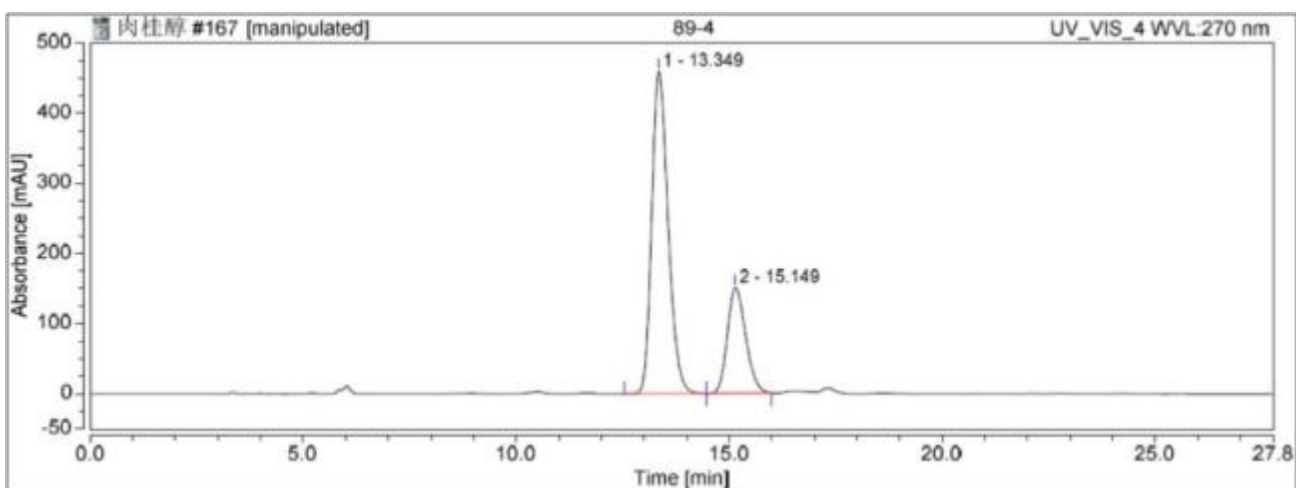

| Integration Results |           |                    |              |            |                 |                   |             |
|---------------------|-----------|--------------------|--------------|------------|-----------------|-------------------|-------------|
| No.                 | Peak Name | Retention Time min | Area mAU*min | Height mAU | Relative Area % | Relative Height % | Amount n.a. |
| 1                   |           | 13.349             | 204.316      | 459.529    | 73.14           | 75.32             | n.a.        |
| 2                   |           | 15.149             | 75.016       | 150.608    | 26.86           | 24.68             | n.a.        |
| Total:              |           |                    | 279.332      | 610.136    | 100.00          | 100.00            |             |

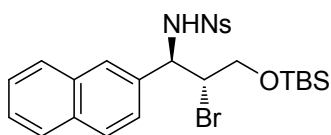

***N*-(2-Bromo-3-((*tert*-butyldimethylsilyloxy)propyl)-1-(naphthalen-2-yl)propyl)-4-nitrobenzenesulfonamide (3q)**

White solide,  $[\alpha]_{20}^D -36.0$  ( $c$  1.0,  $\text{CHCl}_3$ , 79% ee), IR (KBr): 3290, 2928, 1728, 1606, 1531, 1348, 1167, 1091  $\text{cm}^{-1}$ ;  $^1\text{H}$ NMR (400 MHz,  $\text{CDCl}_3$ )  $\delta$  7.94 (d,  $J = 8.5$  Hz, 2H), 7.75 (d,  $J = 8.5$  Hz, 2H),

7.68-7.59 (m, 4H), 7.47-7.45 (m, 2H), 7.29 (d,  $J = 8.2$  Hz, 1H), 6.78 (d,  $J = 7.4$  Hz, 1H), 5.14-5.12 (m, 1H), 4.30 (s, 1H), 3.85 (dd,  $J = 11.2, 2.2$  Hz, 1H), 3.56 (dd,  $J = 11.2, 6.0$  Hz, 1H), 1.01 (s, 9H), 0.12 (s, 3H), 0.11 (s, 3H);  $^{13}\text{C}$ NMR (100 MHz,  $\text{CDCl}_3$ )  $\delta$  149.3, 146.1, 133.4, 132.8, 132.6, 128.2, 128.1, 127.6, 127.5, 127.1, 126.7, 126.6, 124.7, 123.6, 64.3, 61.4, 54.7, 25.7, 18.1, -5.5, -5.6; HRMS (ESI) calcd for  $\text{C}_{25}\text{H}_{31}\text{BrN}_2\text{O}_5\text{SSiNa}$   $m/z$   $[\text{M} + \text{Na}]^+$ : 601.0799, found: 601.0792, HPLC (Daicel Chiralpak IC, *i*-PrOH/hexane = 8/92, 1.0 mL/min, 270 nm)  $t_1 = 16.5$  min (major),  $t_2 = 21.1$  min (minor).

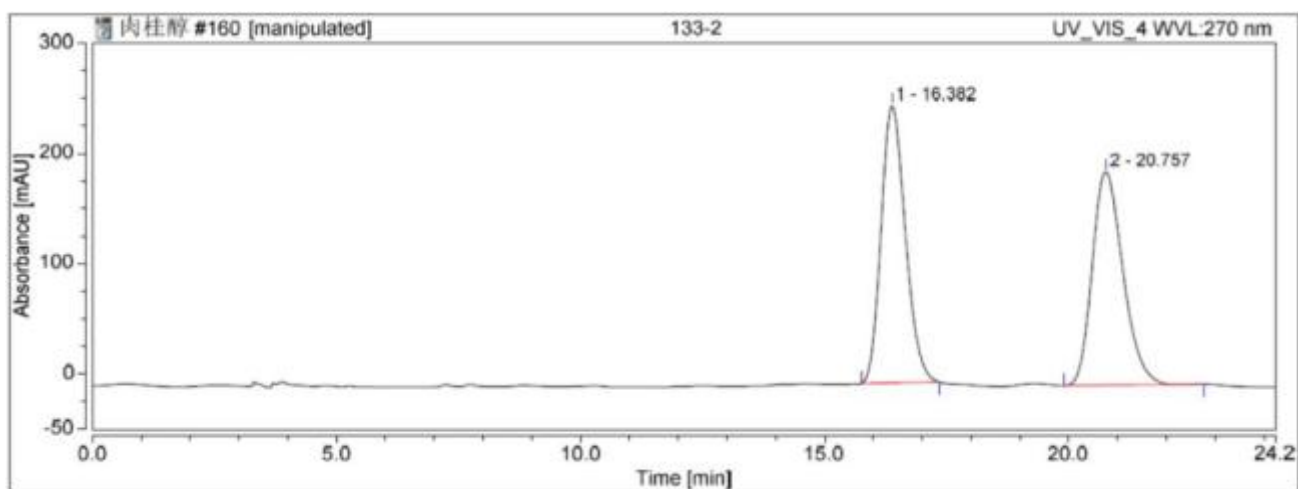

| Integration Results |           |                    |              |            |                 |                   |        |
|---------------------|-----------|--------------------|--------------|------------|-----------------|-------------------|--------|
| No.                 | Peak Name | Retention Time min | Area mAU*min | Height mAU | Relative Area % | Relative Height % | Amount |
| 1                   |           | 16.382             | 144.745      | 251.455    | 50.62           | 56.47             | n.a.   |
| 2                   |           | 20.757             | 141.215      | 193.798    | 49.38           | 43.53             | n.a.   |
| Total:              |           |                    | 285.960      | 445.253    | 100.00          | 100.00            |        |

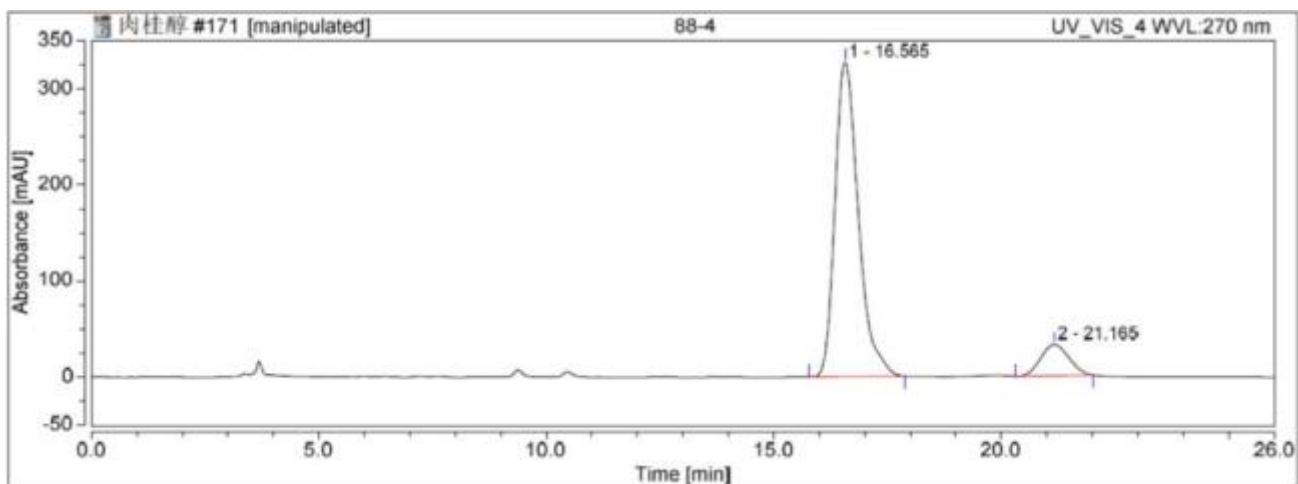

| Integration Results |           |                    |              |            |                 |                   |        |
|---------------------|-----------|--------------------|--------------|------------|-----------------|-------------------|--------|
| No.                 | Peak Name | Retention Time min | Area mAU*min | Height mAU | Relative Area % | Relative Height % | Amount |
| 1                   |           | 16.565             | 195.594      | 328.122    | 89.31           | 91.02             | n.a.   |
| 2                   |           | 21.165             | 23.405       | 32.382     | 10.69           | 8.98              | n.a.   |
| Total:              |           |                    | 218.999      | 360.504    | 100.00          | 100.00            |        |

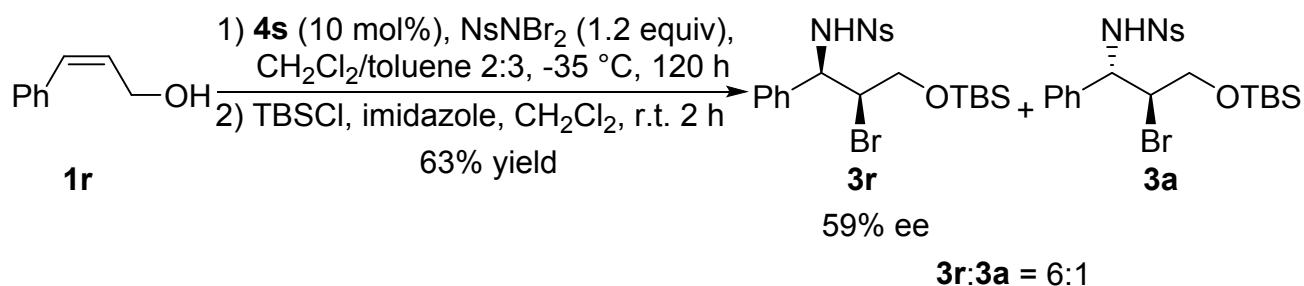

The absolute configuration of **3r** was not determined. Compounds **3r** and **3a** have similar polarity, which could not be separated by column chromatography.

### *N*-(2-Bromo-3-((*tert*-butyldimethylsilyl)oxy)-1-phenylpropyl)-4-nitrobenzenesulfonamide (**3r**)

<sup>1</sup>H NMR (400 MHz, CDCl<sub>3</sub>) δ 8.05 (d, *J* = 8.4 Hz, 2H), 7.71 (d, *J* = 8.5 Hz, 2H), 7.18-7.03 (m, 5H), 5.93 (d, *J* = 7.6 Hz, 1H), 5.03 (d, *J* = 4.8 Hz, 1H), 4.14-4.01 (m, 2H), 3.83-3.75 (m, 2H), 0.95 (s, 9H), 0.11 (s, 6H); <sup>13</sup>C NMR (100 MHz, CDCl<sub>3</sub>) δ 149.5, 146.2, 136.2, 128.2, 128.1, 127.4, 123.7, 58.3, 57.2, 25.8, 18.1, -5.46, -5.49; HPLC (Daicel Chiralpak IA, *i*-PrOH/hexane = 8/92, 1.0 mL/min, 254 nm) *t*<sub>1</sub> = 12.5 min (major), *t*<sub>2</sub> = 21.8 min (minor).

**3a** (IA):

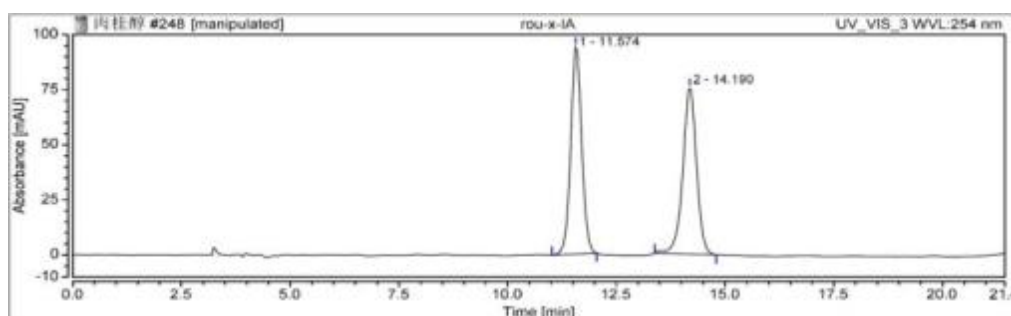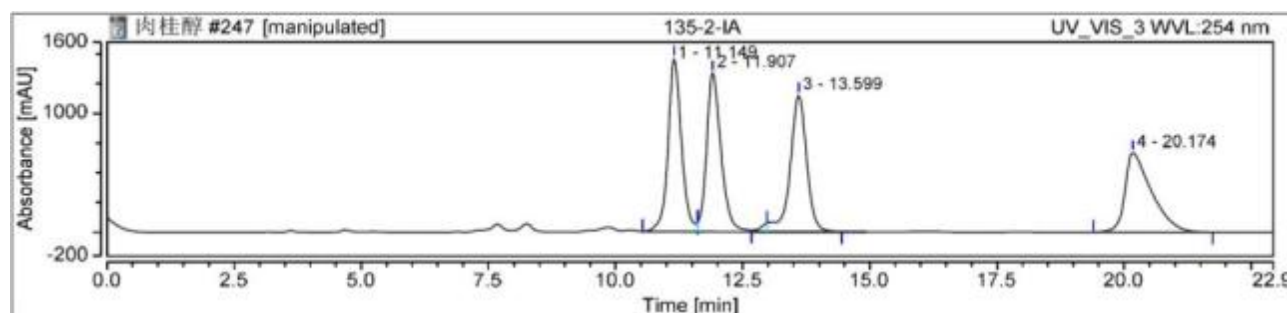

| Integration Results |           |                       |                 |               |                    |                      |                |
|---------------------|-----------|-----------------------|-----------------|---------------|--------------------|----------------------|----------------|
| No.                 | Peak Name | Retention Time<br>min | Area<br>mAU*min | Height<br>mAU | Relative Area<br>% | Relative Height<br>% | Amount<br>n.a. |
| 1                   |           | 11.149                | 446.707         | 1460.305      | 25.87              | 31.62                | n.a.           |
| 2                   |           | 11.907                | 439.439         | 1338.019      | 25.45              | 28.97                | n.a.           |
| 3                   |           | 13.599                | 437.034         | 1152.070      | 25.31              | 24.94                | n.a.           |
| 4                   |           | 20.174                | 403.444         | 668.613       | 23.37              | 14.48                | n.a.           |
| Total:              |           |                       | 1726.624        | 4619.007      | 100.00             | 100.00               |                |

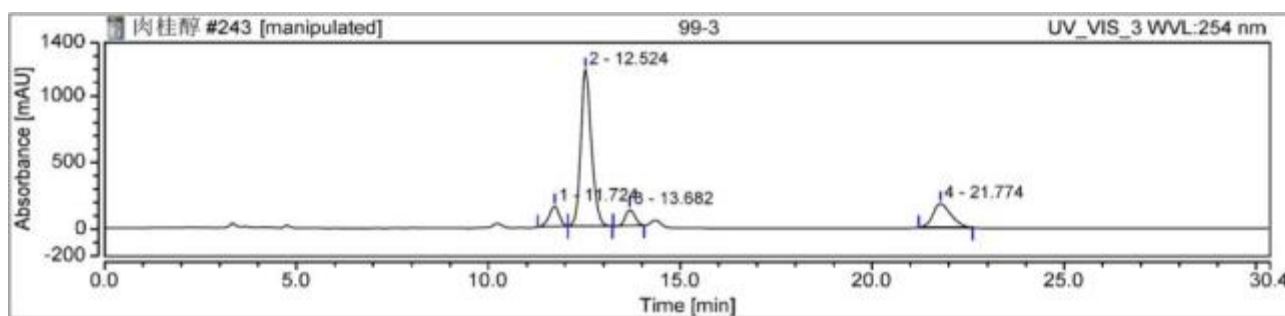

| Integration Results |           |                    |              |            |                 |                   |        |
|---------------------|-----------|--------------------|--------------|------------|-----------------|-------------------|--------|
| No.                 | Peak Name | Retention Time min | Area mAU*min | Height mAU | Relative Area % | Relative Height % | Amount |
| 1                   |           | 11.724             | 46.290       | 151.816    | 8.28            | 9.34              | n.a.   |
| 2                   |           | 12.524             | 378.763      | 1173.081   | 67.79           | 72.20             | n.a.   |
| 3                   |           | 13.682             | 35.046       | 120.384    | 6.27            | 7.41              | n.a.   |
| 4                   |           | 21.774             | 98.671       | 179.558    | 17.66           | 11.05             | n.a.   |
| Total:              |           |                    | 558.771      | 1624.840   | 100.00          | 100.00            |        |

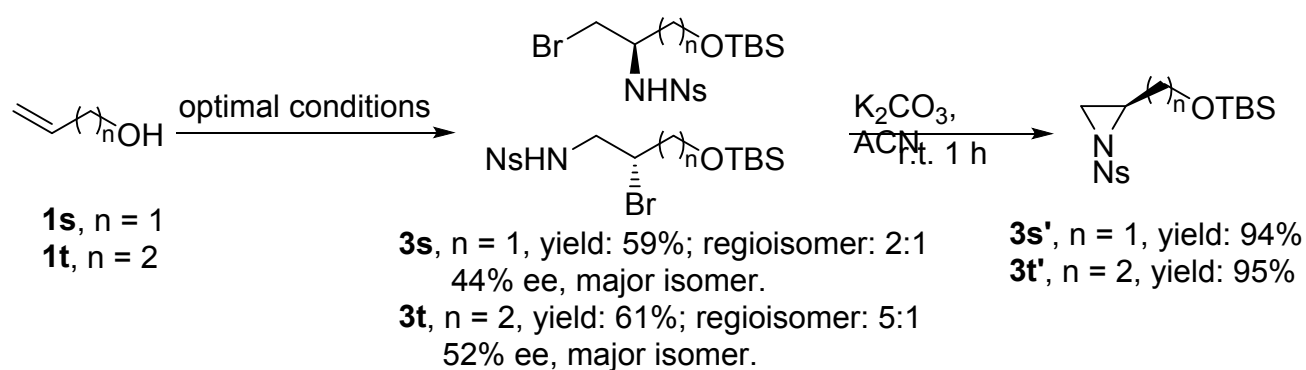

The absolute configuration of **3s**, **3t** were not determined, the ratio of the regioisomers of **3s** and **3t** is 2:1 and 5:1, respectively.<sup>6</sup> Which have similar polarity and are difficult to be separated by column chromatography. To gain pure NMR, further cyclization were performed smoothly.

HPLC of **3s**: Daicel Chiralpak IA, *i*-PrOH/hexane = 8/92, 1.0 mL/min, 270 nm)  $t_1$  = 12.2 min (major),  $t_2$  = 14.1 min (minor).

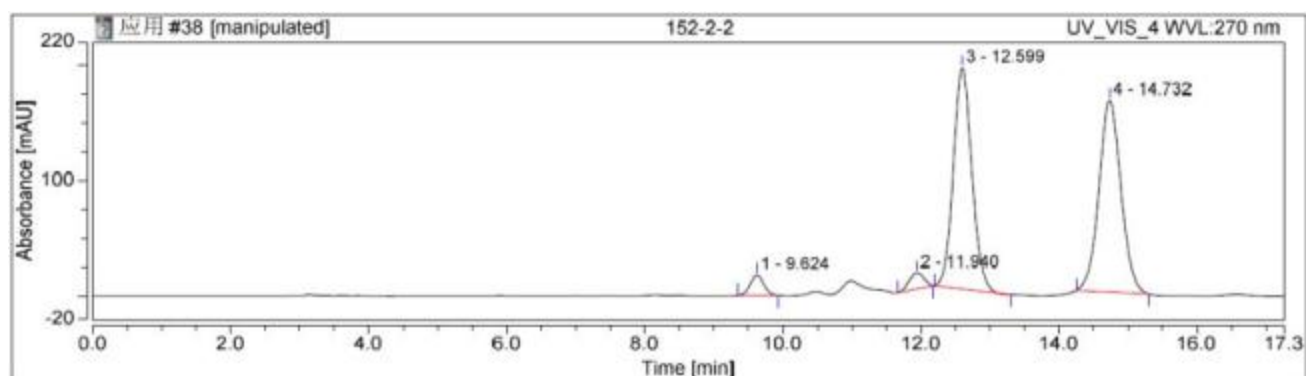

| Integration Results |           |                    |              |            |                 |                   |             |
|---------------------|-----------|--------------------|--------------|------------|-----------------|-------------------|-------------|
| No.                 | Peak Name | Retention Time min | Area mAU*min | Height mAU | Relative Area % | Relative Height % | Amount n.a. |
| 1                   |           | 9.624              | 4.021        | 17.697     | 3.13            | 4.54              | n.a.        |
| 2                   |           | 11.940             | 3.524        | 14.128     | 2.74            | 3.62              | n.a.        |
| 3                   |           | 12.599             | 59.559       | 191.783    | 46.31           | 49.19             | n.a.        |
| 4                   |           | 14.732             | 61.515       | 166.245    | 47.83           | 42.64             | n.a.        |
| Total:              |           |                    | 128.619      | 389.853    | 100.00          | 100.00            |             |

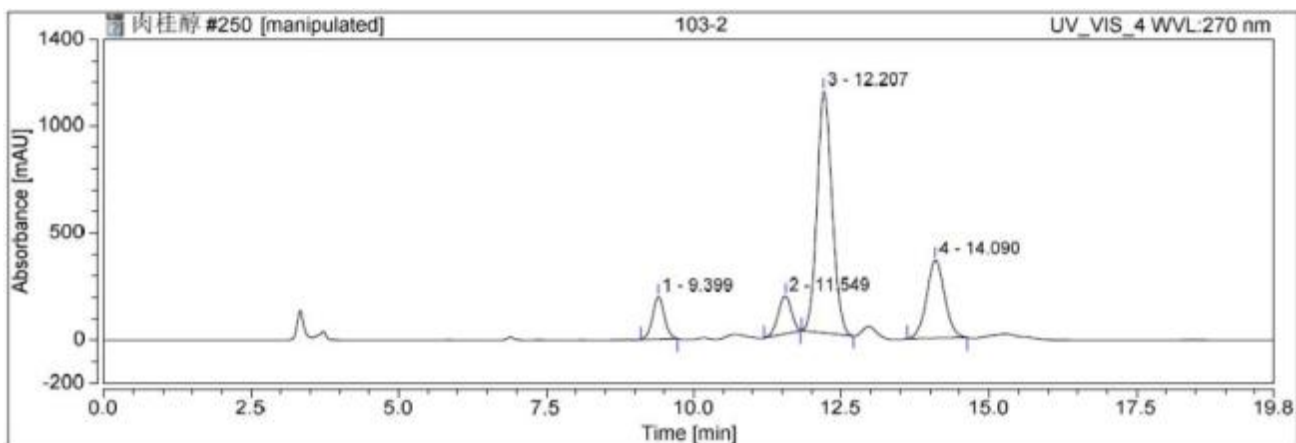

| Integration Results |           |                    |              |            |                 |                   |             |
|---------------------|-----------|--------------------|--------------|------------|-----------------|-------------------|-------------|
| No.                 | Peak Name | Retention Time min | Area mAU*min | Height mAU | Relative Area % | Relative Height % | Amount n.a. |
| 1                   |           | 9.399              | 45.249       | 196.126    | 8.18            | 10.52             | n.a.        |
| 2                   |           | 11.549             | 45.849       | 176.651    | 8.29            | 9.47              | n.a.        |
| 3                   |           | 12.207             | 333.401      | 1127.873   | 60.25           | 60.48             | n.a.        |
| 4                   |           | 14.090             | 128.847      | 364.184    | 23.29           | 19.53             | n.a.        |
| Total:              |           |                    | 553.347      | 1864.834   | 100.00          | 100.00            |             |

HPLC of **3t**: Daicel Chiralpak IA, *i*-PrOH/hexane = 8/92, 1.0 mL/min, 270 nm)  $t_1 = 12.2$  min (major),  $t_2 = 14.1$  min (minor).

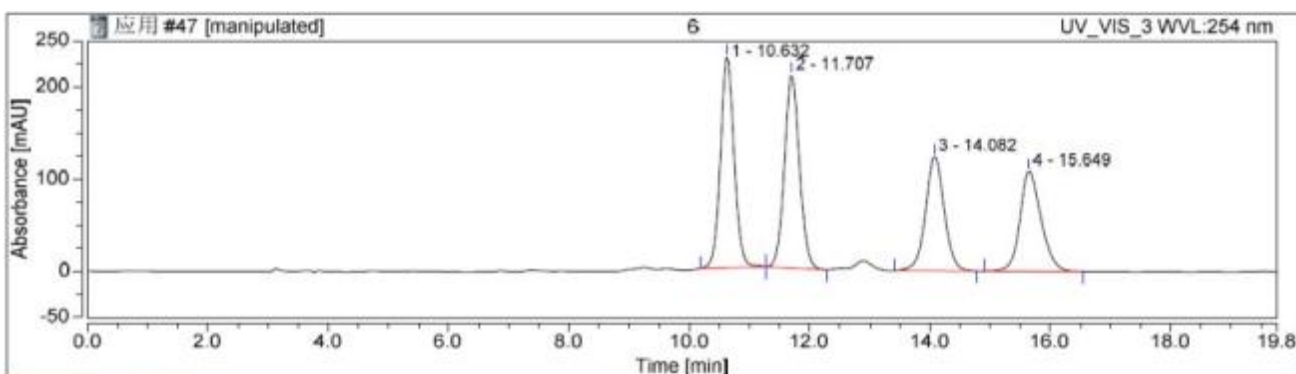

| Integration Results |           |                    |              |            |                 |                   |             |
|---------------------|-----------|--------------------|--------------|------------|-----------------|-------------------|-------------|
| No.                 | Peak Name | Retention Time min | Area mAU*min | Height mAU | Relative Area % | Relative Height % | Amount n.a. |
| 1                   |           | 10.632             | 60.480       | 228.904    | 28.80           | 34.06             | n.a.        |
| 2                   |           | 11.707             | 60.624       | 209.756    | 28.87           | 31.21             | n.a.        |
| 3                   |           | 14.082             | 44.748       | 124.304    | 21.31           | 18.50             | n.a.        |
| 4                   |           | 15.649             | 44.152       | 109.008    | 21.02           | 16.22             | n.a.        |
| Total:              |           |                    | 210.003      | 671.972    | 100.00          | 100.00            |             |

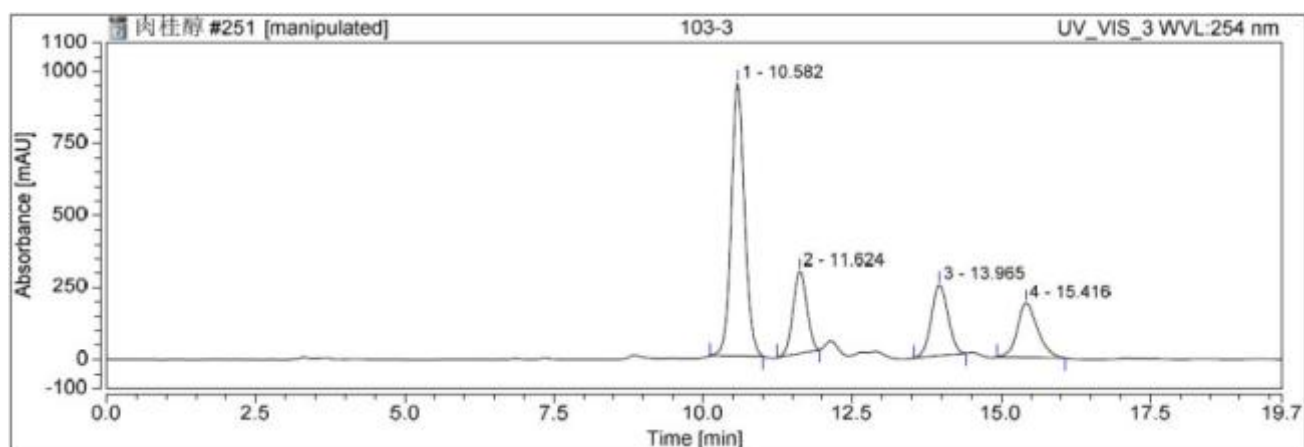

| Integration Results |           |                    |              |            |                 |                   |             |
|---------------------|-----------|--------------------|--------------|------------|-----------------|-------------------|-------------|
| No.                 | Peak Name | Retention Time min | Area mAU*min | Height mAU | Relative Area % | Relative Height % | Amount n.a. |
| 1                   |           | 10.582             | 244.610      | 947.737    | 51.36           | 56.76             | n.a.        |
| 2                   |           | 11.624             | 76.830       | 286.032    | 16.13           | 17.13             | n.a.        |
| 3                   |           | 13.965             | 79.871       | 246.237    | 16.77           | 14.75             | n.a.        |
| 4                   |           | 15.416             | 74.935       | 189.791    | 15.73           | 11.37             | n.a.        |
| Total:              |           |                    | 476.247      | 1669.797   | 100.00          | 100.00            |             |

### 2-(((*tert*-Butyldimethylsilyl)oxy)methyl)-1-((4-nitrophenyl)sulfonyl)aziridine (**3s'**)

Light yellow oil;  $^1\text{H}$  NMR (400 MHz,  $\text{CDCl}_3$ )  $\delta$  8.37 (d,  $J = 8.6$  Hz, 2H), 8.16 (d,  $J = 8.6$  Hz, 2H), 3.79 (dd,  $J = 11.6, 3.0$  Hz, 1H), 3.56 (dd,  $J = 7.6, 5.6$  Hz, 1H), 3.09-3.03 (m, 1H), 2.76 (d,  $J = 7.2$  Hz, 1H), 2.32 (d,  $J = 4.5$  Hz, 1H), 0.78 (s, 9H), -0.04 (s, 3H), -0.05 (s, 3H);  $^{13}\text{C}$  NMR (100 MHz,  $\text{CDCl}_3$ )  $\delta$  150.5, 144.0, 129.2, 124.2, 61.9, 41.8, 30.9, 25.6, 18.2, -5.5, -5.6; HRMS (ESI) calcd for  $\text{C}_{15}\text{H}_{24}\text{N}_2\text{O}_5\text{SSiNa}$   $m/z$   $[\text{M} + \text{Na}]^+$ : 395.1067, found: 395.1064.

### 2-(2-(((*tert*-Butyldimethylsilyl)oxy)ethyl)-1-((4-nitrophenyl)sulfonyl)aziridine (**3t'**)

White solide;  $^1\text{H}$  NMR (400 MHz,  $\text{CDCl}_3$ )  $\delta$  8.38 (d,  $J = 8.4$  Hz, 2H), 8.16 (d,  $J = 8.2$  Hz, 2H), 3.63-3.58 (m, 1H), 3.54-3.50 (m, 1H), 3.03-3.05 (m, 1H), 2.77 (d,  $J = 7.0$  Hz, 1H), 2.23 (d,  $J = 4.4$  Hz, 1H), 1.80-1.75 (m, 1H), 1.63-1.56 (m, 1H), 0.86 (s, 9H), 0.01 (s, 6H);  $^{13}\text{C}$  NMR (100 MHz,  $\text{CDCl}_3$ )  $\delta$  150.5, 144.0, 129.2, 124.2, 60.1, 39.0, 34.4, 34.3, 25.8, 18.1, -5.4, -5.5; HRMS (ESI) calcd for  $\text{C}_{16}\text{H}_{26}\text{N}_2\text{O}_5\text{SSiNa}$   $m/z$   $[\text{M} + \text{Na}]^+$ : 409.1224, found: 409.1235.

**Catalysts 4a,<sup>1</sup> 4l,<sup>1</sup> 4n,<sup>1</sup> 4o,<sup>2</sup> 4p,<sup>1</sup> 8a,<sup>3</sup> 8b,<sup>3</sup> 8c,<sup>4</sup> 8d,<sup>2</sup> S4a,<sup>5</sup> S4b,<sup>6</sup> are known compounds, all catalysts were synthesized according to the report procedure.<sup>1,2,6</sup>**

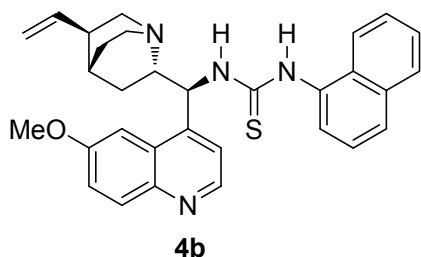

White solide,  $[\alpha]_{20}^D -65.3$  ( $c$  1.0,  $\text{CHCl}_3$ ); IR (KBr): 3441, 2926, 1623, 1510, 1261, 1165, 1030  $\text{cm}^{-1}$ ;  $^1\text{H}$  NMR (400 MHz,  $\text{CDCl}_3$ )  $\delta$  9.30 (s, 1H), 8.27(s, 2H), 7.89-7.87 (m, 3H), 7.50-7.28 (m, 4H), 7.10 (s, 1H), 5.91(s, 1H), 5.57-5.51 (m, 1H), 4.87-4.83 (m, 2H), 4.12-3.88 (m, 3H), 3.25-2.86 (m, 3H), 2.52-2.40 (m, 2H), 2.15 (s, 1H), 2.03 (s, 1H), 1.58-1.50 (m, 3H), 1.26-1.25 (m, 2H), 0.92 (s, 1H);  $^{13}\text{C}$  NMR (100 MHz,  $\text{CDCl}_3$ )  $\delta$  181.8, 157.4, 147.1, 144.4, 140.4, 134.4, 133.2, 131.3, 129.9, 128.1, 126.9, 126.5, 125.3, 125.2, 122.8, 121.6, 114.6, 102.1, 60.2, 55.4, 54.8, 41.1, 38.8, 27.3, 27.0, 20.9, 14.0. HRMS (ESI) calcd for  $\text{C}_{31}\text{H}_{32}\text{N}_4\text{OS}$   $m/z$   $[\text{M} + \text{H}]^+$ : 473.2370, found: 473.2379.

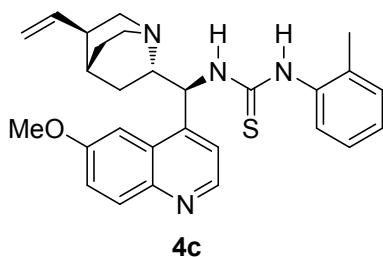

White solide,  $[\alpha]_{20}^D -99.2$  ( $c$ , 1.0  $\text{CHCl}_3$ ); IR (KBr): 3436, 2926, 1734, 1622, 1348, 1166, 1086, 1032  $\text{cm}^{-1}$ ;  $^1\text{H}$  NMR (400 MHz,  $\text{CDCl}_3$ )  $\delta$  9.08 (s, 1H), 8.34 (s, 2H), 7.88 (d,  $J = 9.2$  Hz, 1H), 7.21 (m, 6H), 5.92 (s, 1H), 5.54-5.46 (m, 1H), 4.85-4.79 (m, 2H), 3.85 (s, 3H), 3.28-3.14 (m, 2H), 3.00-2.94 (m, 2H), 2.59-2.52 (m, 2H), 2.15 (s, 1H), 1.96 (s, 3H), 1.59-1.50 (m, 3H), 1.24-1.19 (m, 1H), 0.88-0.85 (m, 1H);  $^{13}\text{C}$  NMR (100 MHz,  $\text{CDCl}_3$ )  $\delta$  180.8, 157.3, 147.1, 144.1, 140.0, 135.7, 134.9, 131.9, 131.0, 130.9, 127.6, 127.3, 126.3, 121.5, 114.6, 102.0, 55.4, 54.5, 53.3, 41.0, 38.5, 26.8, 24.9, 17.4. HRMS (ESI) calcd for  $\text{C}_{28}\text{H}_{33}\text{N}_4\text{OS}$   $m/z$   $[\text{M} + \text{H}]^+$ : 473.2370, found: 473.2381.

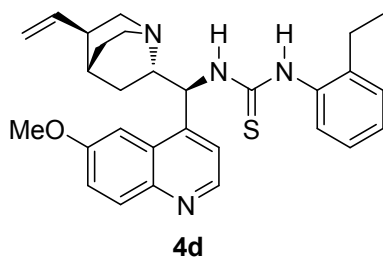

White solide,  $[\alpha]_{20}^D -111.9$  ( $c$ , 1.0  $\text{CHCl}_3$ ); IR (KBr): 3442, 2926, 1622, 1511, 1262, 1166, 1031  $\text{cm}^{-1}$ ;  $^1\text{H}$  NMR (400 MHz,  $\text{CDCl}_3$ )  $\delta$  8.62-8.48 (m, 3H), 7.96 (d,  $J = 9.1$  Hz, 1H), 7.35-7.25 (m, 5H),



5.95 (s, 1H), 5.64-5.55 (m, 1H), 4.94-4.90 (m, 2H), 4.33(s, 1H), 3.94 (s, 3H), 3.34-3.06 (m, 3H), 2.64 (s, 2H), 2.43 (s, 2H), 2.27 (s, 1H), 1.66-1.62 (m, 3H), 1.31-1.23 (m, 2H), 1.04 (s, 3H). <sup>13</sup>C NMR (100 MHz, CDCl<sub>3</sub>) δ 181.3, 157.5, 147.2, 144.3, 140.9, 140.1, 134.0, 131.9, 131.2, 129.1, 128.0, 126.5, 121.7, 114.9, 102.1, 61.1, 60.3, 55.5, 54.7, 40.9, 38.7, 27.0, 26.9, 25.2, 24.0, 14.0. HRMS (ESI) calcd for C<sub>29</sub>H<sub>35</sub>N<sub>4</sub>OS *m/z* [M + H]<sup>+</sup>: 487.2526, found: 487.2532.

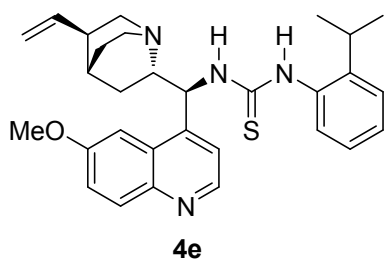

White solide, [α]<sub>20</sub> D -128.7 (*c*, 1.0 CHCl<sub>3</sub>); IR (KBr): 3422, 2926, 1735, 1622, 1512, 1262, 1084, 1031 cm<sup>-1</sup>; <sup>1</sup>H NMR (400 MHz, CDCl<sub>3</sub>) δ 8.51 (s, 1H), 8.16 (s, 1H), 7.89 (d, *J* = 8.5 Hz, 1H), 7.9-7.16 (m, 6H), 5.73 (s, 1H), 5.53-5.50 (m, 1H), 4.85-4.80 (m, 2H), 4.02-4.04(m, 1H), 3.85 (m, 3H), 3.16-2.98 (m, 4H), 2.56-2.50 (m, 2H), 2.17 (s, 1H), 1.95 (s, 2H), 1.57 (s, 3H), 1.22-0.94 (m, 6H); <sup>13</sup>C NMR (100 MHz, CDCl<sub>3</sub>) δ 181.6, 157.4, 147.2, 145.9, 144.4, 140.5, 133.9, 132.0, 131.9, 131.3, 128.5, 128.3, 126.5, 121.6, 114.6, 102.2, 60.2, 56.3, 55.5, 55.0, 40.9, 39.0, 27.9, 27.4, 27.0, 26.8, 23.3, 22.8, 14.0. HRMS (ESI) calcd for C<sub>30</sub>H<sub>36</sub>N<sub>4</sub>OSNa *m/z* [M + Na]<sup>+</sup>: 523.2513, found: 523.2502.

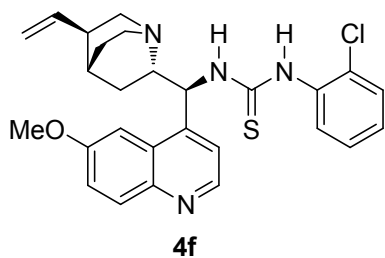

White solide, [α]<sub>20</sub> D -81.0 (*c*, 1.0 CHCl<sub>3</sub>); IR (KBr): 3447, 2925, 1624, 1511, 1470, 1262, 1031 cm<sup>-1</sup>; <sup>1</sup>H NMR (400 MHz, CDCl<sub>3</sub>) δ 8.99 (s, 1H), 8.53 (s, 1H), 7.98 (d, *J* = 9.1 Hz, 1H), 7.79 (s, 1H), 7.62 (d, *J* = 7.6 Hz, 1H), 7.40-7.16 (m, 5H), 5.95 (s, 1H), 5.66-5.57 (m, 1H), 4.97-4.92 (m, 2H), 3.95 (s, 3H), 3.45-3.11 (m, 3H), 2.68 (d, *J* = 7.6 Hz, 2H), 2.30 (s, 1H), 1.99 (s, 1H), 1.69-1.64 (m, 3H), 1.37-1.25 (m, 1H), 1.01-0.98 (m, 1H); <sup>13</sup>C NMR (100 MHz, CDCl<sub>3</sub>) δ 181.2, 157.7, 147.4, 144.6, 139.9, 135.0, 131.4, 129.9, 129.7, 128.0, 127.5, 127.1, 126.5, 121.8, 115.1, 102.1, 60.2, 55.6, 54.7, 41.1, 38.6, 27.5, 27.0, 26.9; HRMS (ESI) calcd for C<sub>27</sub>H<sub>30</sub>ClN<sub>4</sub>OSNa *m/z* [M + H]<sup>+</sup>: 493.1823, found: 493.1821.

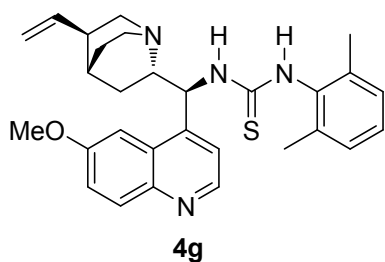

White solide,  $[\alpha]_{20}^D -86.9$  (*c*, 1.0 CHCl<sub>3</sub>); IR (KBr): 3440, 2924, 1737, 1623, 1510, 1466, 1381, 1228, 1166 cm<sup>-1</sup>; <sup>1</sup>H NMR (400 MHz, CDCl<sub>3</sub>)  $\delta$  8.66-8.53 (m, 2H), 7.91 (d, *J* = 8.9 Hz, 1H), 7.44-6.8 (m, 5H), 5.78-5.57 (m, 2H), 4.88-4.84 (m, 2H), 4.13-3.97 (m, 4H), 3.14-3.03 (m, 2H), 2.72-2.63 (m, 2H), 2.33-2.03 (m, 9H), 1.65-1.61 (m, 3H), 1.26-1.22 (m, 2H), 0.97 (s, 1H); <sup>13</sup>C NMR (100 MHz, CDCl<sub>3</sub>)  $\delta$  180.6, 170.9, 157.4, 147.1, 144.3, 140.9, 137.3, 136.9, 133.3, 131.9, 131.8, 128.7, 128.5, 128.4, 128.2, 114.3, 102.2, 60.1, 55.5, 40.9, 39.2, 27.7, 27.0, 20.8, 18.1, 17.6, 14.0; HRMS (ESI) calcd for C<sub>29</sub>H<sub>35</sub>N<sub>4</sub>OS *m/z* [M + H]<sup>+</sup>: 487.2526, found: 487.2524.

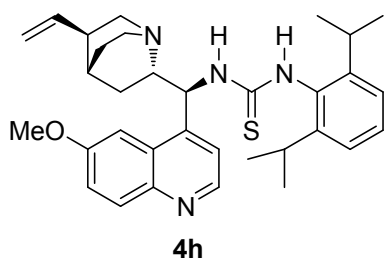

White solide,  $[\alpha]_{20}^D -58.1$  (*c*, 1.0 CHCl<sub>3</sub>); IR (KBr): 3439, 2961, 1622, 1511, 1263, 1083, 1032 cm<sup>-1</sup>; <sup>1</sup>H NMR (400 MHz, CDCl<sub>3</sub>)  $\delta$  8.76-8.66 (m, 1H), 7.98-7.93 (m, 2H), 7.38-7.22 (m, 5H), 7.03 (d, *J* = 7.5 Hz, 2H), 6.80 (d, *J* = 7.5 Hz, 1H), 6.48 (s, 1H), 5.94 (s, 1H), 5.66-5.56 (m, 1H), 4.90-4.85 (m, 1H), 3.99 (s, 6H), 3.22-3.18 (m, 2H), 2.96-2.61 (m, 3H), 1.60-1.16 (m, 16H); <sup>13</sup>C NMR (100 MHz, CDCl<sub>3</sub>)  $\delta$  181.2, 157.7, 147.8, 147.5, 147.1, 144.4, 141.0, 140.1, 132.3, 131.2, 129.7, 128.7, 124.1, 123.9, 123.5, 122.6, 121.9, 118.7, 118.4, 114.3, 102.4, 61.2, 55.7, 40.9, 39.3, 28.6, 28.2, 27.8, 25.0, 24.8, 24.5, 24.3, 22.3; HRMS (ESI) calcd for C<sub>33</sub>H<sub>43</sub>N<sub>4</sub>OS *m/z* [M + H]<sup>+</sup>: 543.3152, found: 543.3154.

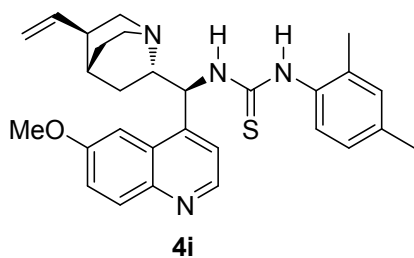

White solide,  $[\alpha]_{20}^D -100.4$  (*c*, 2.6 CHCl<sub>3</sub>); IR (KBr): 3258, 2925, 1736, 1621, 1510, 1228, 1084, 1031 cm<sup>-1</sup>; <sup>1</sup>H NMR (400 MHz, CDCl<sub>3</sub>)  $\delta$  8.85 (s, 1H), 8.33 (s, 1H), 7.88 (d, *J* = 9.0 Hz, 1H), 7.26-6.98 (m, 5H), 5.57-5.49 (m, 1H), 4.86-4.80 (m, 2H), 4.00-3.86 (m, 3H), 3.23-2.94 (m, 3H), 2.53 (s, 2H), 2.26-2.15 (m, 4H), 2.07-1.94 (m, 4H), 1.55 (m, 3H), 1.19-1.16 (m, 2H), 0.88-0.78 (m, 2H); <sup>13</sup>C NMR (100 MHz, CDCl<sub>3</sub>)  $\delta$  181.1, 157.5, 147.3, 144.4, 140.6, 137.6, 135.1, 132.9, 132.0, 131.7, 131.3, 127.6, 127.3, 114.6, 102.2, 60.3, 55.5, 55.0, 41.1, 39.0, 27.4, 27.1, 21.0, 17.5, 14.1; HRMS (ESI) calcd for C<sub>29</sub>H<sub>35</sub>N<sub>4</sub>OS *m/z* [M + H]<sup>+</sup>: 487.2526, found: 487.2536.

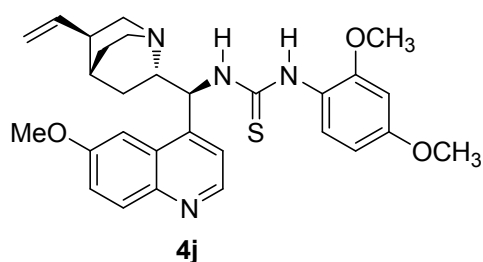

White solide,  $[\alpha]_{20}^D -104.2$  (*c*, 2.3 CHCl<sub>3</sub>); IR (KBr): 3278, 2936, 1619, 1510, 1209, 1166, 1033 cm<sup>-1</sup>; <sup>1</sup>H NMR (400 MHz, CDCl<sub>3</sub>)  $\delta$  8.57-8.39 (m, 2H), 7.97-7.93 (m, 2H), 7.38 (s, 3H), 6.43 (s, 2H), 6.2 (s, 1H), 5.63-5.32 (m, 2), 4.95 (s, 2H), 4.10 (s, 3H), 3.96 (s, 3H), 3.78 (s, 3H), 3.47 (s, 1H), 3.24 (s, 1H), 2.78 (s, 2H), 2.36 (s, 1H), 2.03-1.72 (m, 2H), 1.80 (m, 2H), 1.39-1.26 (m, 2H), 1.02 (s, 1H); <sup>13</sup>C NMR (100 MHz, CDCl<sub>3</sub>)  $\delta$  181.0, 158.9, 157.6, 153.9, 147.2, 144.3, 139.3, 131.0, 128.0, 127.5, 121.8, 119.3, 115.2, 103.7, 102.3, 98.8, 60.1, 55.5, 55.2, 55.1, 54.3, 41.1, 38.1, 26.9, 26.3, 24.8, 23.4; HRMS (ESI) calcd for C<sub>29</sub>H<sub>35</sub>N<sub>4</sub>O<sub>3</sub>S *m/z* [M + H]<sup>+</sup>: 519.2424, found: 519.2538.

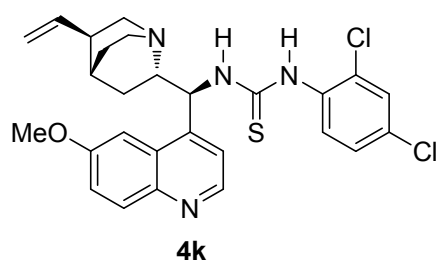

White solide,  $[\alpha]_{20}^D -83.4$  (*c*, 4.6 CHCl<sub>3</sub>); IR (KBr): 3238, 2927, 1733, 1621, 1528, 1228, 1167, 1098 cm<sup>-1</sup>; <sup>1</sup>H NMR (400 MHz, CDCl<sub>3</sub>)  $\delta$  8.57 (s, 1H), 7.98 (d, *J* = 9.1 Hz, 1H), 7.82 (s, 1H), 7.64 (d, *J* = 8.2 Hz, 1H), 7.44-7.34 (m, 3H), 7.19 (d, *J* = 8.2 Hz, 1H), 6.09 (s, 1H), 5.64-5.58 (m, 1H), 4.99-4.93 (m, 2H), 4.12-4.08 (m, 1H), 4.06 (s, 2H), 3.96 (s, 2H), 3.40 (s, 2H), 3.19-3.13 (m, 1H), 2.72 (s, 2H), 2.31 (s, 1H), 2.02 (d, *J* = 10.2 Hz, 1H), 1.70 (s, 2H), 1.37-1.23 (m, 2H), 0.97 (s, 1H); <sup>13</sup>C NMR (101 MHz, CDCl<sub>3</sub>)  $\delta$  181.2, 157.7, 147.2, 144.34 (s), 139.5, 134.0, 131.8, 131.2, 130.0, 129.3, 128.5,

127.9, 127.1, 121.8, 115.2, 102.1, 60.2, 55.5, 54.5, 41.1, 38.3, 26.8, 26.6, 24.9, 24.0, 14.0; HRMS (ESI) calcd for  $C_{27}H_{29}Cl_2N_4OS$   $m/z$   $[M + H]^+$ : 527.1434, found: 527.1423.

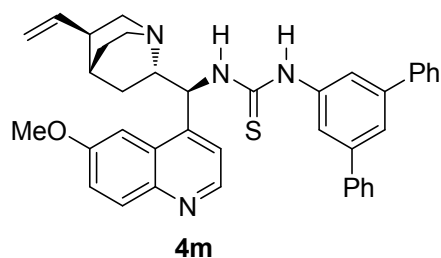

White solide,  $[\alpha]_{20}^D -173.7$  ( $c$ , 1.0  $CHCl_3$ ); IR (KBr): 3235, 2926, 1732, 1620, 1527, 1166, 1099  $cm^{-1}$ ;  $^1H$  NMR (400 MHz,  $CDCl_3$ )  $\delta$  9.44 (s, 1H), 8.40 (s, 2H), 7.96 (d,  $J = 9.2$  Hz, 1H), 7.85-7.25 (m, 12H), 7.08 (s, 1H), 6.09 (s, 1H), 5.64-5.55 (m, 1H), 4.93-4.89 (m, 2H), 4.12-4.10 (q, 1H), 3.94 (s, 3H), 3.49 (s, 1H), 3.21 (s, 1H), 2.90 (s, 1H), 2.66 (d,  $J = 9.1$  Hz, 2H), 2.23-2.15 (m, 2H), 1.63-1.58 (m, 2H), 1.29-1.23 (m, 2H), 0.92-0.85 (m, 2H);  $^{13}C$  NMR (100 MHz,  $CDCl_3$ )  $\delta$  180.2, 157.7, 147.4, 144.6, 142.9, 140.5, 134.0, 138.4, 131.5, 128.8, 127.7, 127.1, 123.7, 122.8, 121.8, 114.8, 102.3, 60.3, 55.7, 54.9, 41.6, 38.9, 27.6, 27.4, 27.2, 25.4, 21.0, 15.4, 14.1; HRMS (ESI) calcd for  $C_{39}H_{39}N_4OS$   $m/z$   $[M + H]^+$ : 611.2839, found: 611.2852.

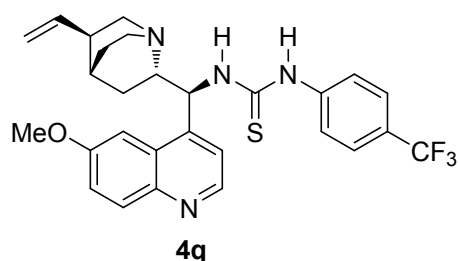

White solide,  $[\alpha]_{20}^D -122.4$  ( $c$ , 1.5  $CHCl_3$ ); IR (KBr): 3425, 2926, 1736, 1621, 1513, 1324, 1262, 1119, 1067  $cm^{-1}$ ;  $^1H$  NMR (400 MHz,  $CDCl_3$ )  $\delta$  8.59 (s, 1H), 7.98 (d,  $J = 8.9$  Hz, 1H), 7.78 (s, 1H), 7.55-7.26 (m, 6H), 6.08 (s, 1H), 5.67-5.61 (m, 1H), 4.98-4.96 (m, 2H), 3.95 (s, 3H), 3.47-3.38 (m, 2H), 3.20-3.14 (m, 1H), 2.34 (s, 2H), 2.34 (s, 1H), 1.72 (s, 4H), 1.39-1.37 (m, 1H), 0.96 (d,  $J = 7.6$  Hz, 1H);  $^{13}C$  NMR (100 MHz,  $CDCl_3$ )  $\delta$  180.3, 158.0, 147.5, 144.7, 141.3, 139.8, 131.6, 128.0, 126.3, 125.2, 123.6, 122.5, 122.1, 115.4, 102.2, 55.7, 54.78, 41.5, 38.6, 37.9, 37.9, 27.0, 26.9, 25.2, 24.2; HRMS (ESI) calcd for  $C_{28}H_{30}F_3N_4OS$   $m/z$   $[M + H]^+$ : 527.2087, found: 527.2101.

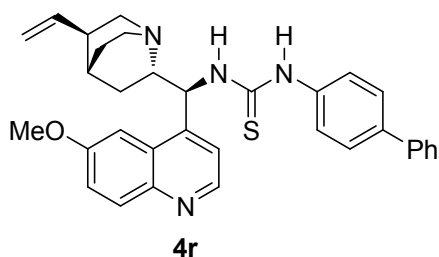

White solide,  $[\alpha]_{20}^D -158.1$  (*c*, 1.0 CHCl<sub>3</sub>); IR (KBr): 3441, 2924, 1736, 1621, 1512, 1379, 1229, 1164, 1083 cm<sup>-1</sup>; <sup>1</sup>H NMR (400 MHz, CDCl<sub>3</sub>)  $\delta$  9.69 (s, 1H), 8.79 (s, 1H), 8.40 (d, *J* = 90.0 Hz, 1H), 7.97 (s, 2H), 7.54-7.33 (m, 10H), 6.23 (s, 1H), 5.59-5.57 (m, 1H), 4.94-4.89 (m, 2H), 3.95 (s, 3H), 3.57-3.40 (m, 2H), 3.16 (s, 1H), 2.75 (s, 2H), 2.26 (s, 1H), 1.95 (s, 1H), 1.71-1.63 (m, 3H), 1.32 (s, 2H), 0.94-0.85 (m, 1H); <sup>13</sup>C NMR (100 MHz, CDCl<sub>3</sub>)  $\delta$  180.0, 157.6, 147.2, 144.3, 139.7, 138.3, 137.0, 131.0, 128.5, 128.0, 127.4, 127.0, 126.5, 126.3, 124.6, 121.8, 114.9, 102.2, 55.4, 54.4, 41.3, 38.3, 26.8, 26.7, 24.9, 23.9; HRMS (ESI) calcd for C<sub>33</sub>H<sub>35</sub>N<sub>4</sub>OS *m/z* [M + H]<sup>+</sup>: 535.2526, found: 535.2531.

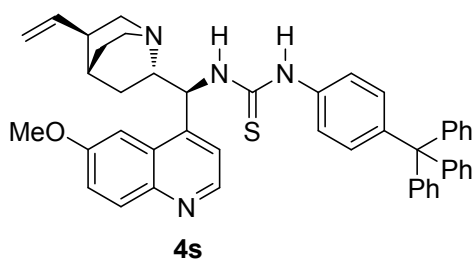

White solide,  $[\alpha]_{20}^D -141.2$  (*c*, 1.0 CHCl<sub>3</sub>); IR (KBr): 3266, 2926, 1734, 1620, 1510 cm<sup>-1</sup>; <sup>1</sup>H NMR (400 MHz, CDCl<sub>3</sub>)  $\delta$  9.23 (s, 1H), 8.45 (s, 1H), 7.94 (d, *J* = 9.1 Hz, 1H), 7.76 (s, 1H), 7.43-7.20 (m, 19H), 7.11 (d, *J* = 8.3 Hz, 2H), 5.85 (s, 1H), 5.68-5.60 (m, 1H), 4.97-4.91 (m, 2H), 3.88 (s, 3H), 3.26-2.98 (m, 3H), 2.65-2.57 (m, 2H), 2.24 (s, 1H), 1.63-1.55 (m, 3H), 1.31-1.16 (m, 3H), 0.94-0.85 (m, 2H); <sup>13</sup>C NMR (100 MHz, CDCl<sub>3</sub>)  $\delta$  180.2, 157.5, 147.3, 146.3, 144.8, 144.4, 140.7, 135.3, 131.8, 131.3, 130.8, 127.4, 125.9, 123.7, 121.7, 114.6, 102.1, 64.5, 60.2, 55.5, 55.0, 41.1, 39.1, 27.0, 20.9, 18.3, 14.0; HRMS (ESI) calcd for C<sub>46</sub>H<sub>46</sub>N<sub>4</sub>OS *m/z* [M + H]<sup>+</sup>: 701.3309 found: 701.3322.

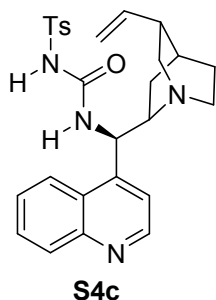

White solide,  $[\alpha]_{20}^D +89.3$  (*c*, 1.0 CHCl<sub>3</sub>); <sup>1</sup>H NMR (400 MHz, CDCl<sub>3</sub>) δ 8.58 (s, 1H), 8.17-8.12 (m, 2H), 7.75-7.41 (m, 5H), 7.16-7.02 (m, 2H), 6.06-5.71 (m, 5H), 5.18-5.10 (m, 2H), 4.11-3.94 (m, 1H), 3.52-3.16 (m, 2H), 2.71-2.68 (m, 1H), 2.30 (s, 3H), 1.66 (s, 2H), 1.57-1.26 (m, 2H), 0.94-0.91 (m, 2H); <sup>13</sup>C NMR (100 MHz, CDCl<sub>3</sub>) δ 160.0, 149.9, 147.8, 145.3, 141.5, 140.5, 137.4, 129.0, 128.4, 126.6, 126.5, 125.8, 124.0, 123.4, 119.1, 116.1, 59.5, 48.3, 46.1, 45.5, 45.0, 37.0, 26.5, 24.3, 21.1, 8.3; HRMS (ESI) calcd for C<sub>27</sub>H<sub>31</sub>N<sub>4</sub>O<sub>3</sub>S *m/z* [M + H]<sup>+</sup>: 491.2111, found: 491.2104.

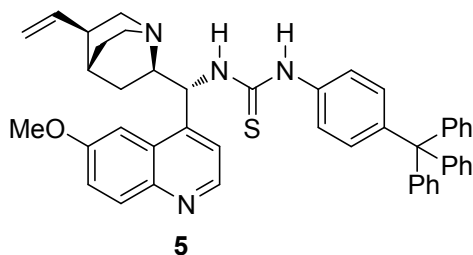

White solide,  $[\alpha]_{20}^D +188.8$  (*c*, 1.0 CHCl<sub>3</sub>); IR (KBr): 3271, 2926, 1735, 1621, 1508, 1320, 1227, 1082, 1031 cm<sup>-1</sup>; <sup>1</sup>H NMR (400 MHz, CDCl<sub>3</sub>) δ 8.61 (s, 1H), 7.98 (d, *J* = 9.0 Hz, 1H), 7.60 (s, 1H), 7.35-7.13 (m, 18H), 5.94-5.85 (m, 1H), 5.62 (s, 1H), 5.16-5.12 (m, 2H), 3.90 (s, 3H), 3.48 (s, 2H), 2.95-2.76 (m, 4H), 2.28-2.17 (m, 2H), 1.65-1.13 (m, 8H), 0.87-0.85 (m, 1H). <sup>13</sup>C NMR (100 MHz, CDCl<sub>3</sub>) δ 180.3, 157.5, 147.3, 146.3, 144.9, 144.4, 139.9, 135.2, 131.9, 130.9, 127.5, 125.9, 122.9, 123.7, 122.1, 114.9, 101.7, 64.6, 55.4, 50.3, 48.5, 47.0, 38.8, 27.0, 26.2, 22.5, 11.3; HRMS (ESI) calcd for C<sub>46</sub>H<sub>46</sub>N<sub>4</sub>OS *m/z* [M + H]<sup>+</sup>: 701.3309, found: 701.3327.

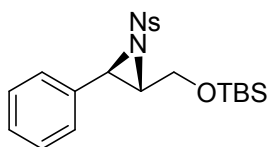

**(2*S*, 3*R*)-2-(((*tert*-Butyldimethylsilyloxy)methyl)-1-((4-nitrophenyl)sulfonyl)-3-phenylaziridine (9)**

Colourless oil,  $[\alpha]_{20}^D -11.3$  (*c* 1.7, CHCl<sub>3</sub>, 99% ee) IR (KBr): 2926, 1737, 1622, 1532, 1463, 1379, 1165 cm<sup>-1</sup>; <sup>1</sup>H NMR (400 MHz, CDCl<sub>3</sub>) δ 8.30 (d, *J* = 8.6 Hz, 2H), 8.12 (d, *J* = 8.6 Hz, 2H), 7.19-7.29 (m, 5H), 4.31 (dd, *J* = 11.3, 5.4 Hz, 1H), 4.16 (dd, *J* = 11.2, 5.6 Hz, 1H), 3.99 (d, *J* = 4.2 Hz, 1H), 3.25 (dd, *J* = 5.6, 4.2 Hz, 1H), 0.90 (s, 9H), 0.10 (s, 6H); <sup>13</sup>C NMR (100 MHz, CDCl<sub>3</sub>) δ 150.2, 145.9, 133.7, 128.7, 128.6, 128.5, 126.8, 124.1, 60.6, 53.2, 47.8, 25.8, 18.3, -5.3, -5.4. HRMS (ESI) calcd for C<sub>21</sub>H<sub>28</sub>N<sub>2</sub>O<sub>5</sub>SSiNa *m/z* [M + Na]<sup>+</sup>: 471.1380, found: 471.1385; HPLC (Daicel Chiralpak IA, *i*-PrOH/hexane = 8/92, 1.0 mL/min, 254 nm) *t*<sub>1</sub> = 11.0 min (major), *t*<sub>2</sub> = 12.4 min (minor).

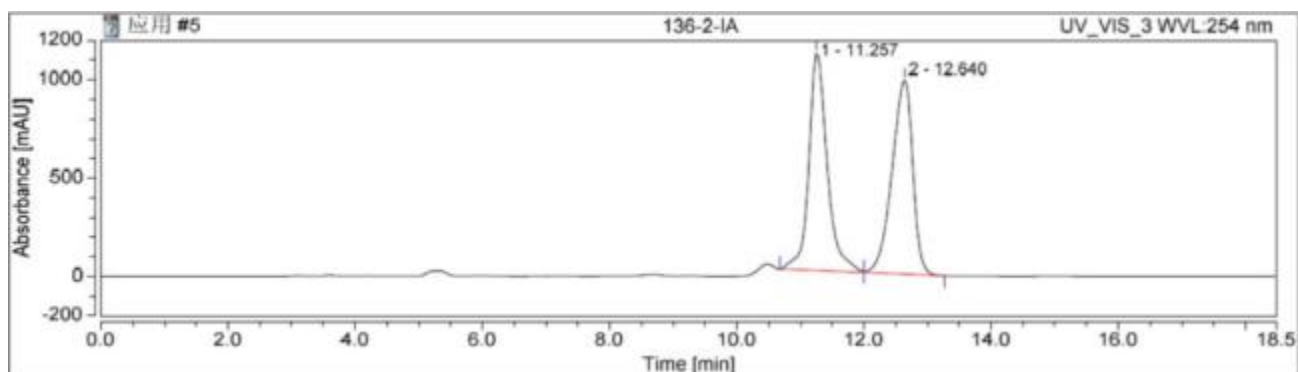

| Integration Results |           |                    |              |            |                 |                   |             |
|---------------------|-----------|--------------------|--------------|------------|-----------------|-------------------|-------------|
| No.                 | Peak Name | Retention Time min | Area mAU*min | Height mAU | Relative Area % | Relative Height % | Amount n.a. |
| 1                   |           | 11.257             | 370.323      | 1108.454   | 49.86           | 52.90             | n.a.        |
| 2                   |           | 12.640             | 372.358      | 986.794    | 50.14           | 47.10             | n.a.        |
| Total:              |           |                    | 742.681      | 2095.249   | 100.00          | 100.00            |             |

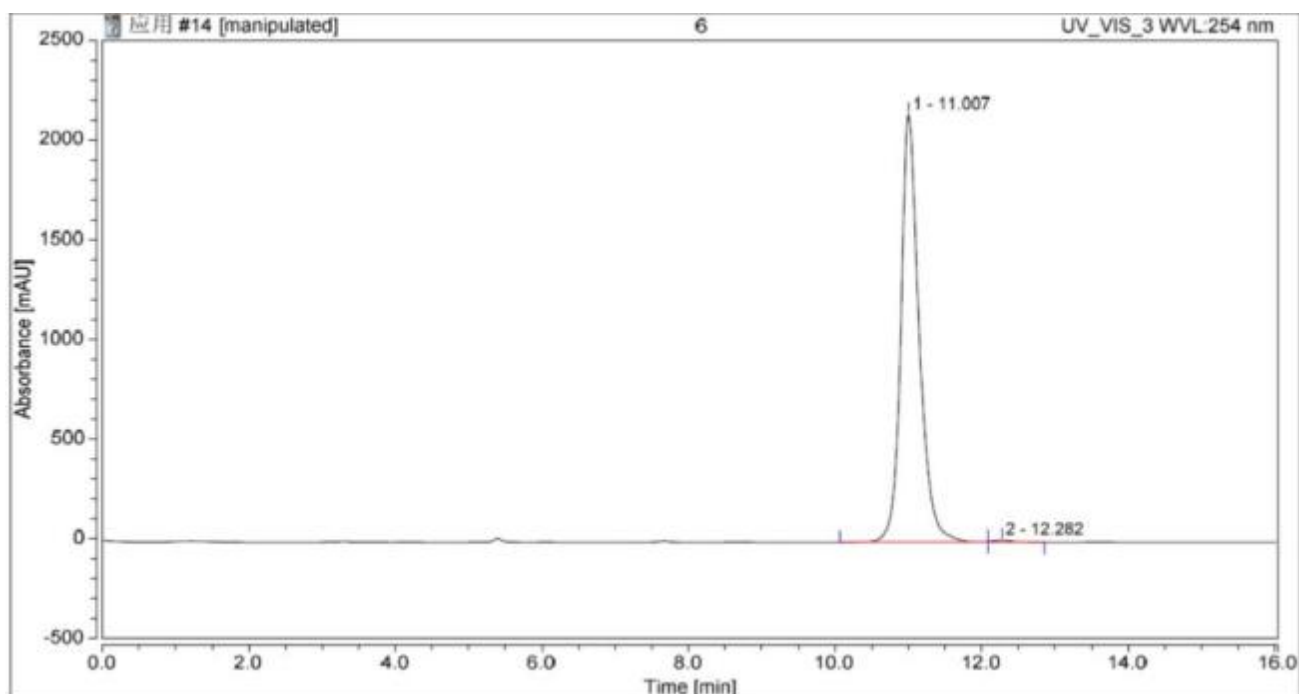

| Integration Results |           |                    |              |            |                 |                   |             |
|---------------------|-----------|--------------------|--------------|------------|-----------------|-------------------|-------------|
| No.                 | Peak Name | Retention Time min | Area mAU*min | Height mAU | Relative Area % | Relative Height % | Amount n.a. |
| 1                   |           | 11.007             | 623.841      | 2145.463   | 99.44           | 99.47             | n.a.        |
| 2                   |           | 12.282             | 3.492        | 11.470     | 0.56            | 0.53              | n.a.        |
| Total:              |           |                    | 627.333      | 2156.933   | 100.00          | 100.00            |             |

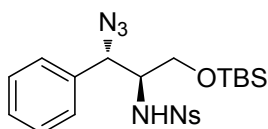

***(1S,2S)*-N-1-Azido-3-((*tert*-butyldimethylsilyl)oxy)-1-phenylpropan-2-yl)-4-nitrobenzenesulfonamide (10)**

White solide,  $[\alpha]_{20}^D +52.8$  ( $c$  1.5,  $\text{CHCl}_3$ , 98% ee) IR (KBr): 3443, 2927, 2105, 1531, 1463, 1348, 1255, 1165  $\text{cm}^{-1}$ ;  $^1\text{H}$  NMR (400 MHz,  $\text{CDCl}_3$ )  $\delta$  8.11 (d,  $J = 8.5$  Hz, 2H), 7.66 (d,  $J = 8.6$  Hz, 2H), 7.10-7.21 (m, 5H), 5.00 (d,  $J = 9.2$  Hz, 1H), 4.60 (d,  $J = 8.3$  Hz, 1H), 3.96-3.98 (m, 1H), 3.65-3.53 (m, 2H), 0.91 (s, 9H), 0.09 (s, 3H), 0.08 (s, 3H);  $^{13}\text{C}$  NMR (100 MHz,  $\text{CDCl}_3$ )  $\delta$  149.6, 145.9, 136.0, 128.8, 128.7, 127.9, 127.6, 124.0, 65.0, 62.0, 59.1, 25.8, 18.3, -5.5, -5.6. HRMS (ESI) calcd for  $\text{C}_{21}\text{H}_{29}\text{N}_5\text{O}_5\text{SSiNa}$   $m/z$   $[\text{M} + \text{Na}]^+$ : 514.1551, found: 514.1568; HPLC (Daicel Chiralpak IA, *i*-PrOH/hexane = 8/92, 1.0 mL/min, 254 nm)  $t_1 = 7.6$  min (major),  $t_2 = 8.3$  min (minor).

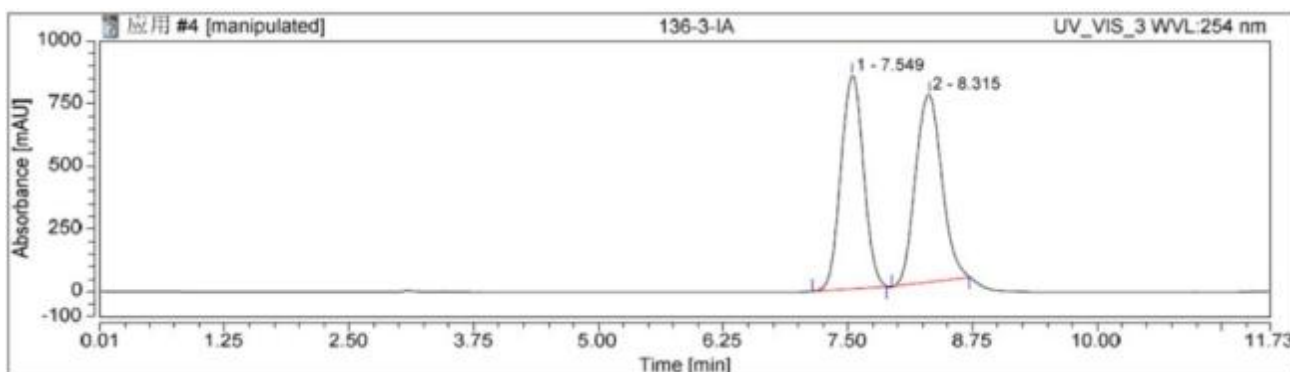

#### Integration Results

| No.    | Peak Name | Retention Time min | Area mAU*min | Height mAU | Relative Area % | Relative Height % | Amount n.a. |
|--------|-----------|--------------------|--------------|------------|-----------------|-------------------|-------------|
| 1      |           | 7.549              | 224.920      | 850.999    | 49.51           | 53.22             | n.a.        |
| 2      |           | 8.315              | 229.402      | 748.039    | 50.49           | 46.78             | n.a.        |
| Total: |           |                    | 454.322      | 1599.037   | 100.00          | 100.00            |             |

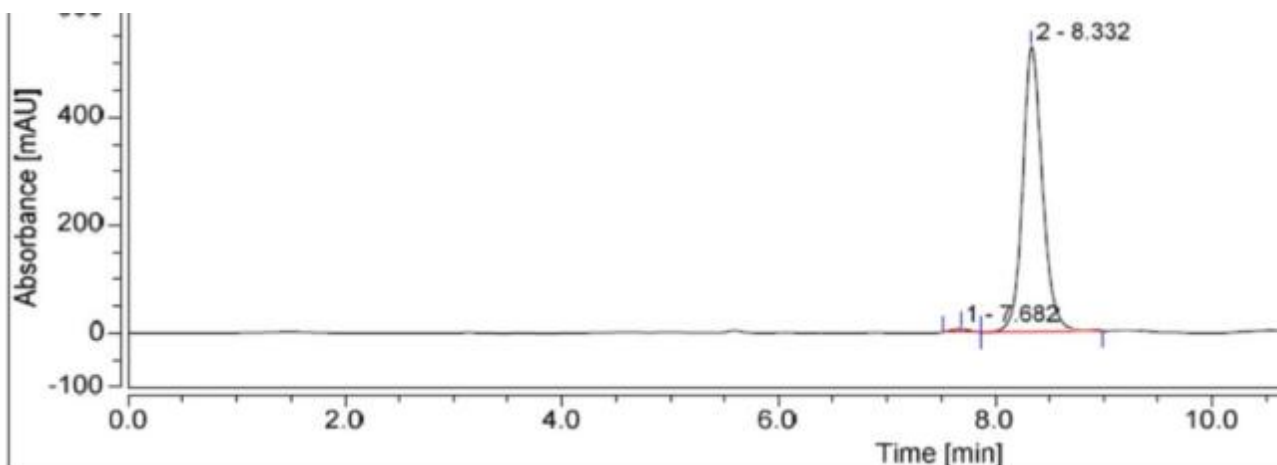

#### Integration Results

| No.    | Peak Name | Retention Time min | Area mAU*min | Height mAU | Relative Area % | Relative Height % | Amount n.a. |
|--------|-----------|--------------------|--------------|------------|-----------------|-------------------|-------------|
| 1      |           | 7.682              | 1.156        | 5.852      | 1.01            | 1.10              | n.a.        |
| 2      |           | 8.332              | 113.275      | 528.330    | 98.99           | 98.90             | n.a.        |
| Total: |           |                    | 114.431      | 534.182    | 100.00          | 100.00            |             |



## Reference

- (1) X. Li, H. Deng, B. Zhang, J. Li, L. Zhang, S. Luo and J.-P. Cheng, *Chem. Eur. J.*, 2010, **16**, 450.
- (2) J. Xu, Y. Hu, D. Huang, K.-H. Wang, C. Xu and T. Niu, *Adv. Synth. Catal.*, 2012, **354**, 515
- (3) L. Zhou, C. K. Tan, X. Jiang, F. Chen and Y.-Y. Yeung, *J. Am. Chem. Soc.*, 2010, **132**, 15474.
- (4) J. Ye, D. J. Dixon and P. S. Hynes, *Chem. Commun.*, 2005, 4481
- (5) Z.-q. Zhou,; L.-h. Wu and Y. Liu, *Huaxue Shiji*, 2008, **30**, 729.
- (6) E.-M. Tanzer, W. B. Schweizer, M.-O. Ebert and R. Gilmour, *Chem. Eur. J.*, 2012, **18**, 2006

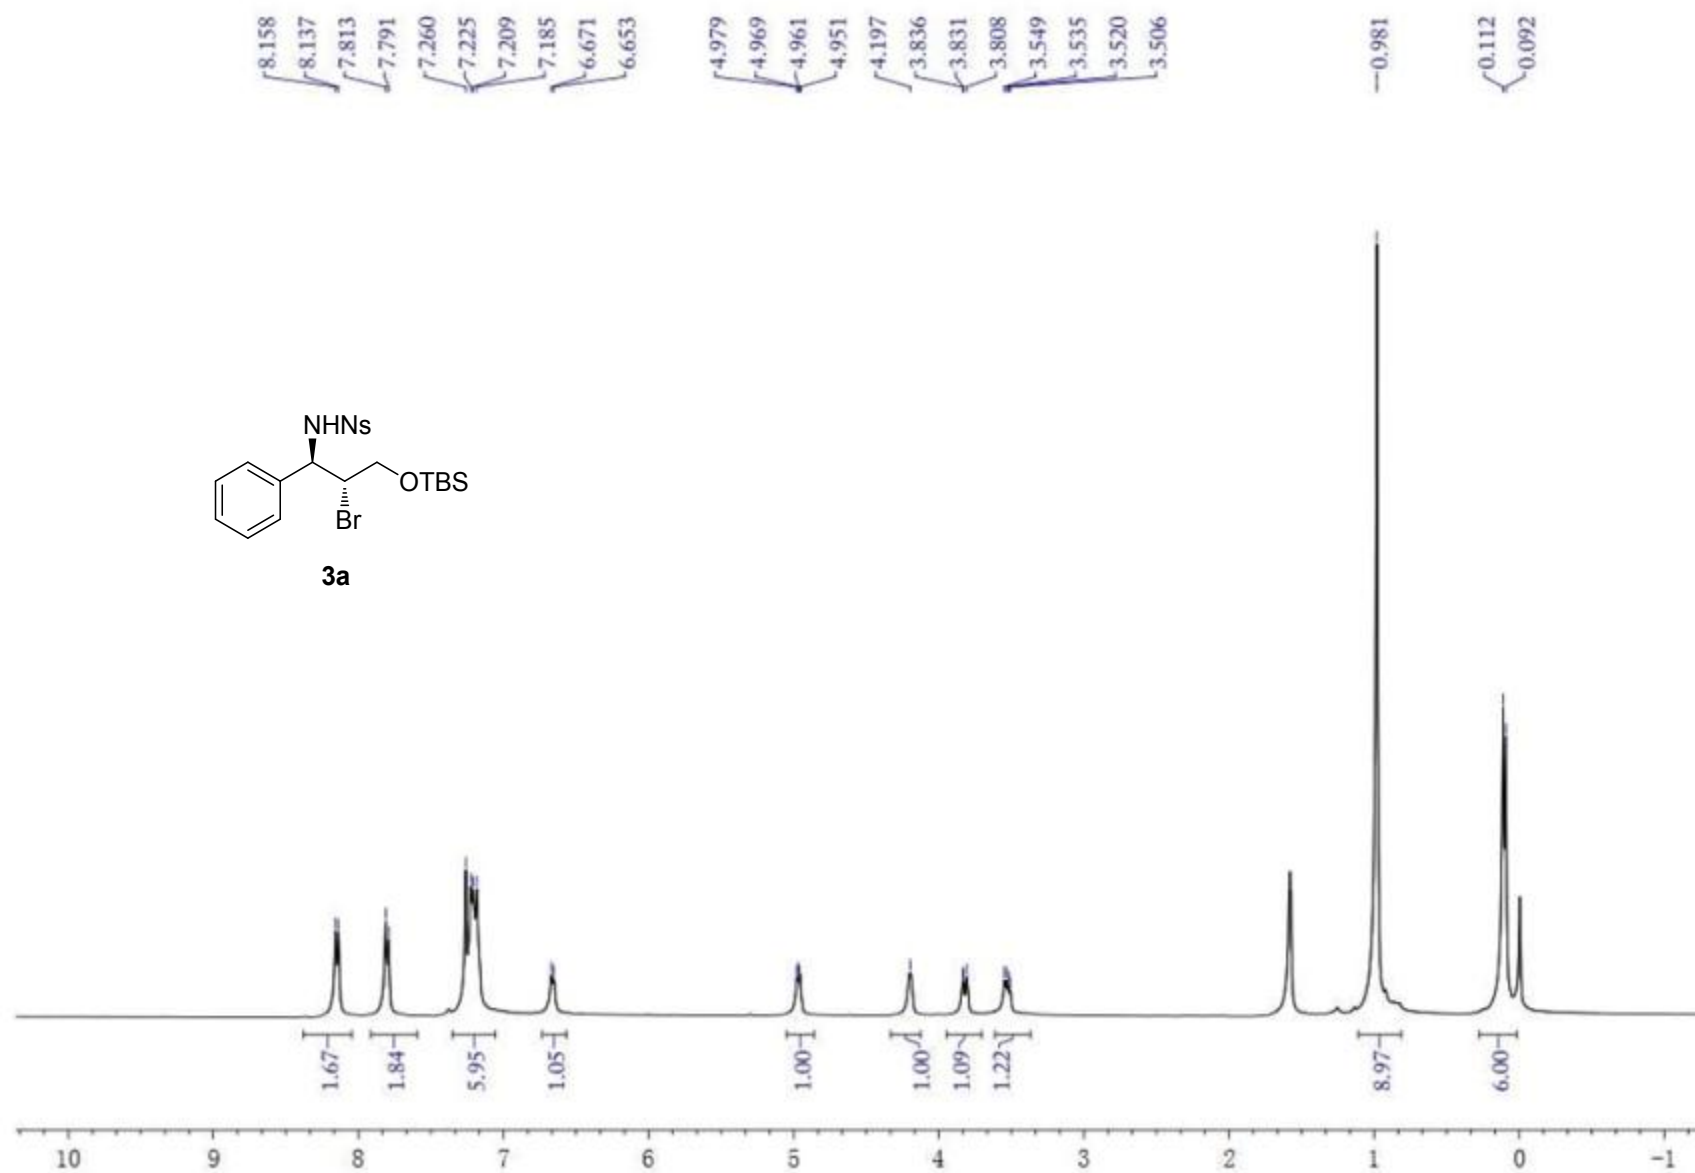

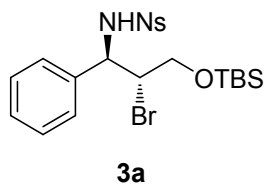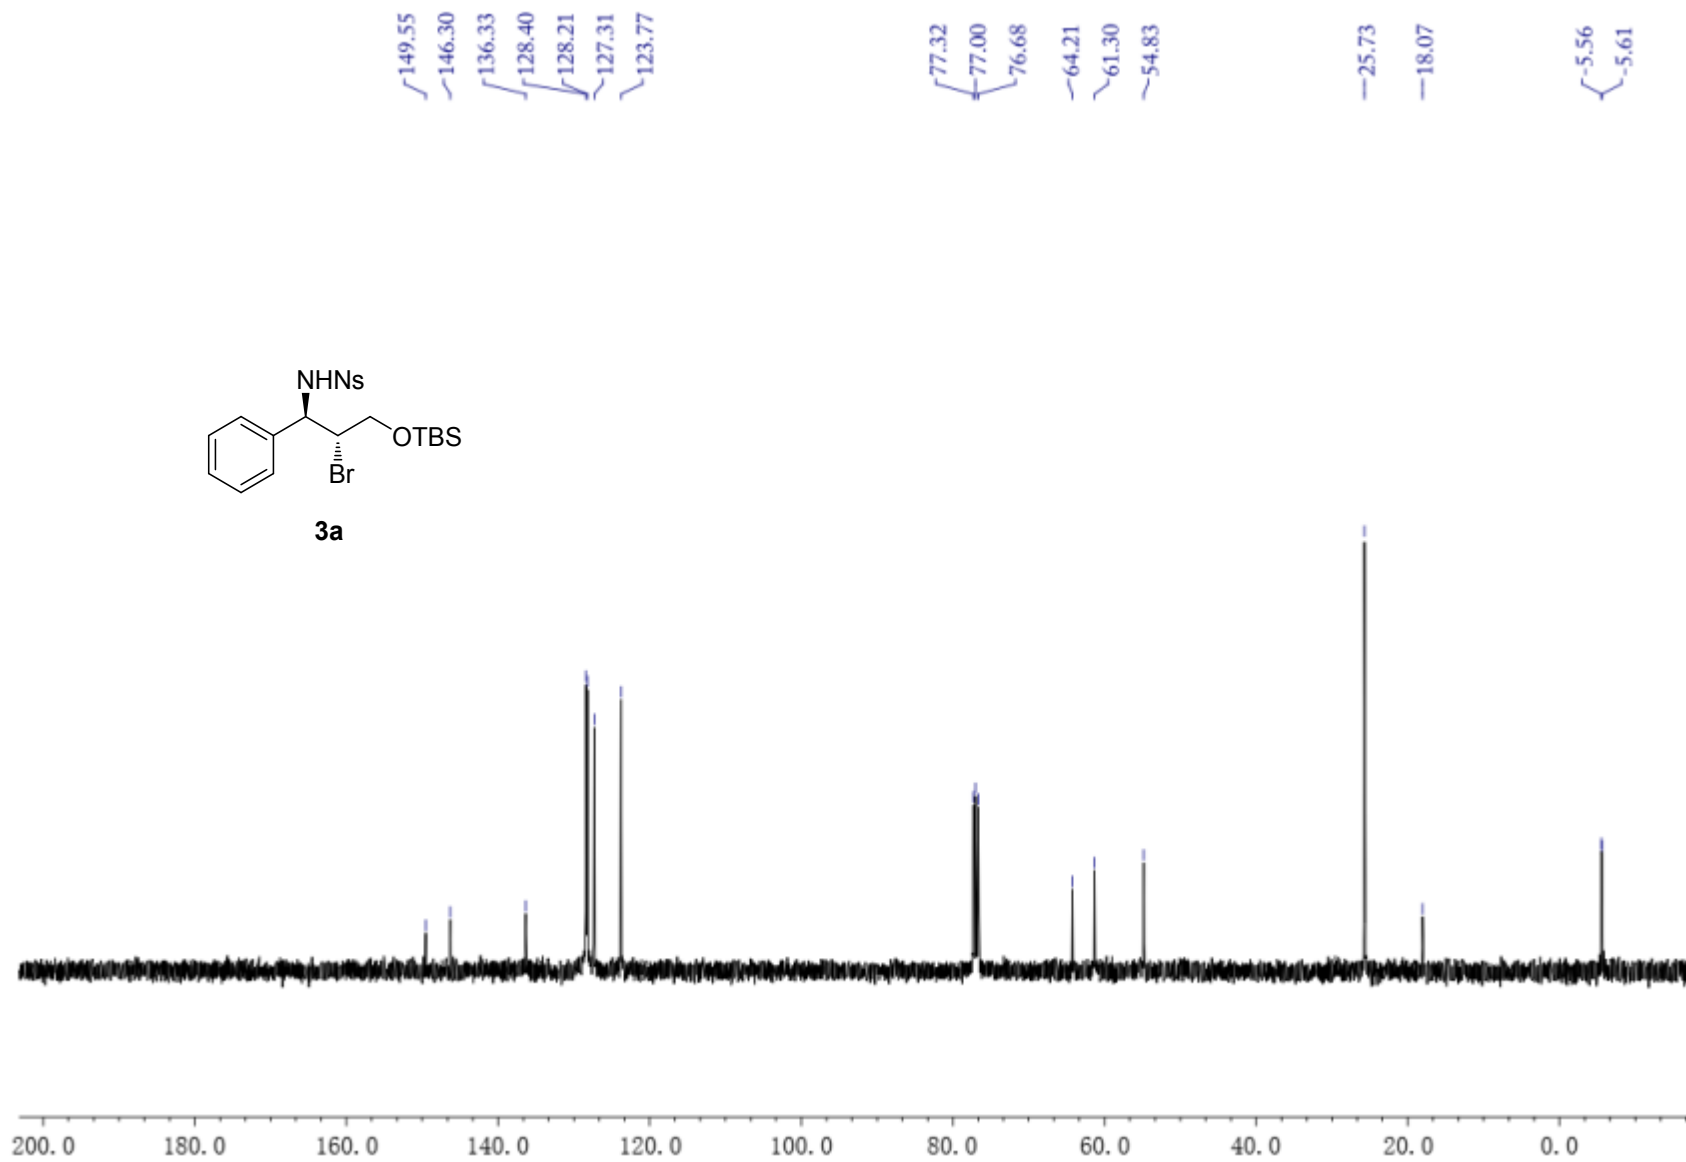

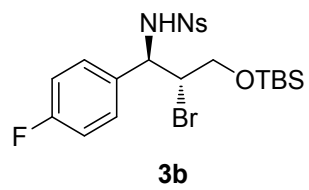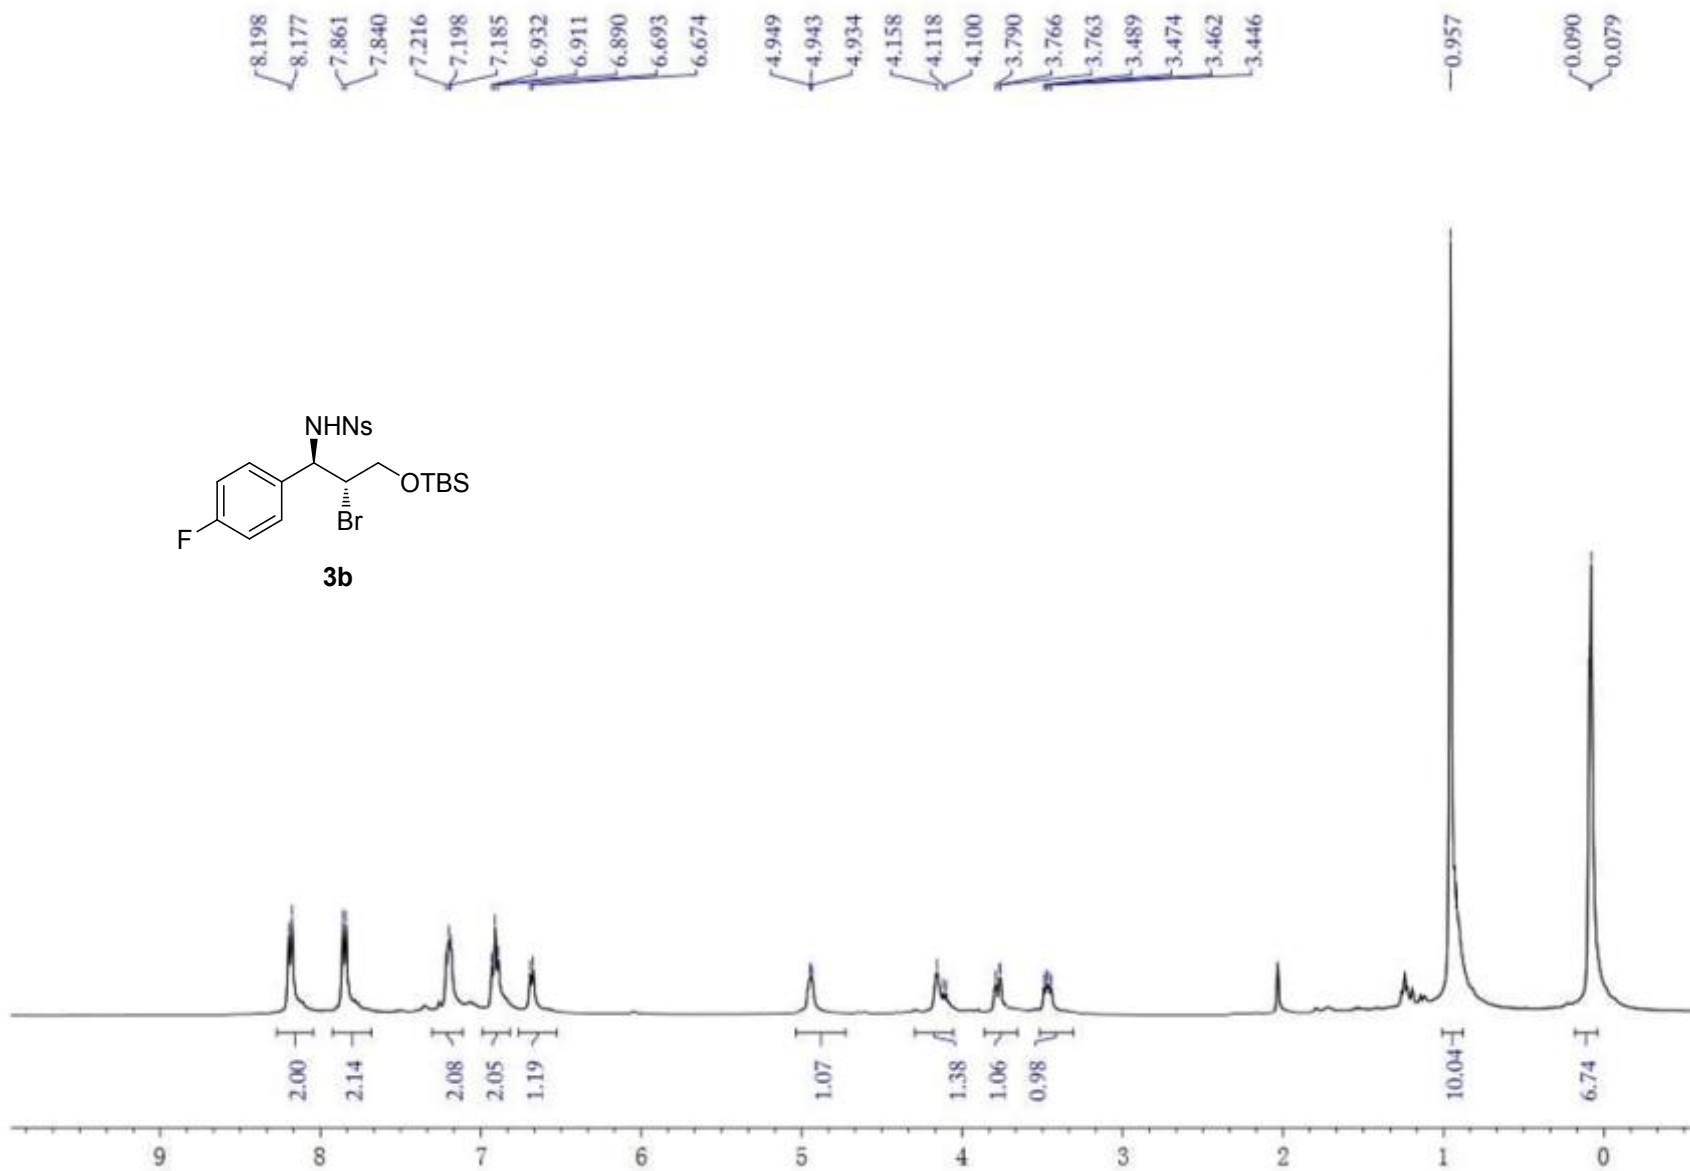

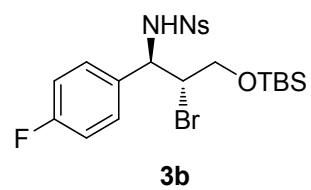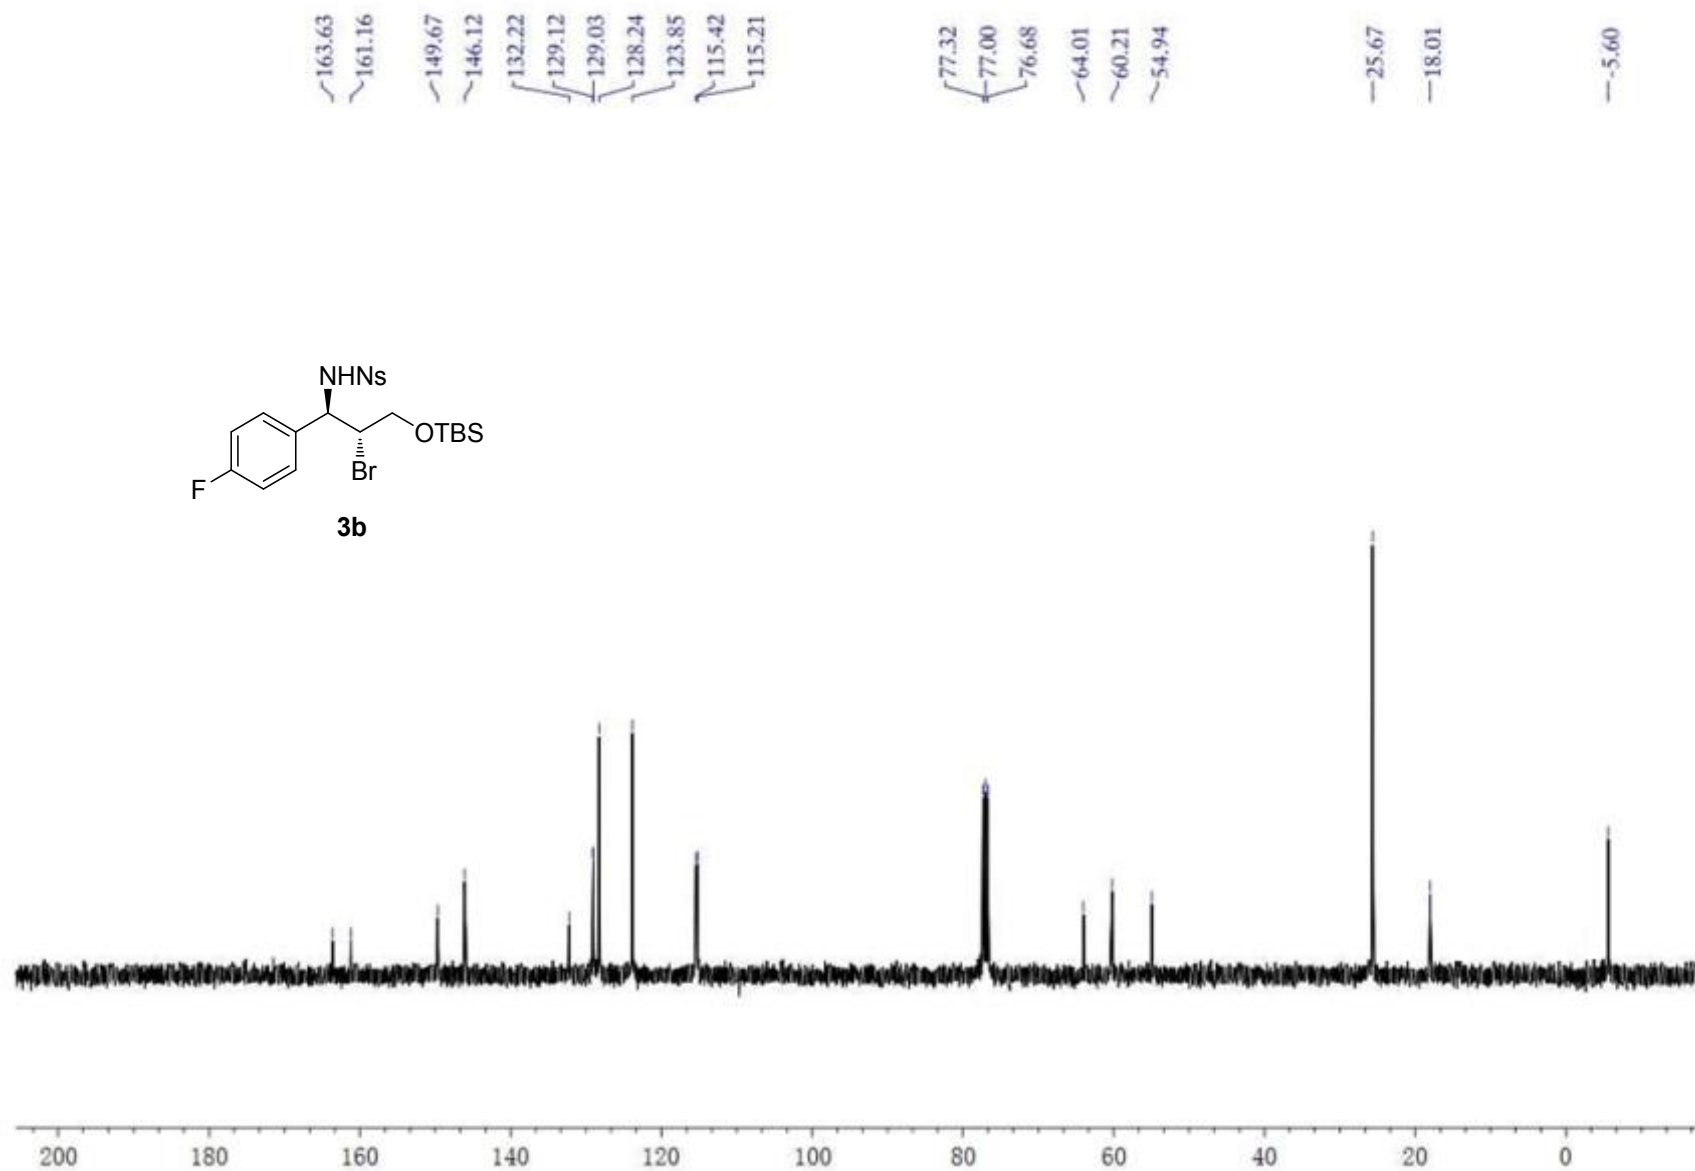

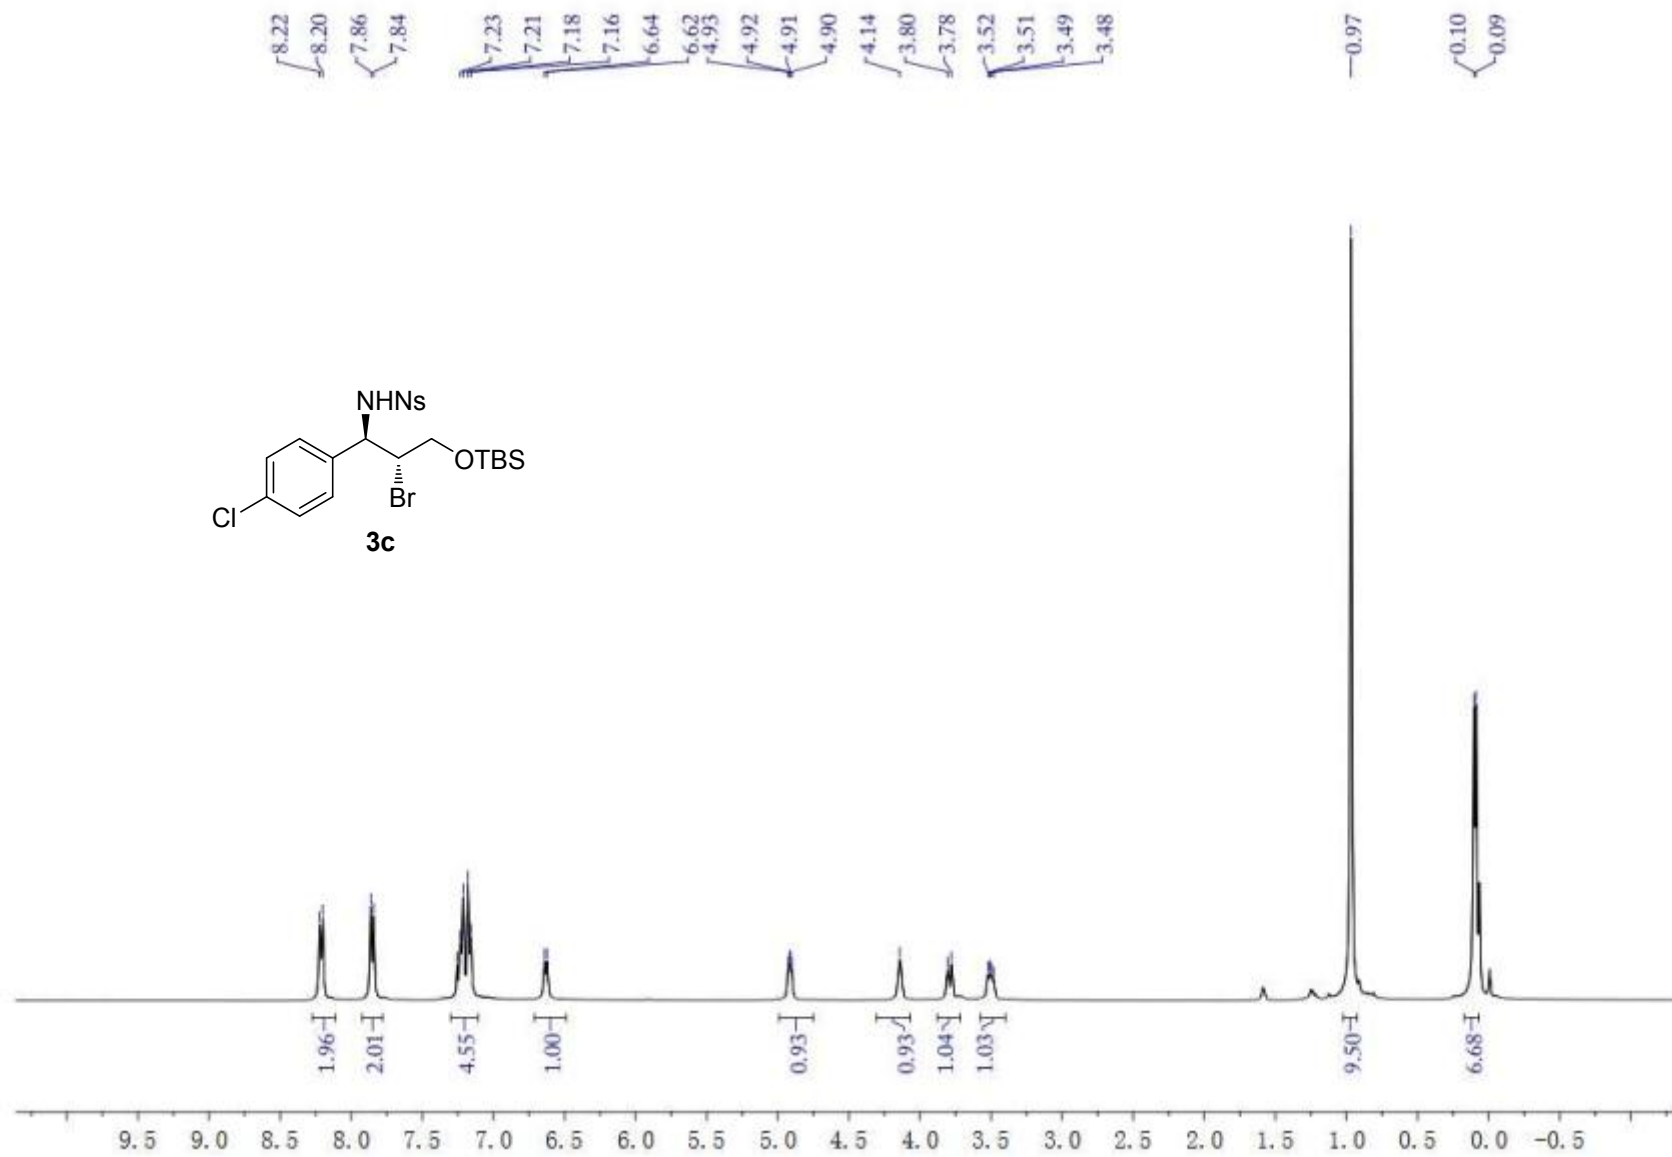

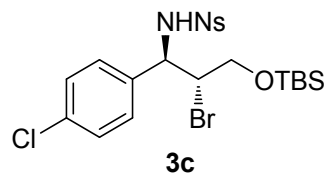

149.77  
 146.13  
 135.20  
 134.48  
 128.67  
 128.29  
 123.95

77.32  
 77.00  
 76.68  
 64.15  
 60.71  
 54.42

25.72  
 18.07

-5.54  
 -5.60

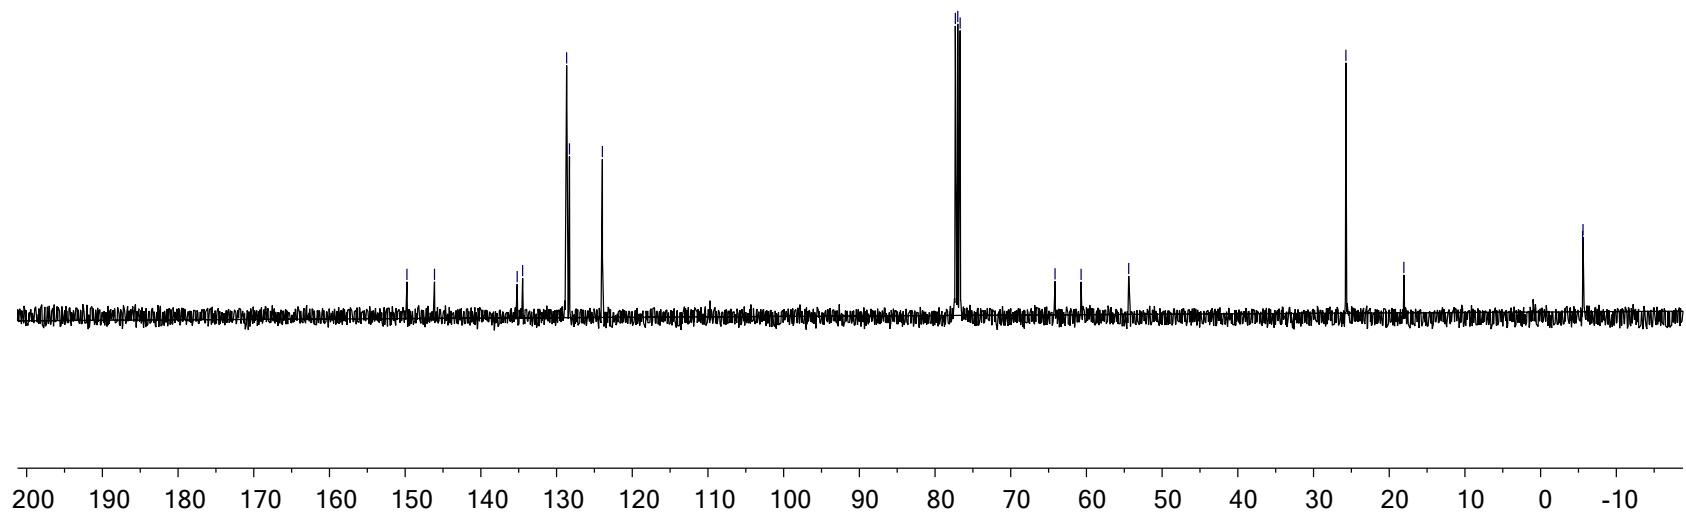

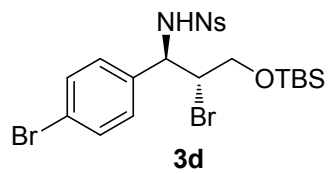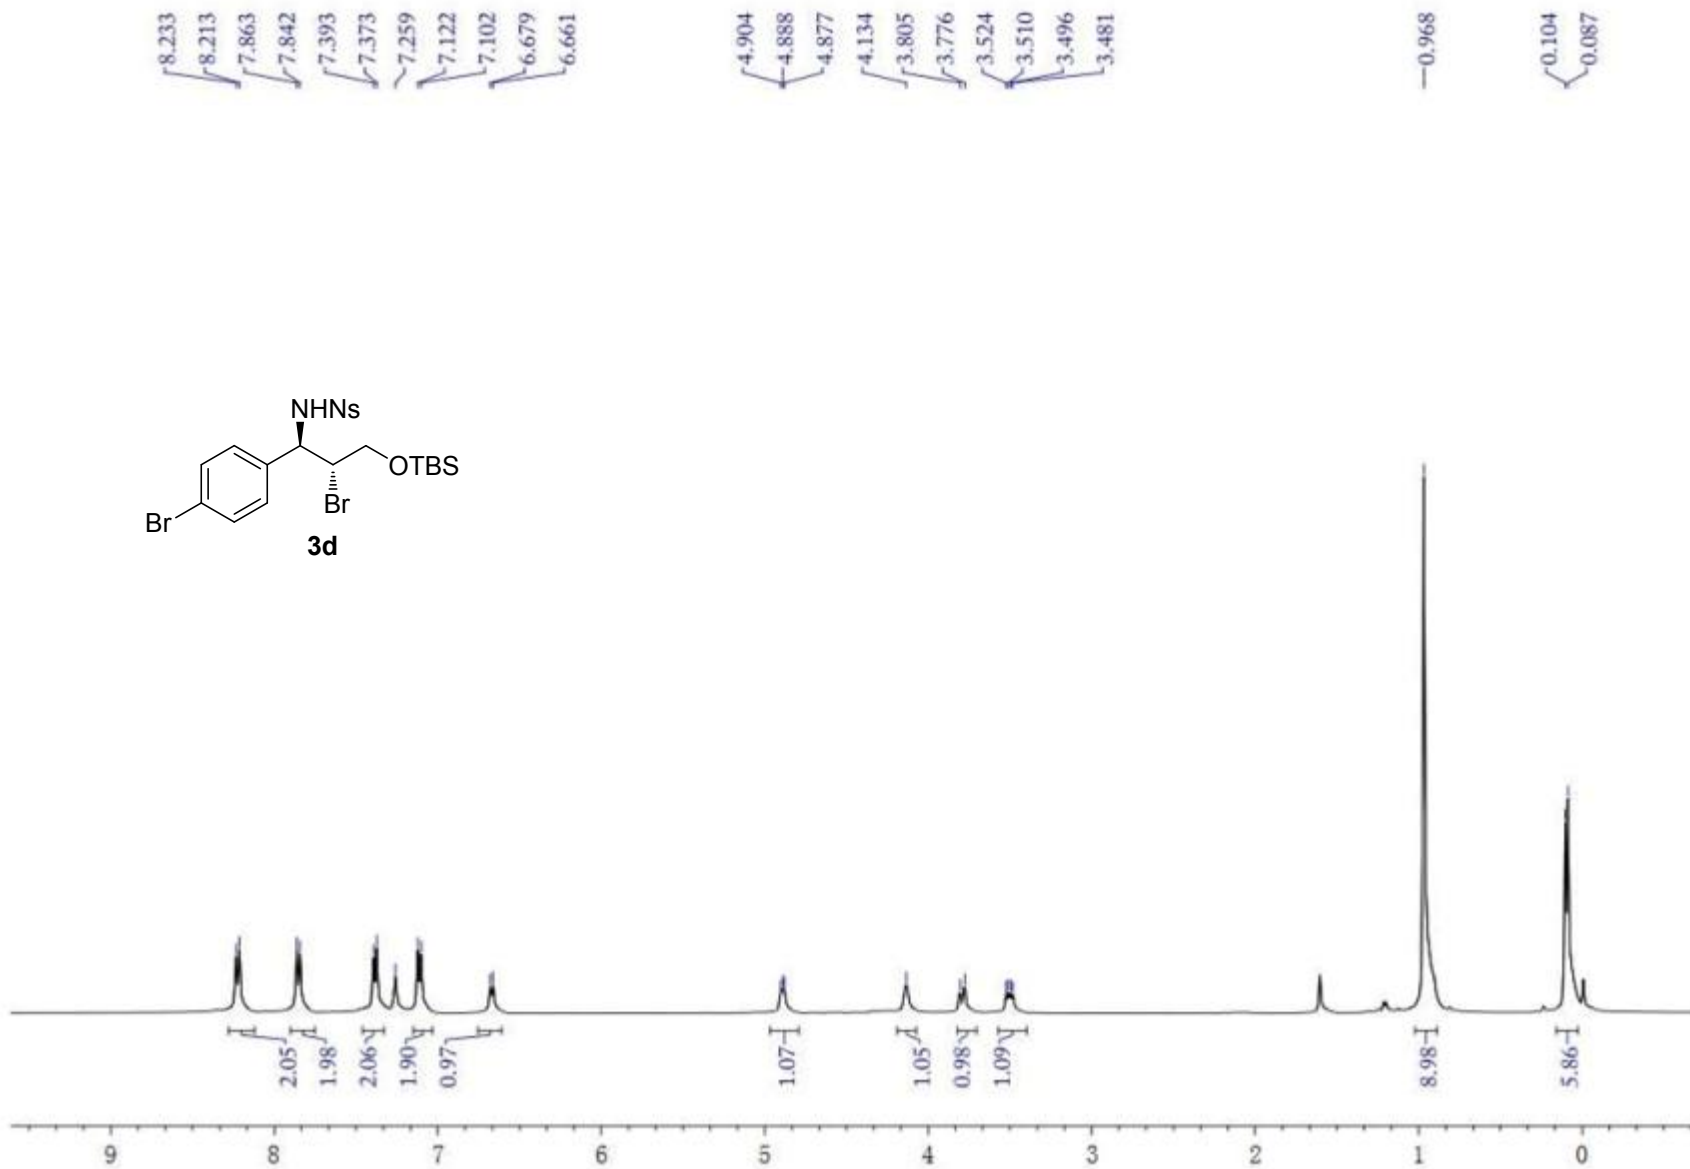



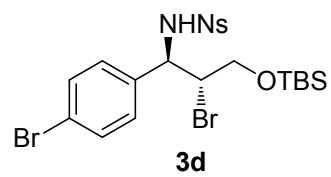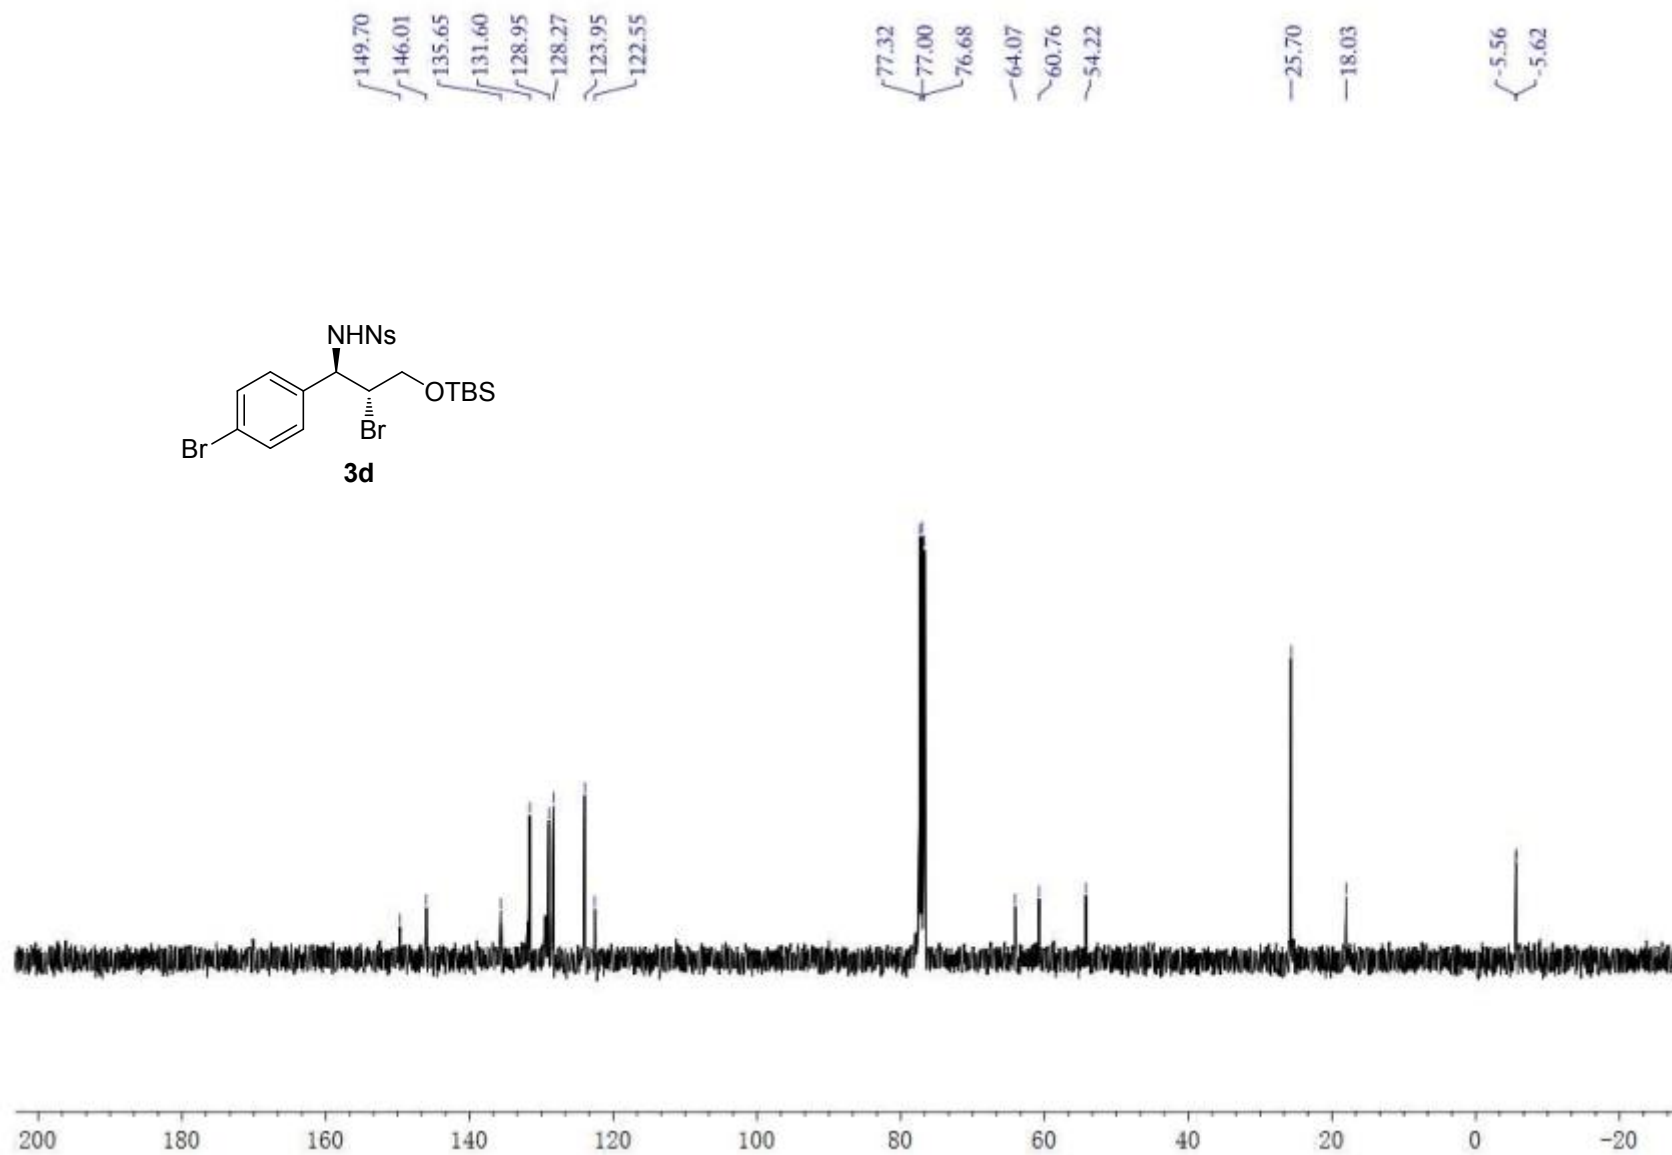

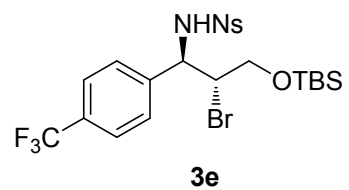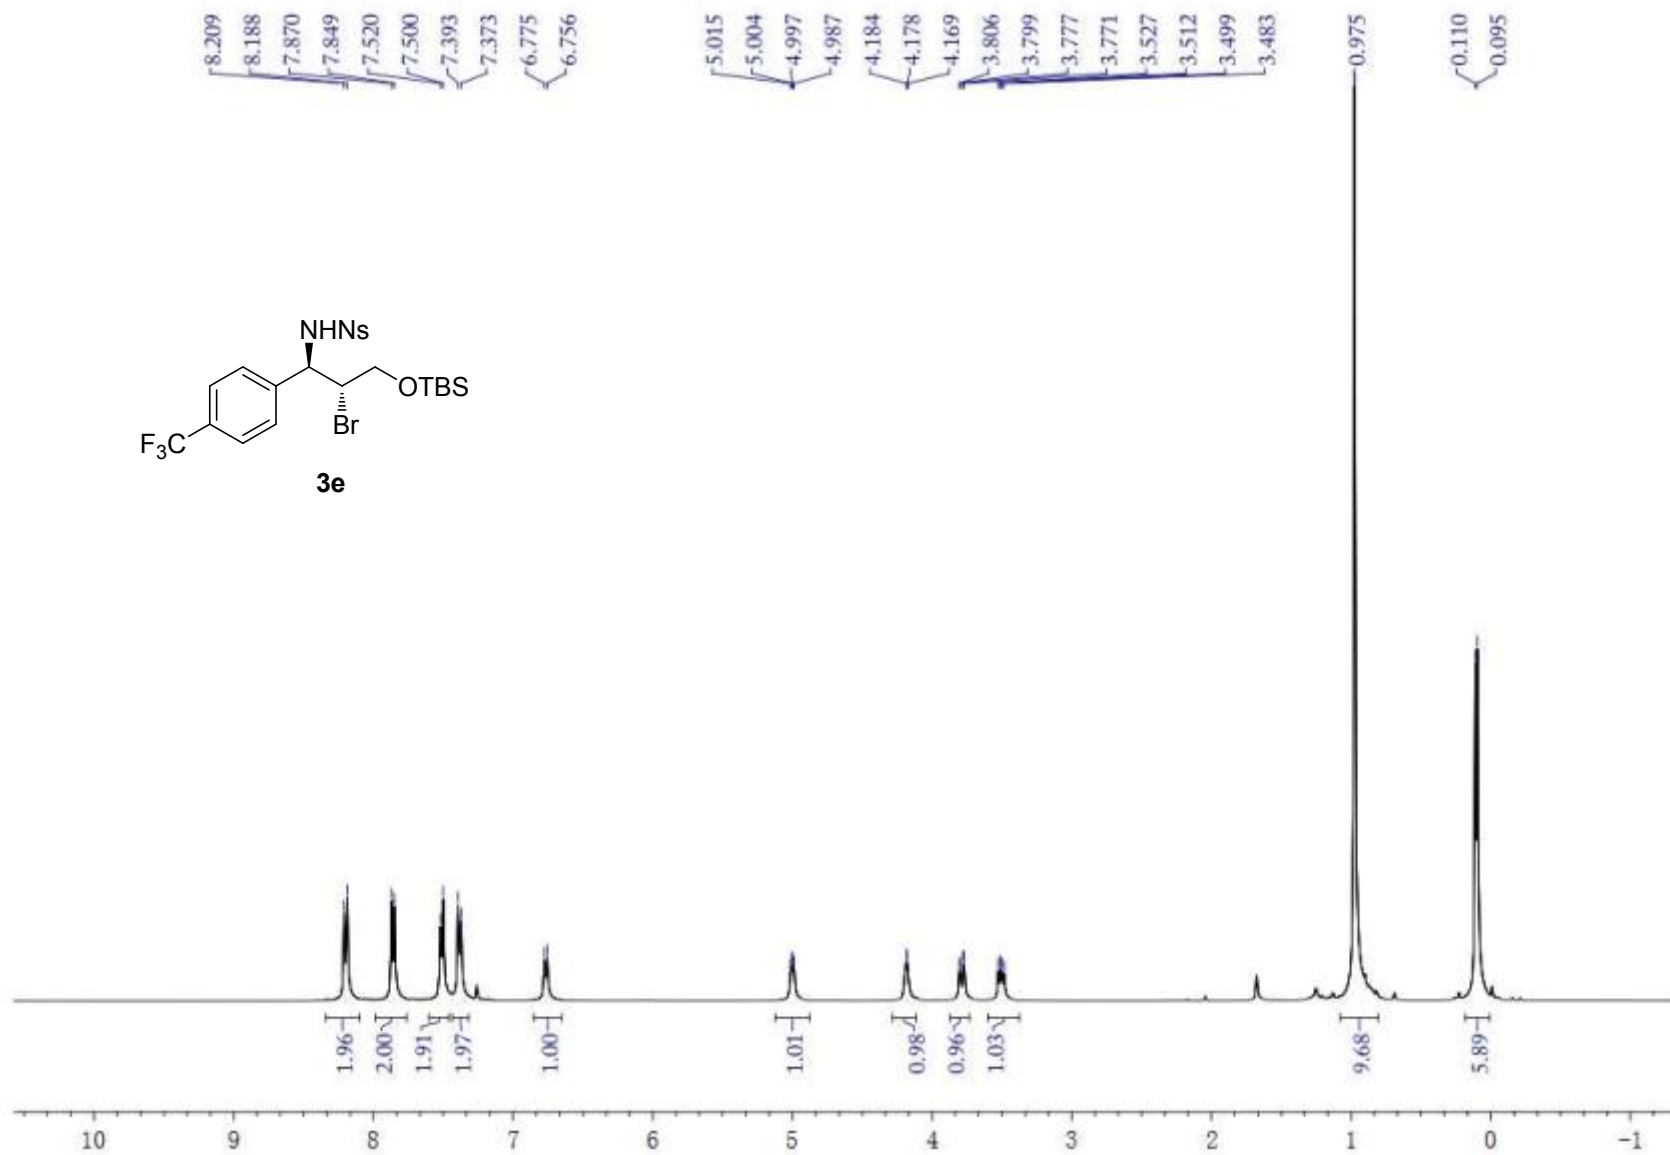

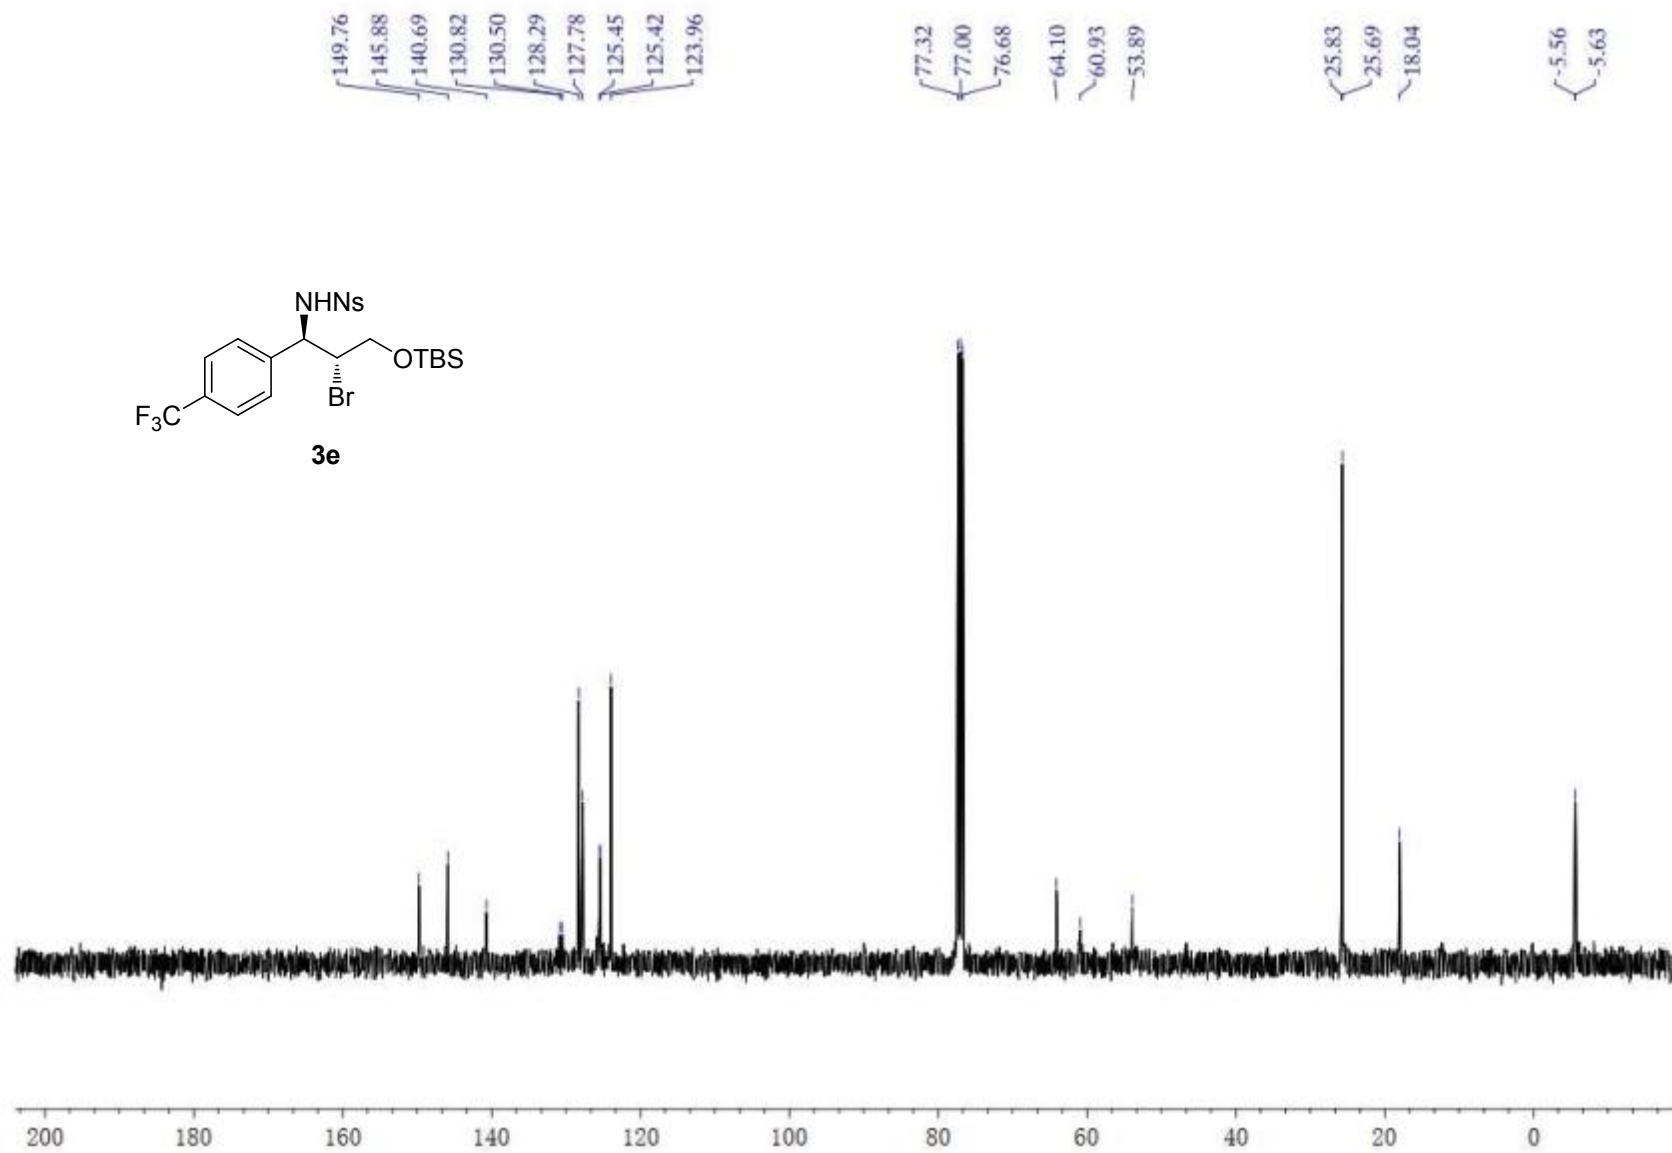

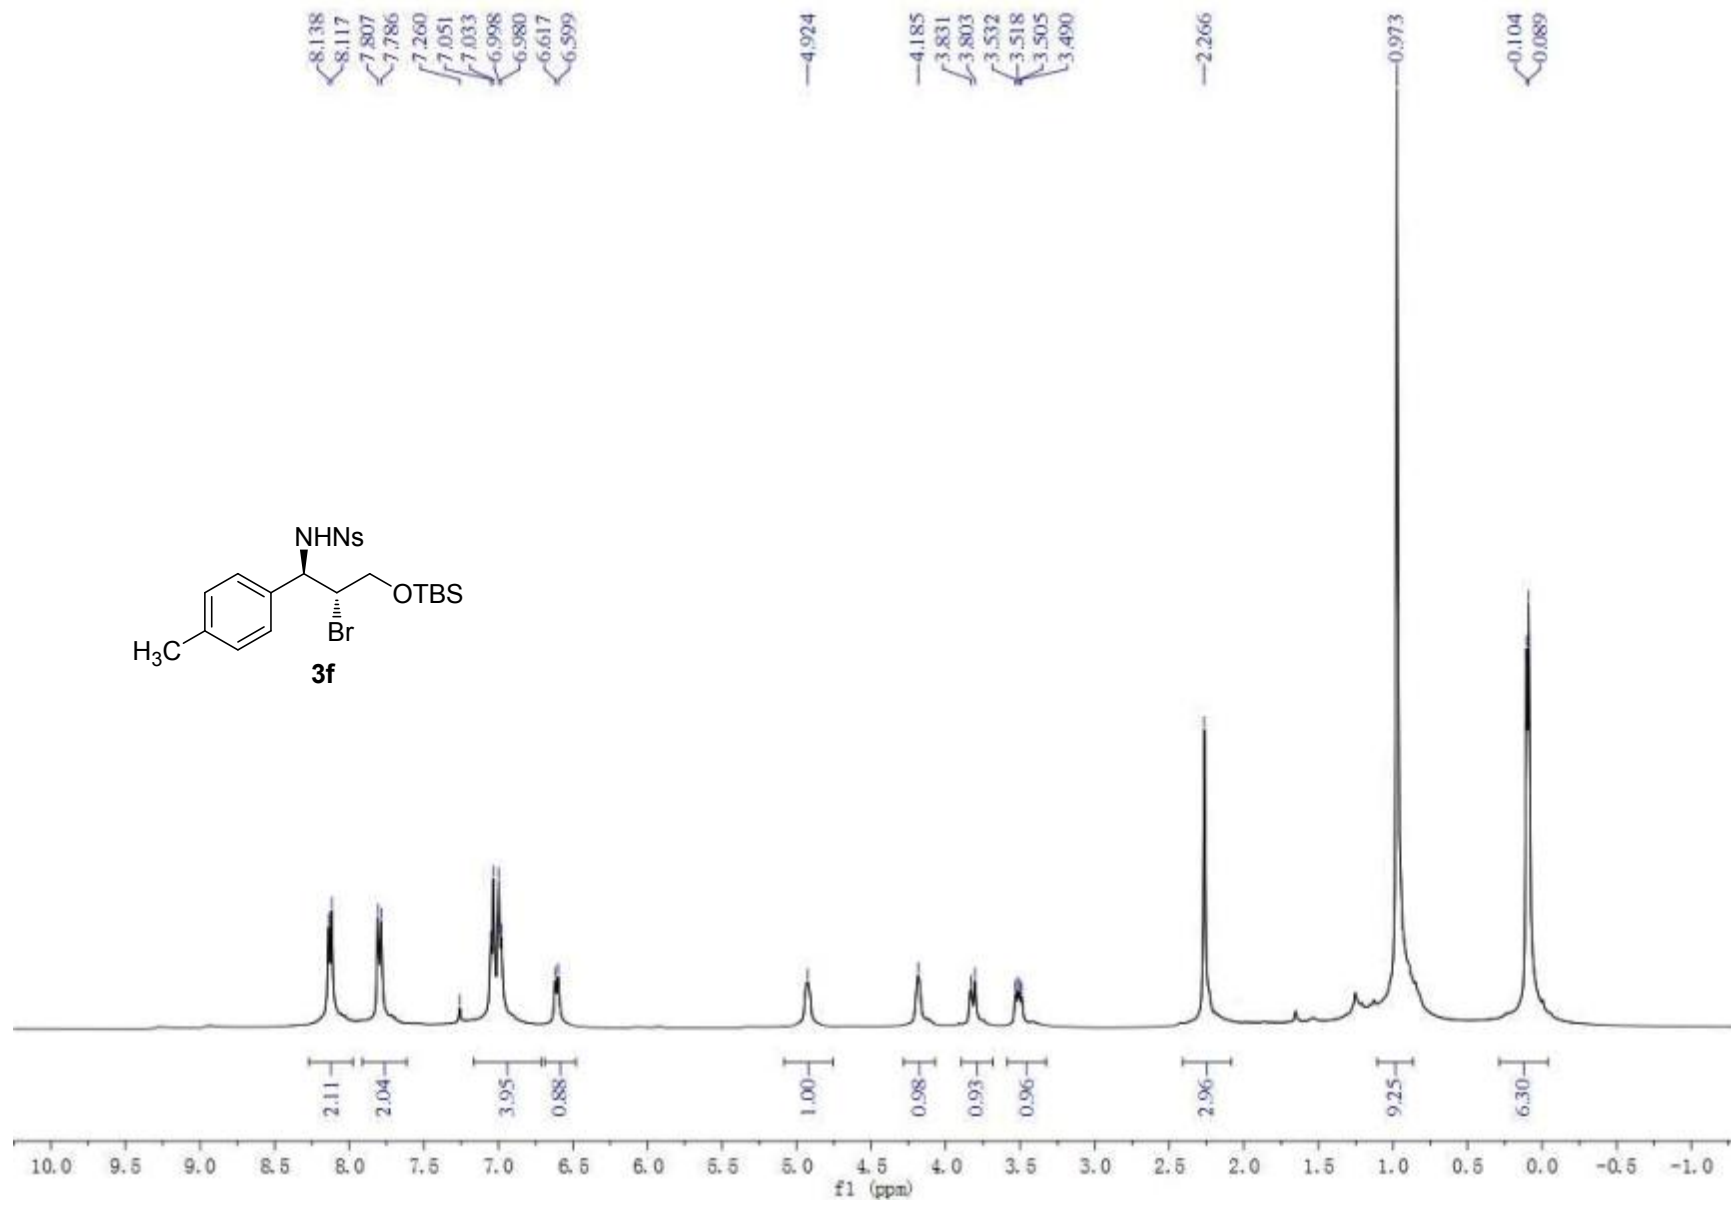

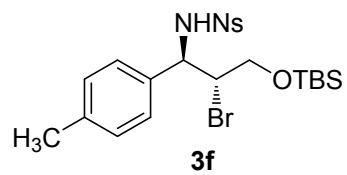

149.5  
 146.3  
 138.3  
 133.2  
 129.0  
 128.2  
 127.3  
 123.7

77.3  
 77.0  
 76.7  
 64.2  
 61.0  
 55.1

25.7  
 21.0  
 18.1

-5.6  
 -5.6

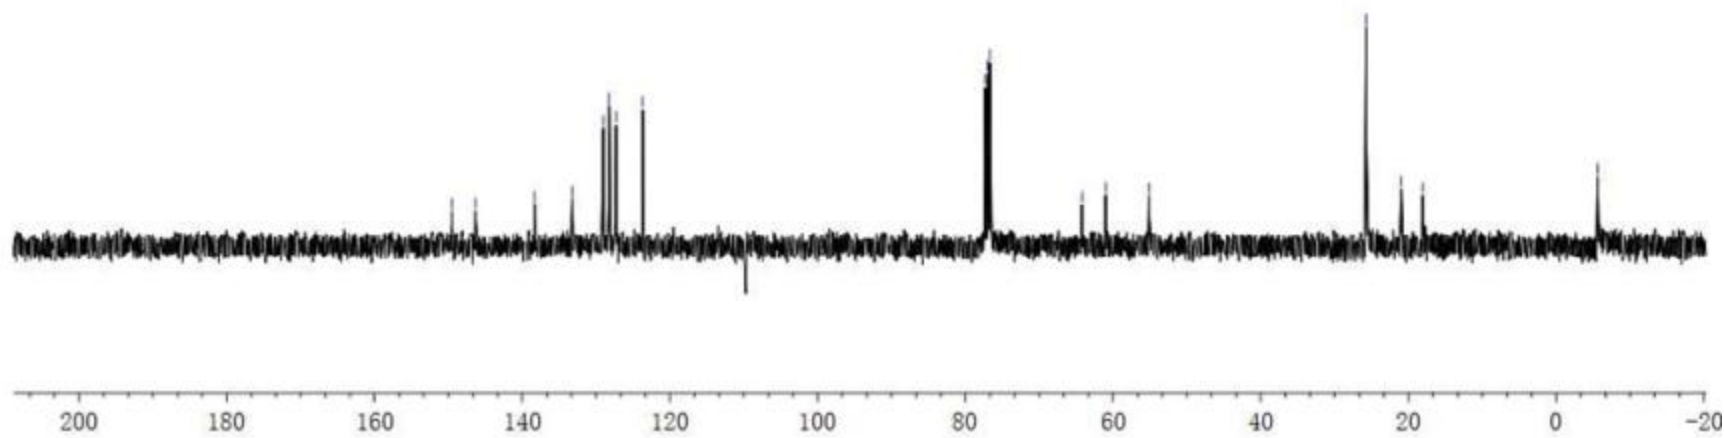

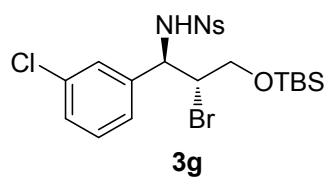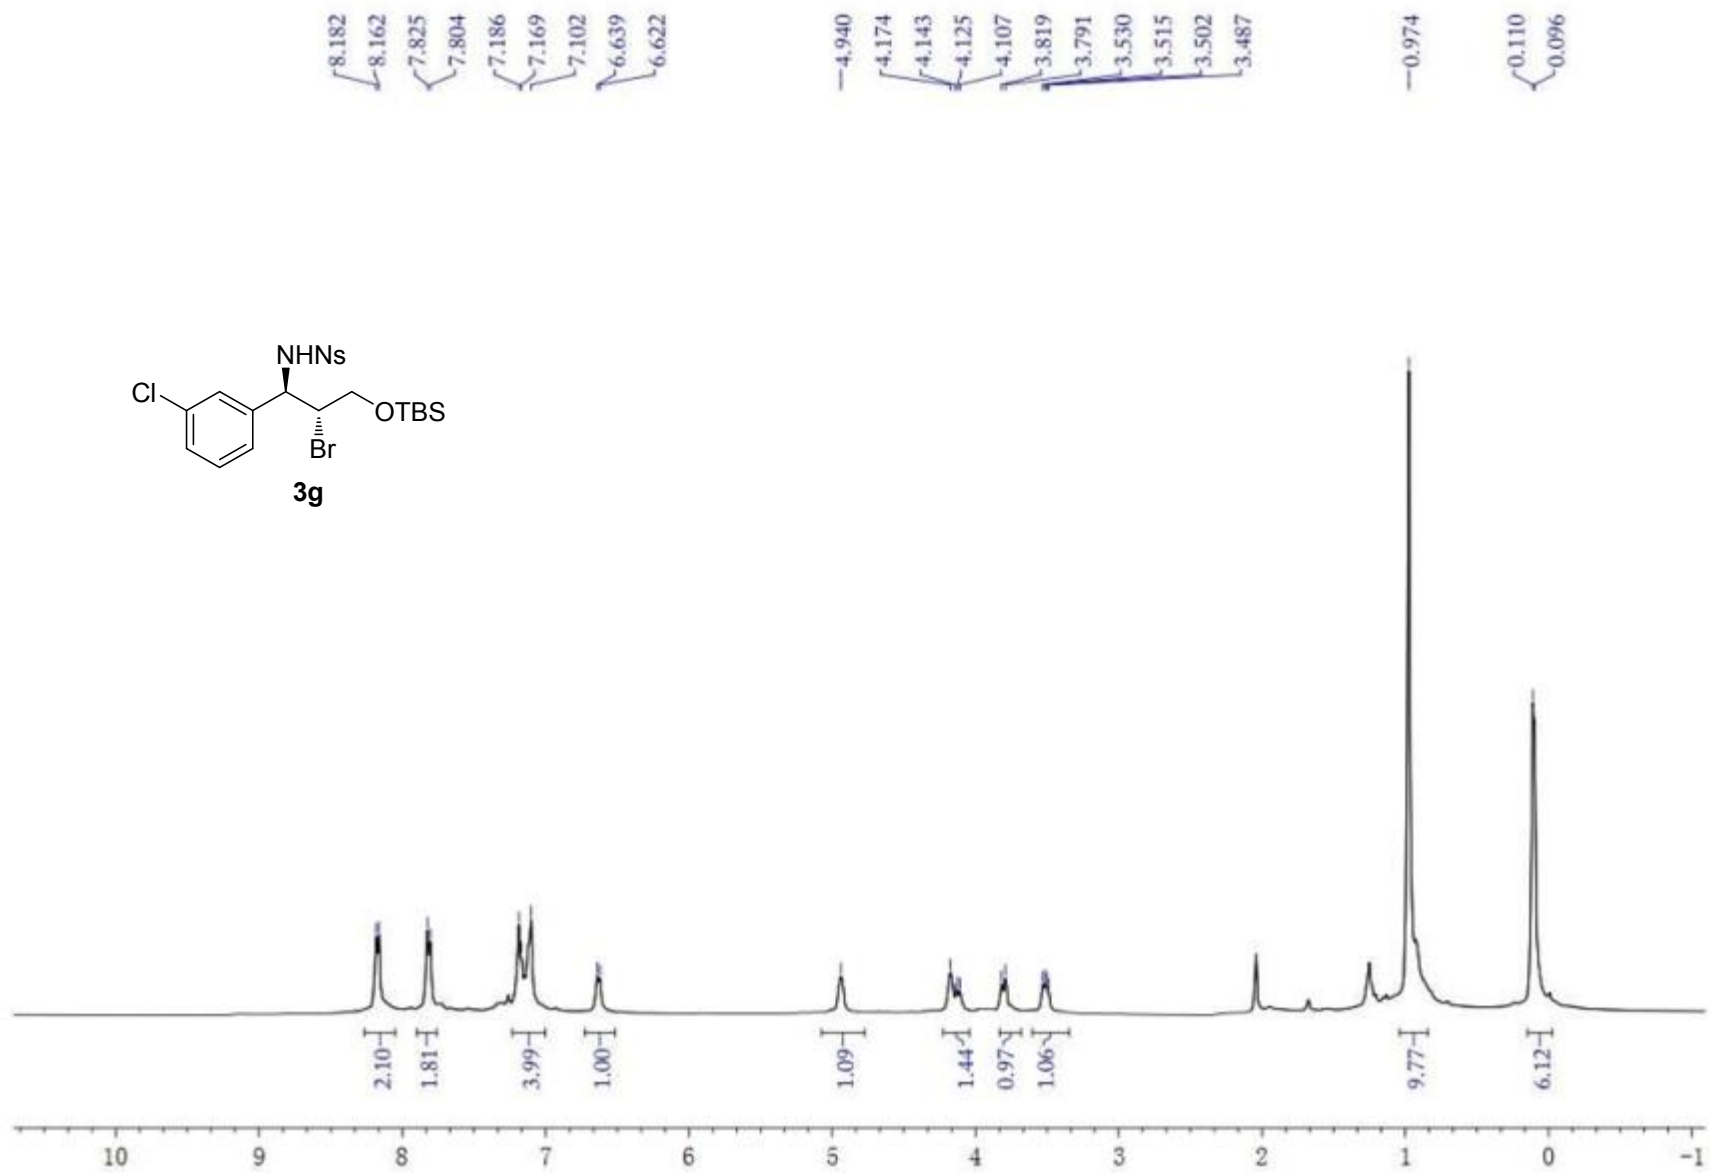

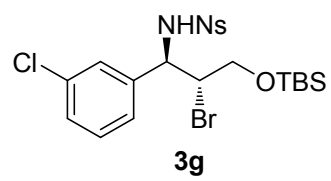

149.68  
146.01  
138.18  
134.39  
129.70  
128.51  
128.14  
127.53  
125.71  
123.85

77.32  
77.00  
76.68  
64.14  
60.51  
54.17

25.70  
18.03

-5.60  
-5.66

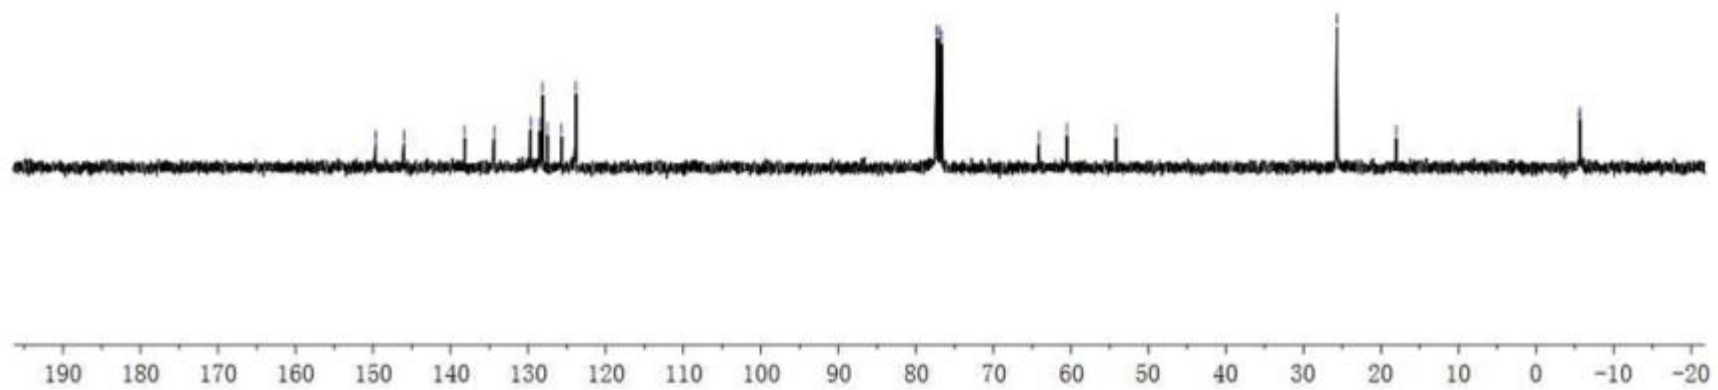

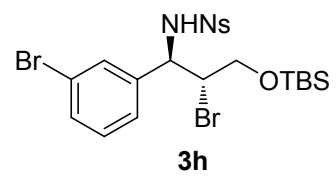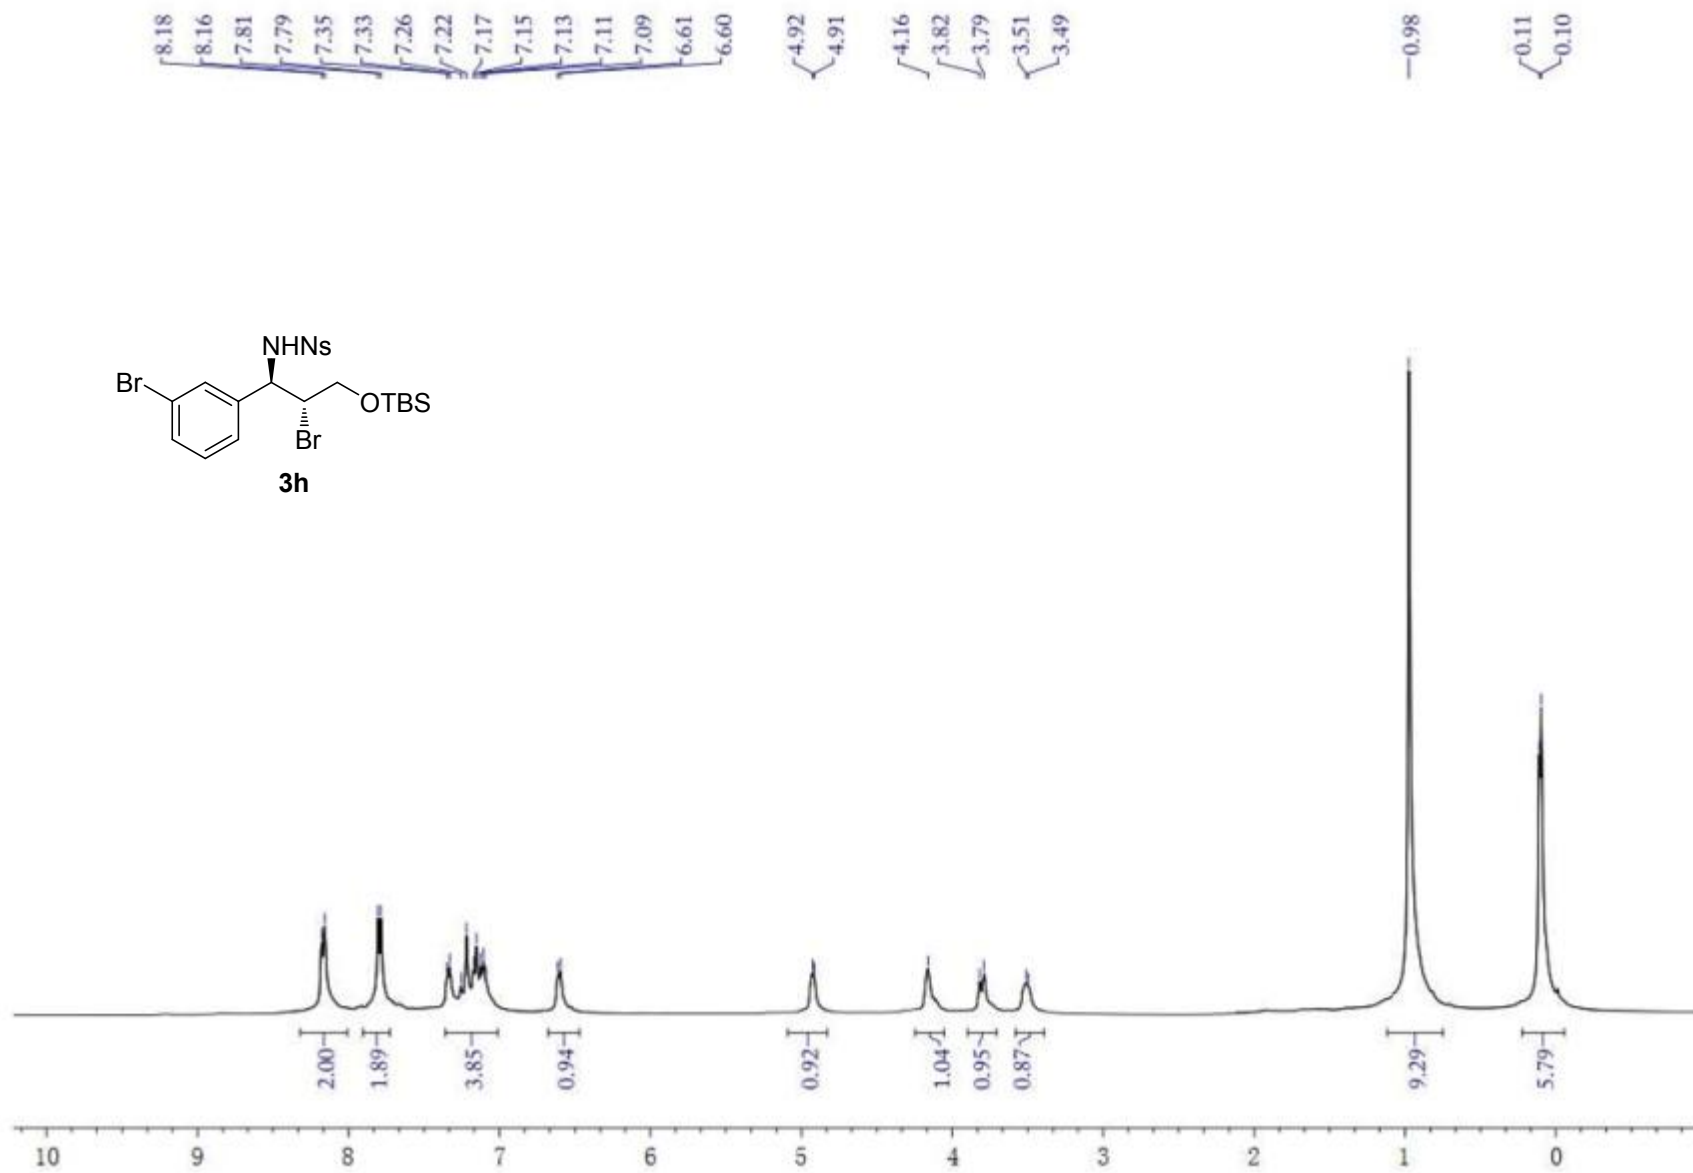



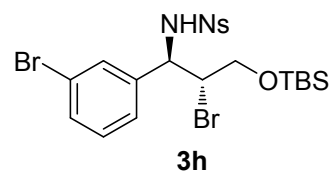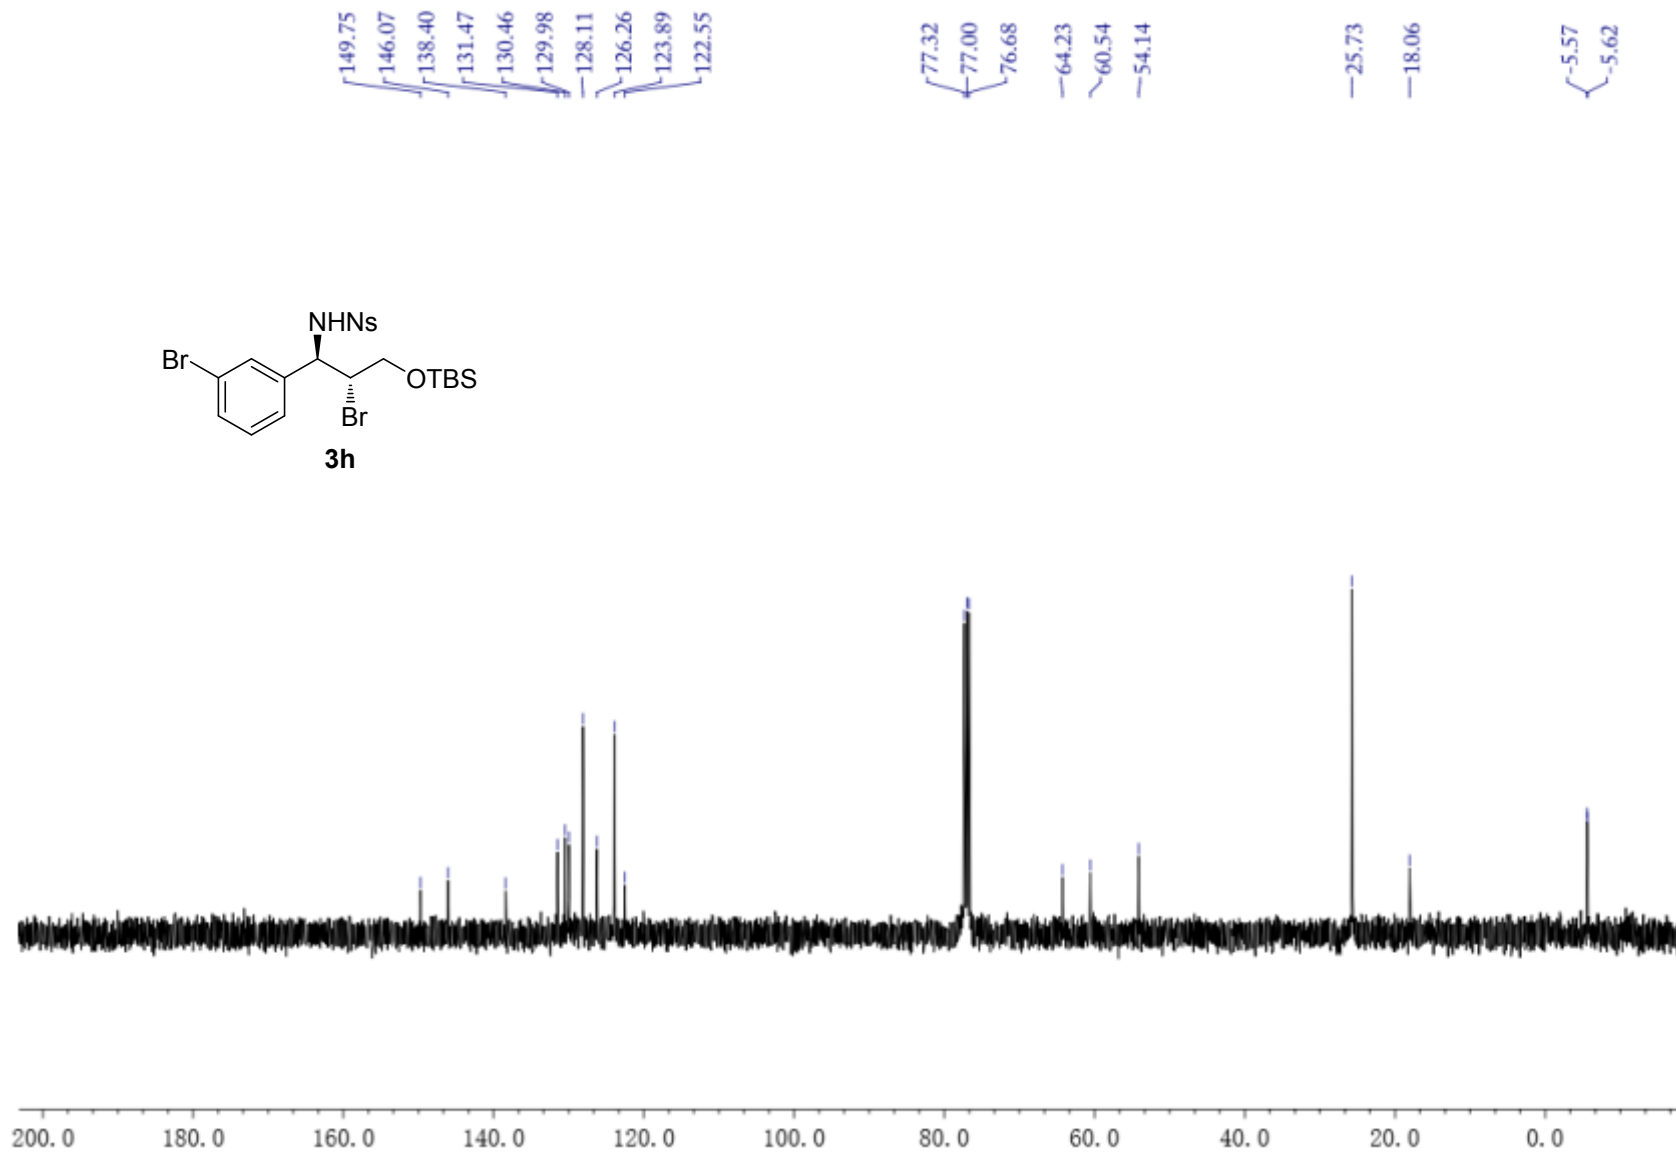

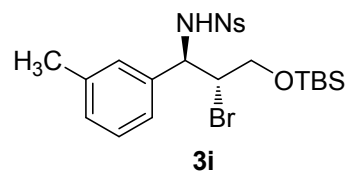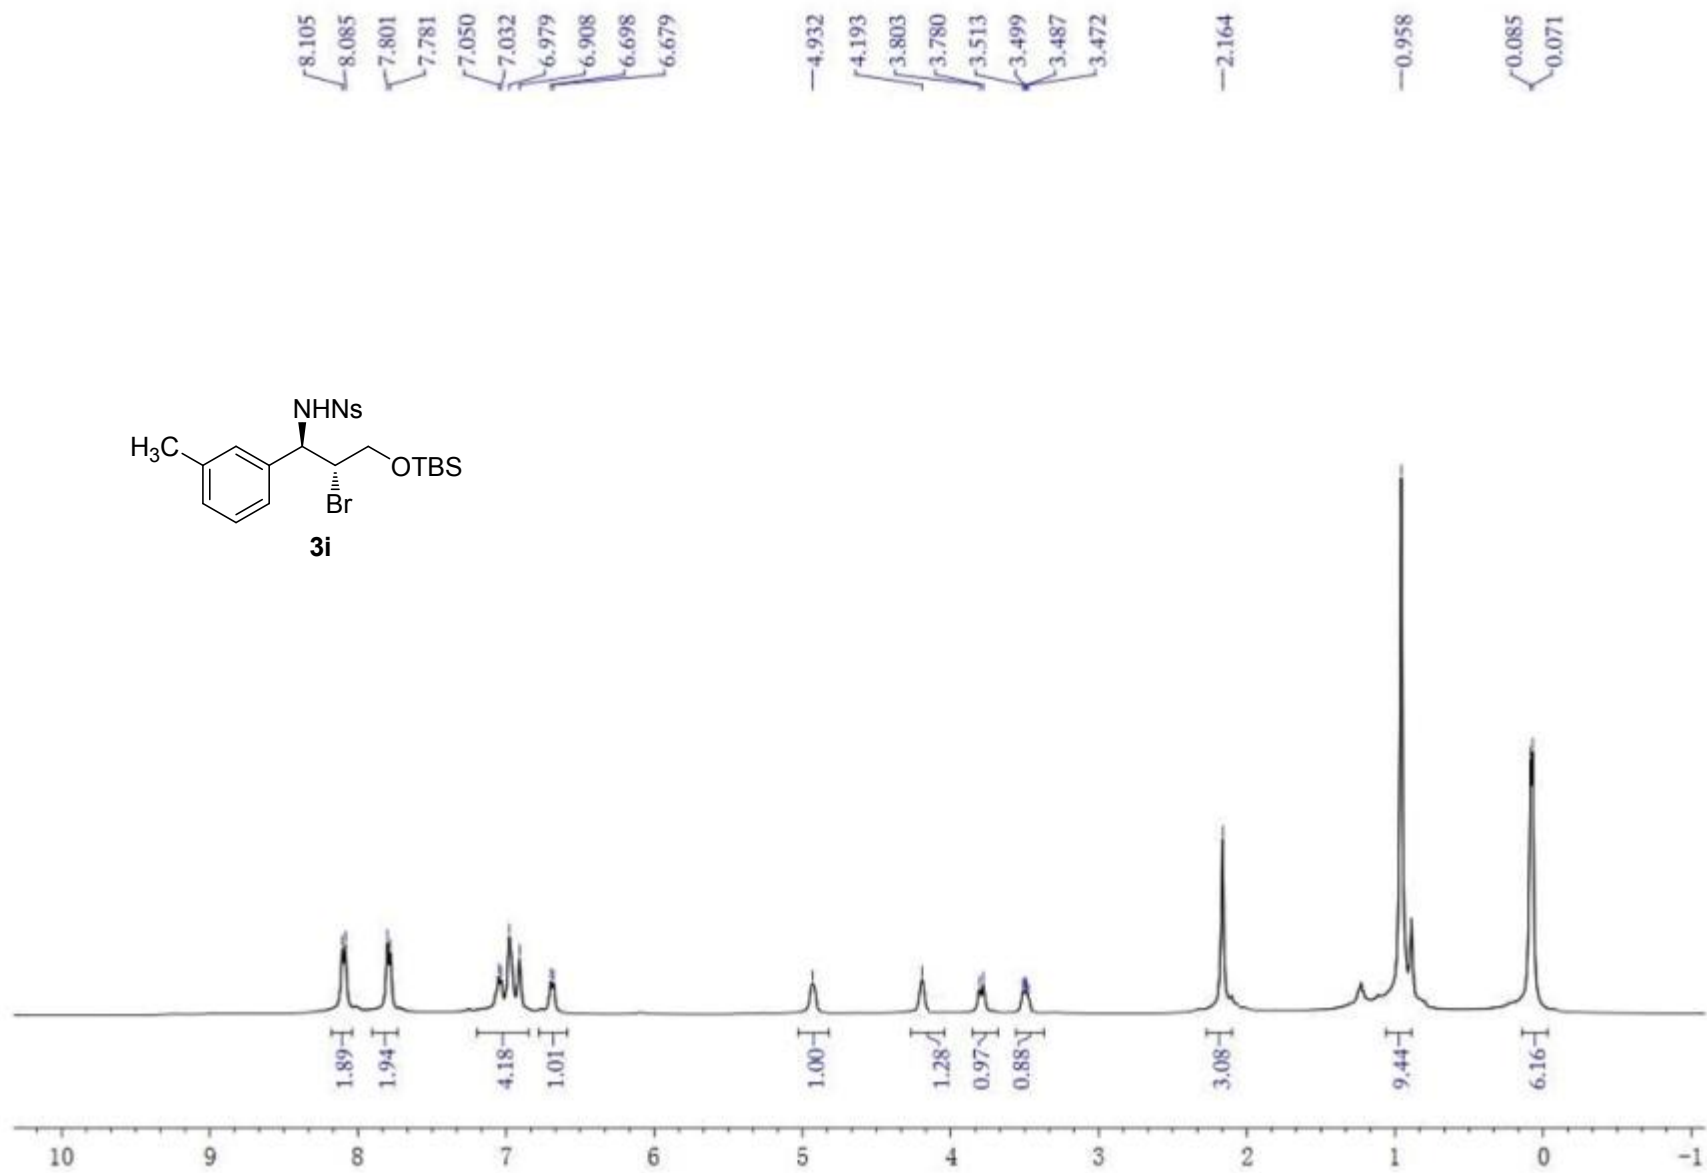

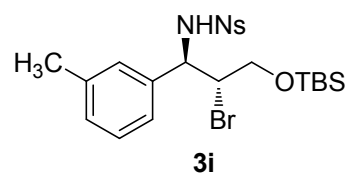

149.43  
 148.92  
 146.20  
 137.83  
 135.89  
 128.86  
 128.13  
 127.97  
 124.50  
 123.53

77.32  
 77.00  
 76.68  
 64.10  
 60.85  
 55.03

25.62  
 25.53  
 21.07  
 17.96

-5.69  
 -5.73

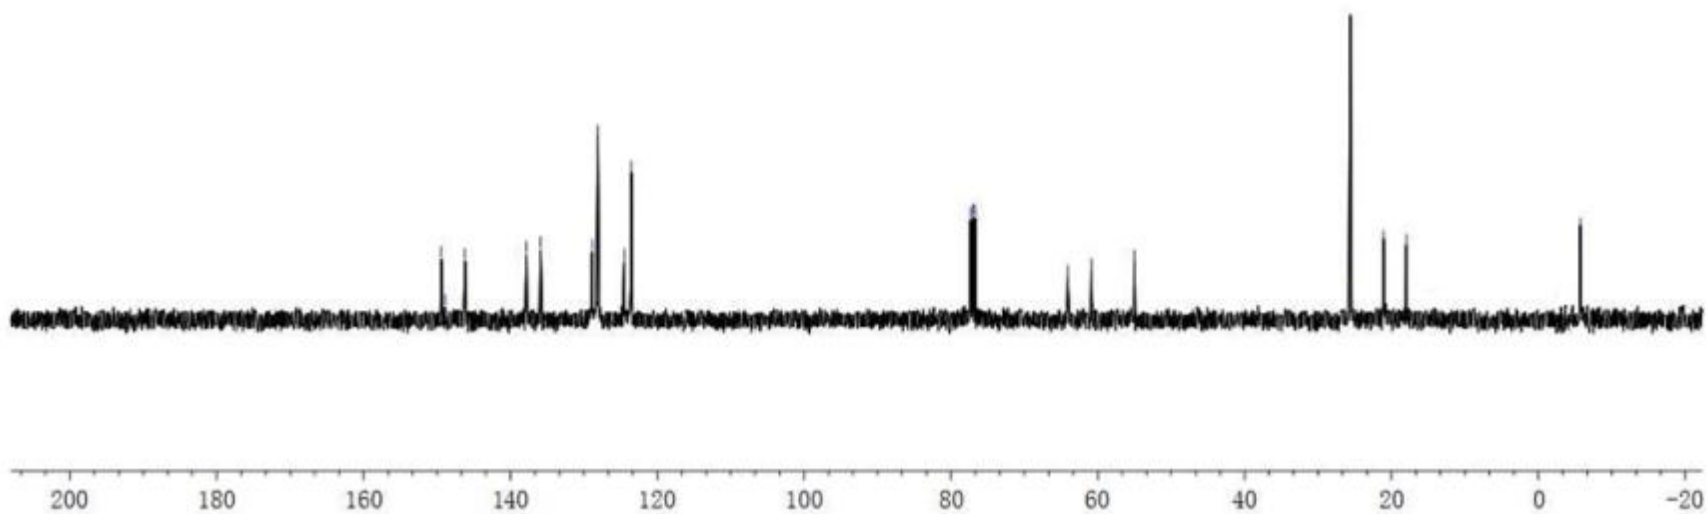

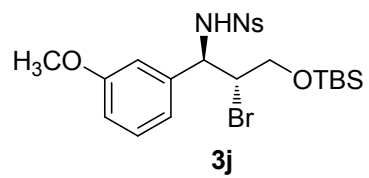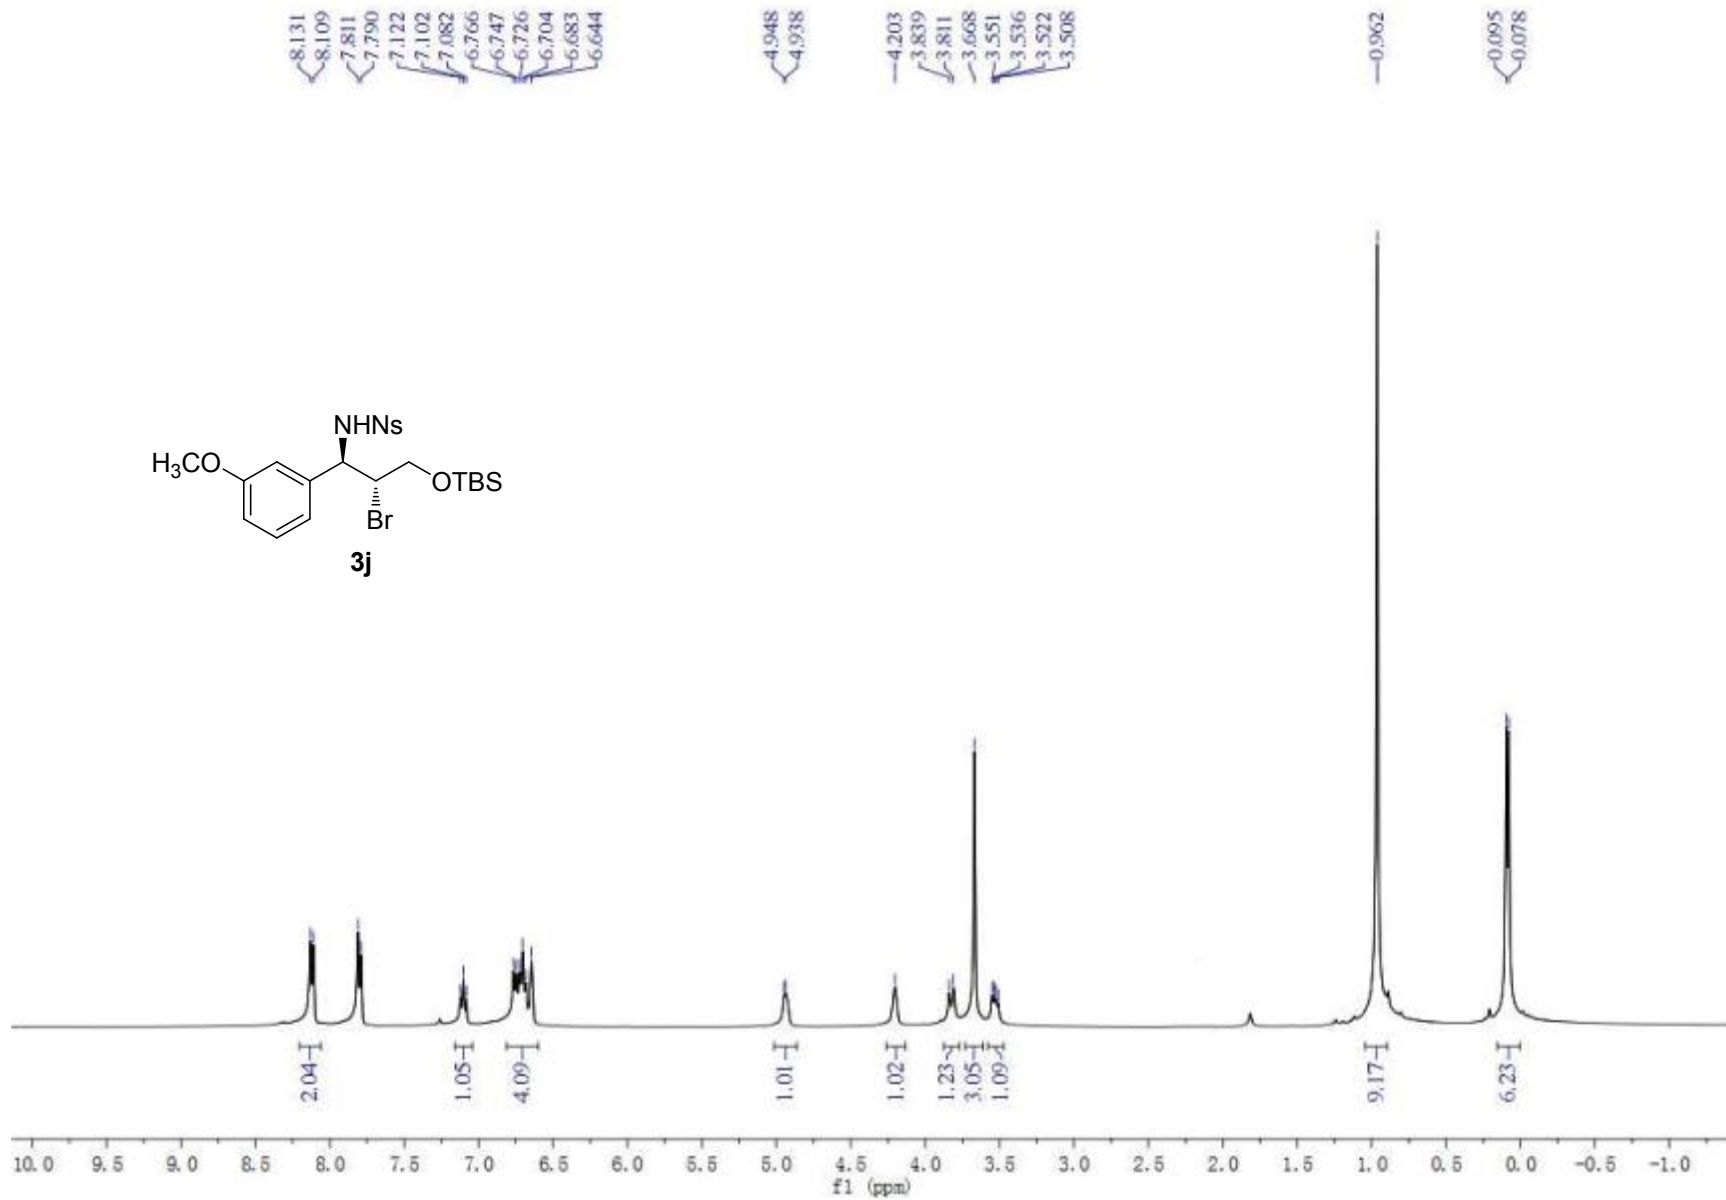

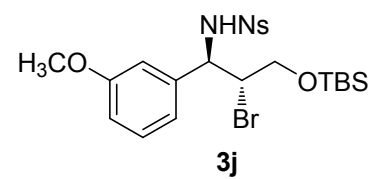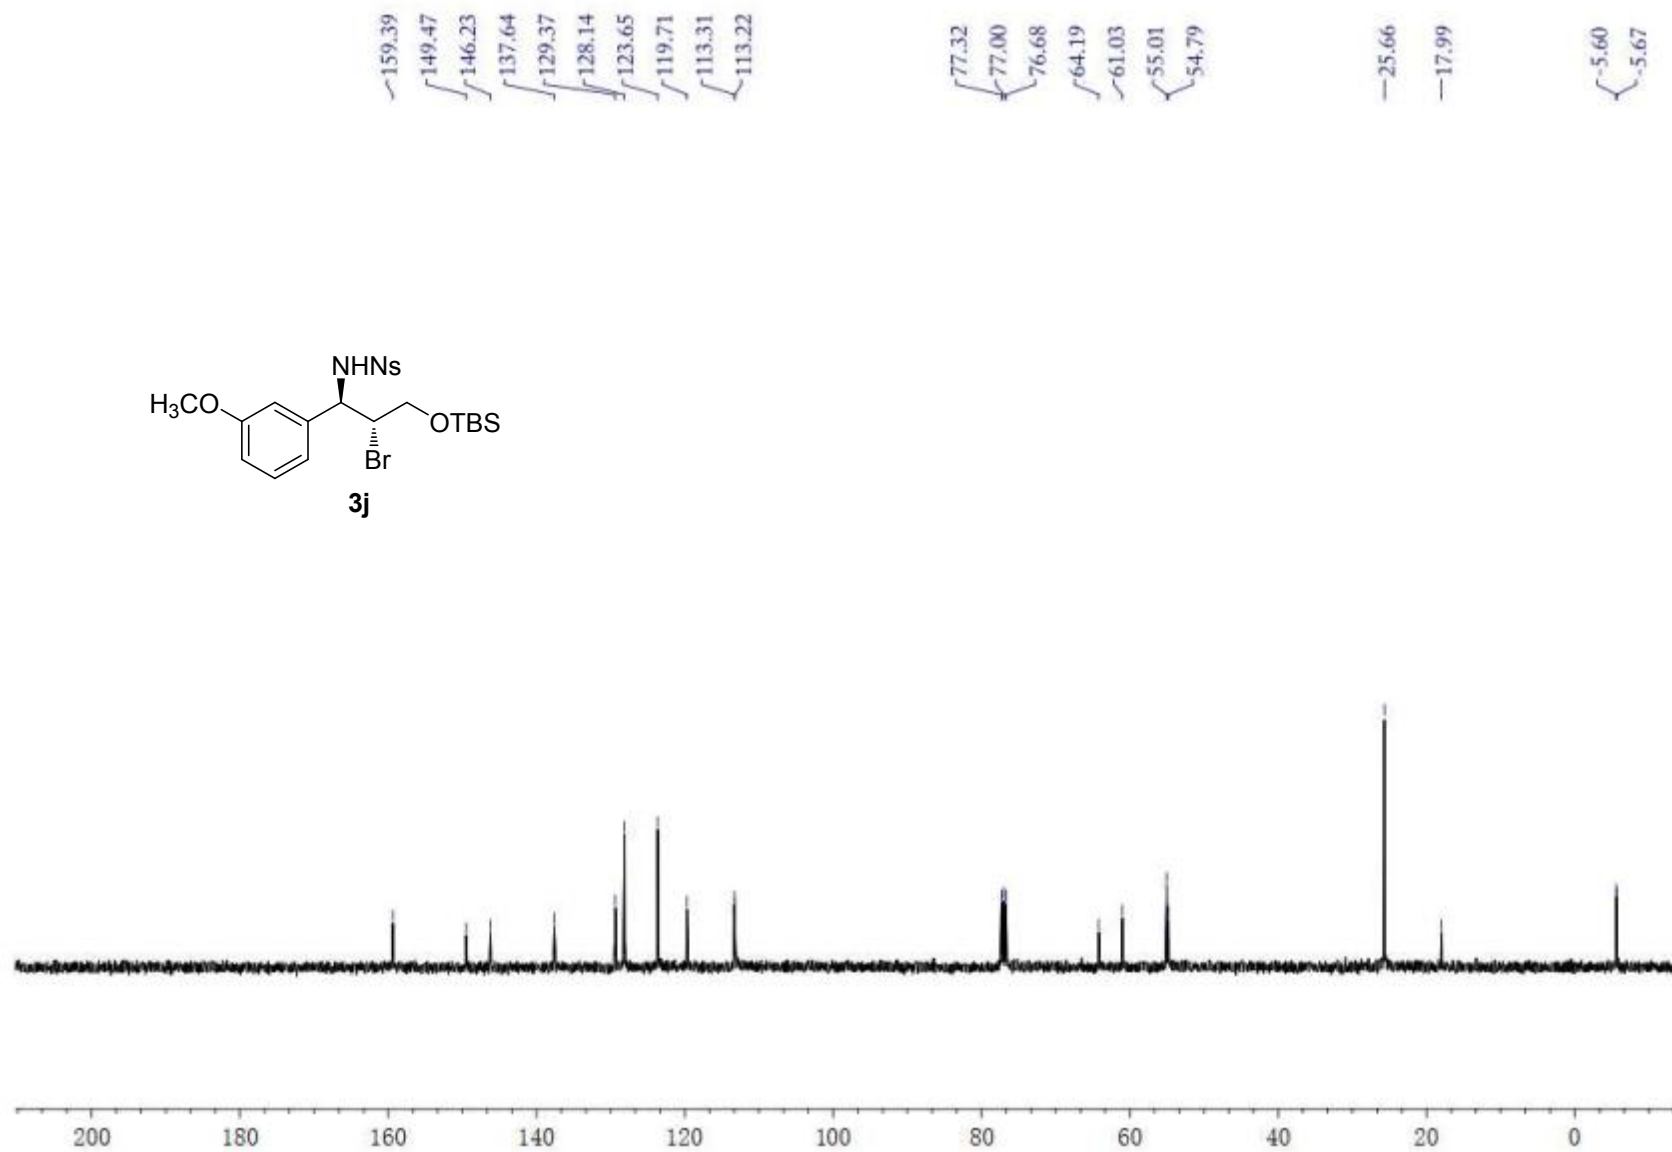

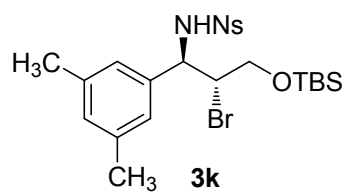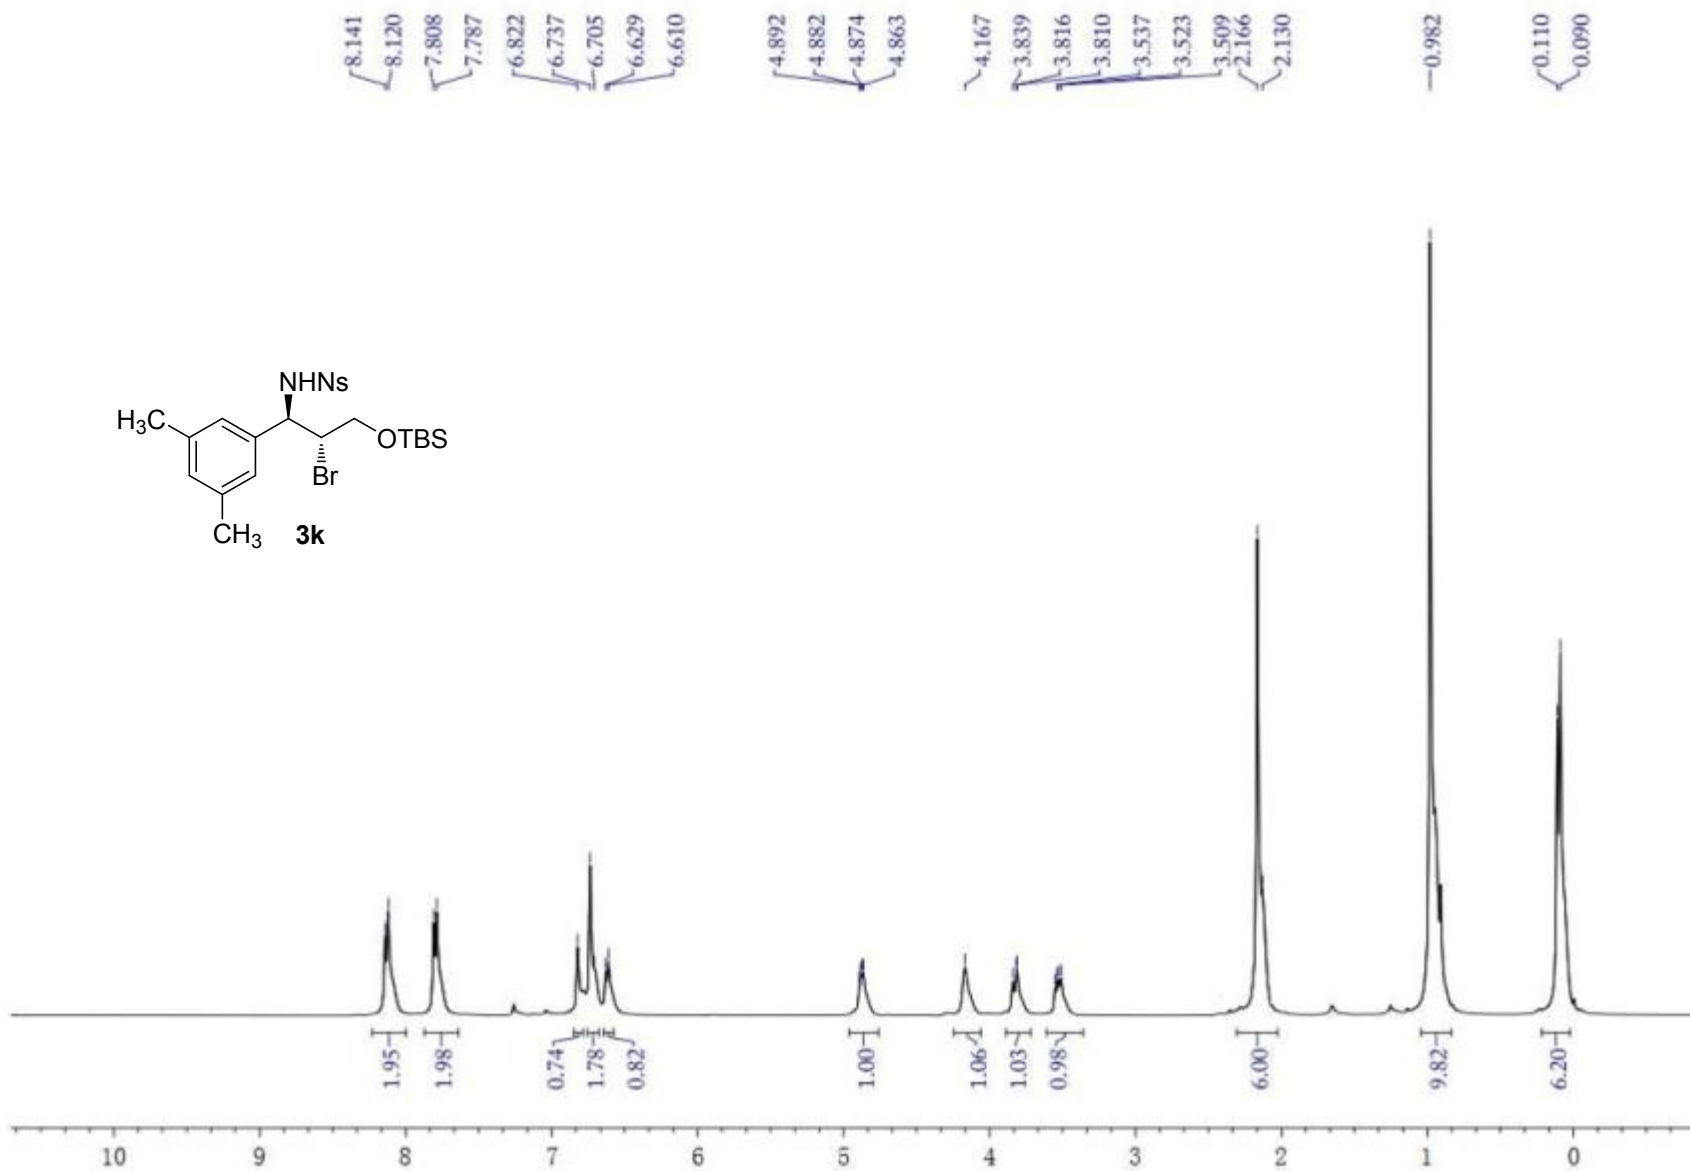

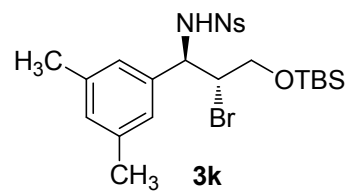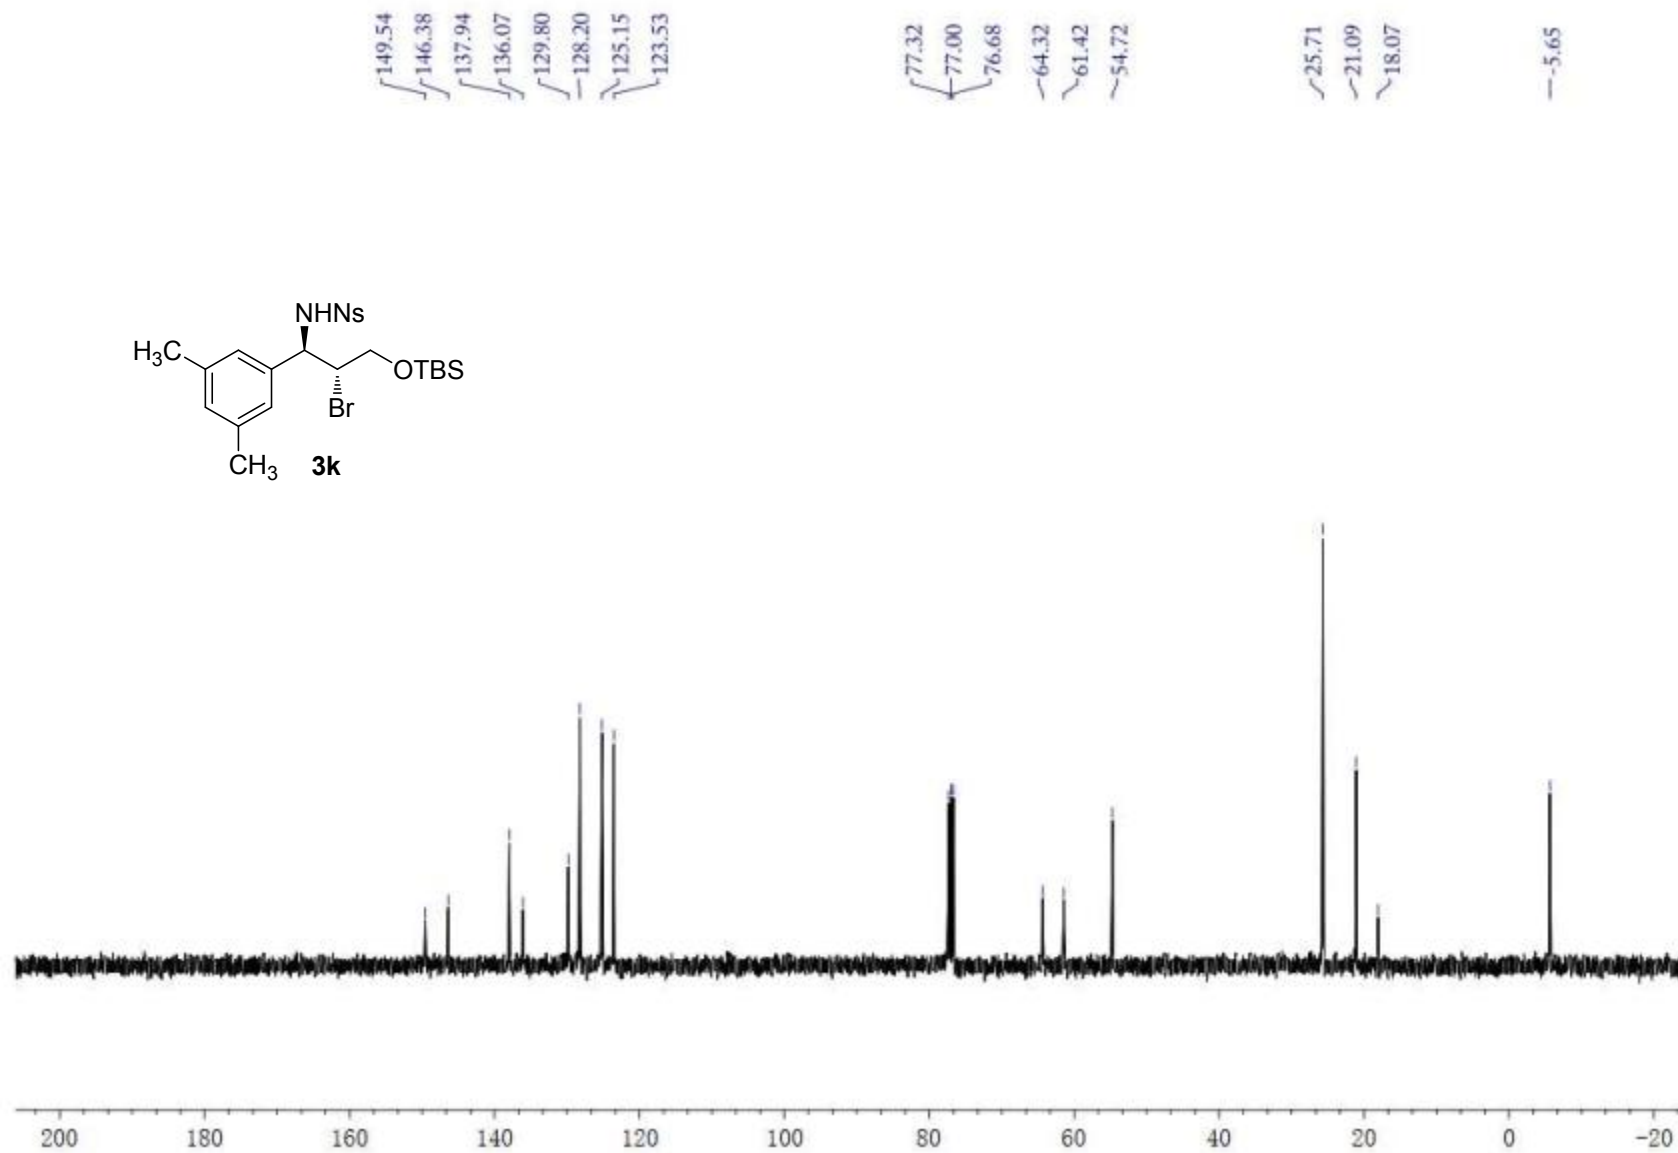

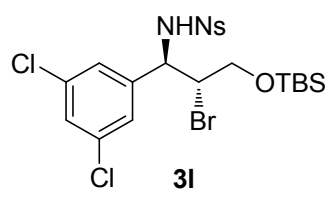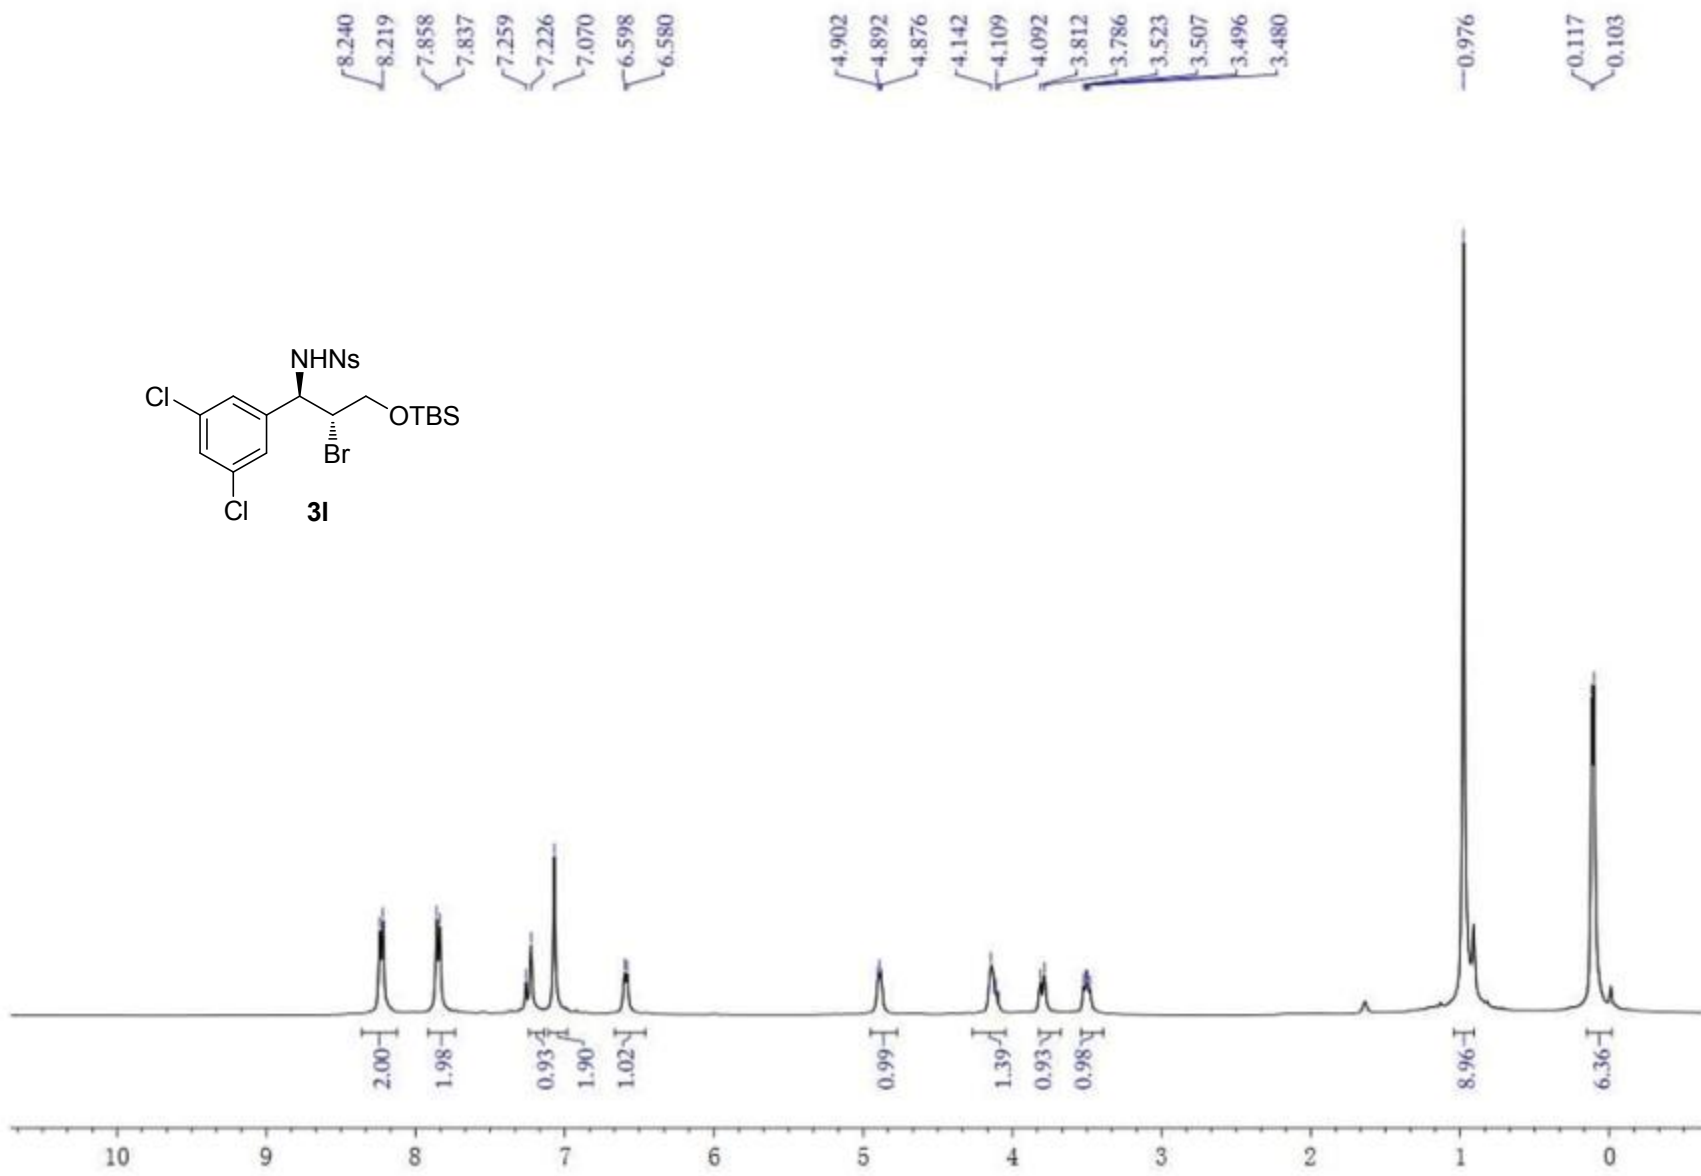



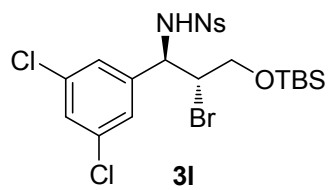

149.88  
 145.85  
 139.59  
 135.17  
 128.52  
 128.18  
 126.07  
 123.98

77.32  
 77.00  
 76.68  
 64.16  
 60.09  
 53.59

25.72  
 18.06

5.60  
 5.66

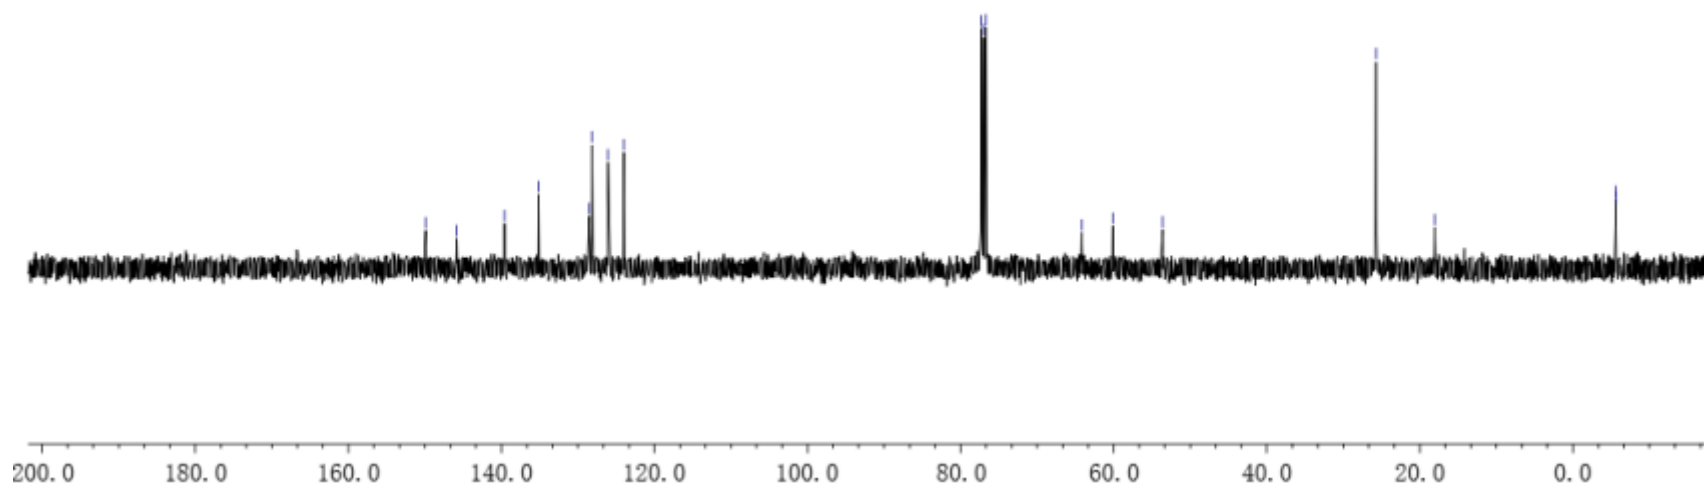

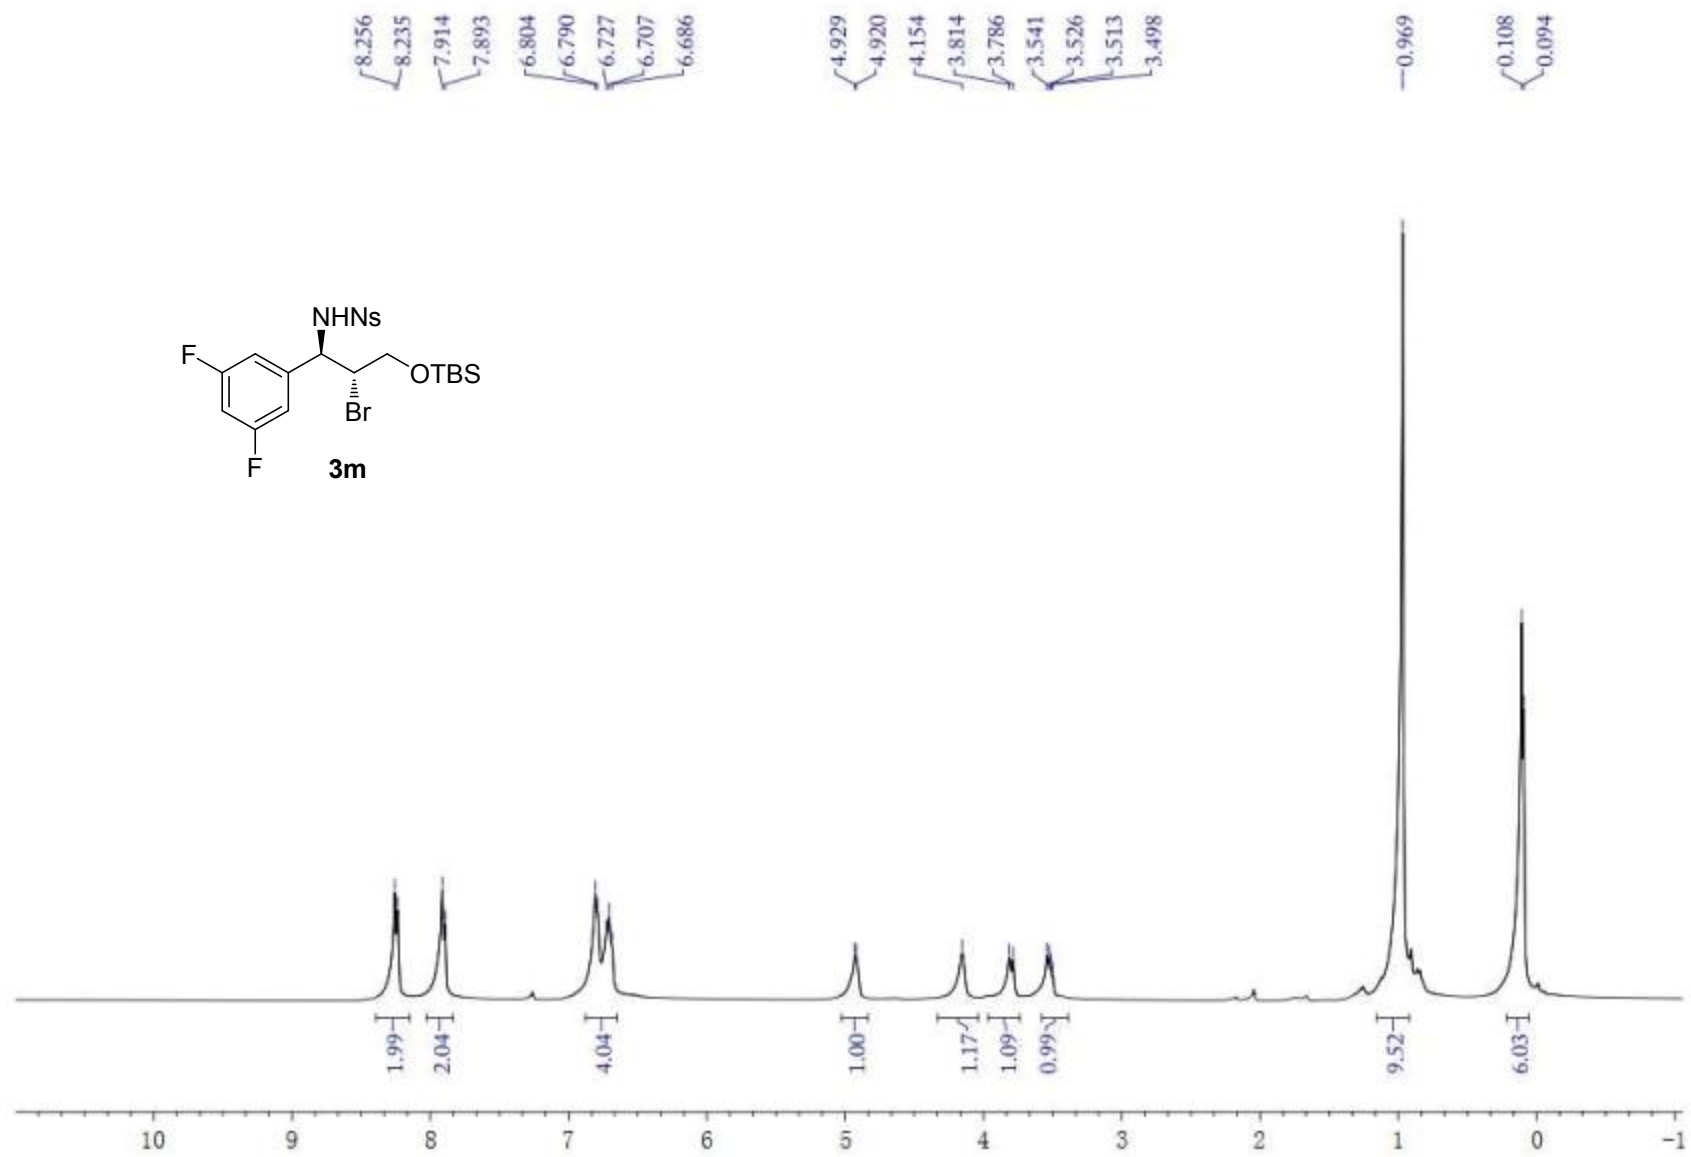

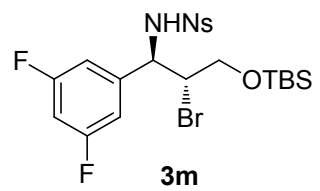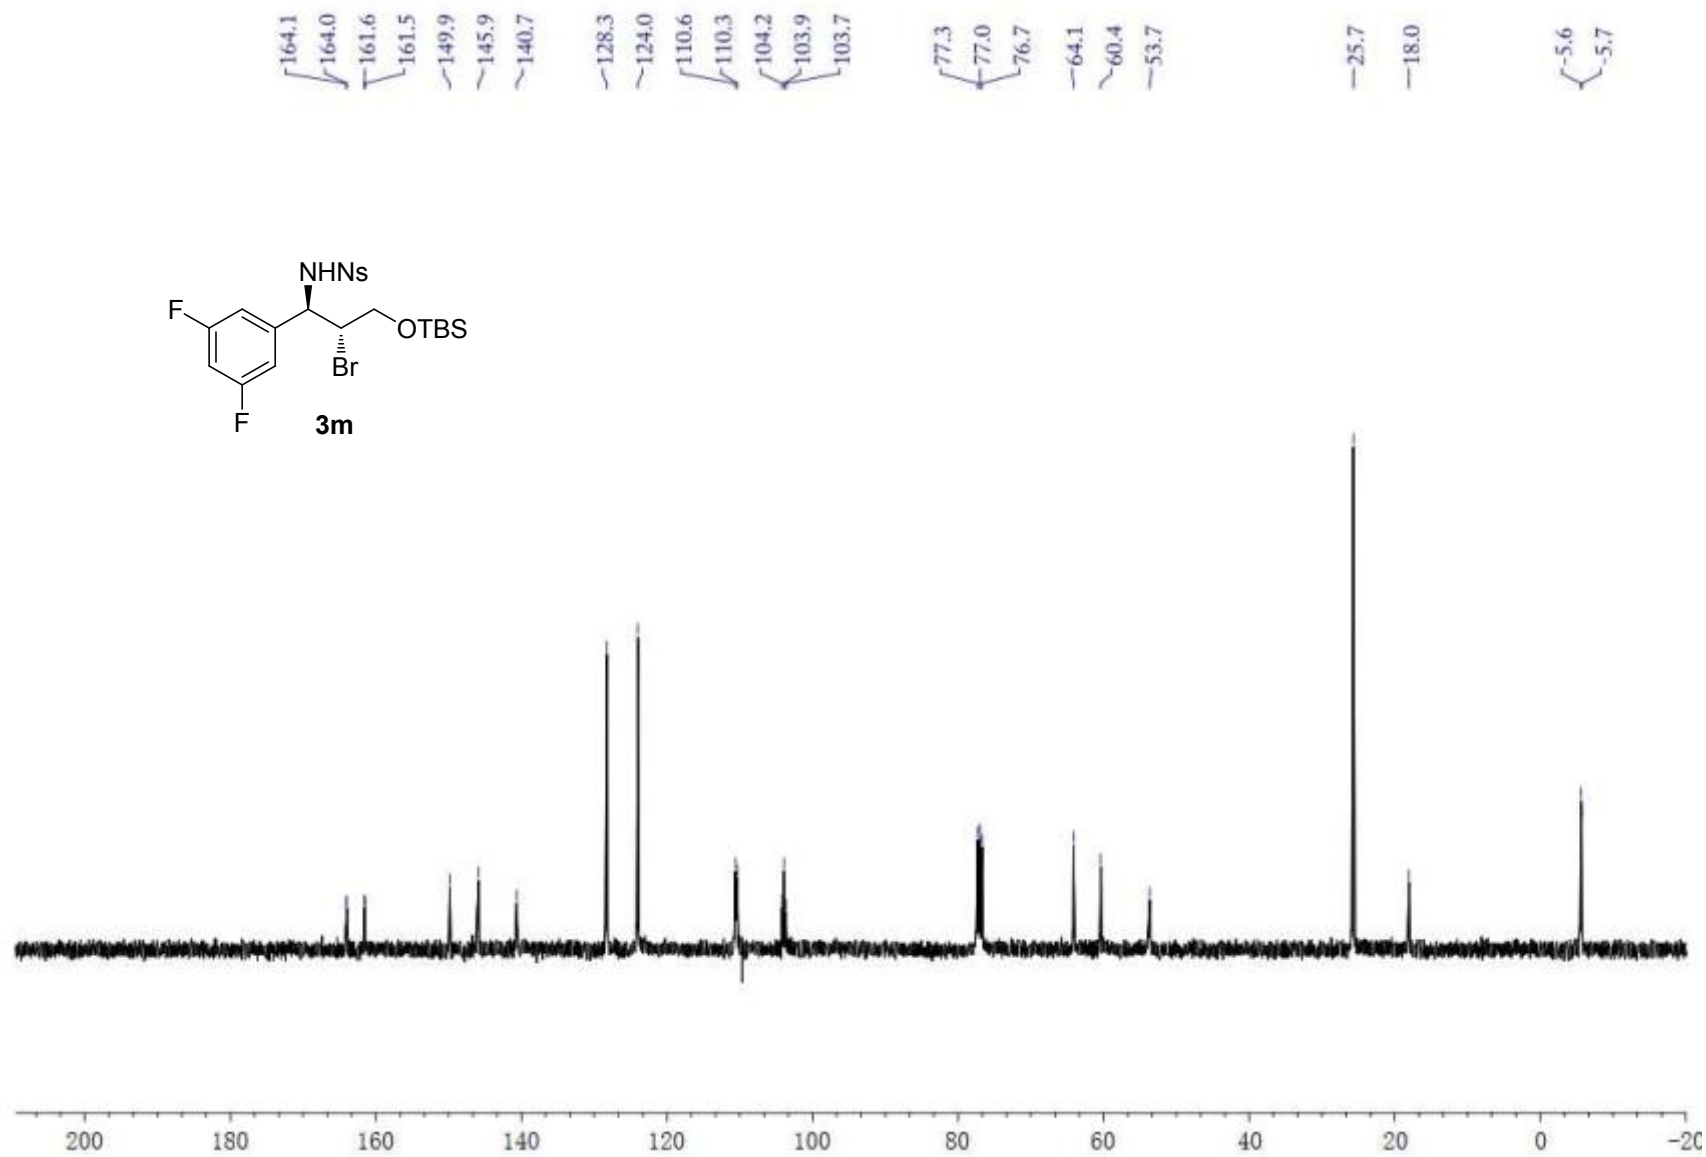

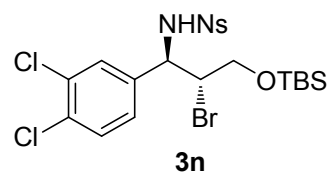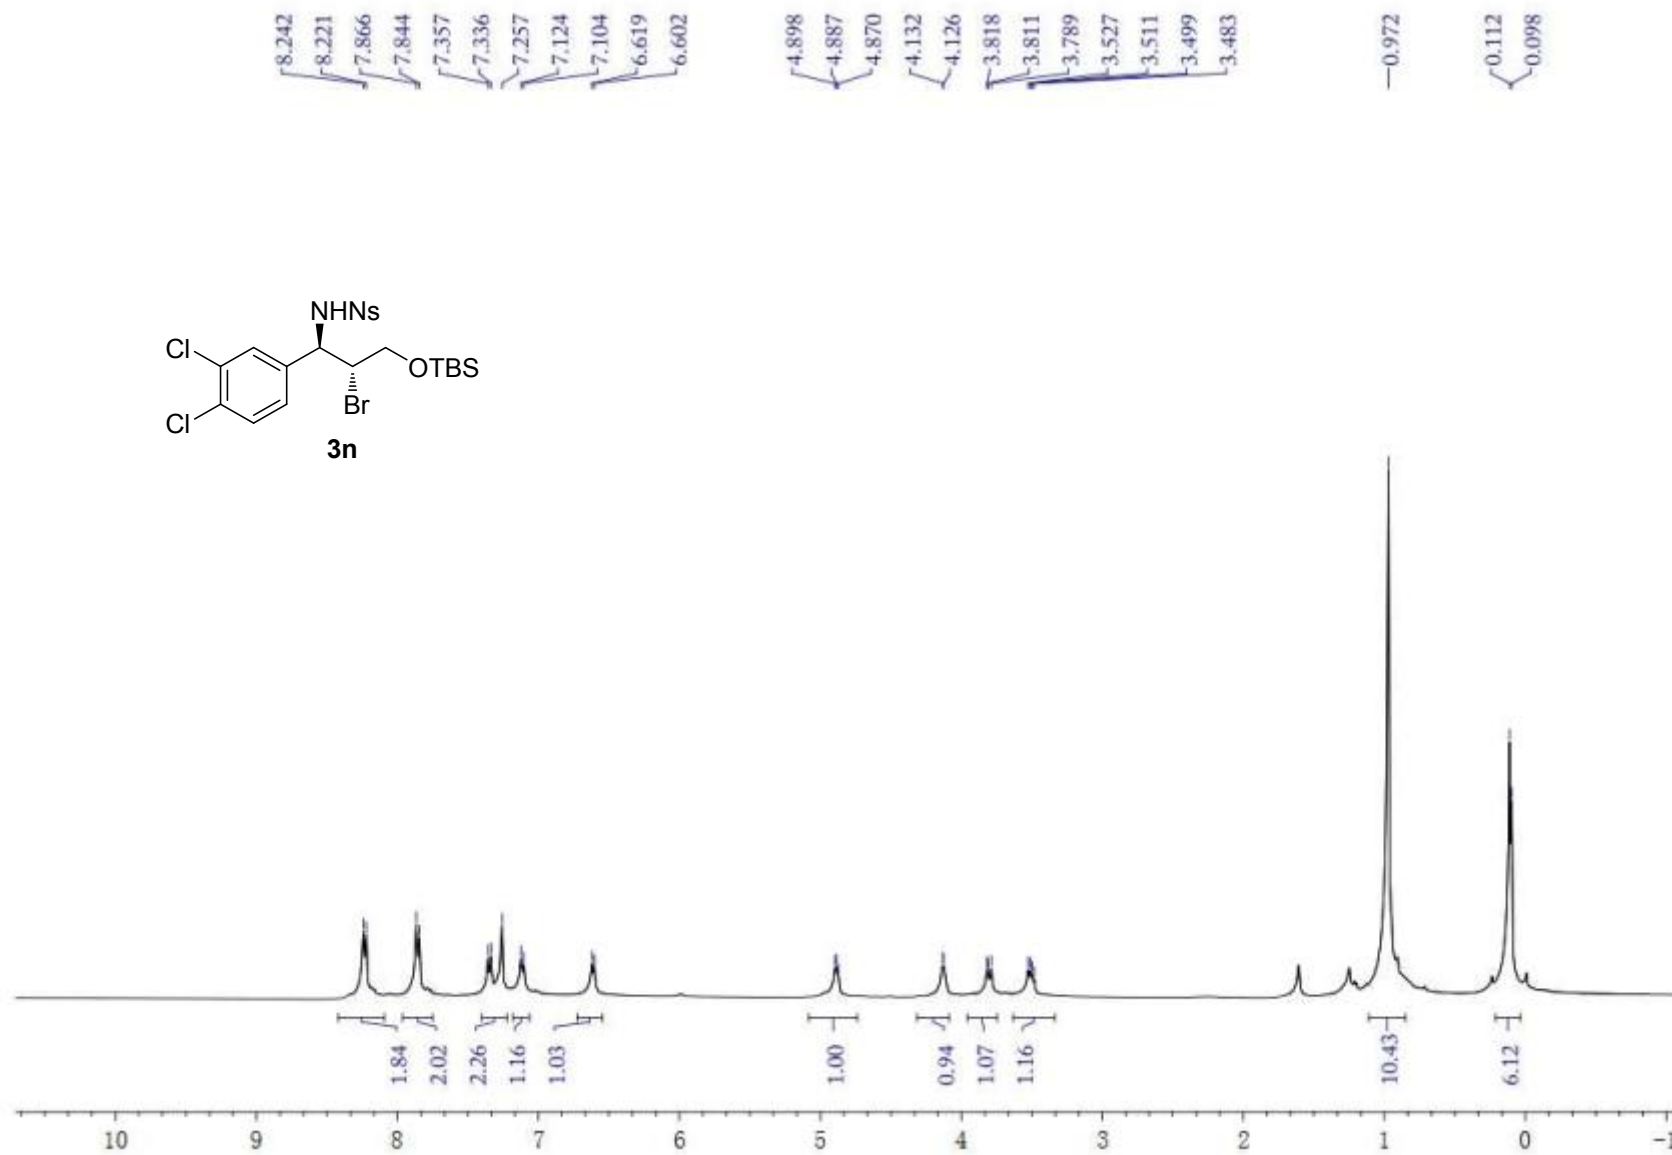

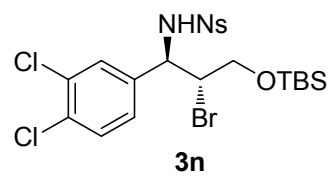

149.86  
145.92  
136.70  
132.79  
130.42  
129.40  
128.24  
126.80  
124.00

77.32  
77.00  
76.68  
64.17  
60.15  
53.85

25.72  
17.94

-5.56  
-5.62

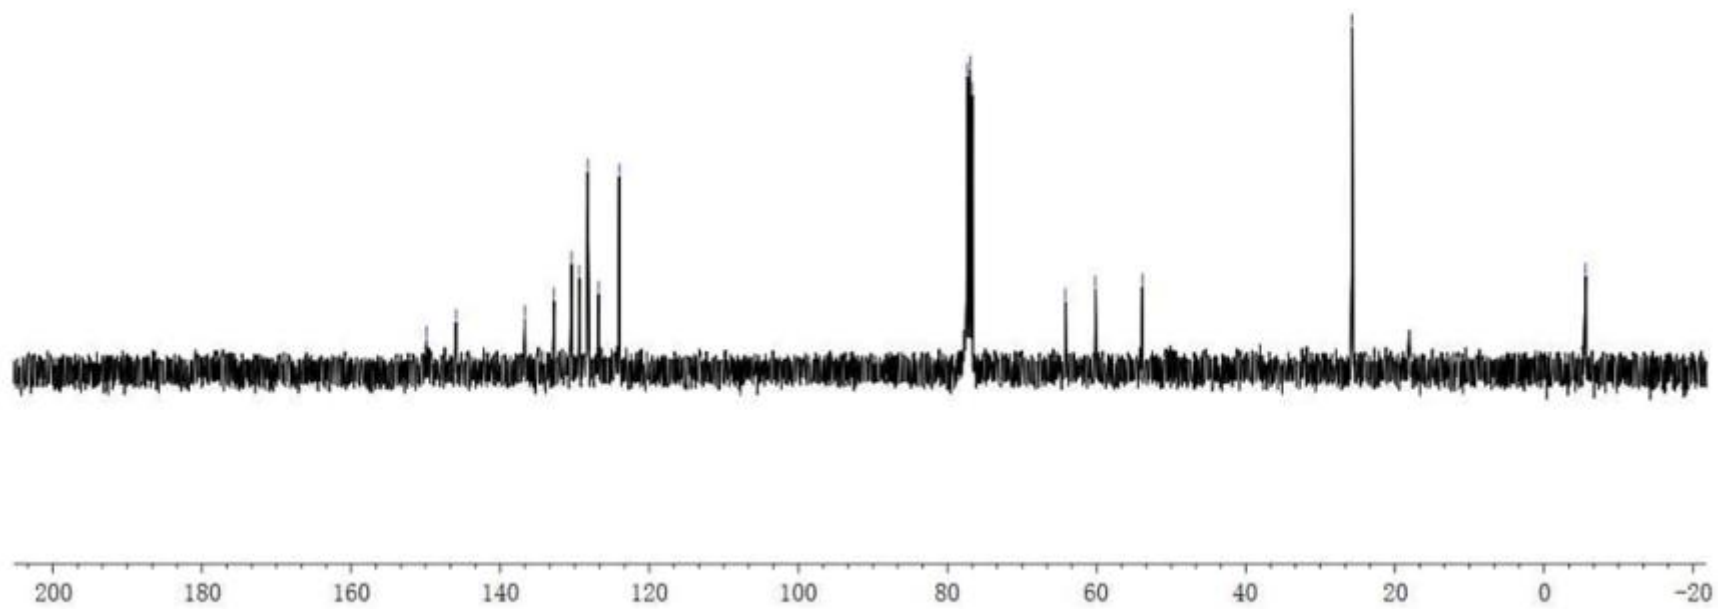

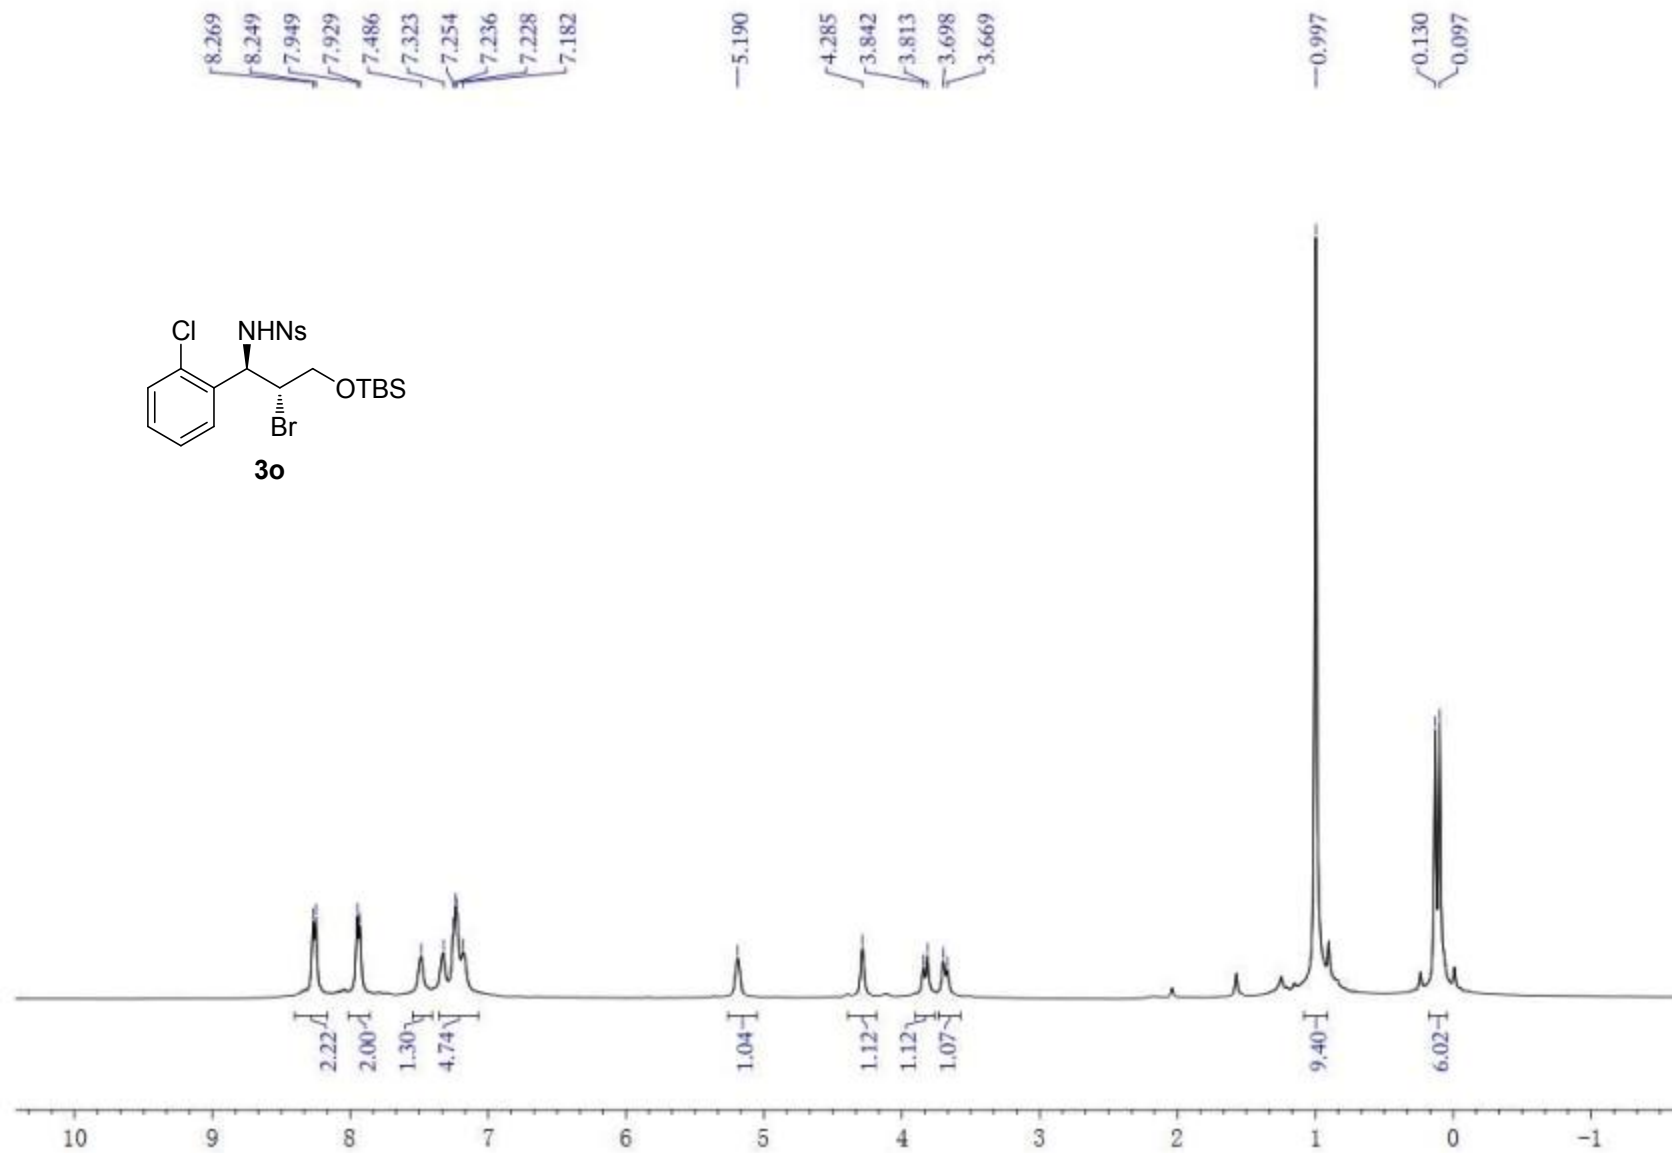

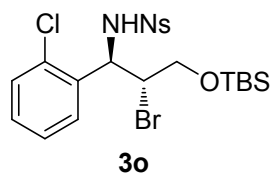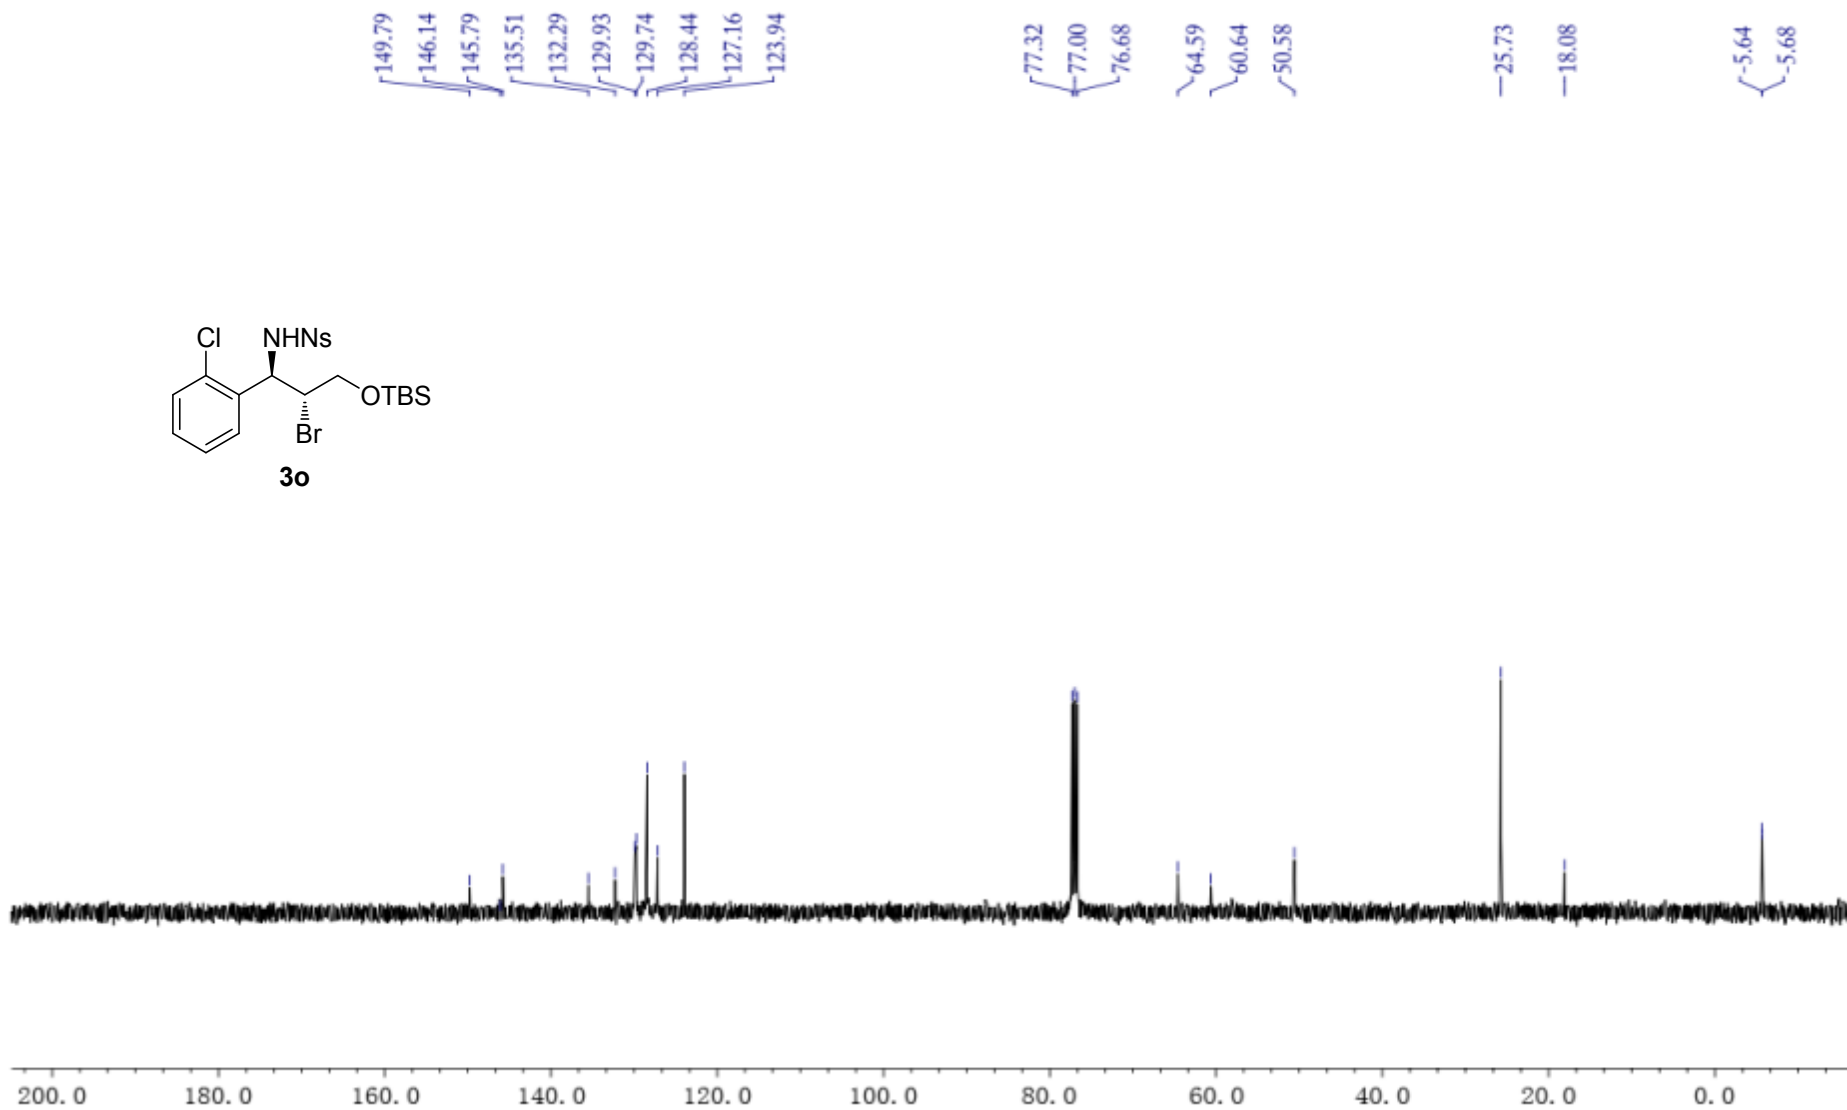

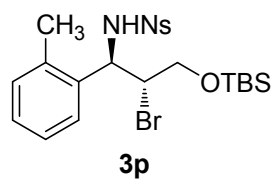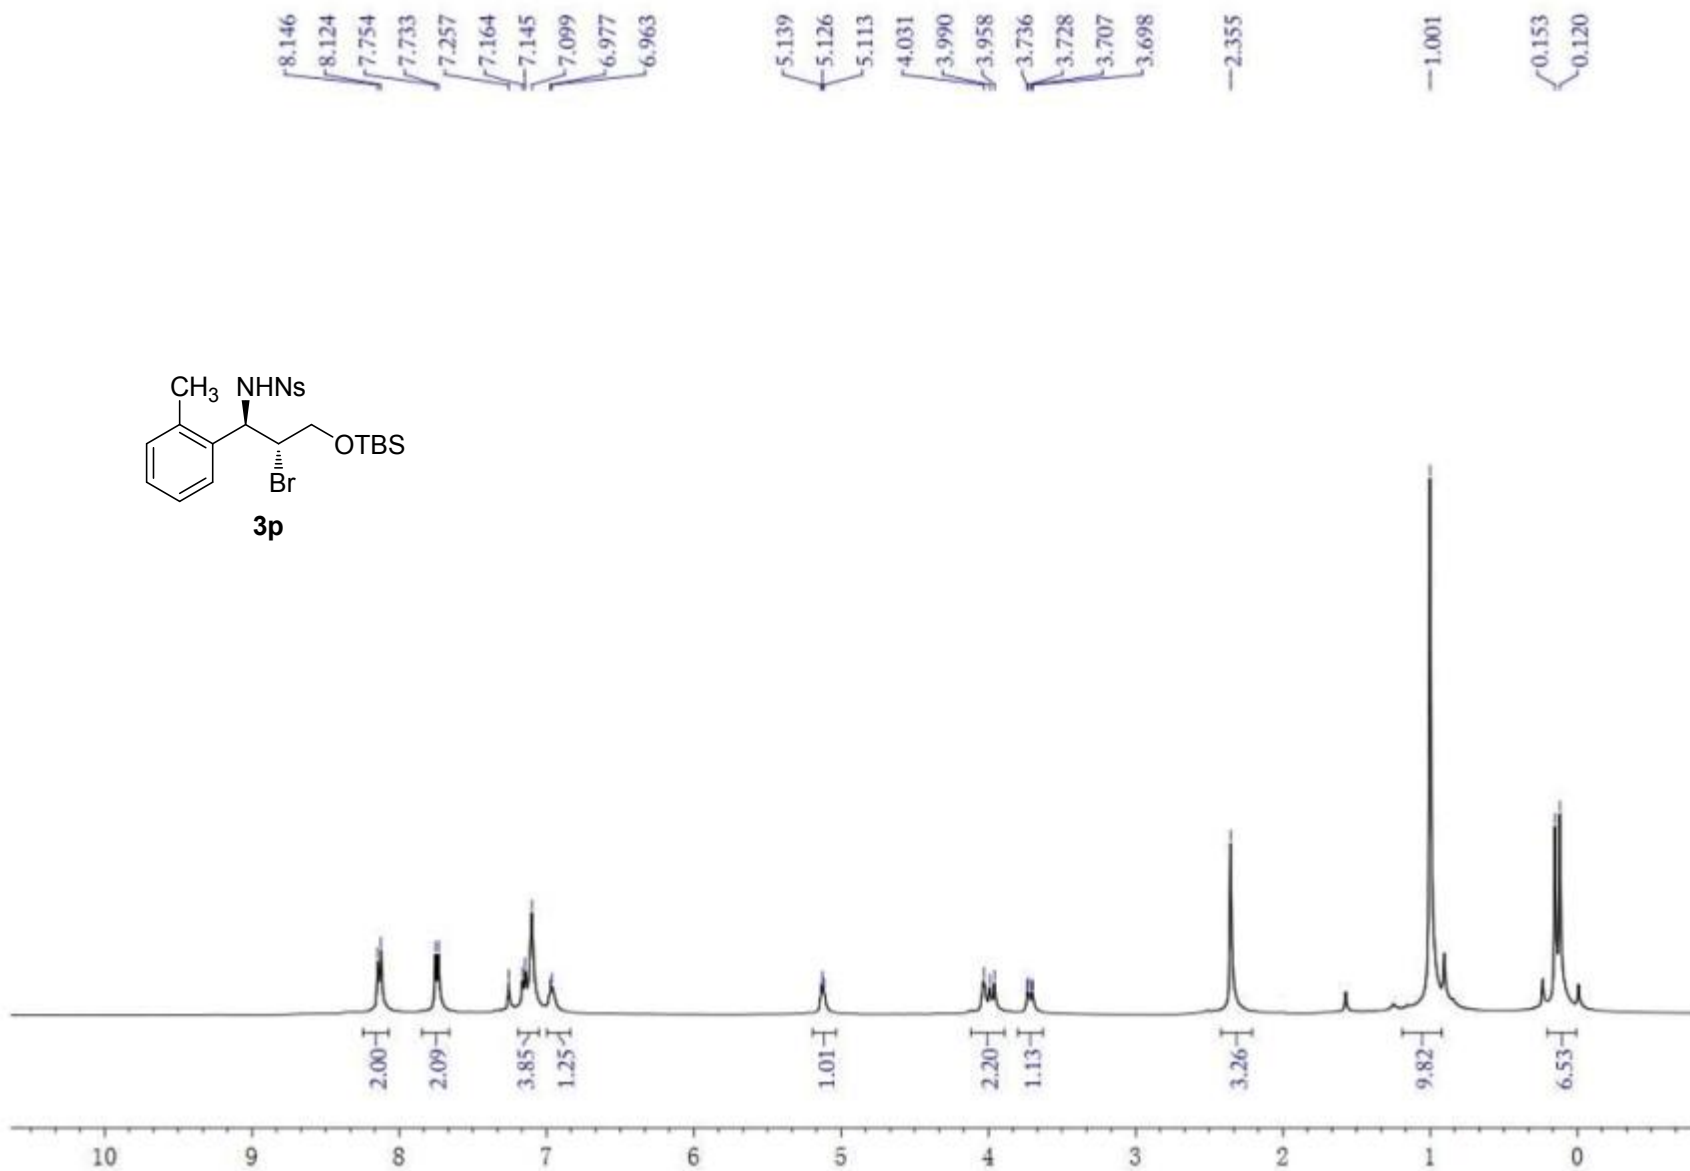



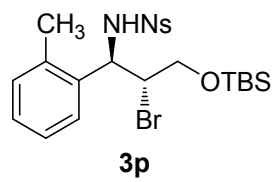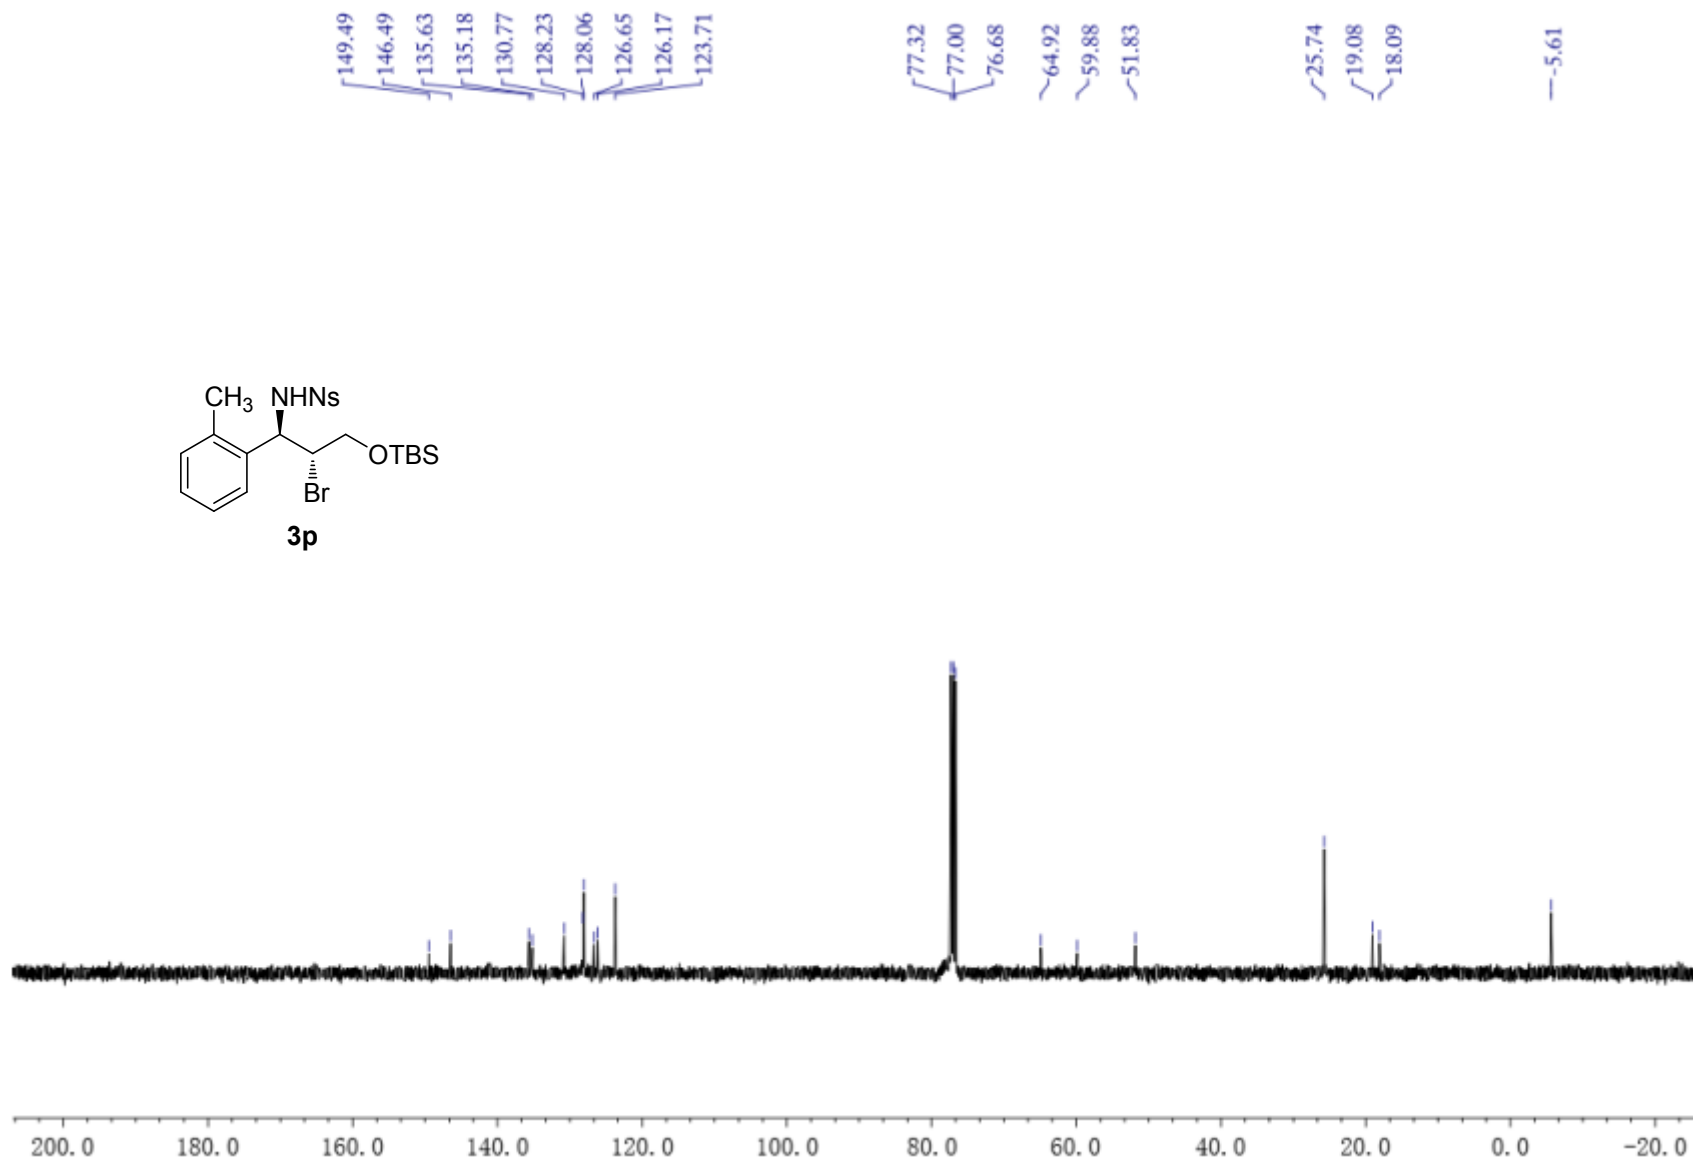

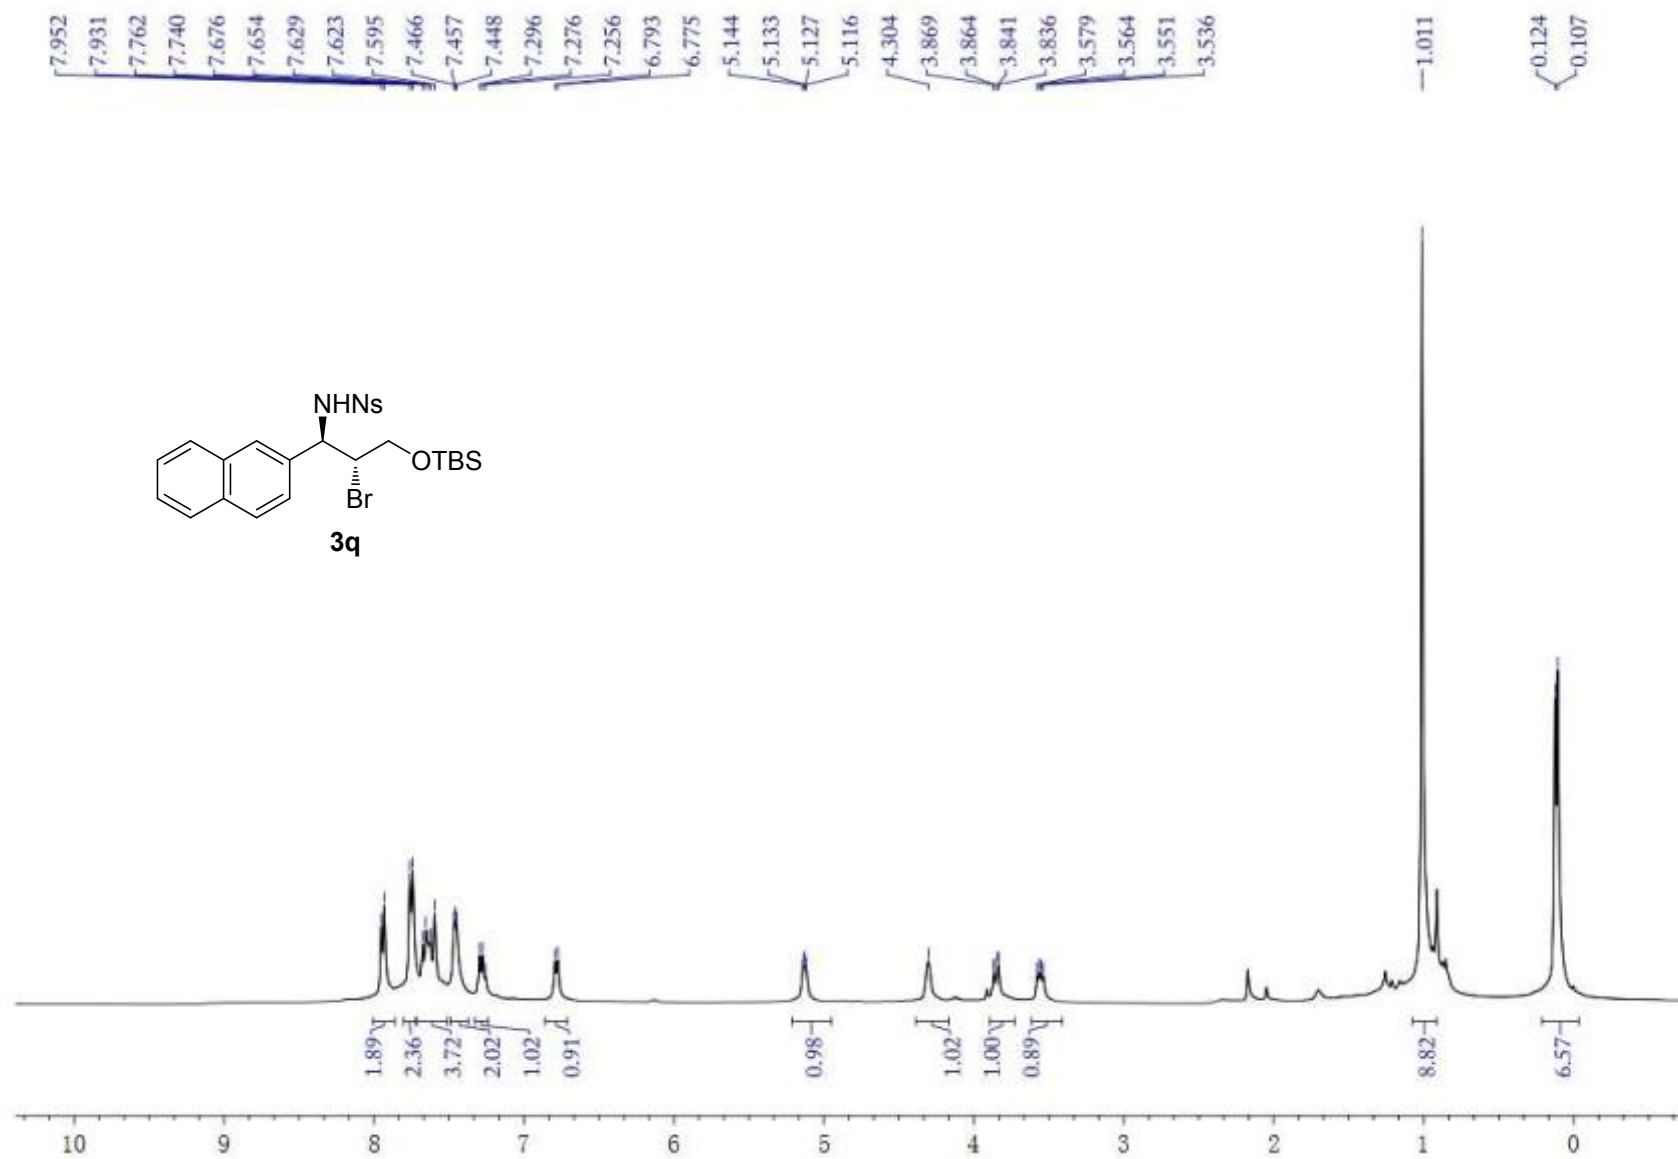

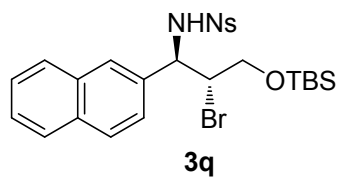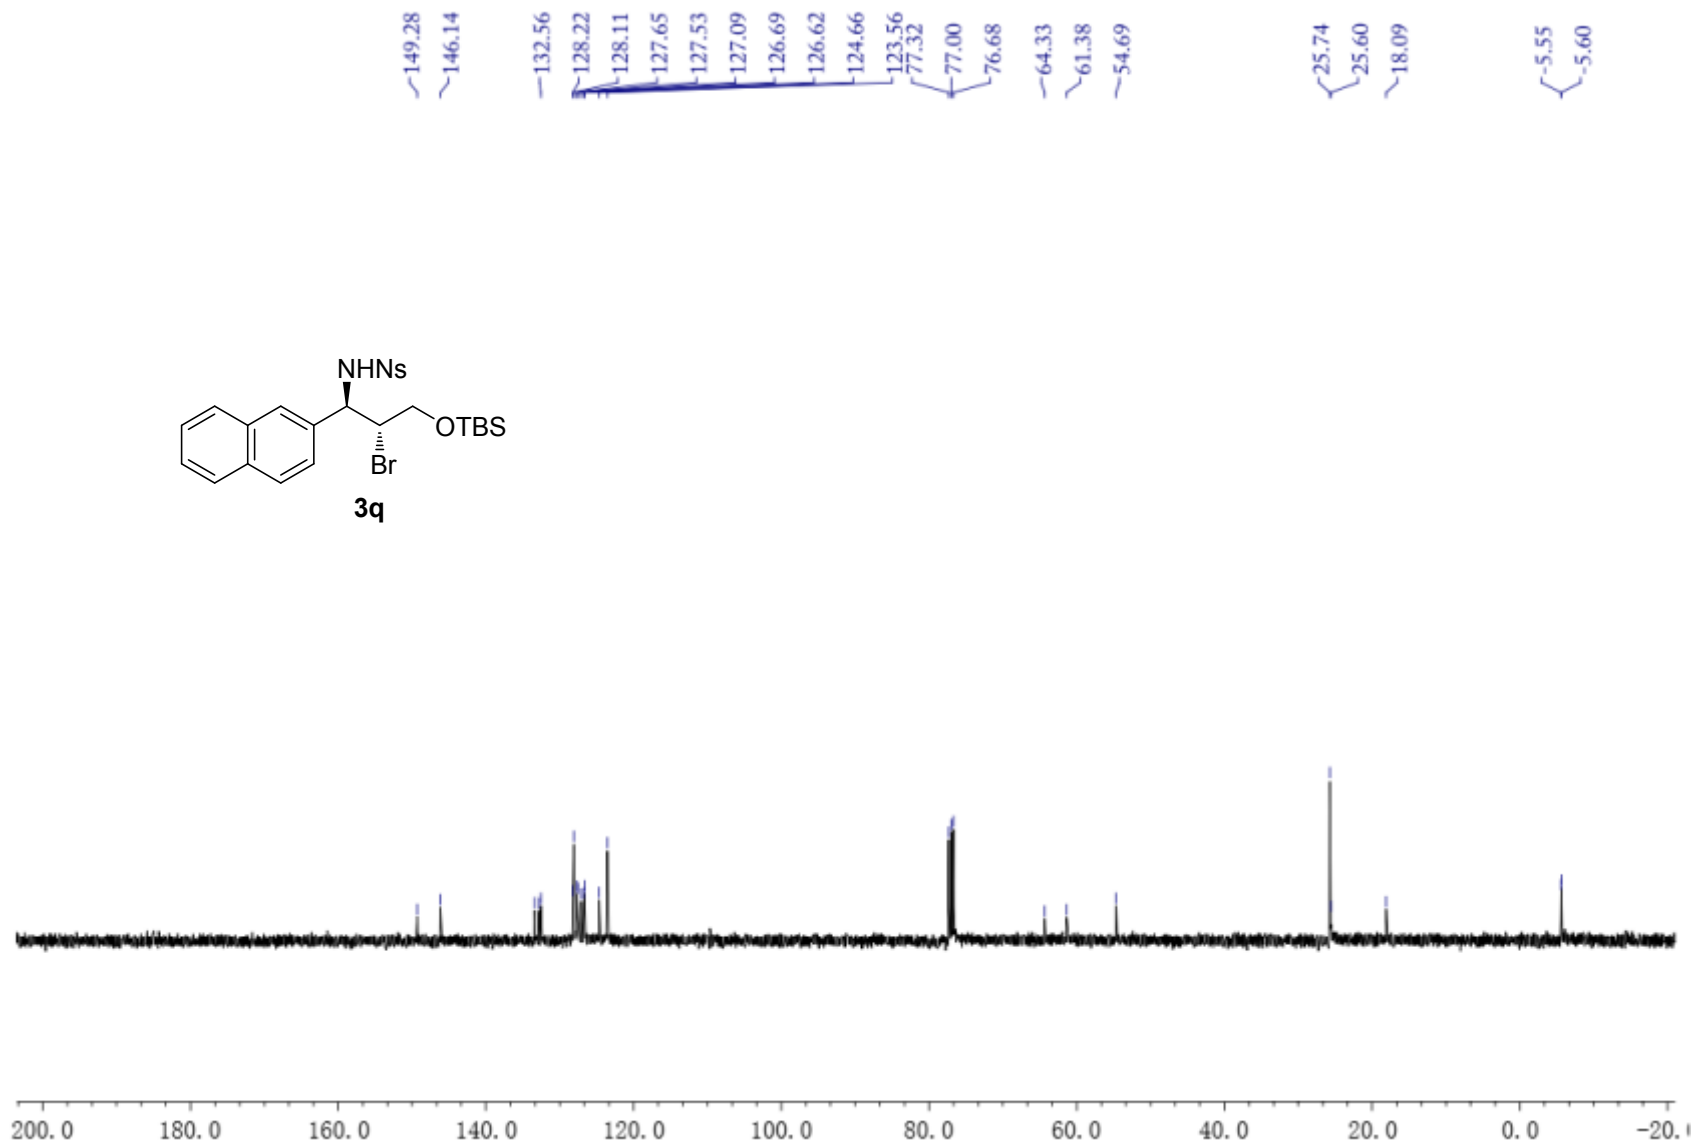

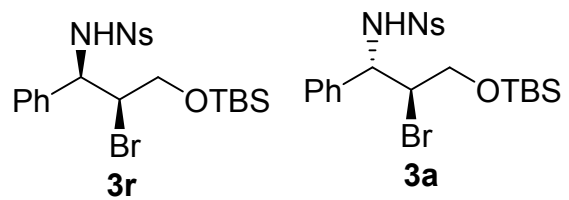

**3r:3a = 6:1**

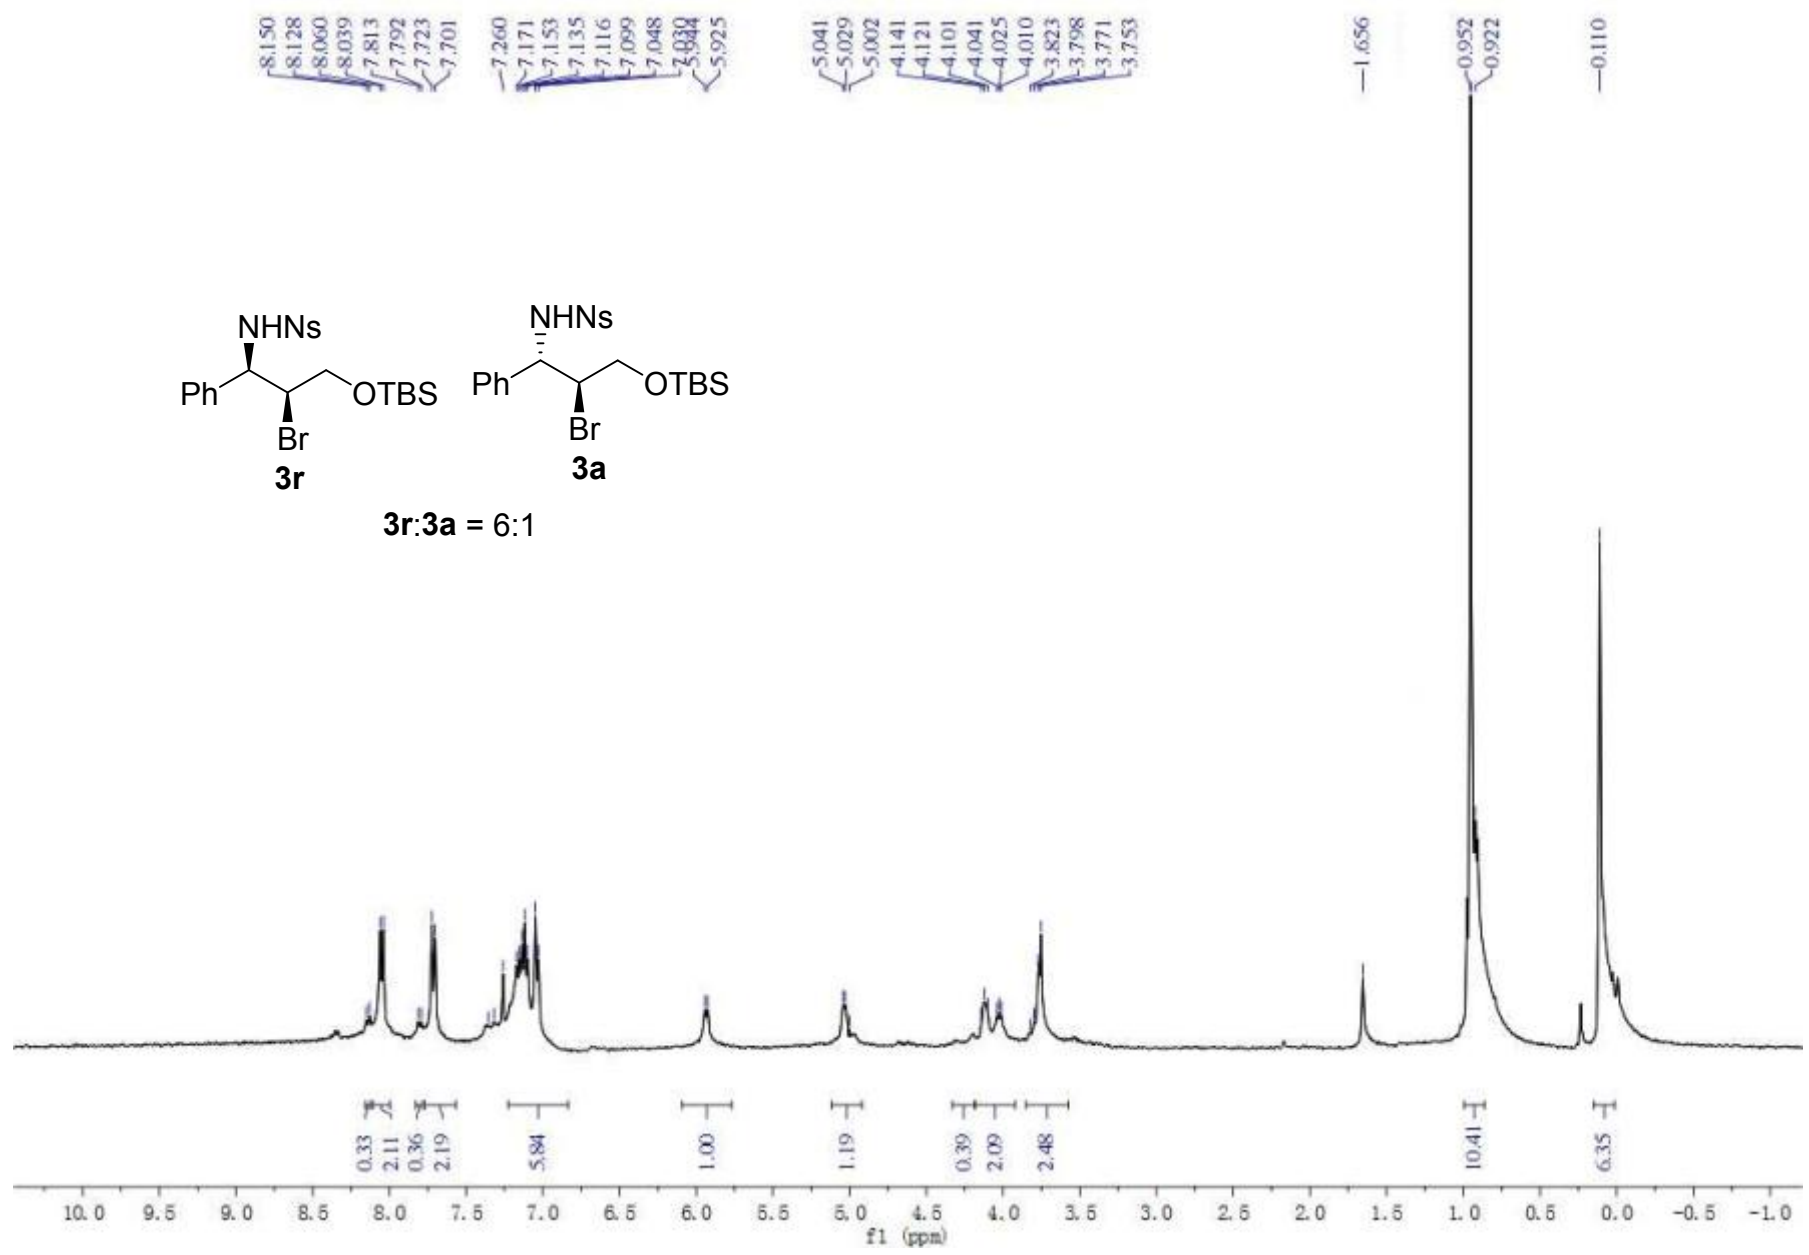

— 149.540  
— 146.196  
— 136.221  
128.242  
128.193  
128.136  
127.370  
123.684

77.318  
77.000  
76.682

64.434  
64.023  
58.309  
57.178

25.771  
25.333  
— 18.137

— 5.457  
— 5.489

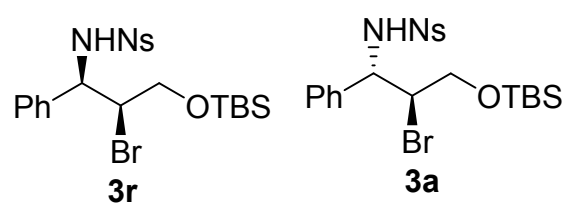

**3r:3a = 6:1**

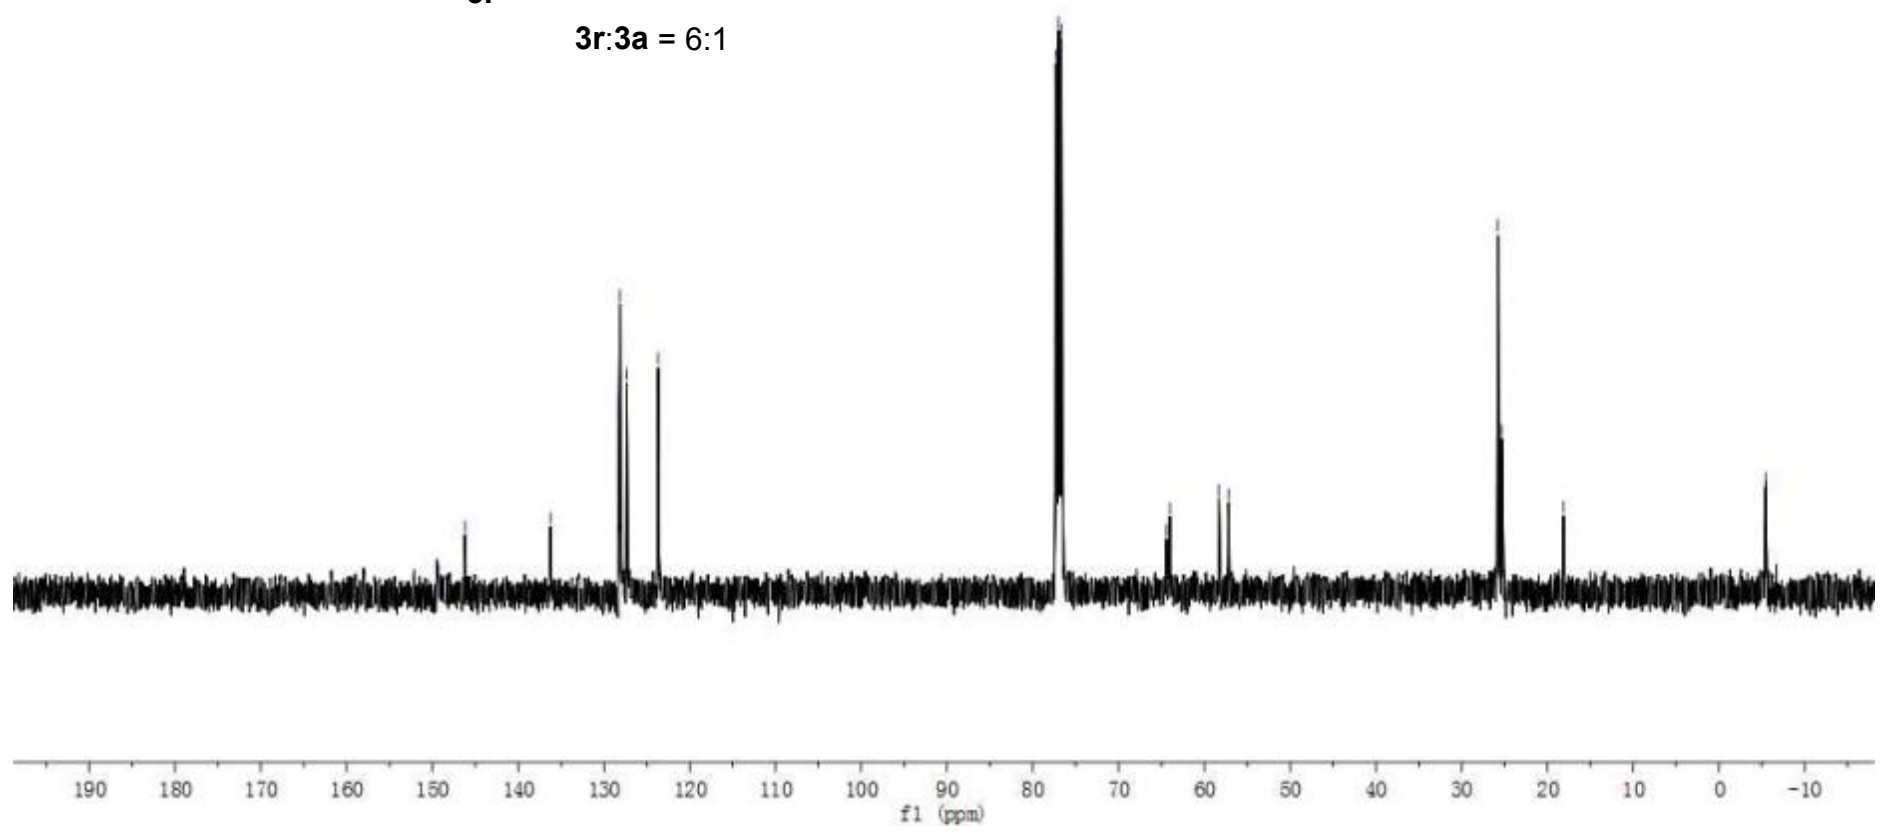

8.384  
8.363  
8.171  
8.150

3.808  
3.801  
3.779  
3.771  
3.574  
3.560  
3.545  
3.531  
3.053  
2.766  
2.748  
2.324  
2.313

-0.784  
-0.626

-0.035  
-0.051

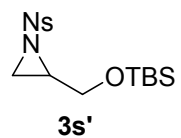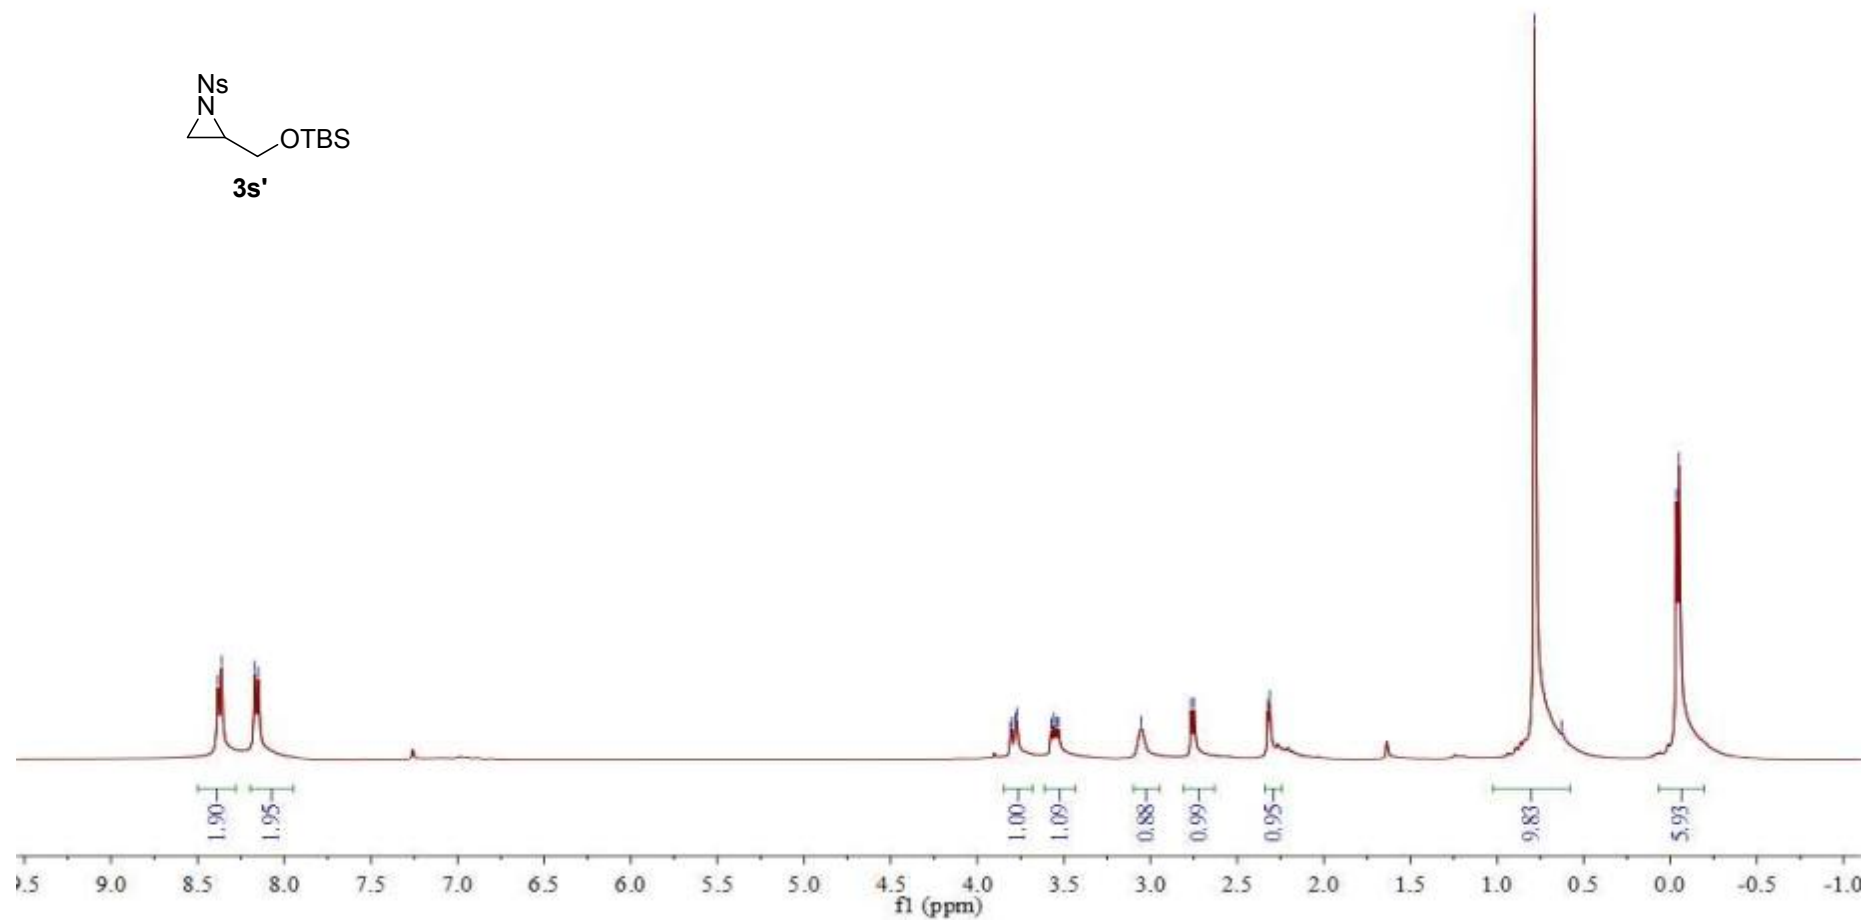

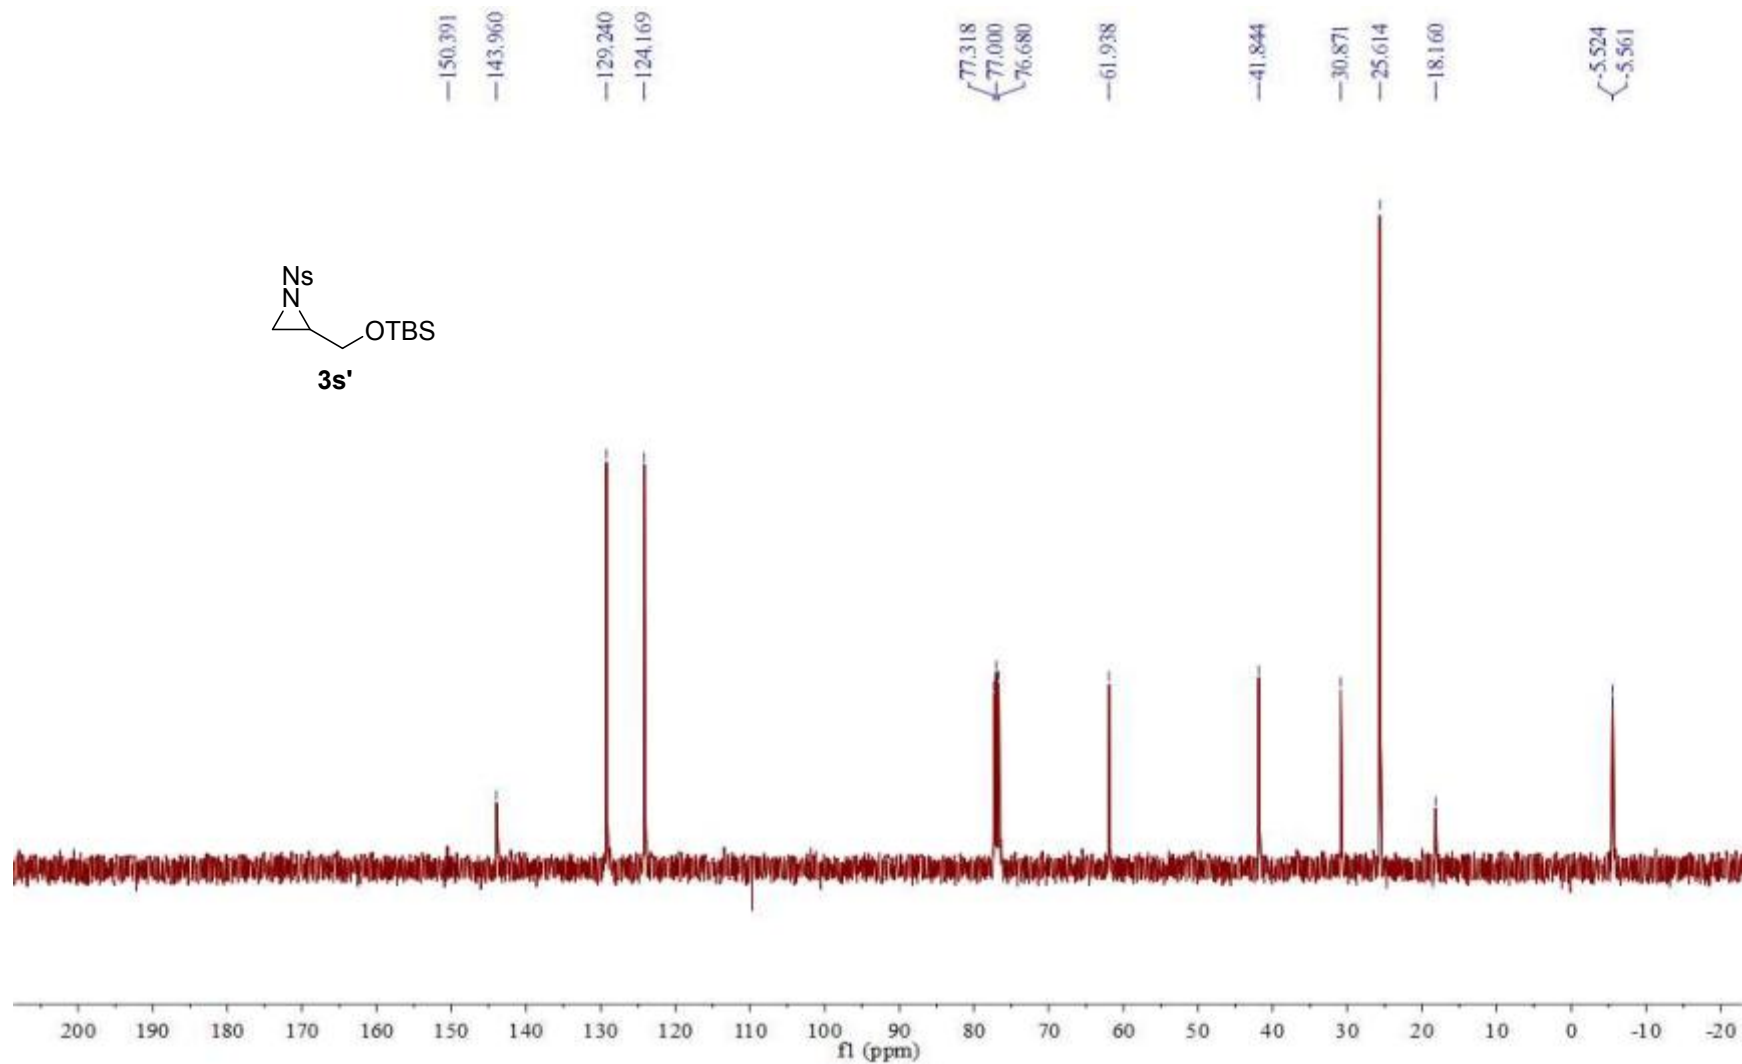

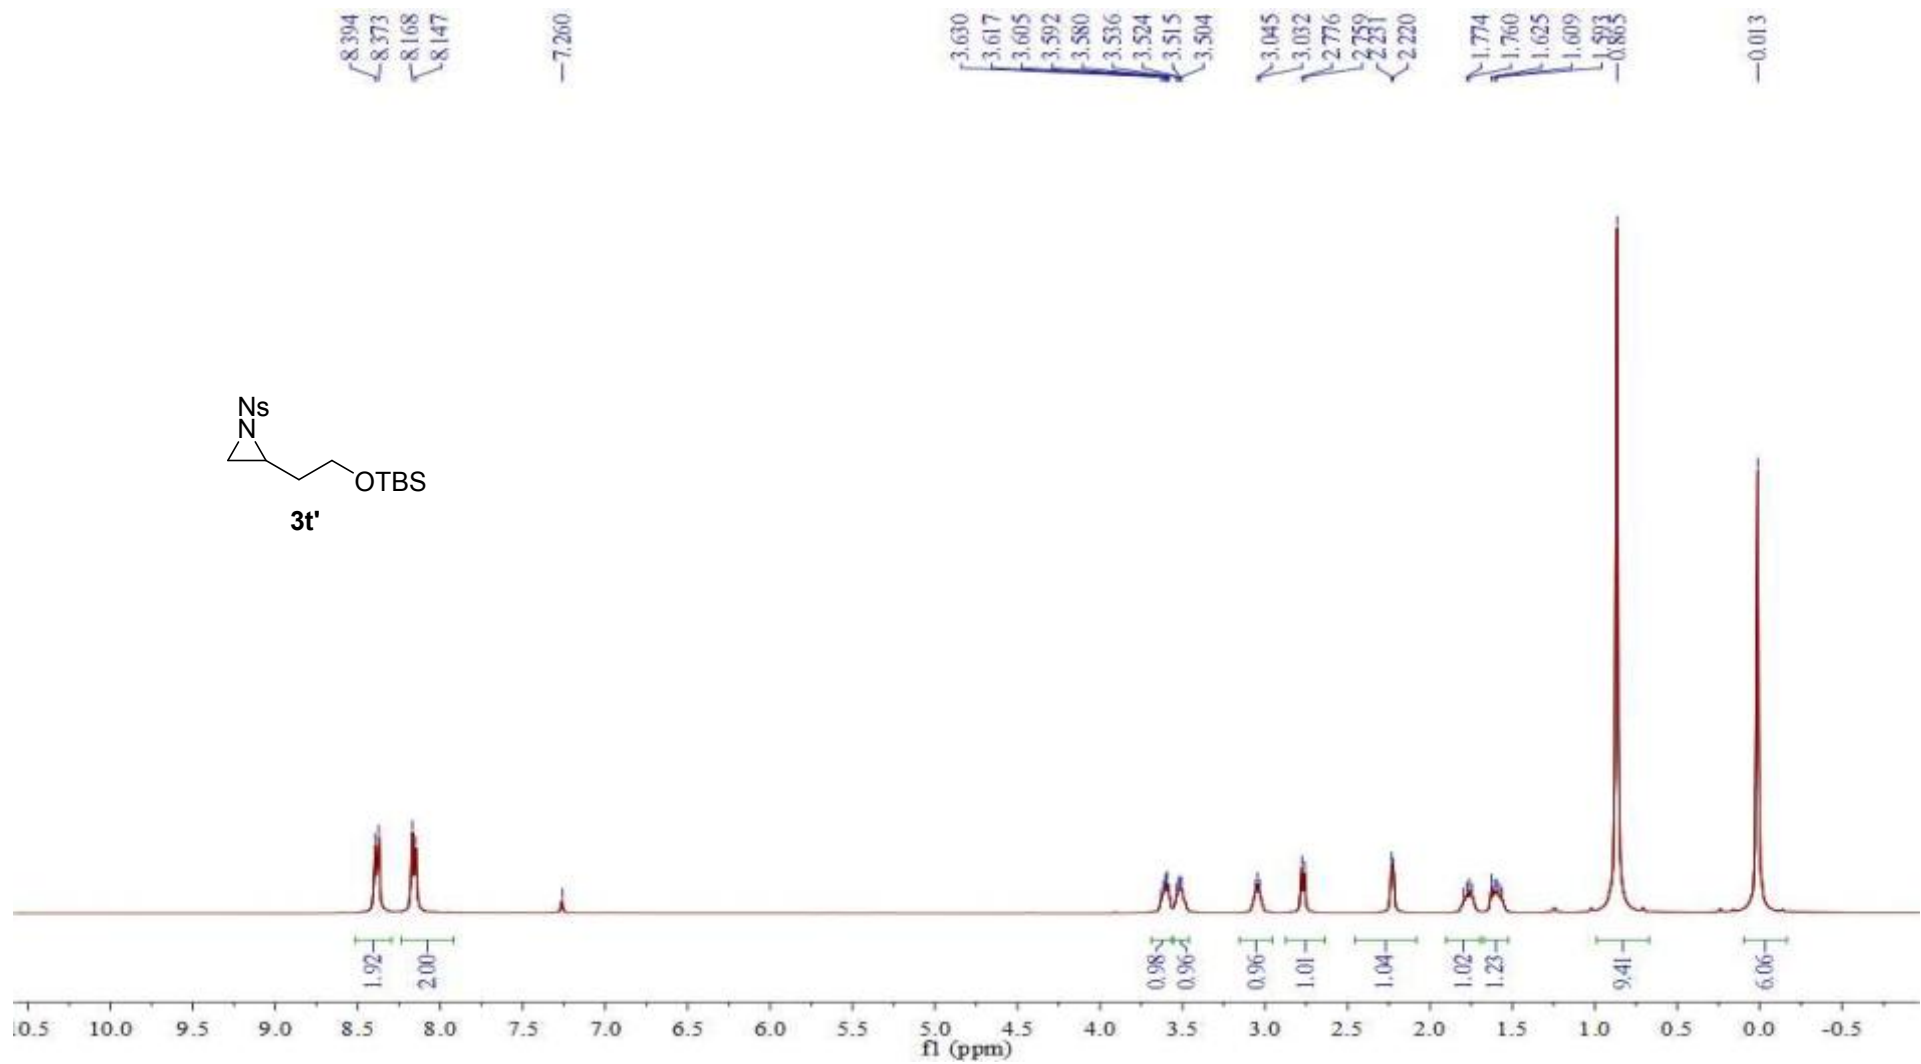



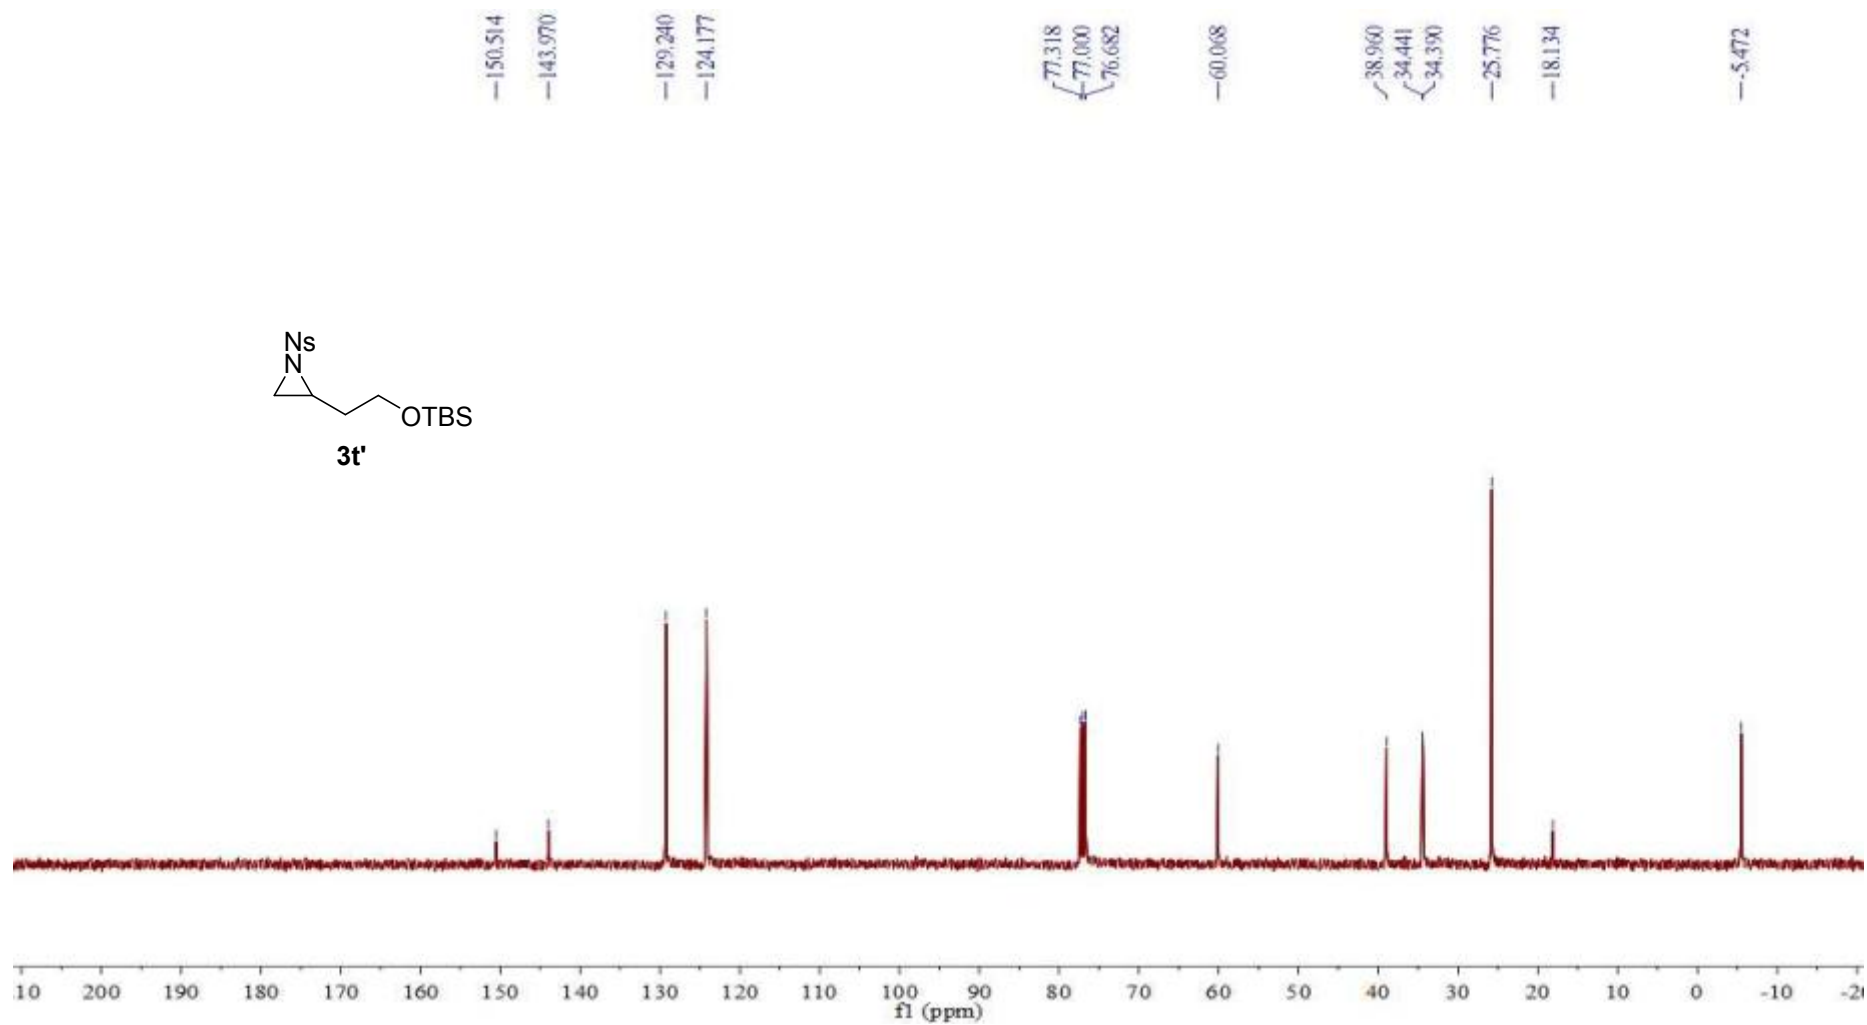

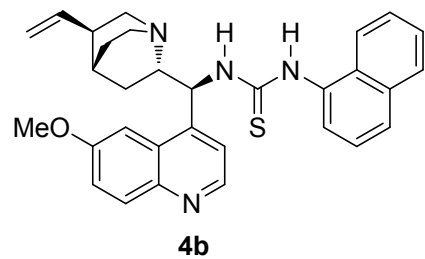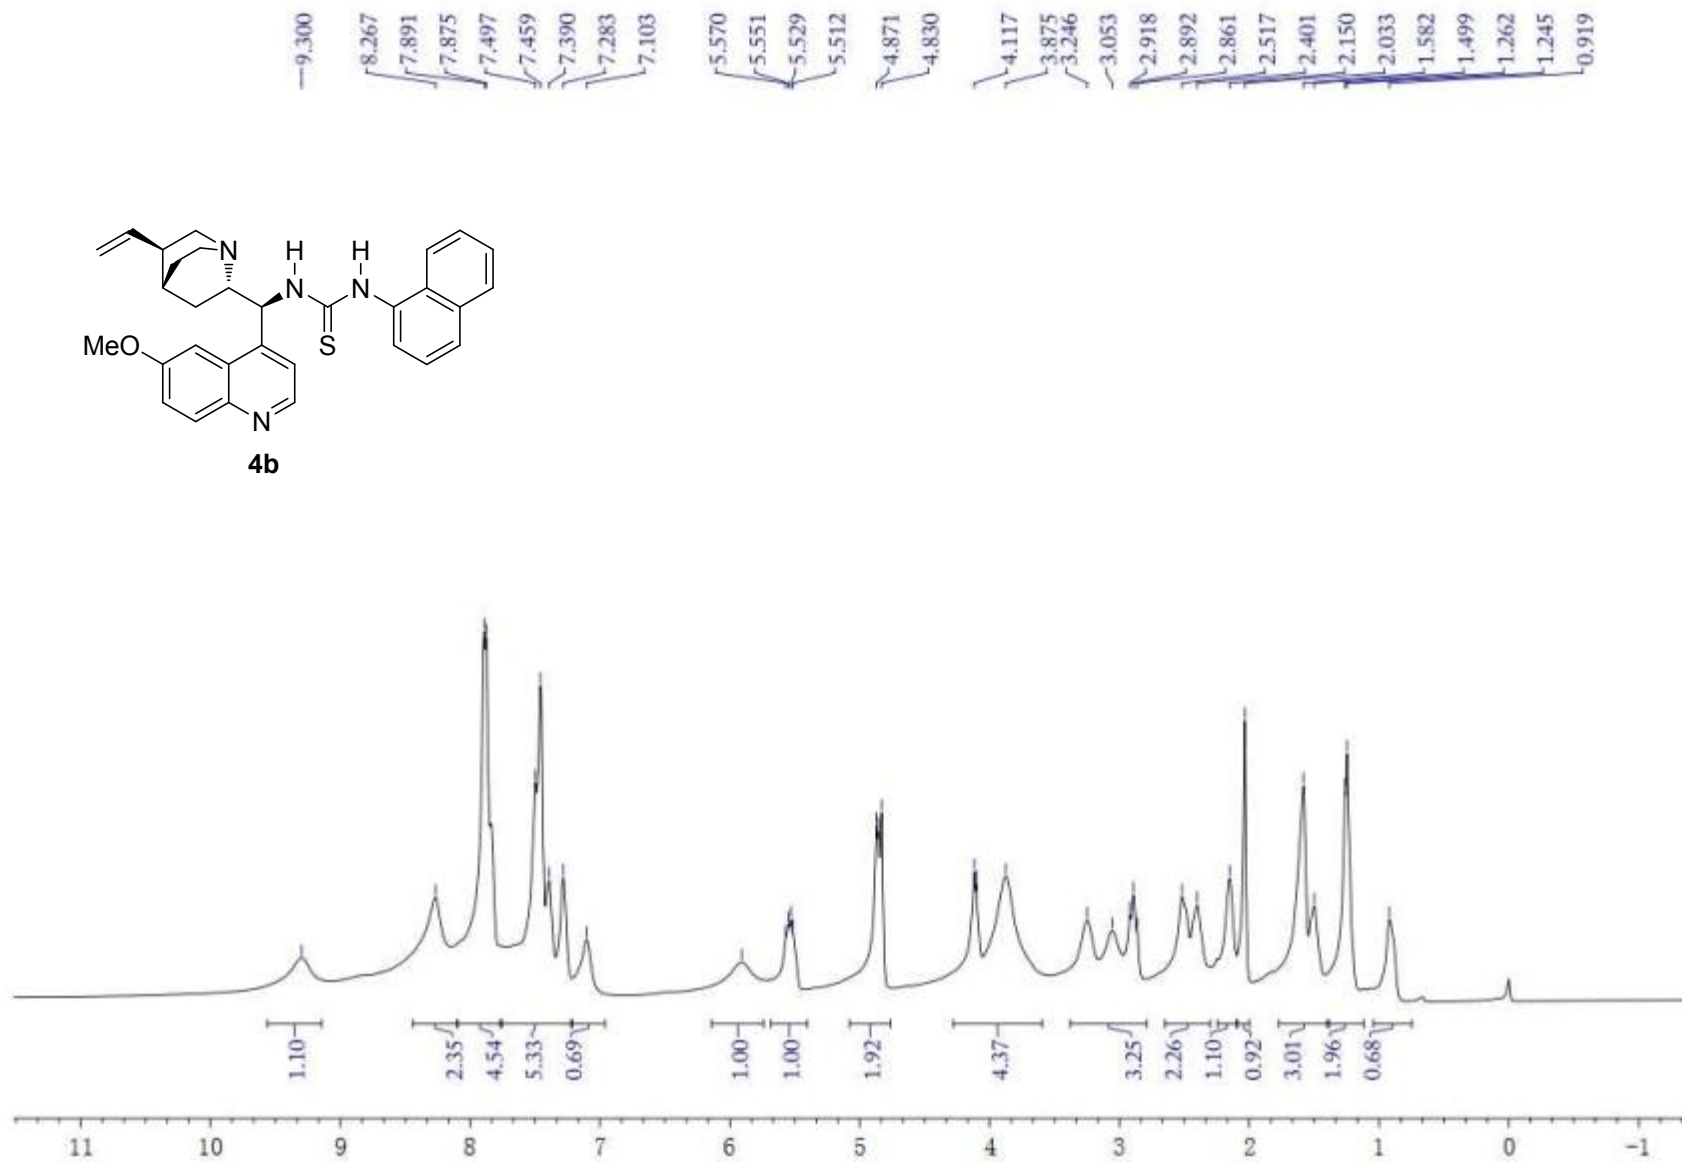

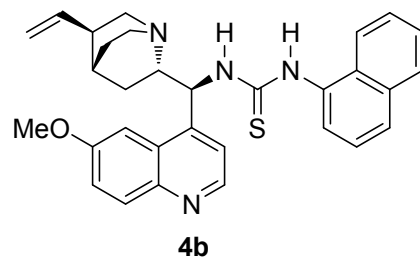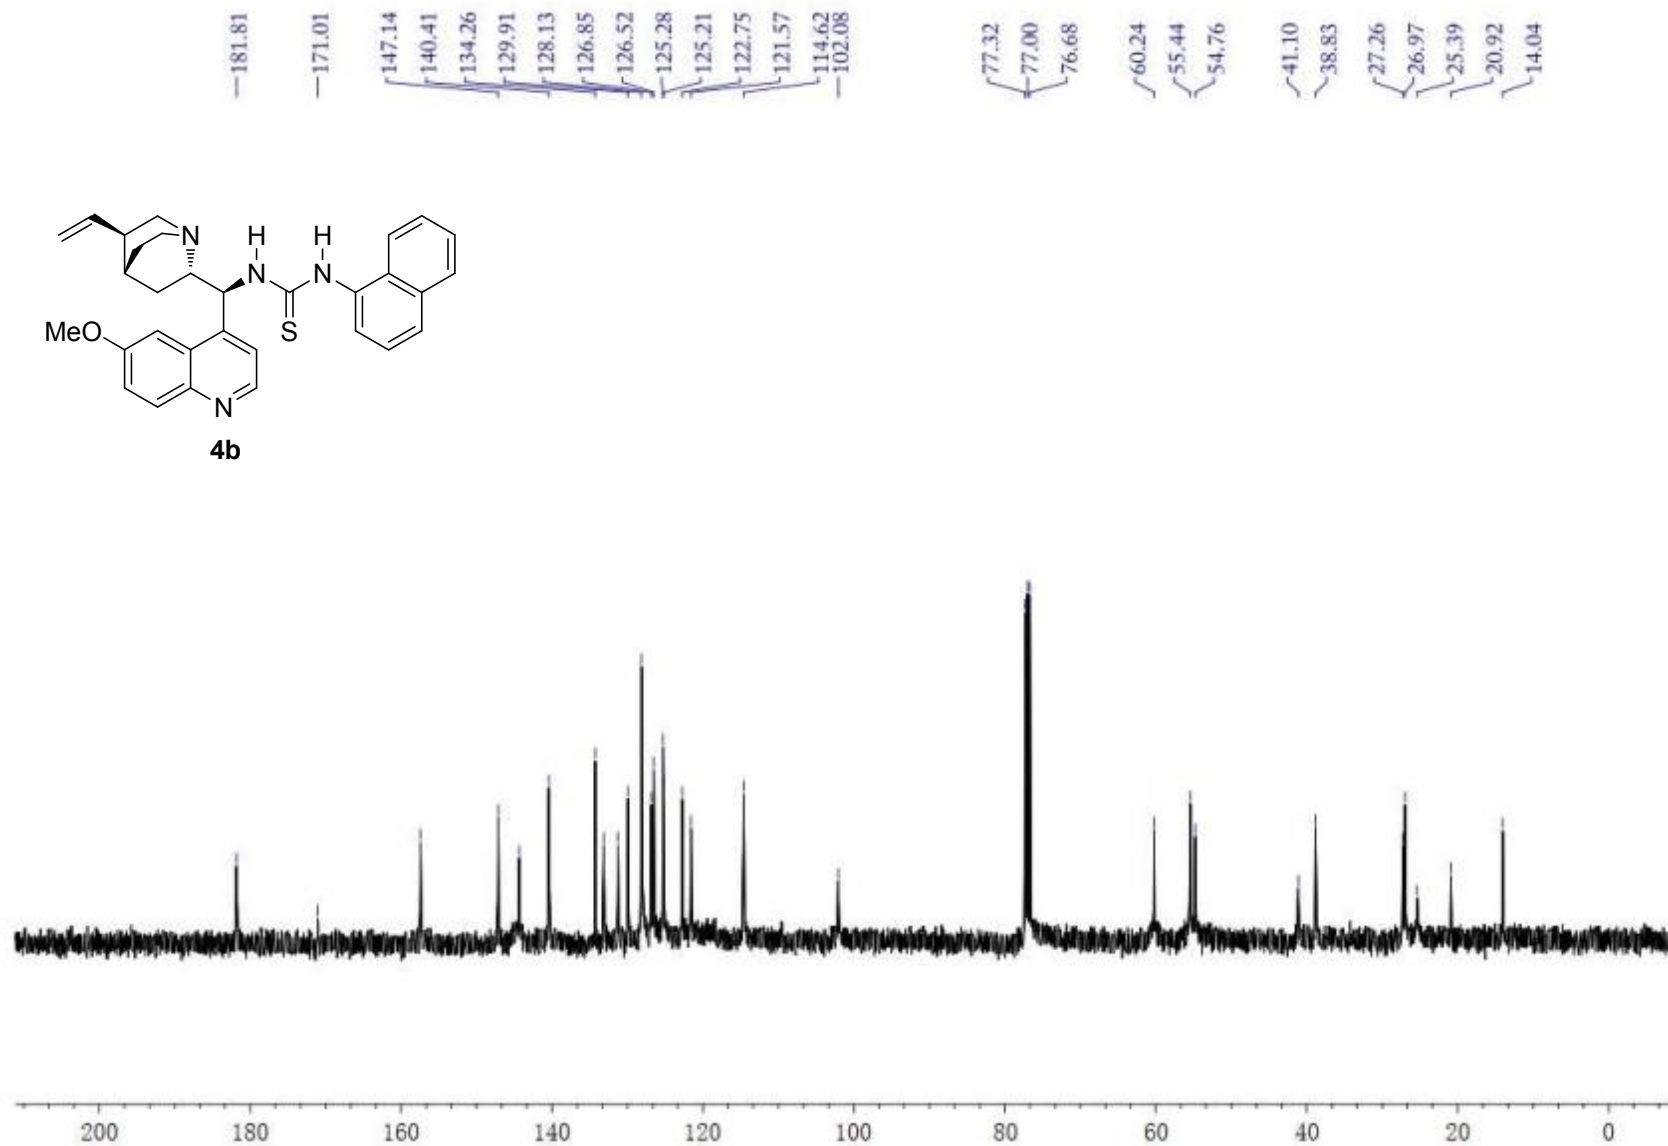

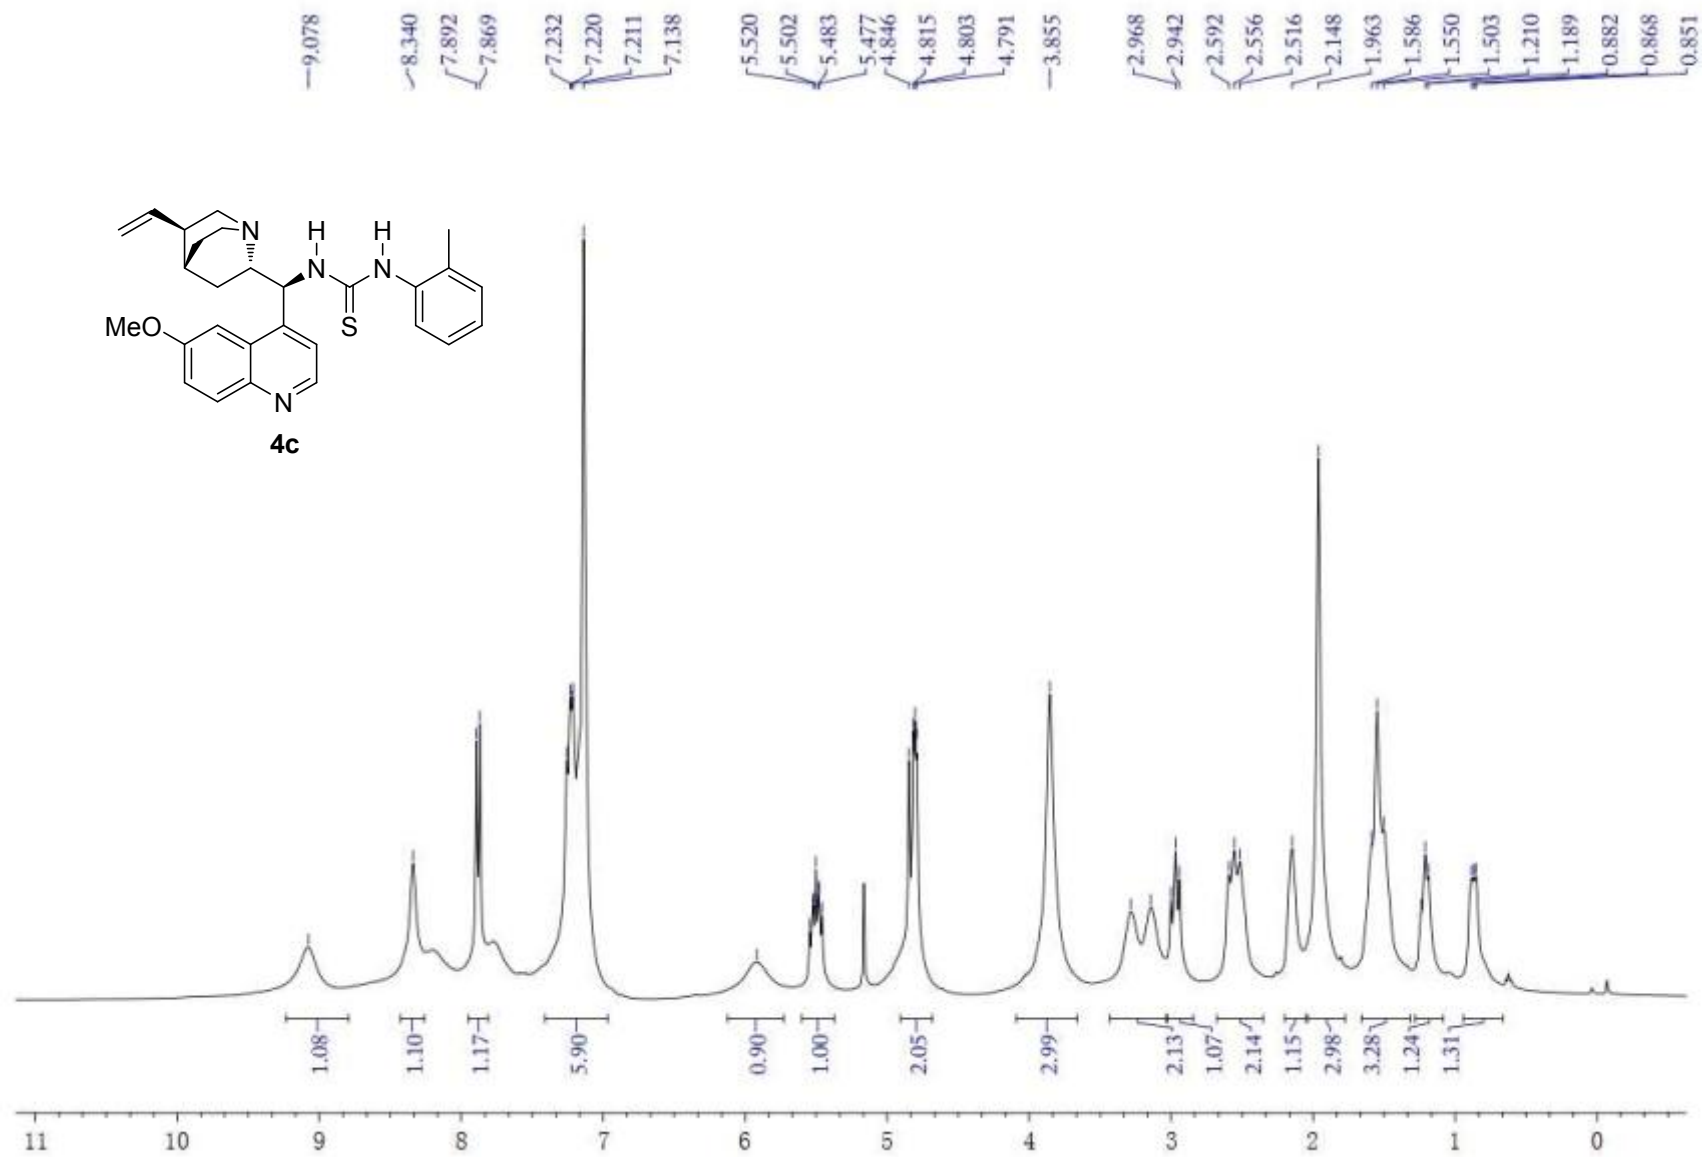

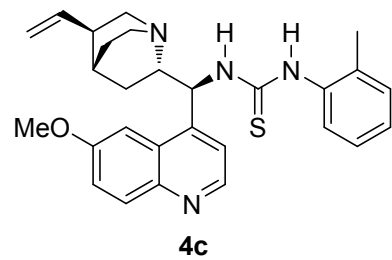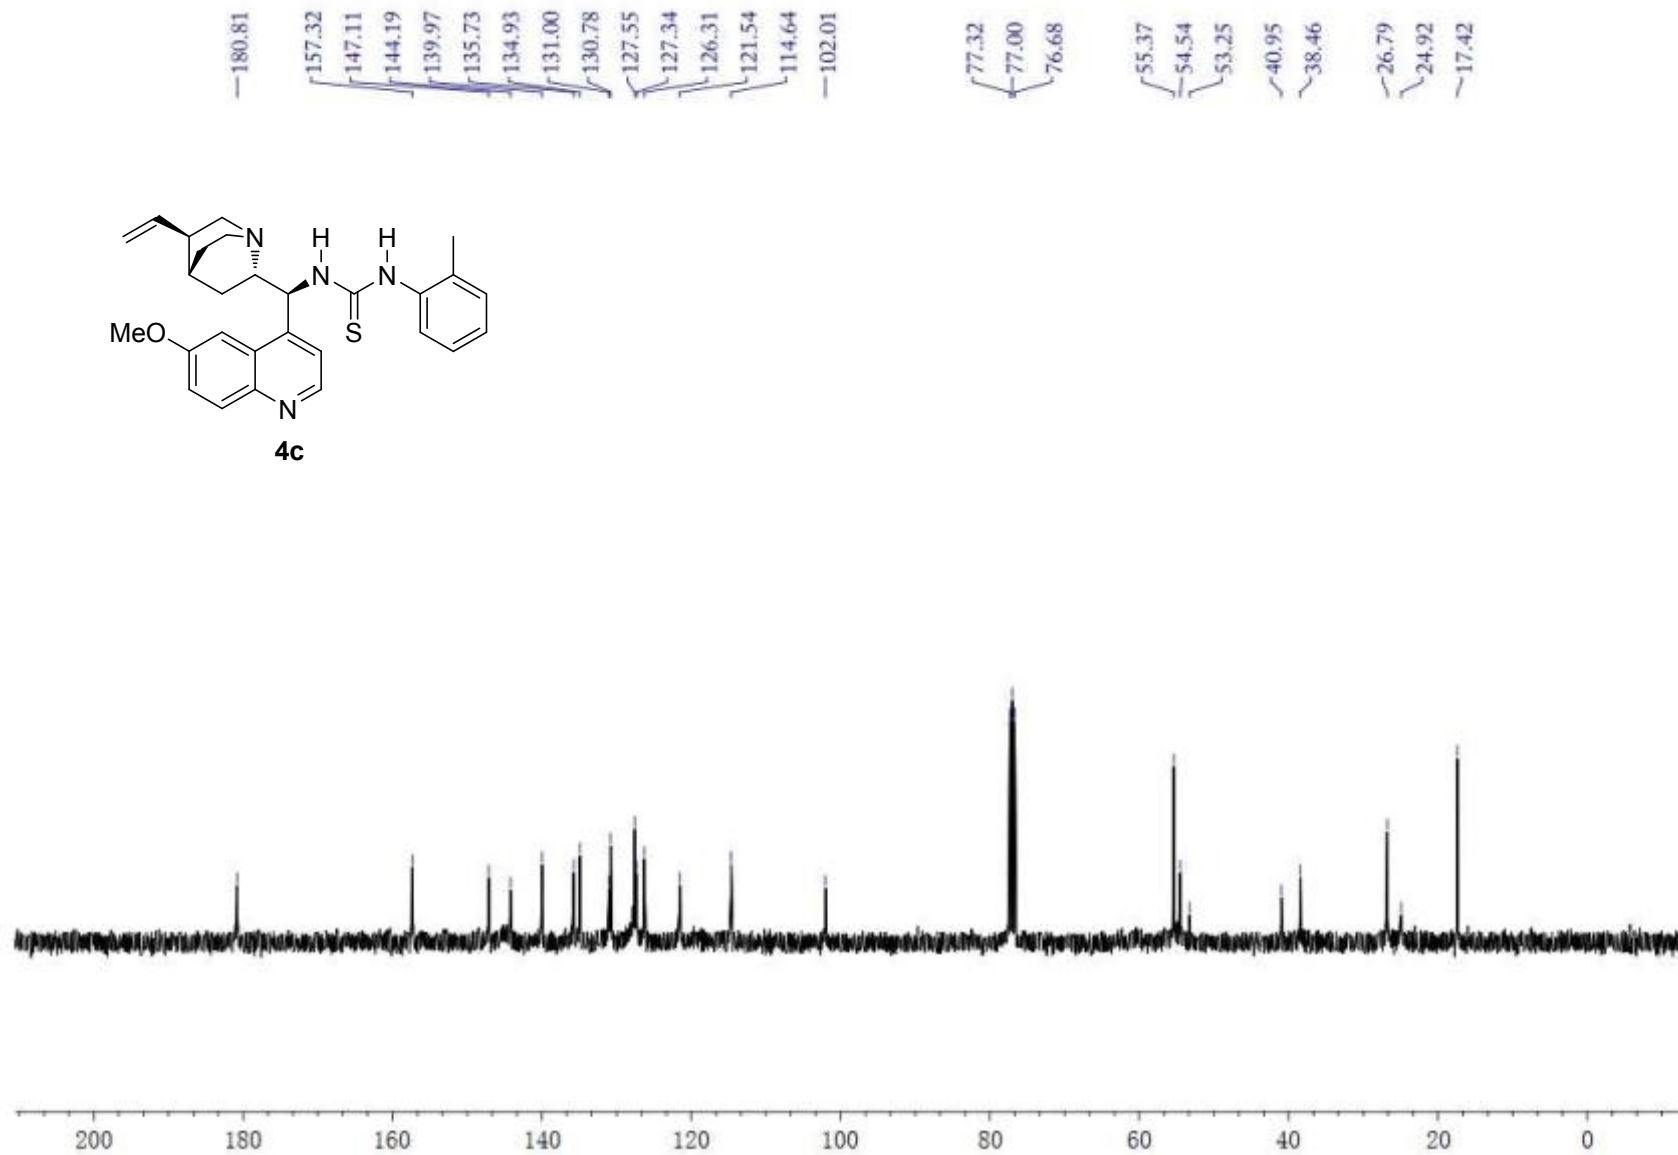

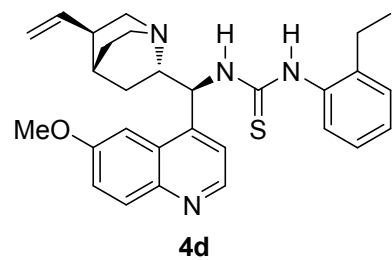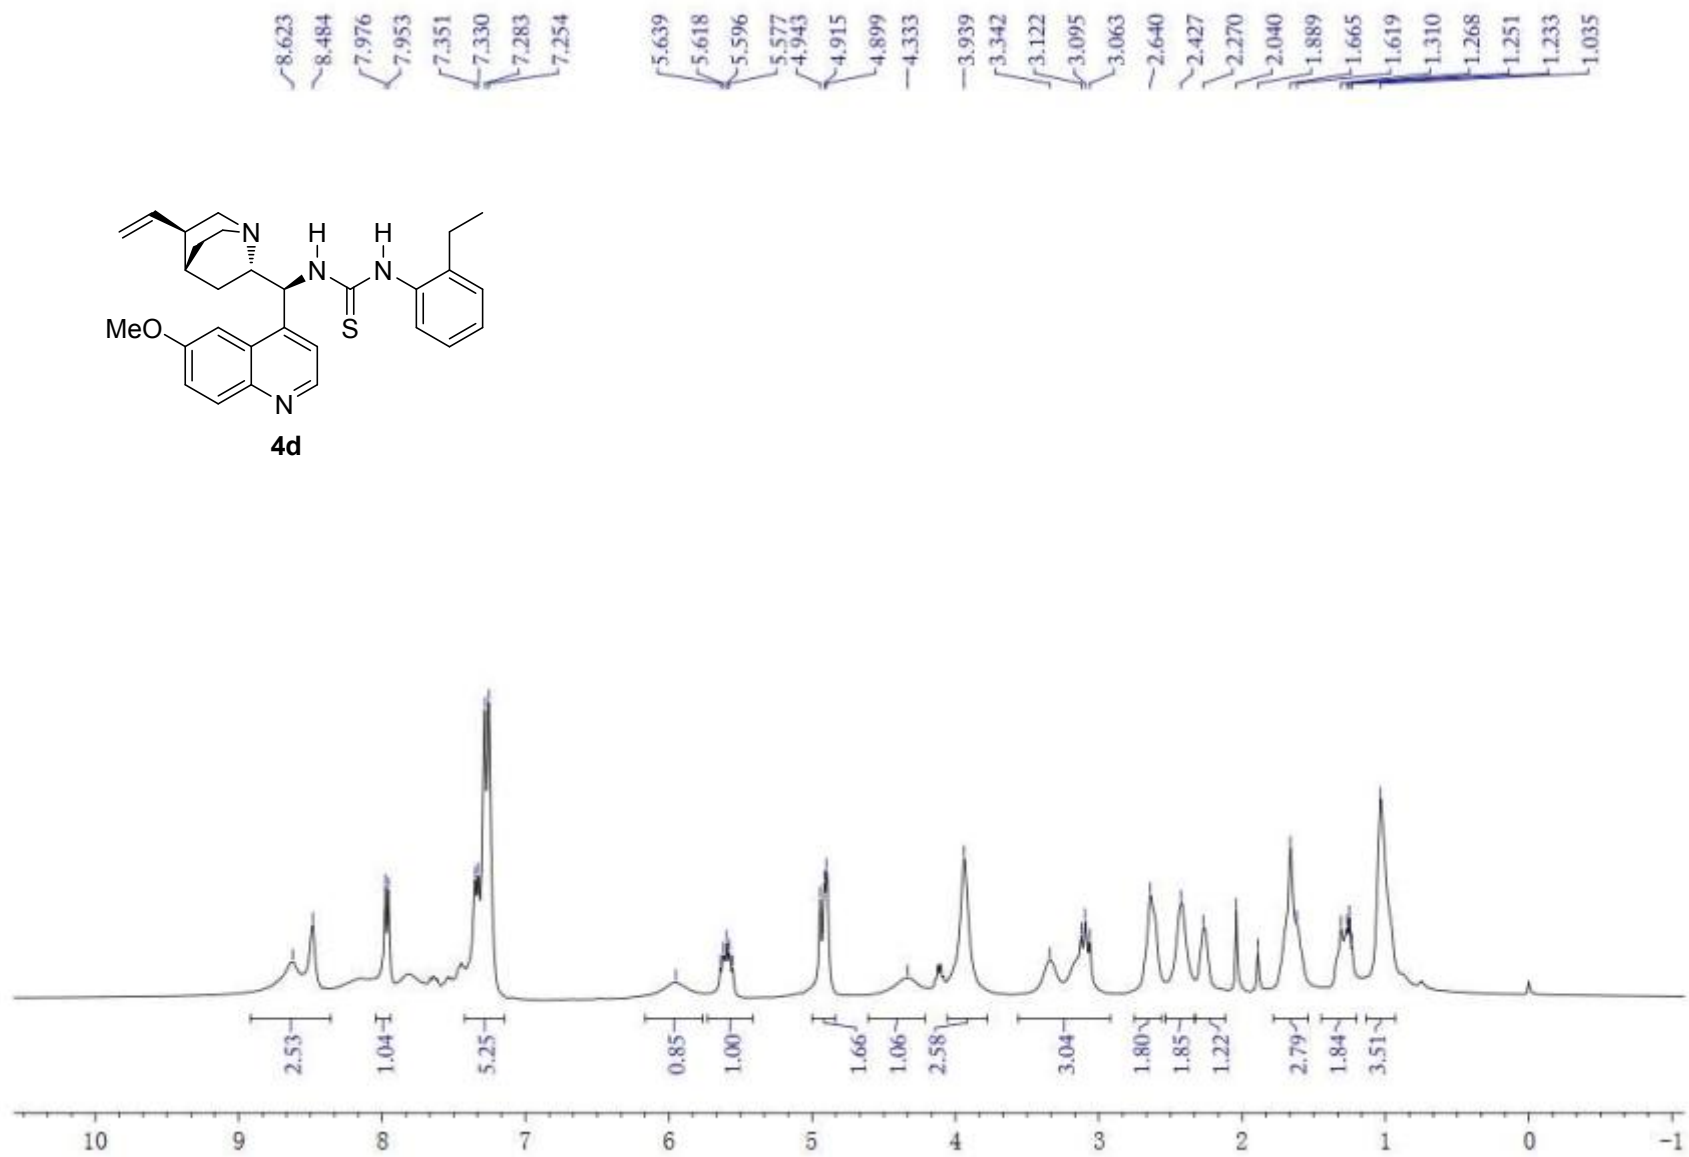

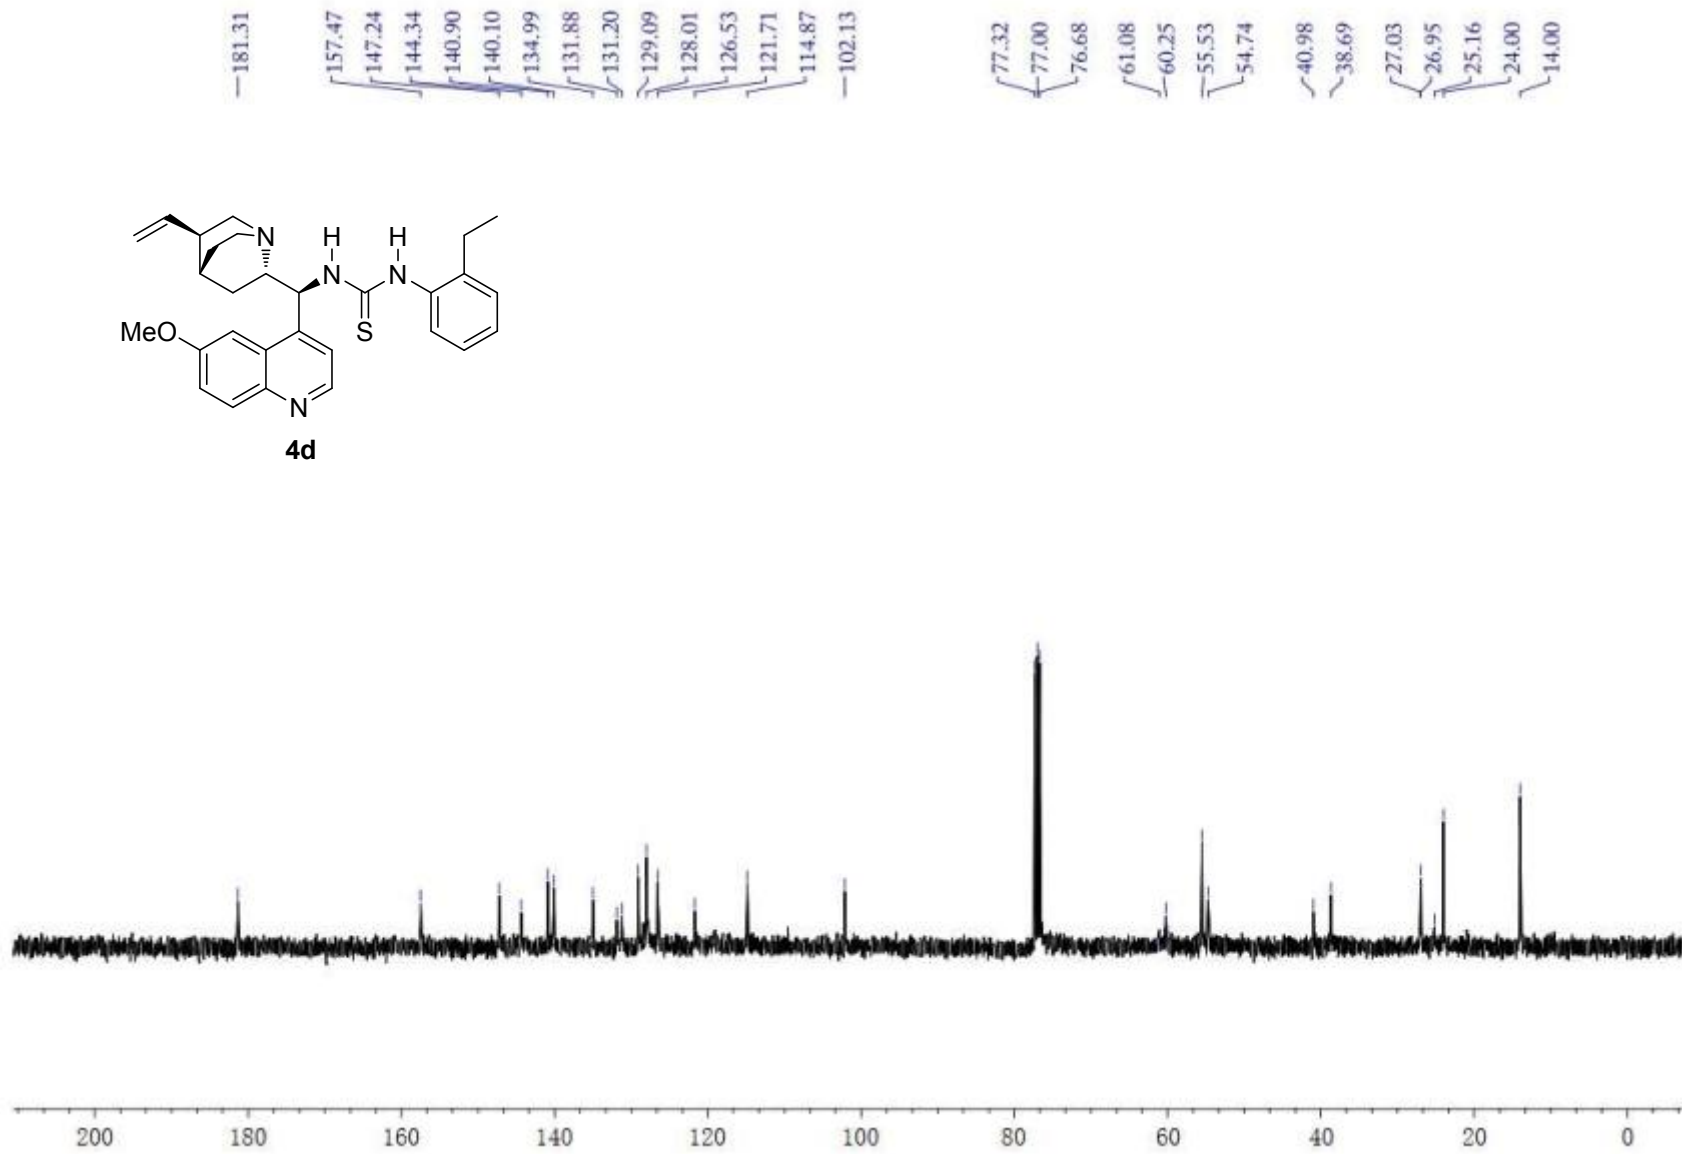

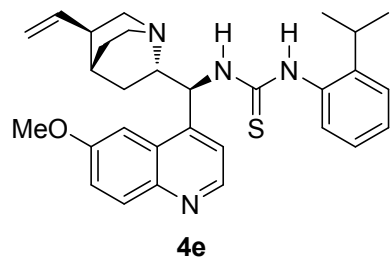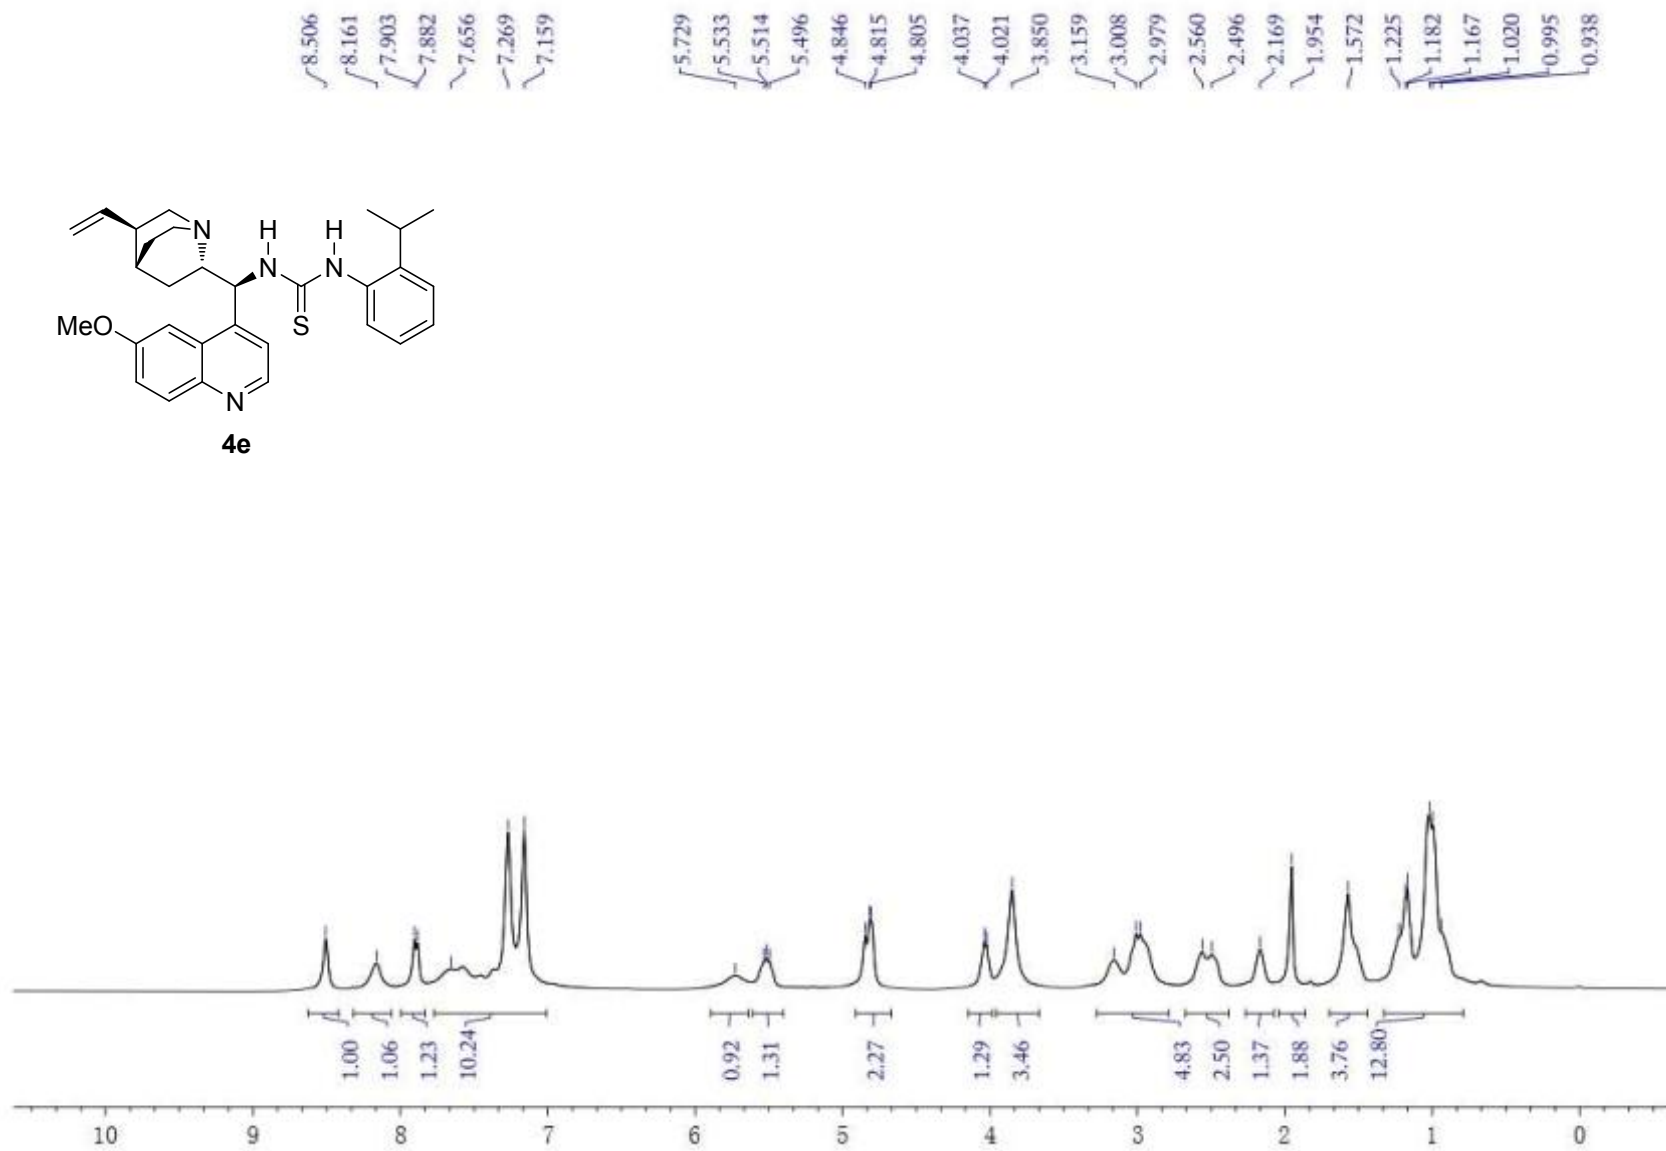



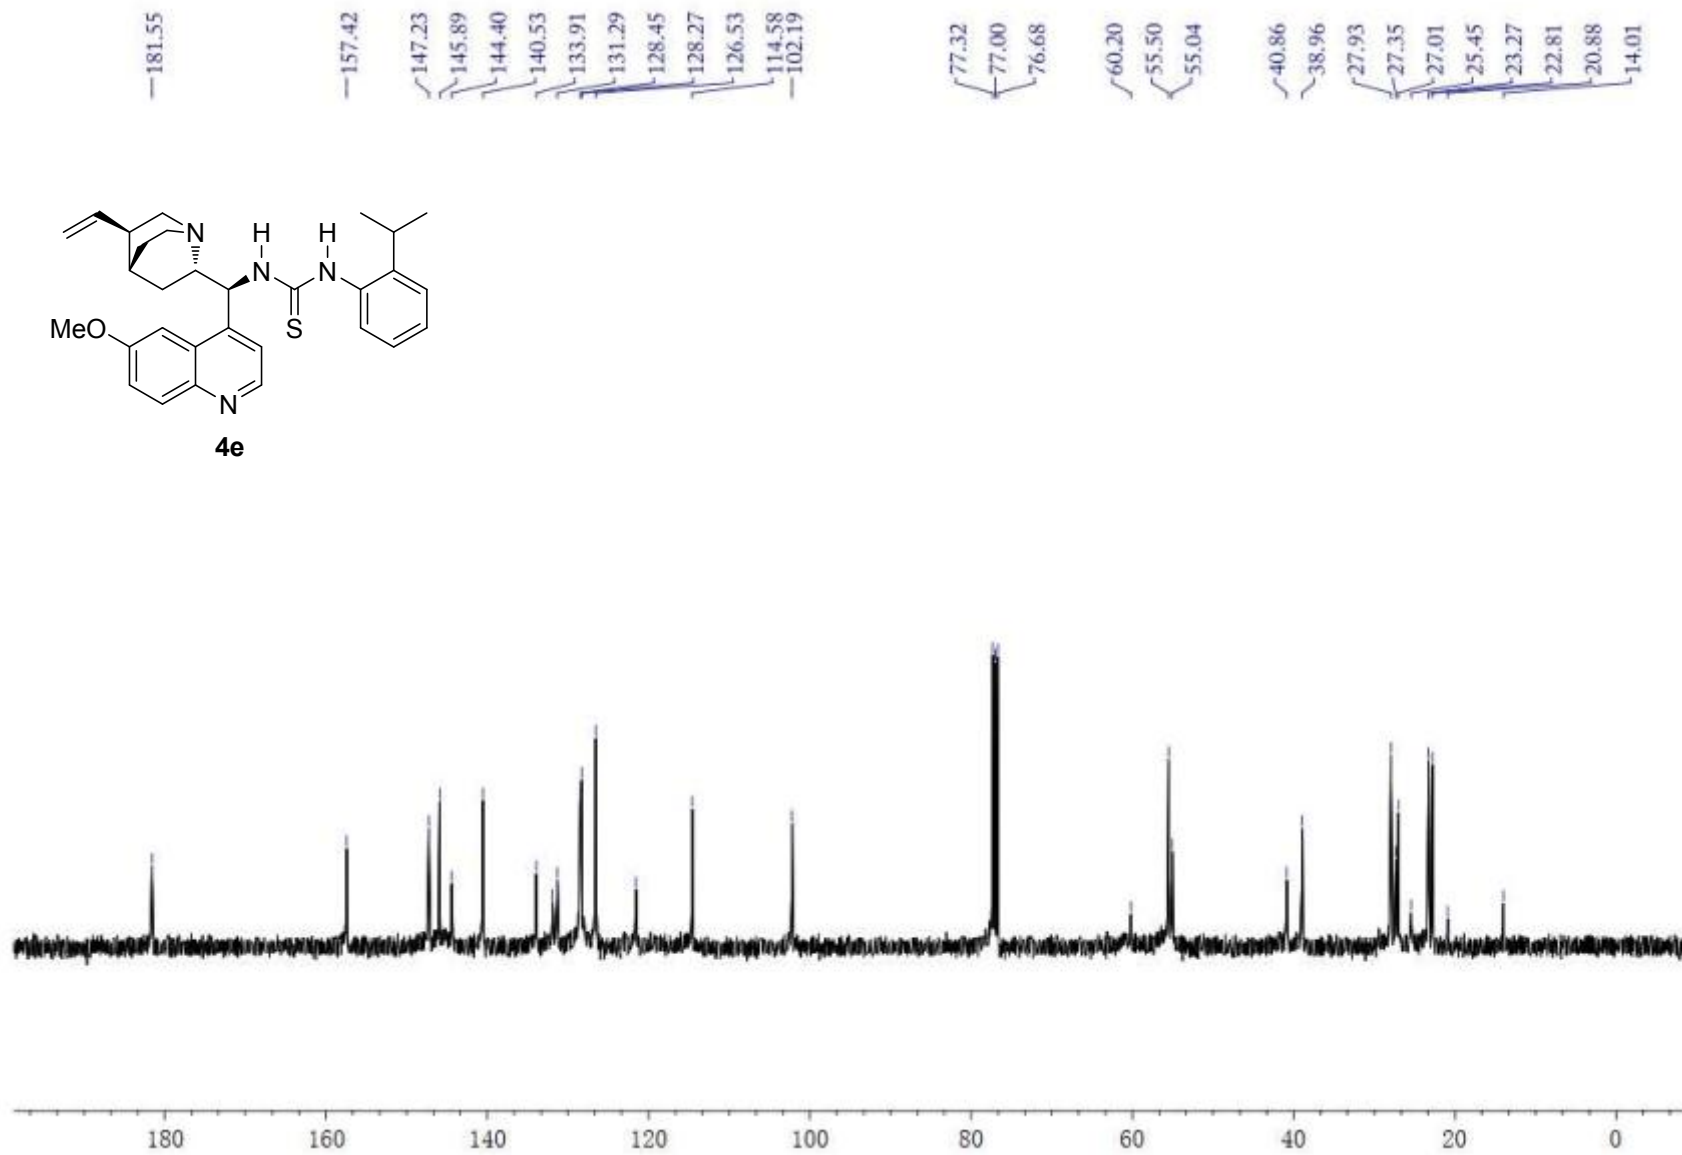

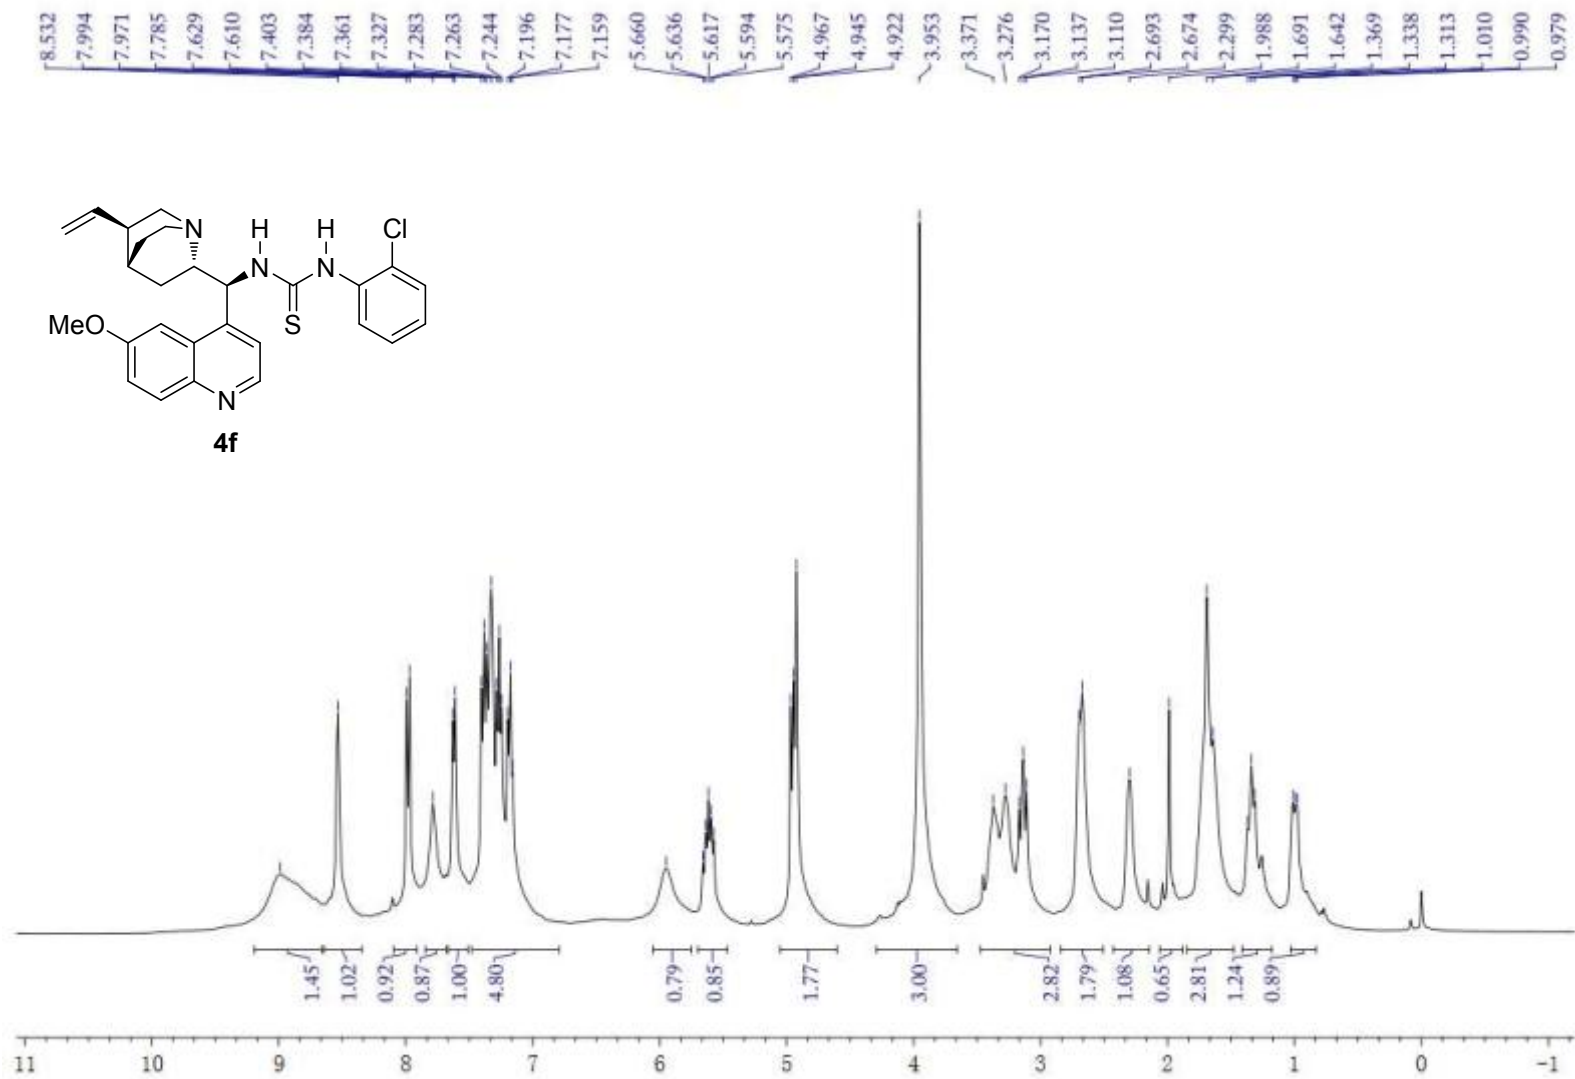

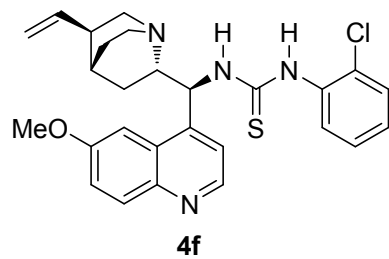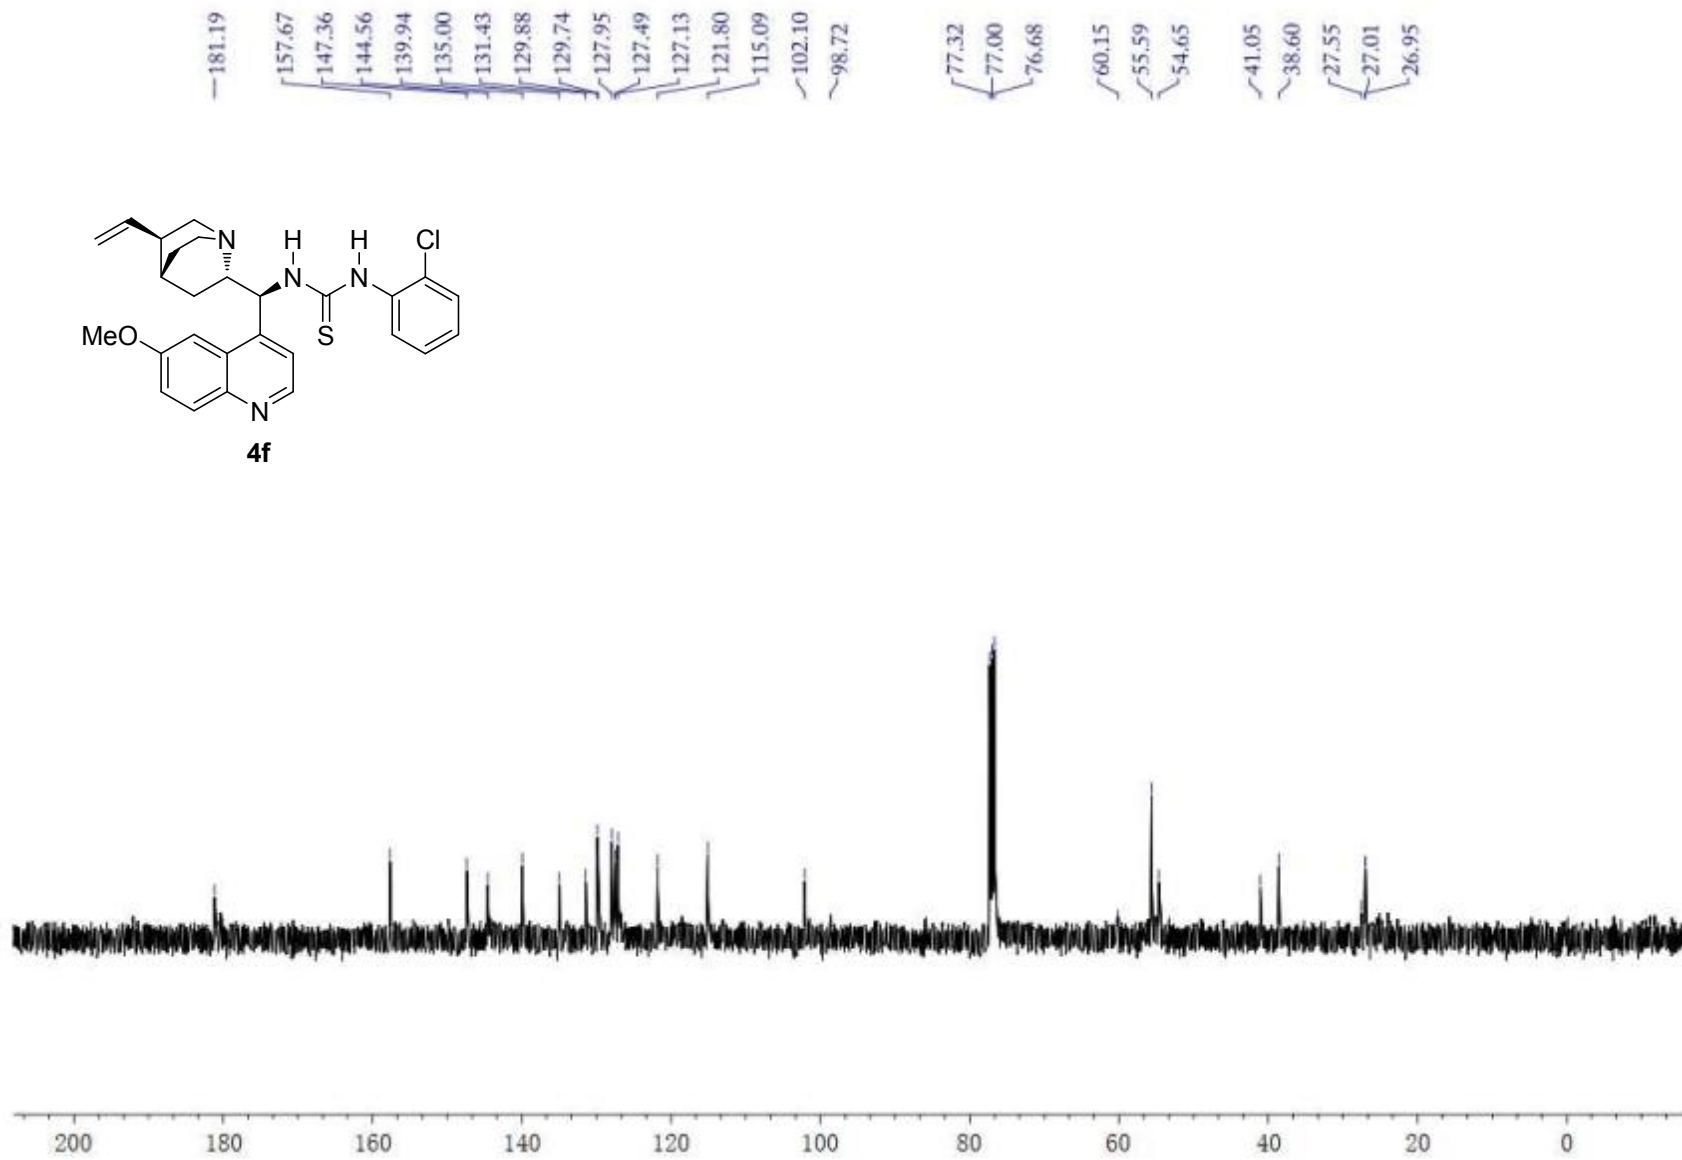

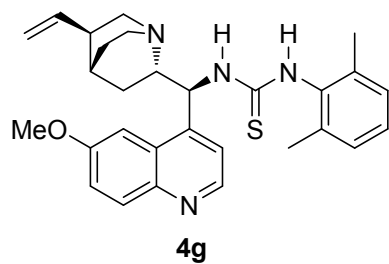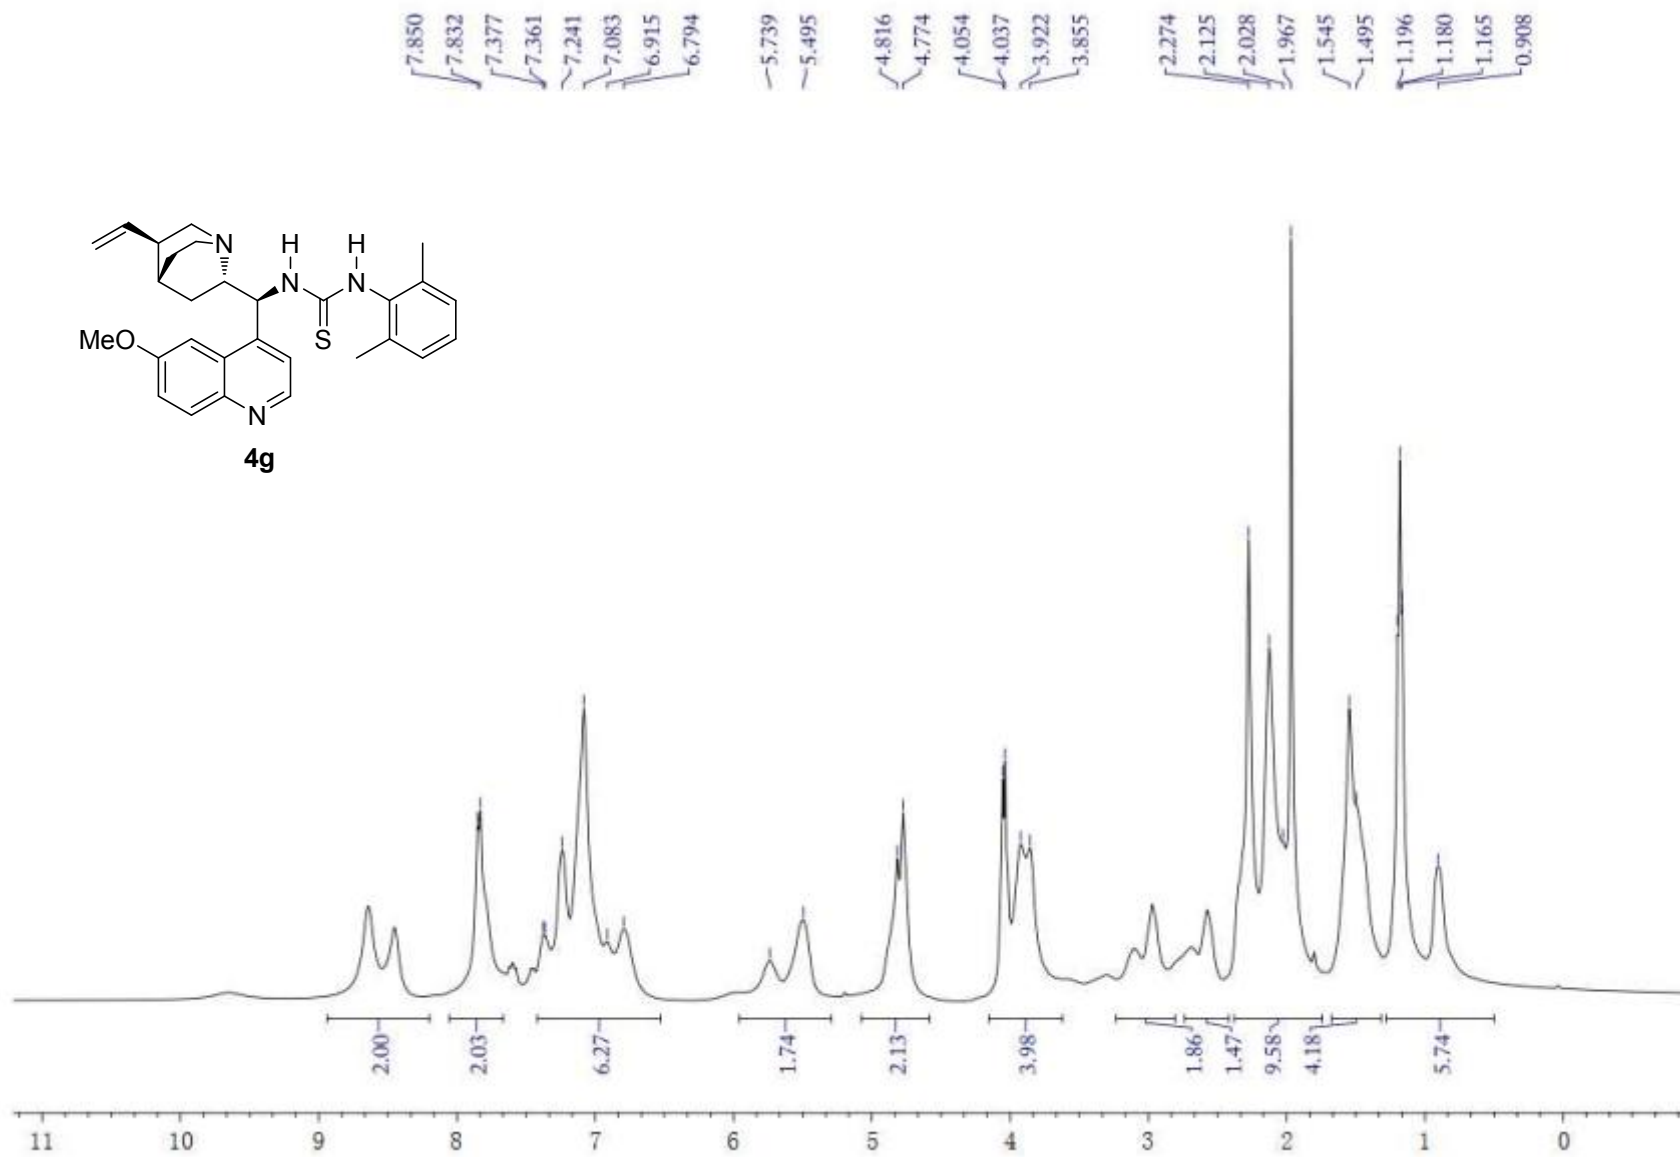

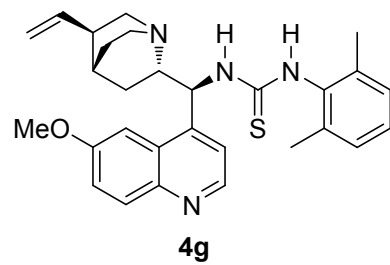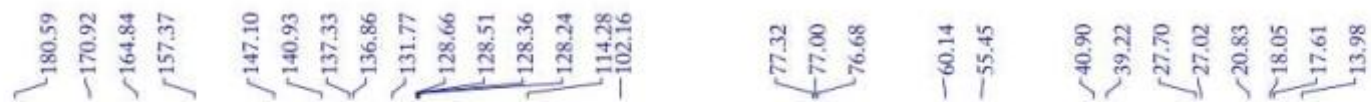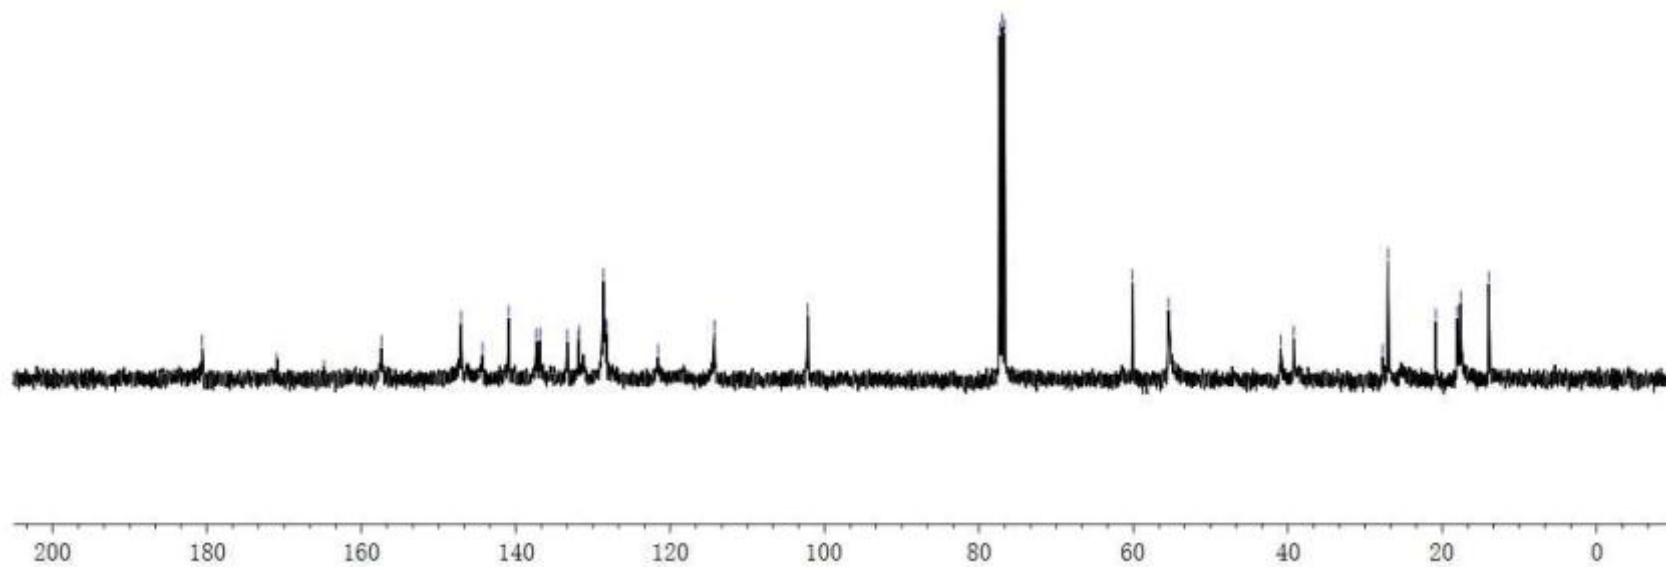

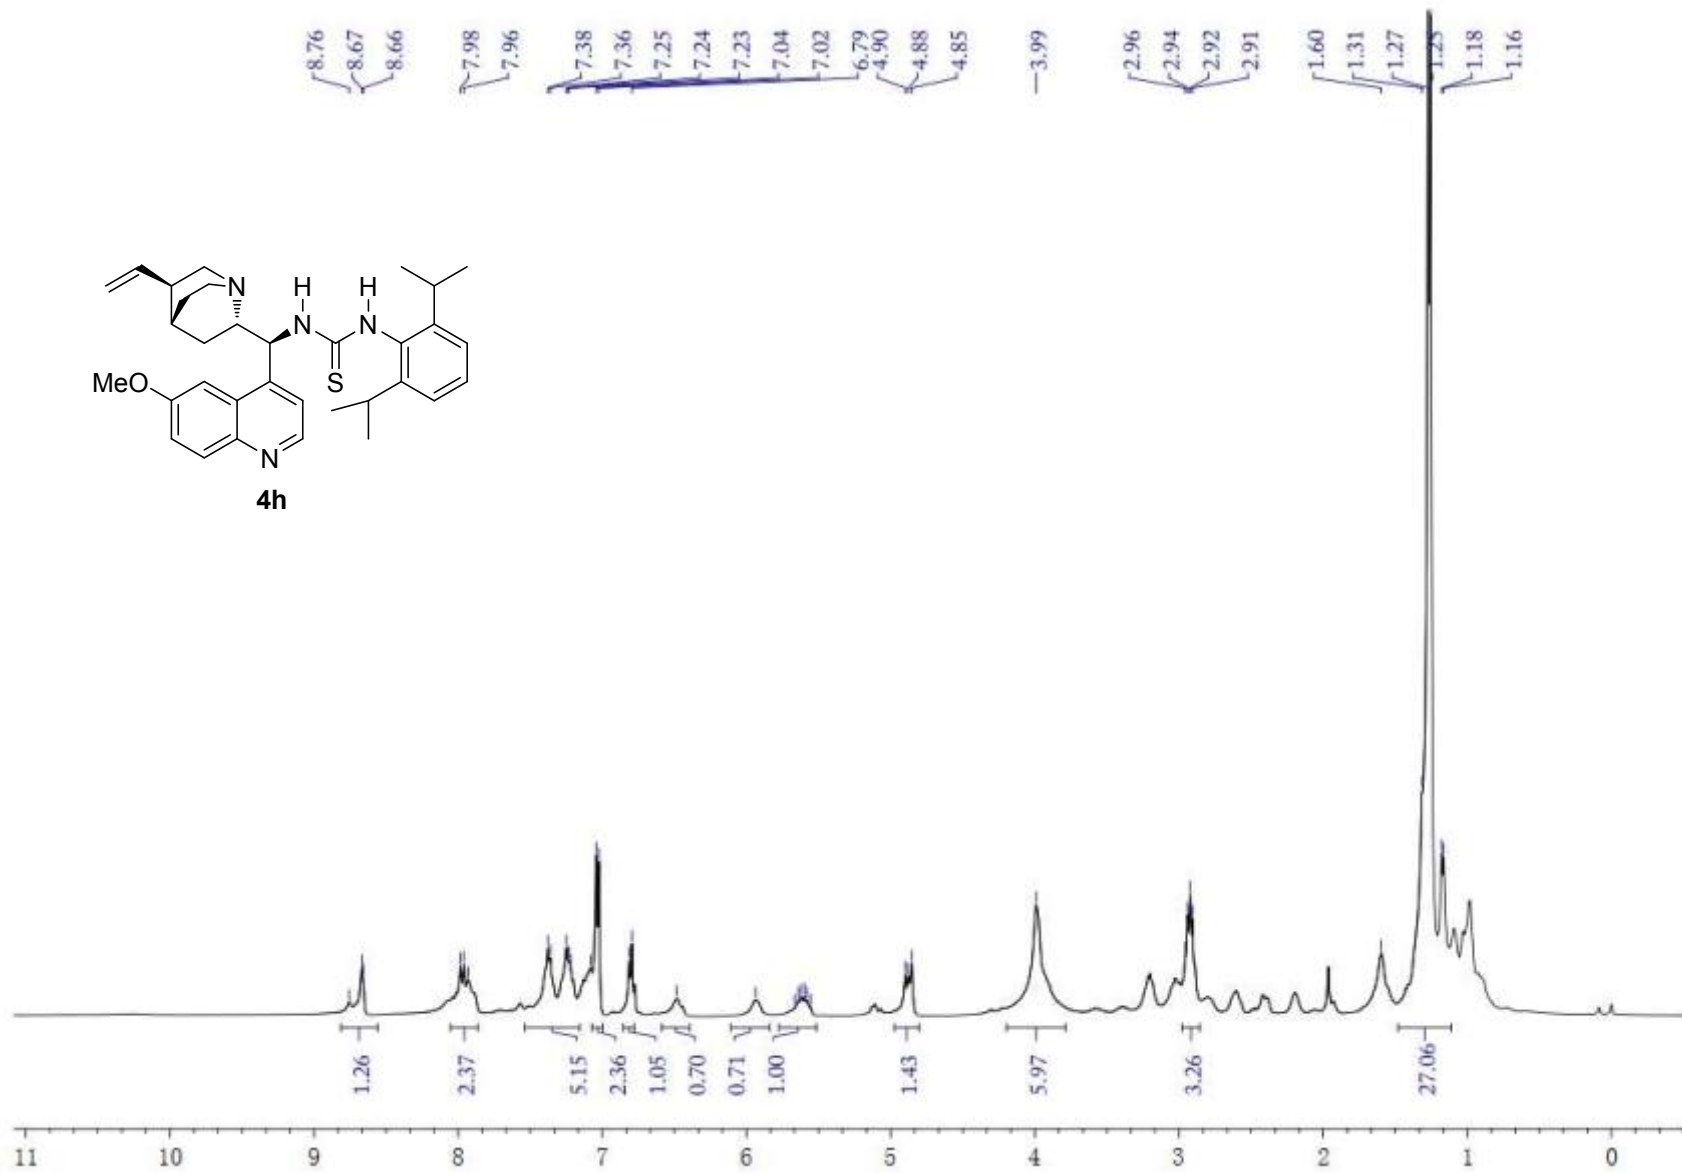

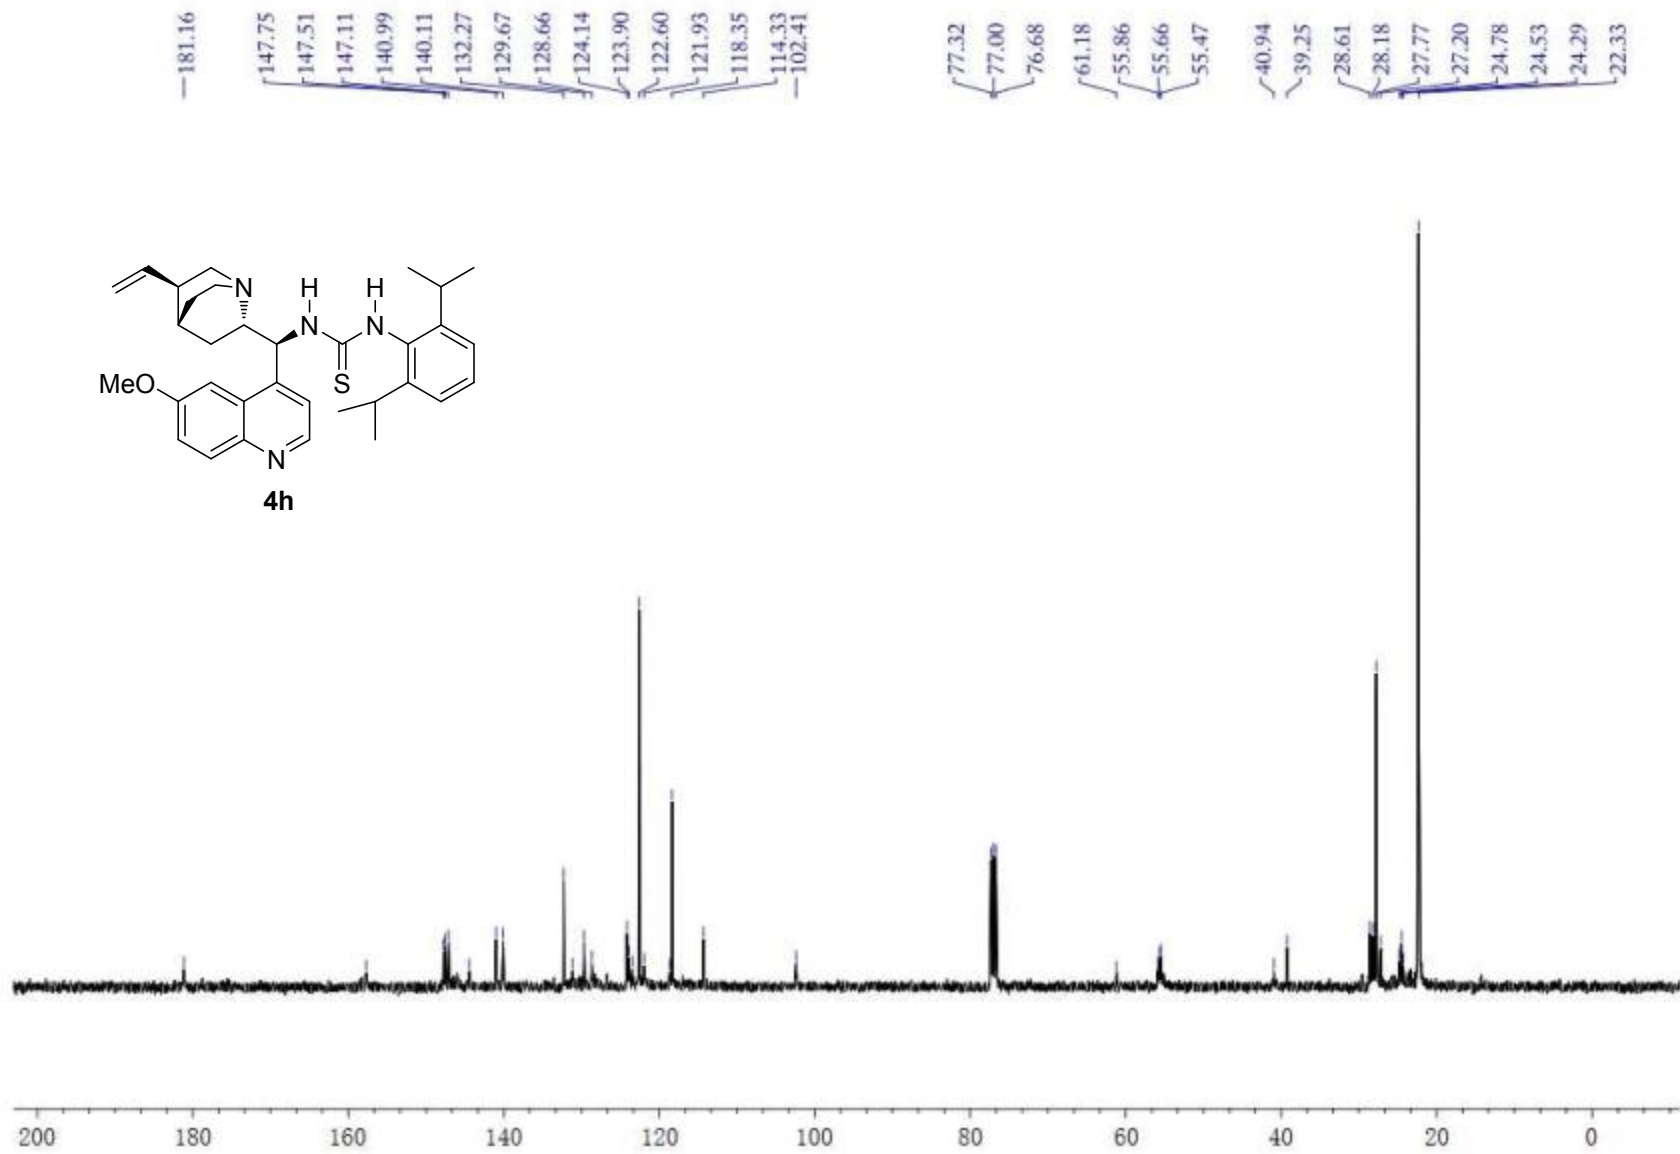

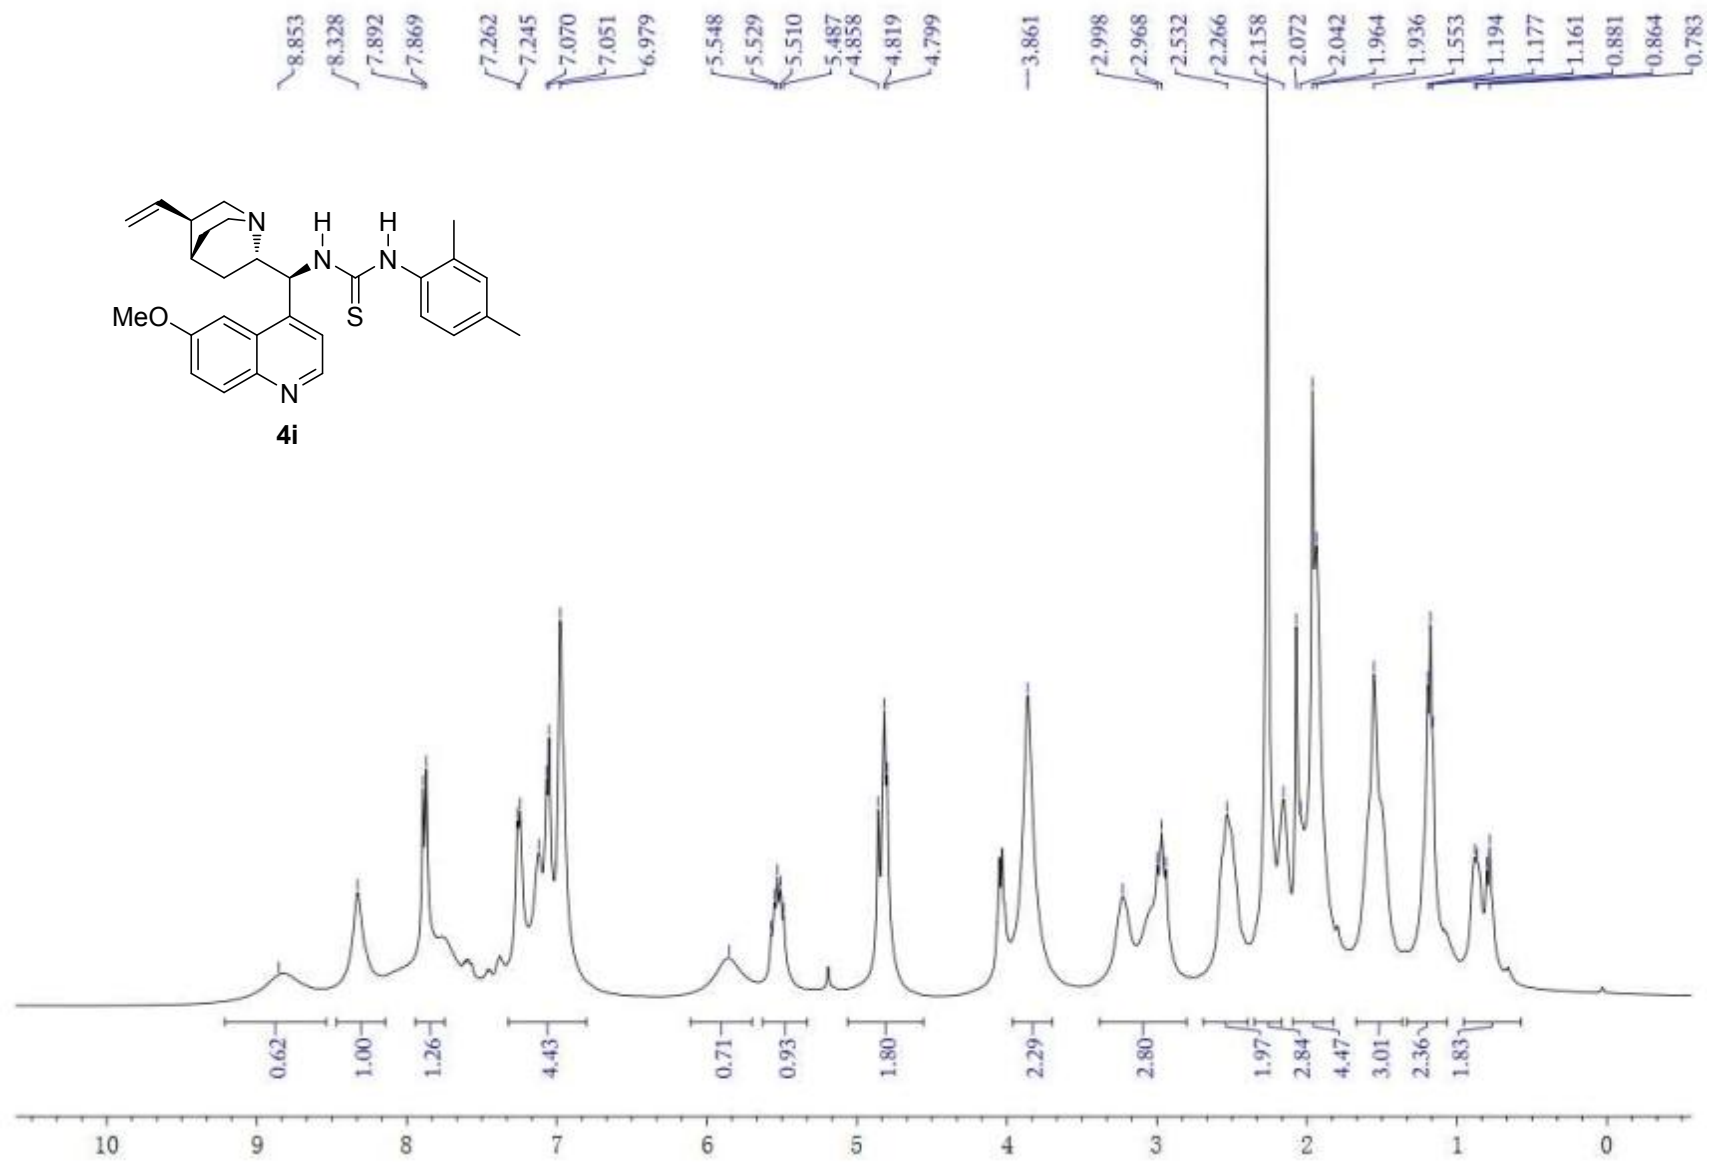



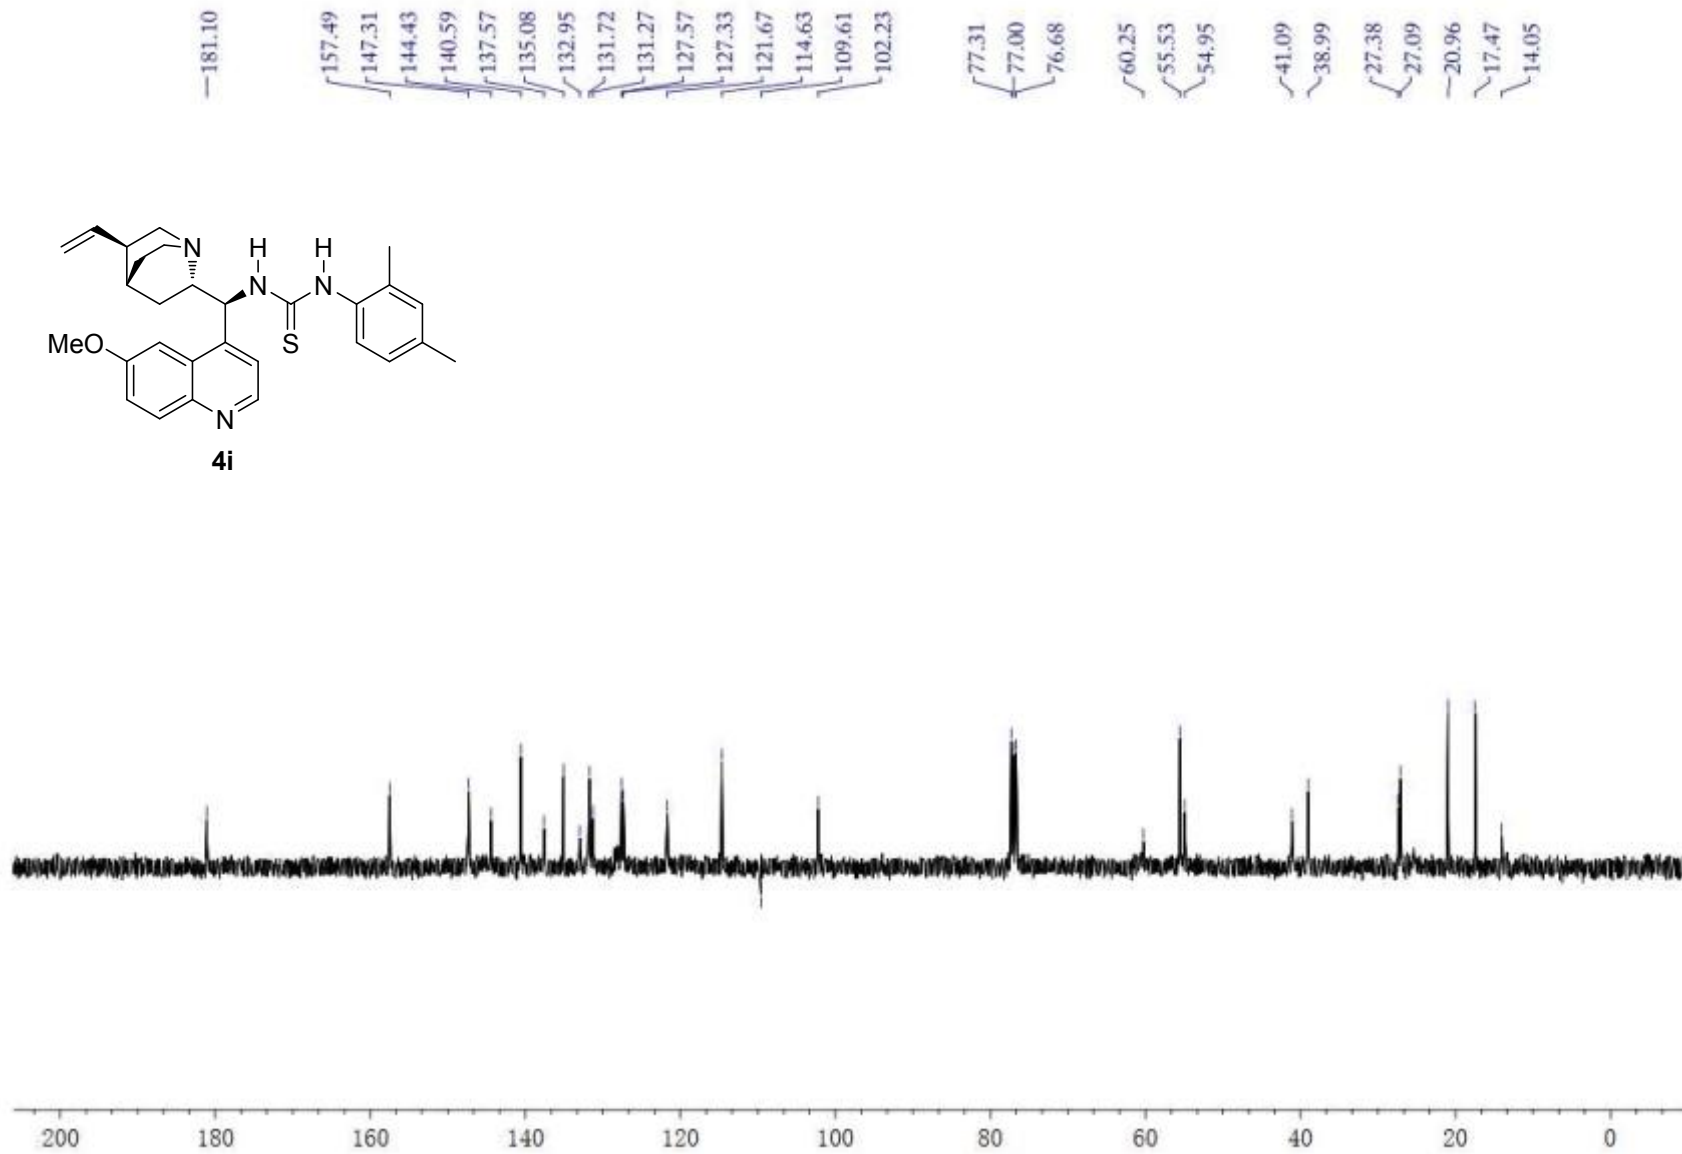

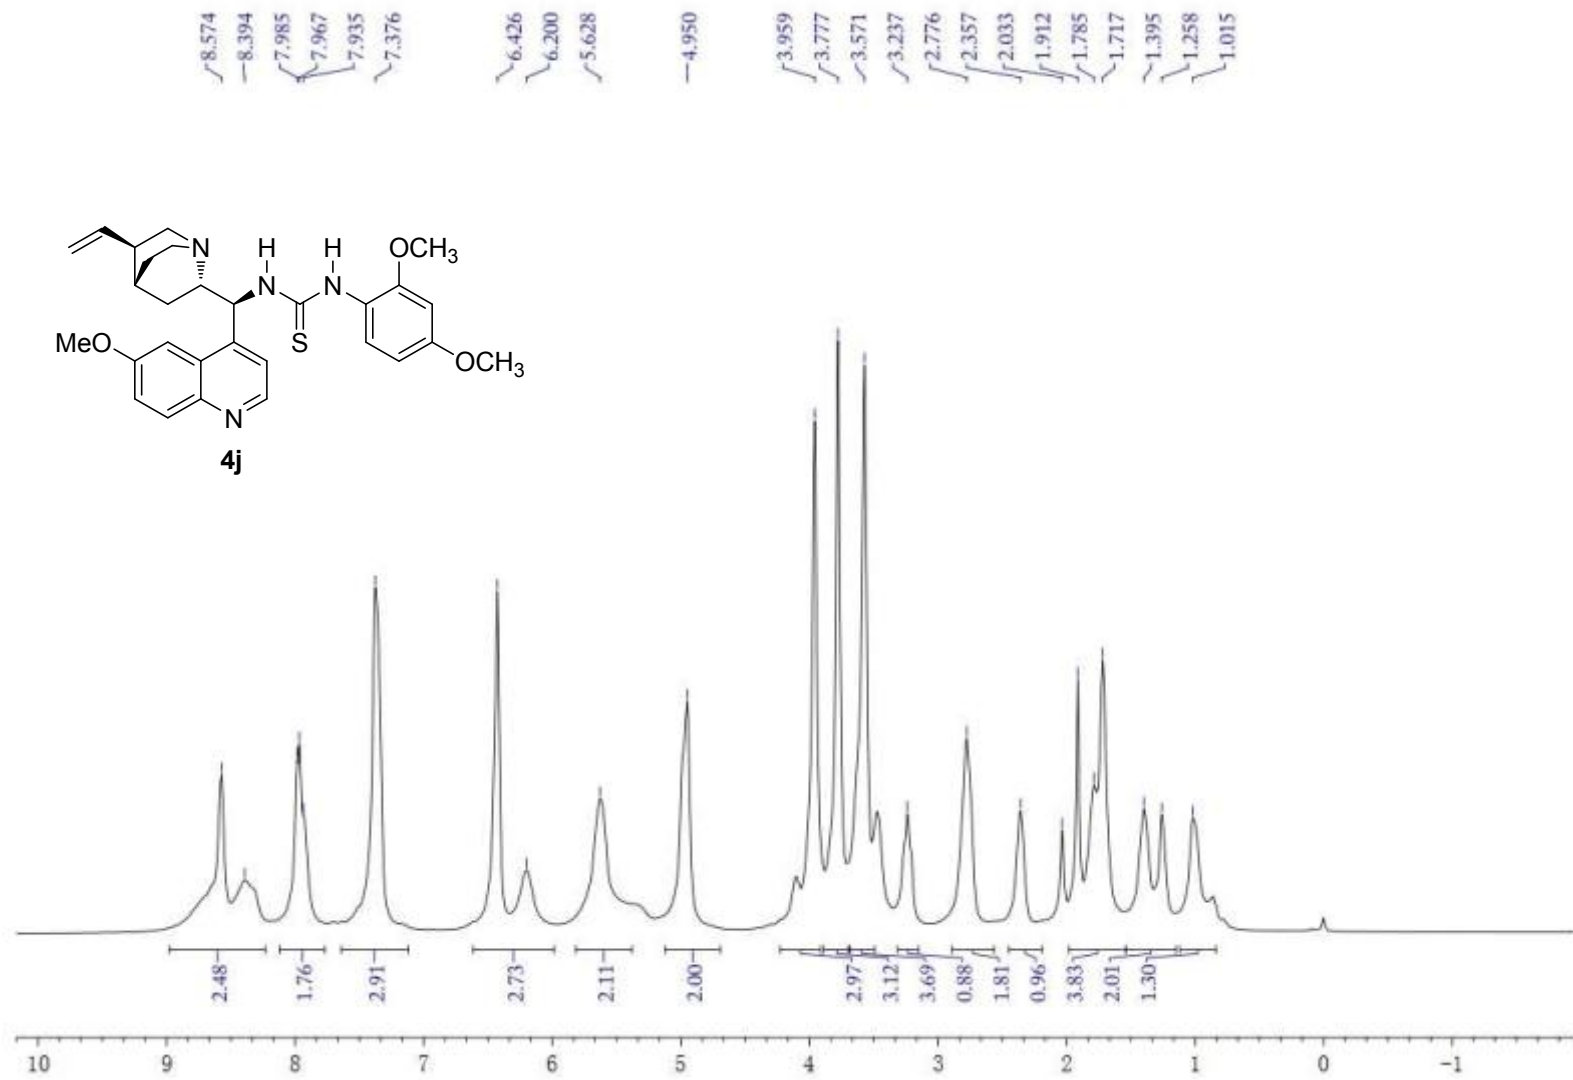

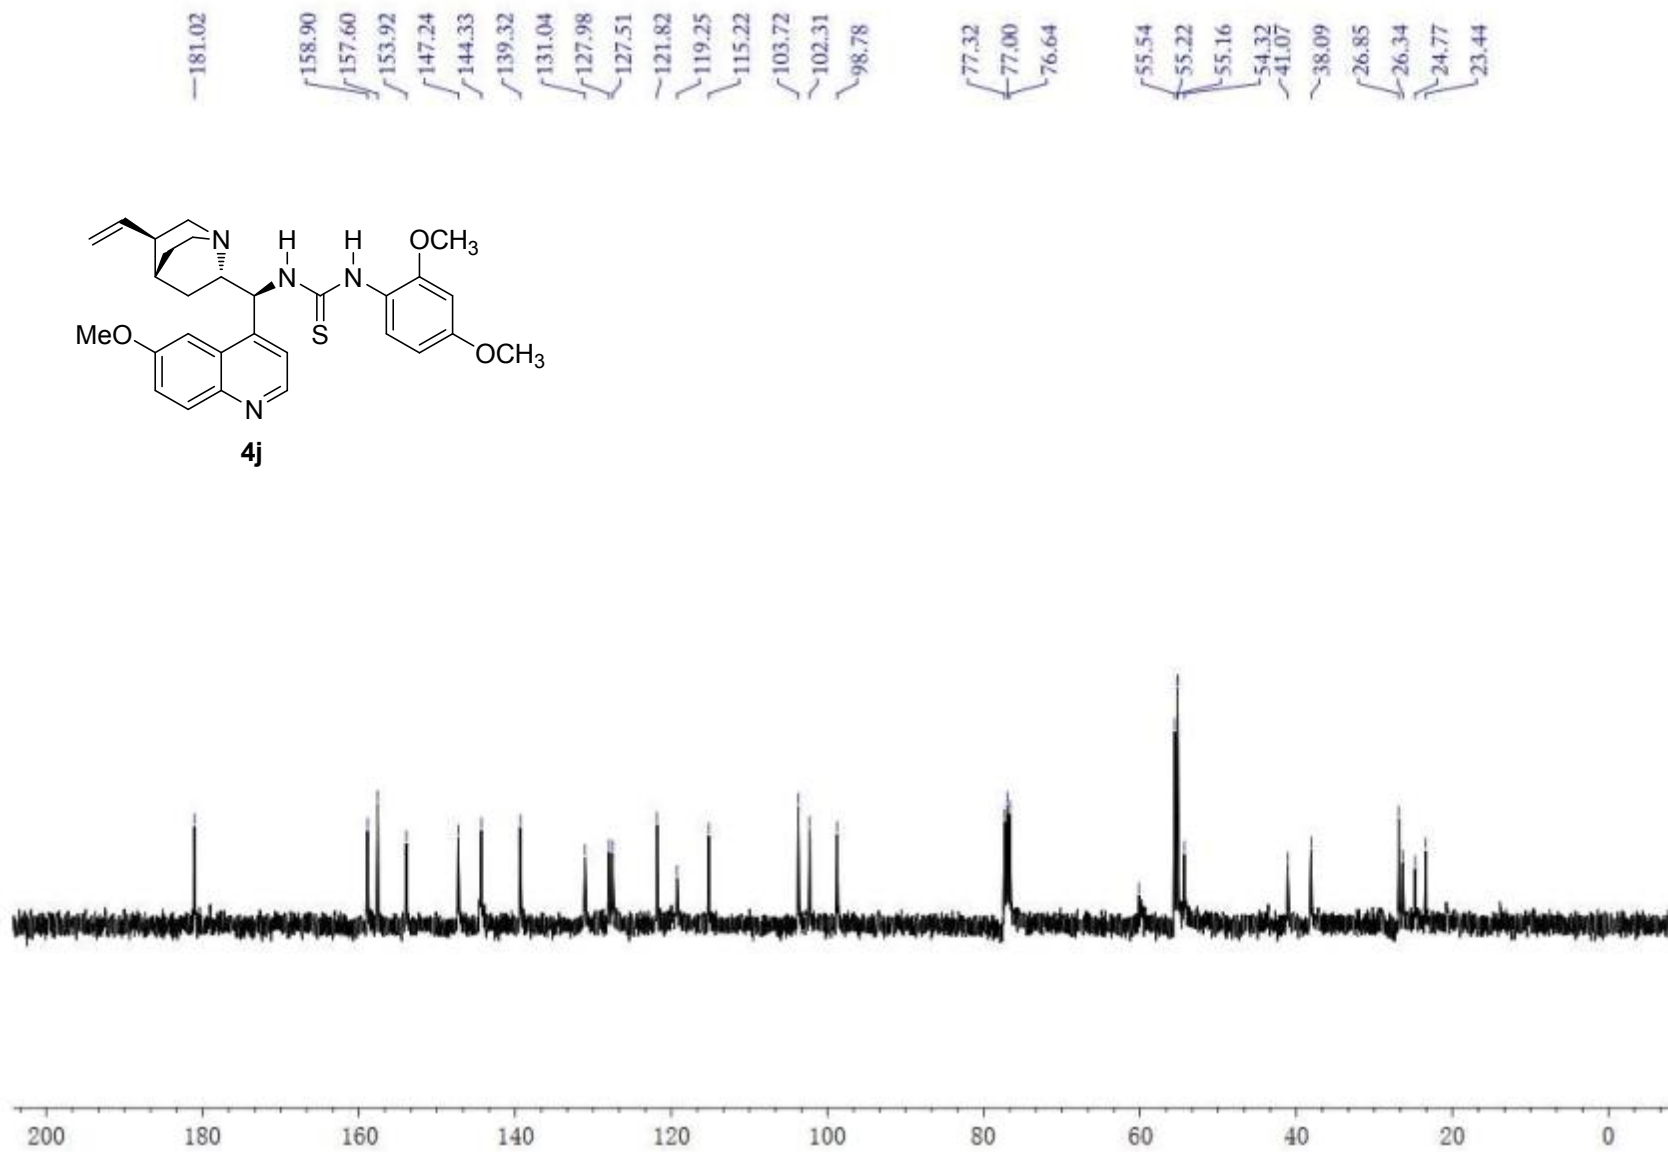

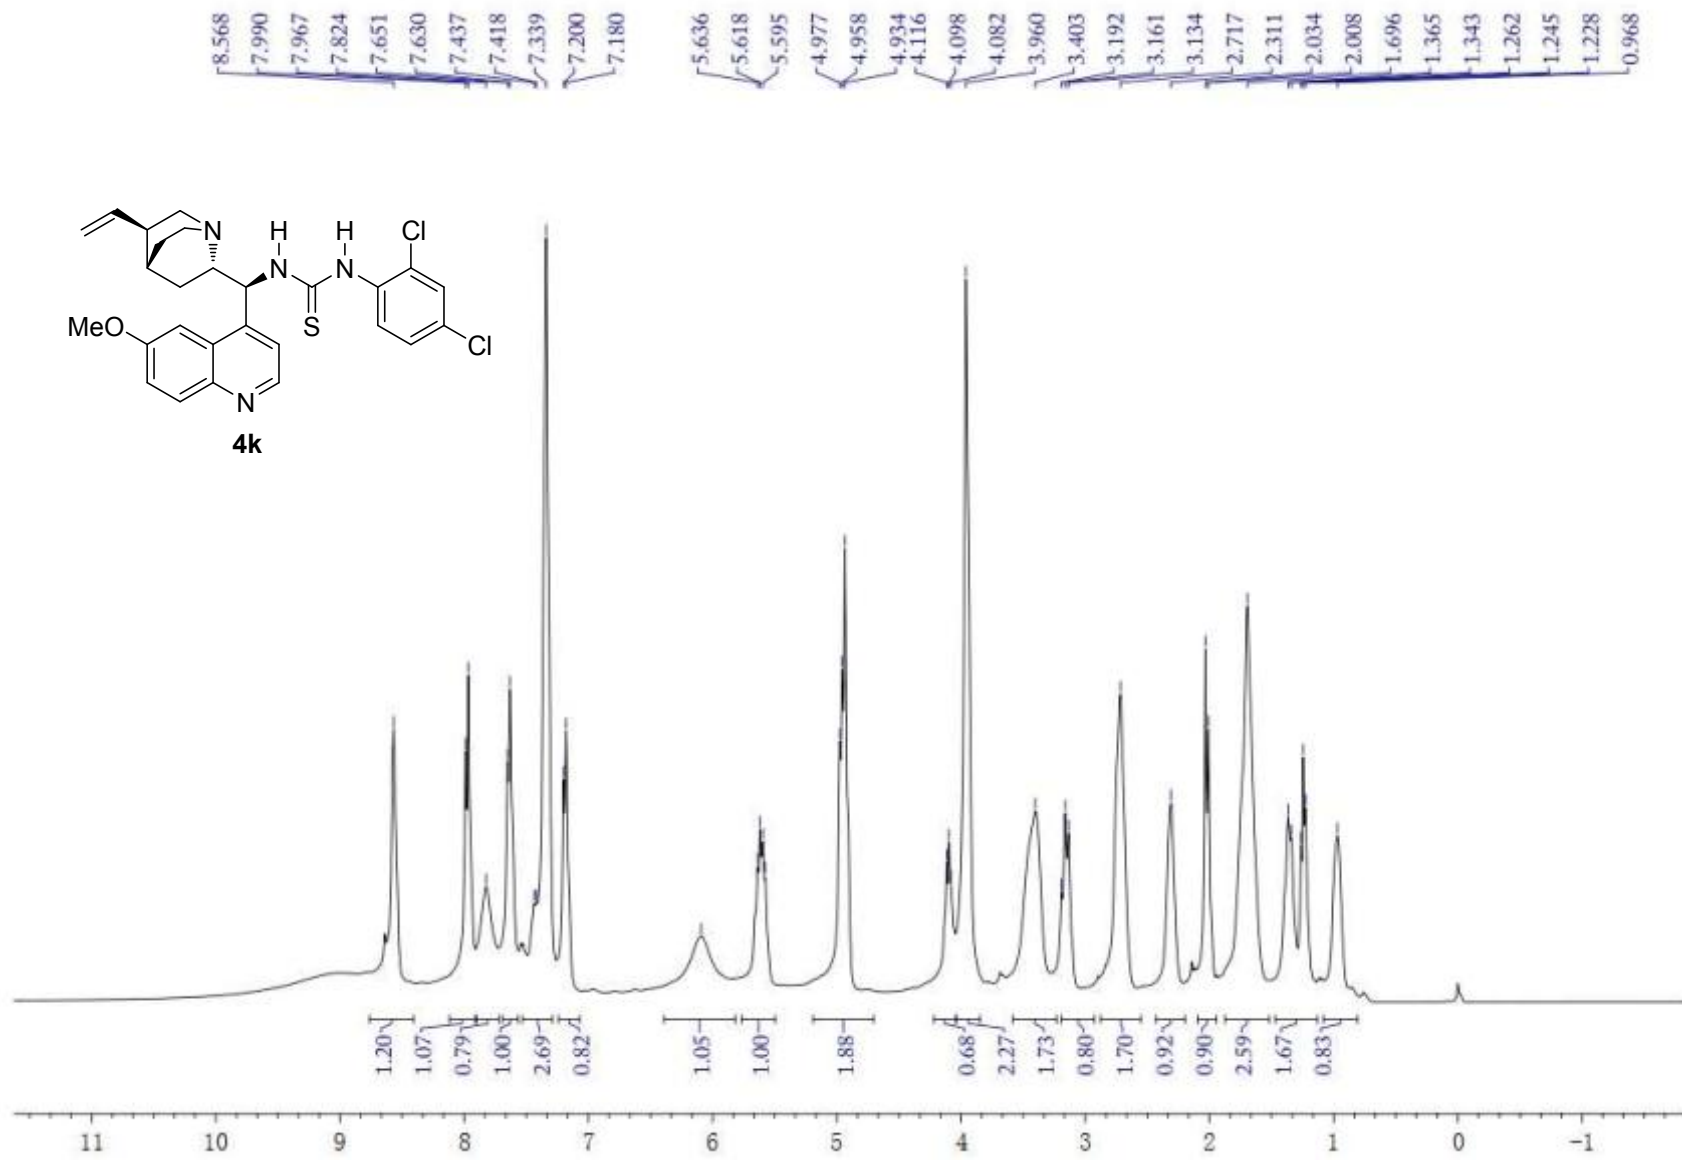

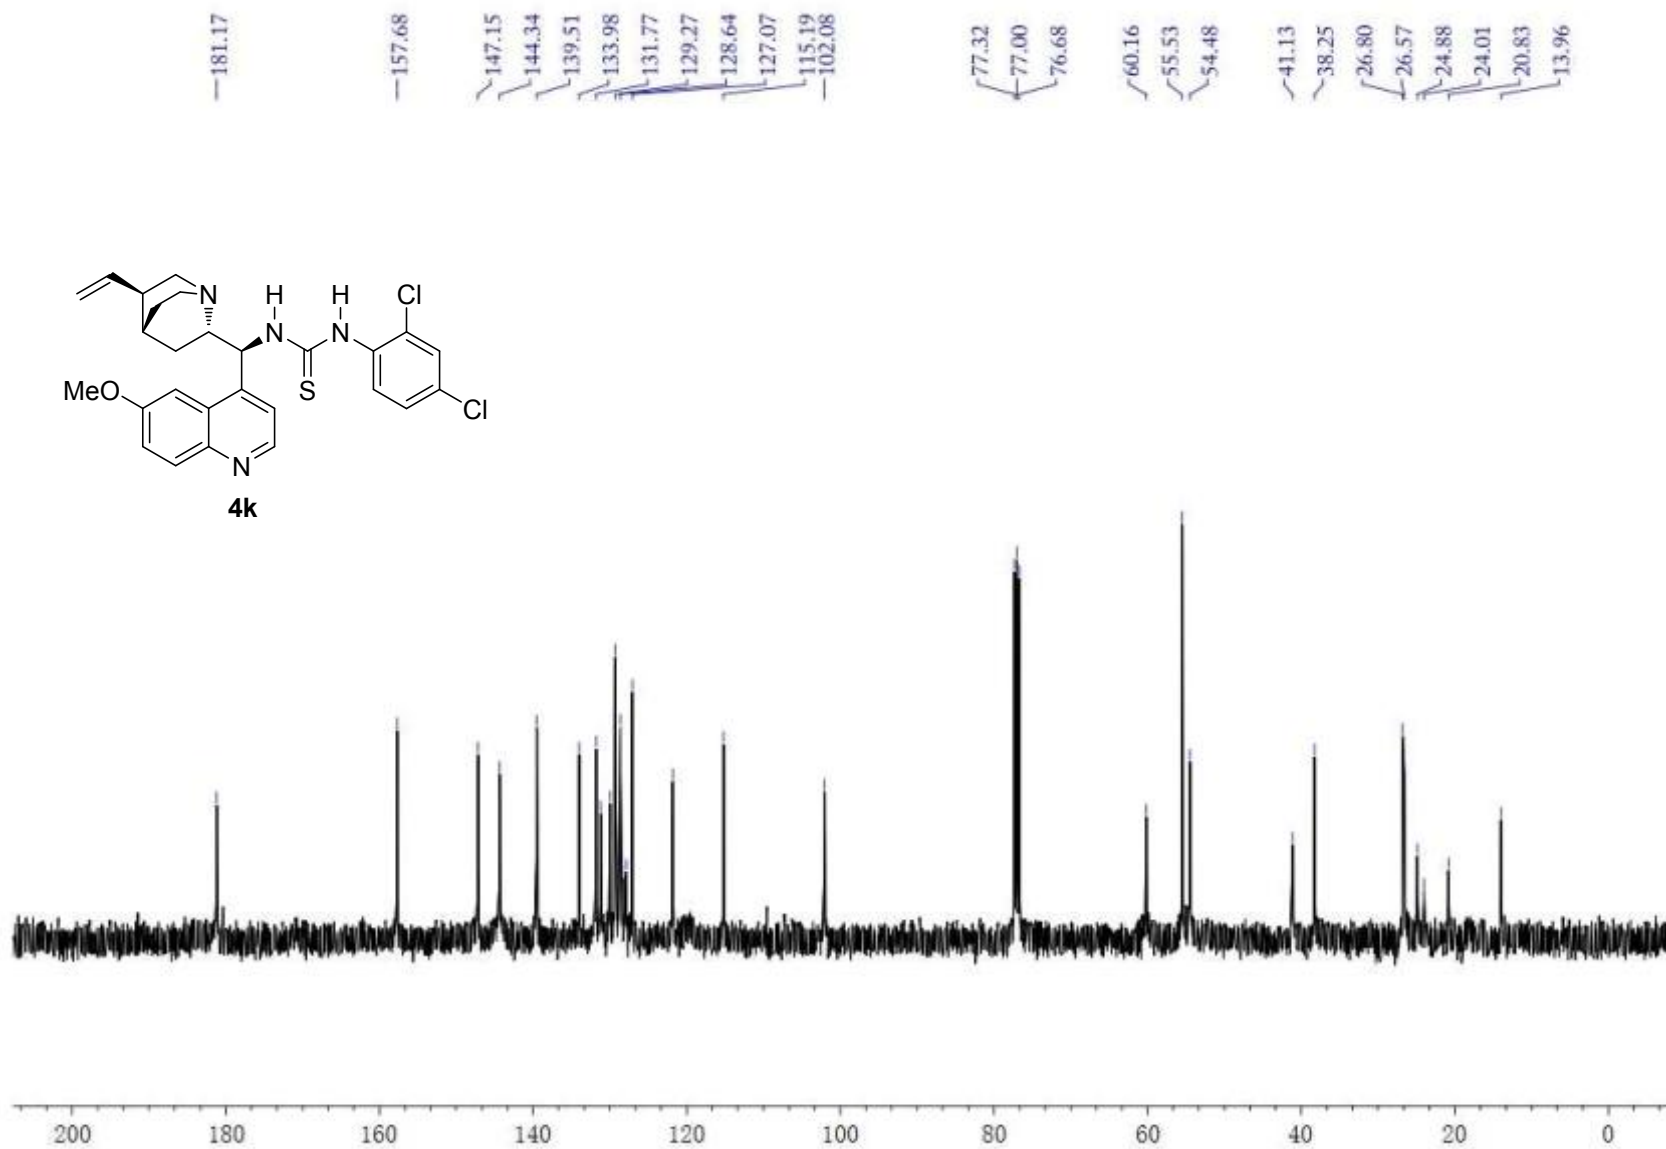

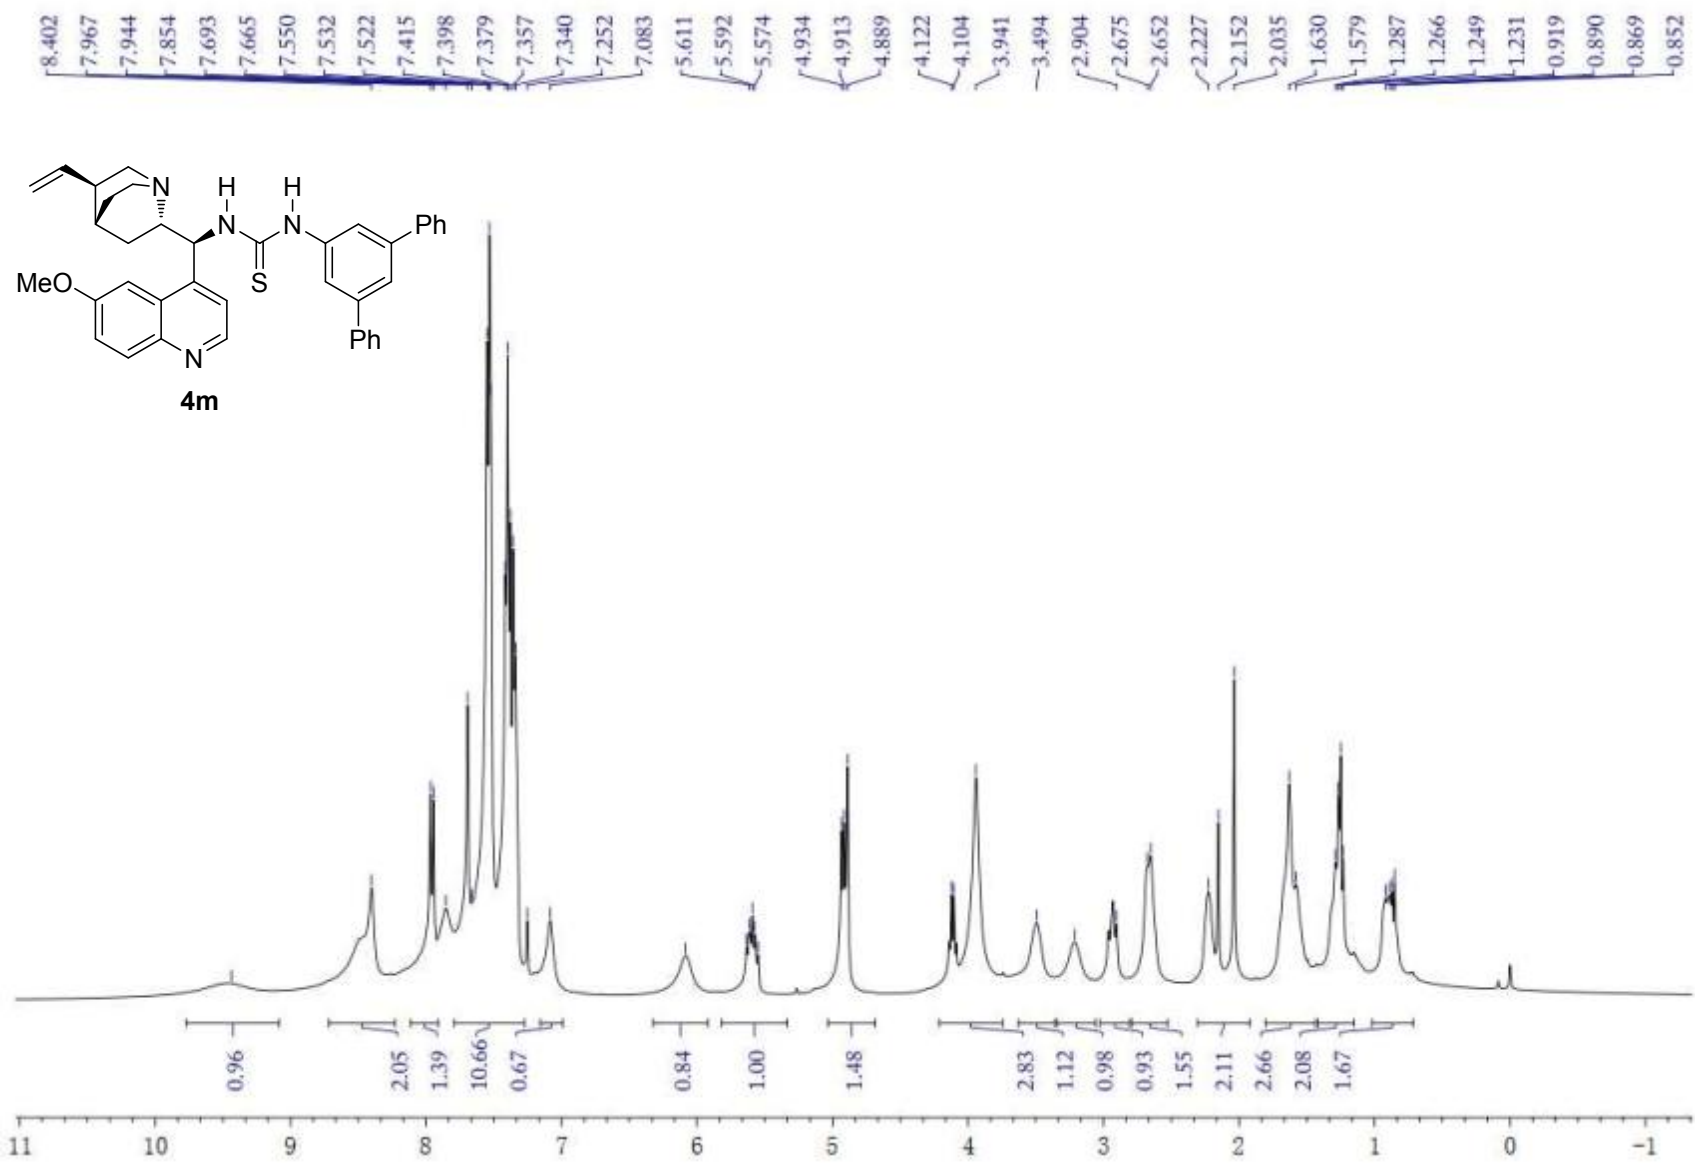

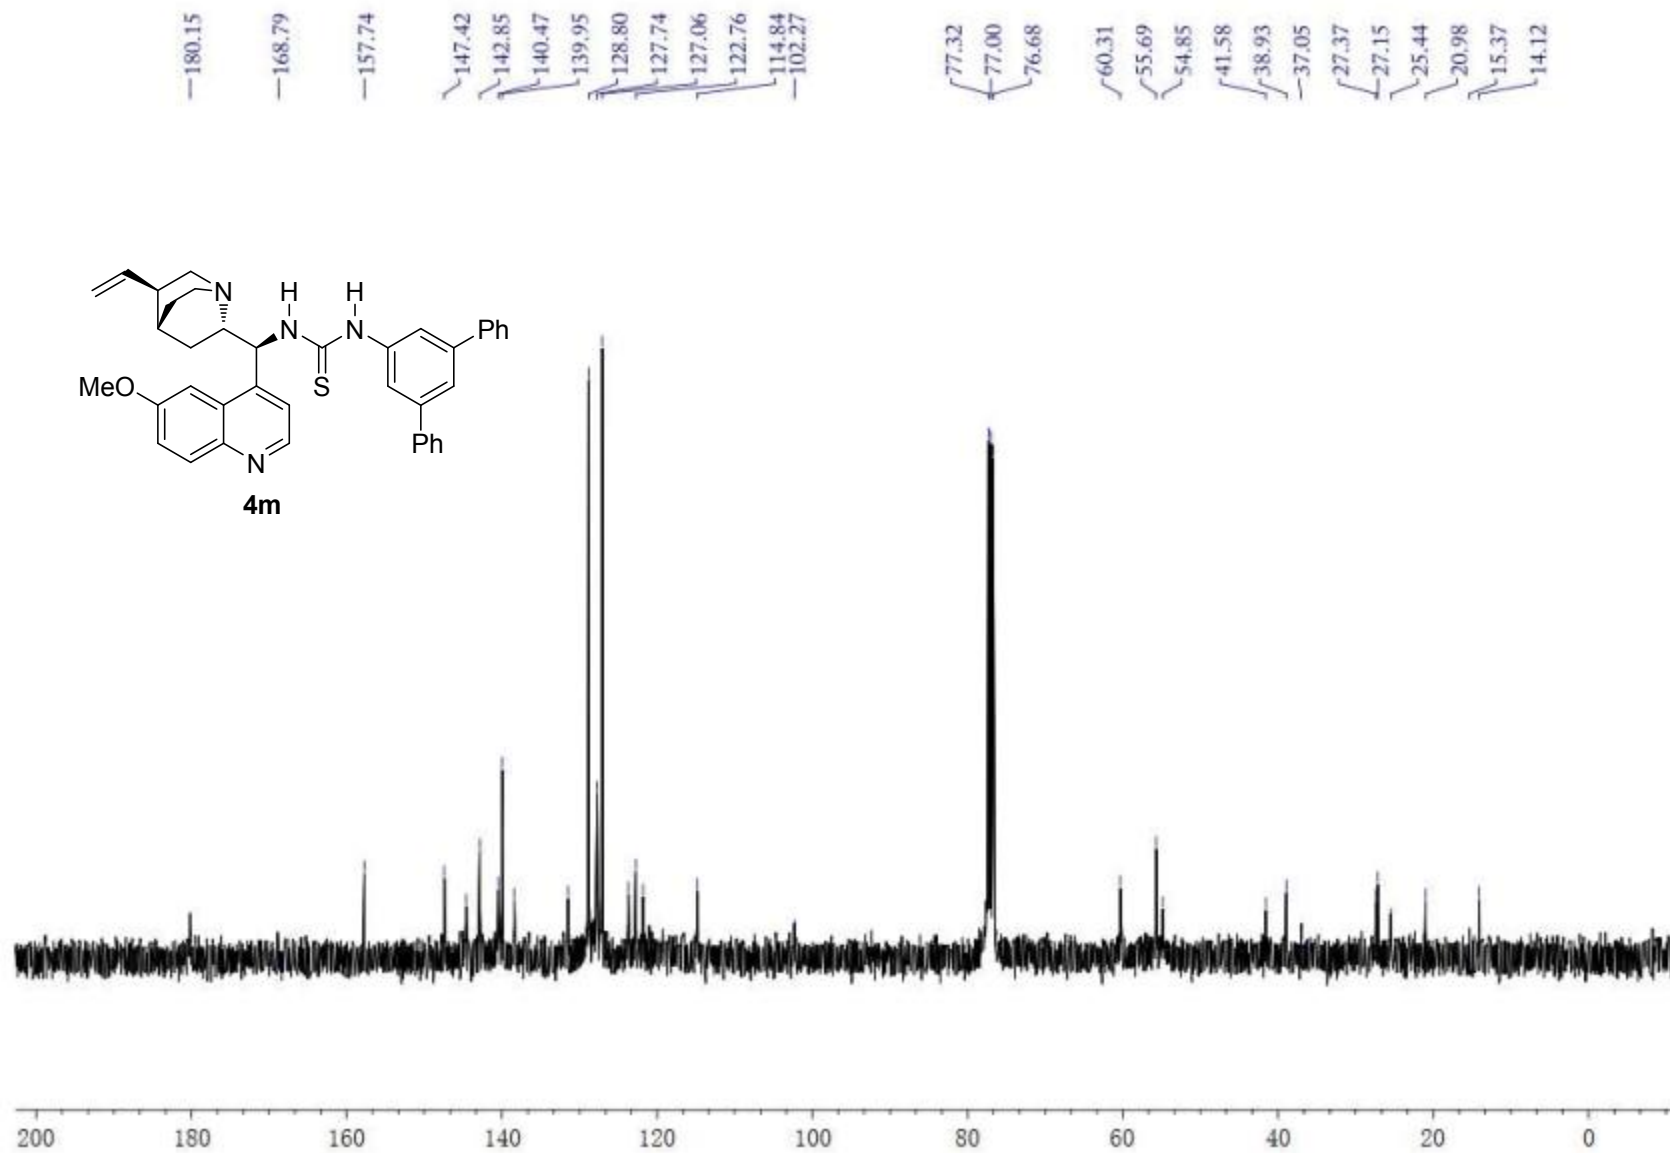

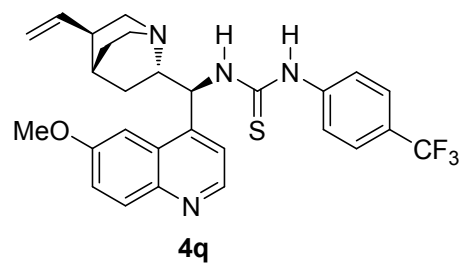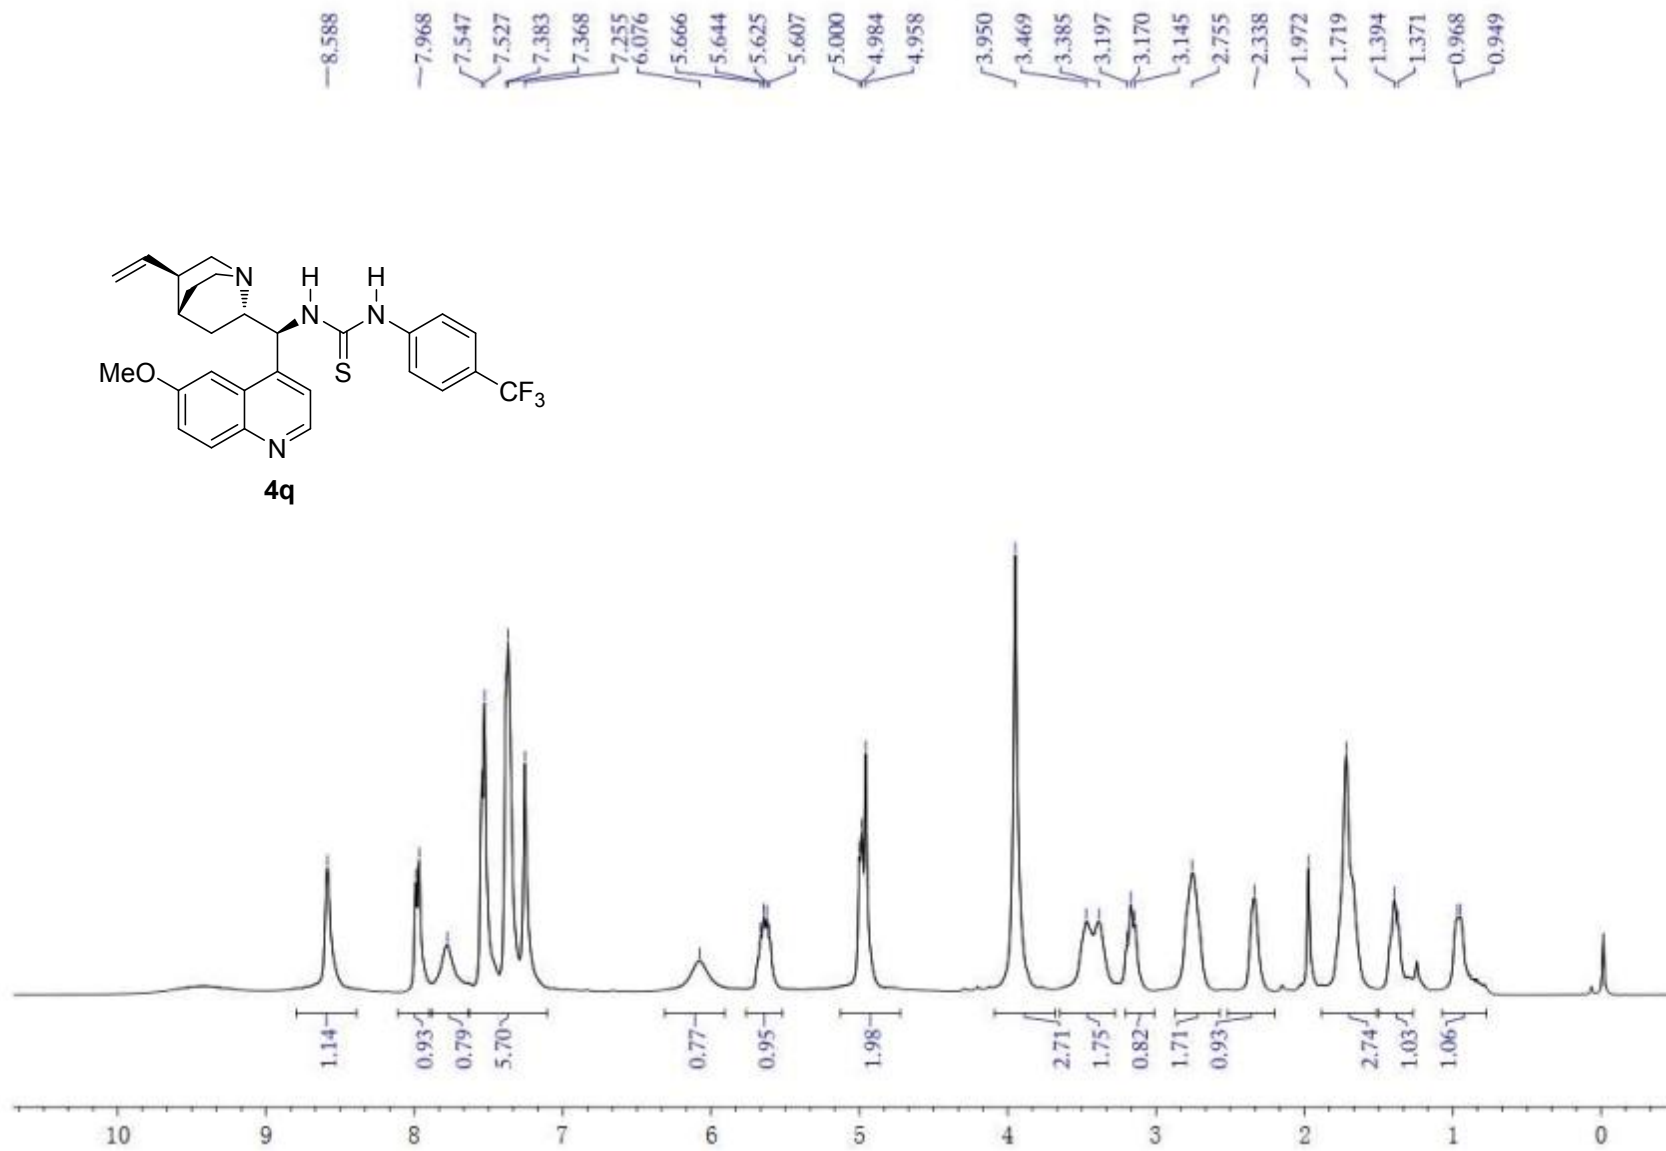



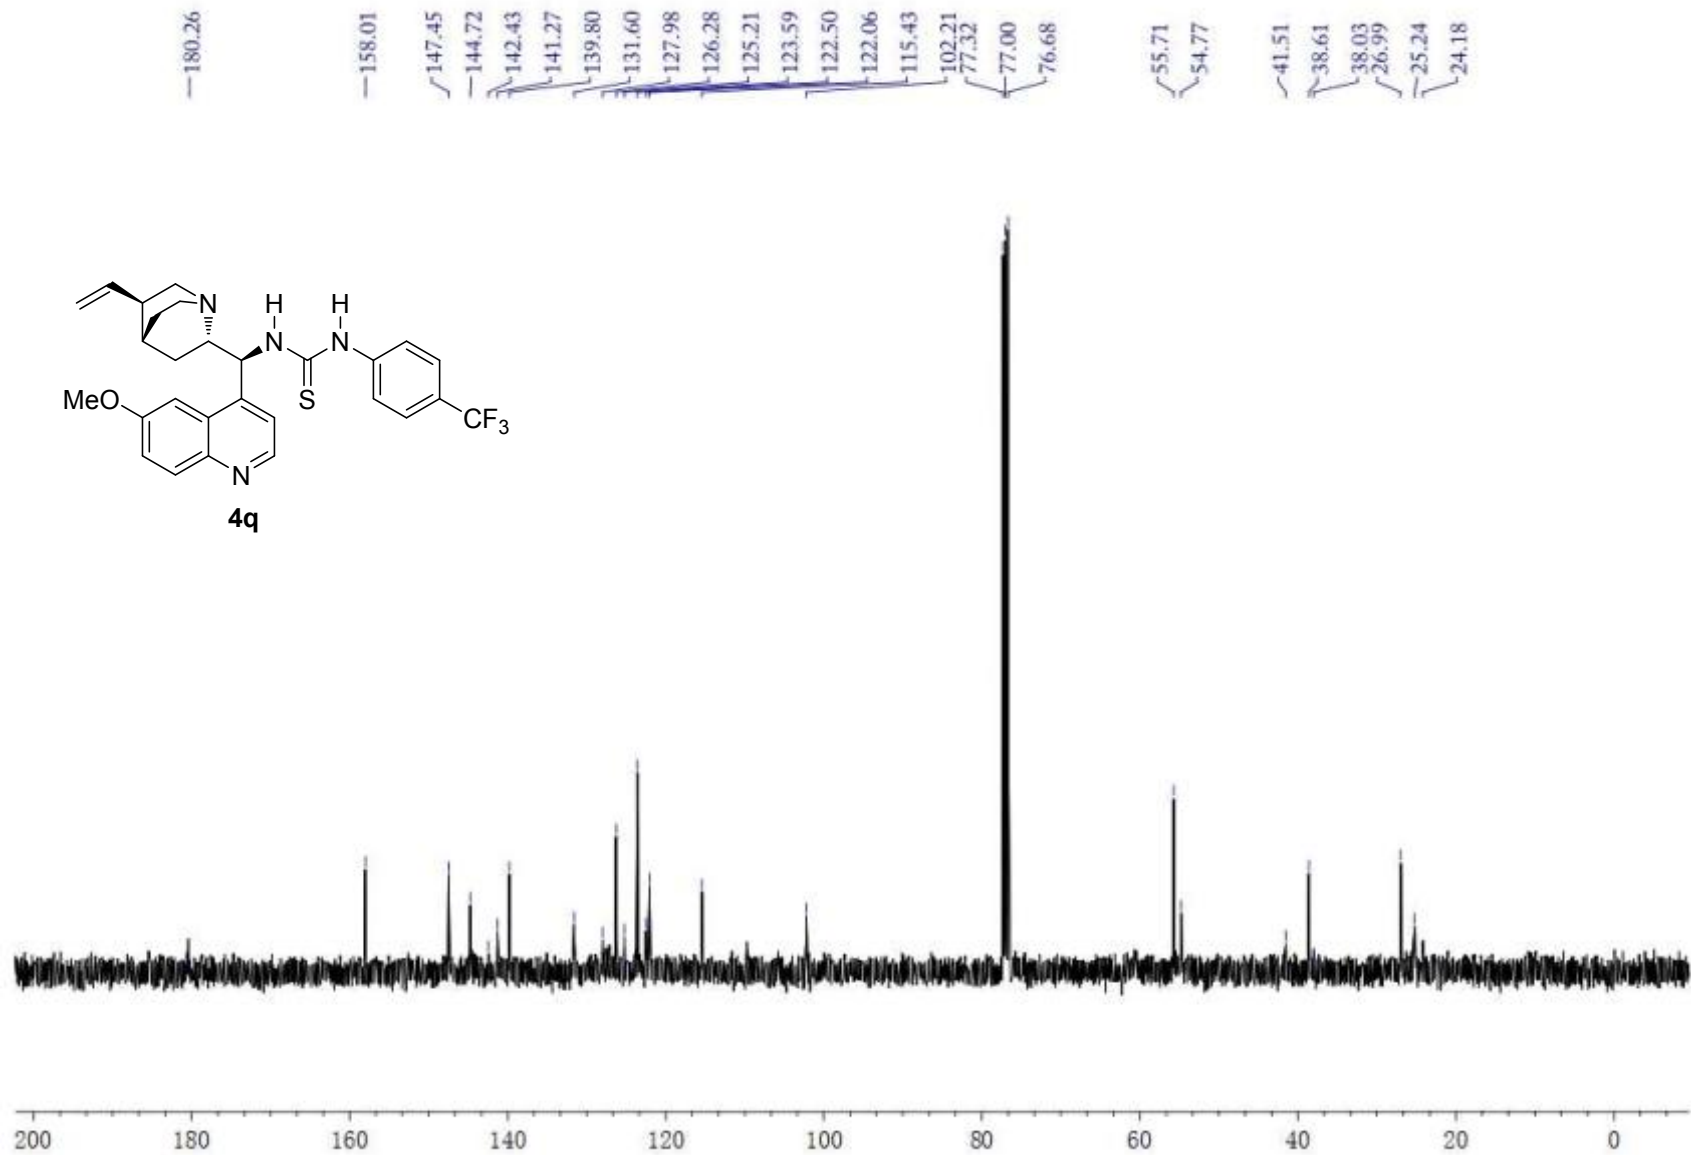

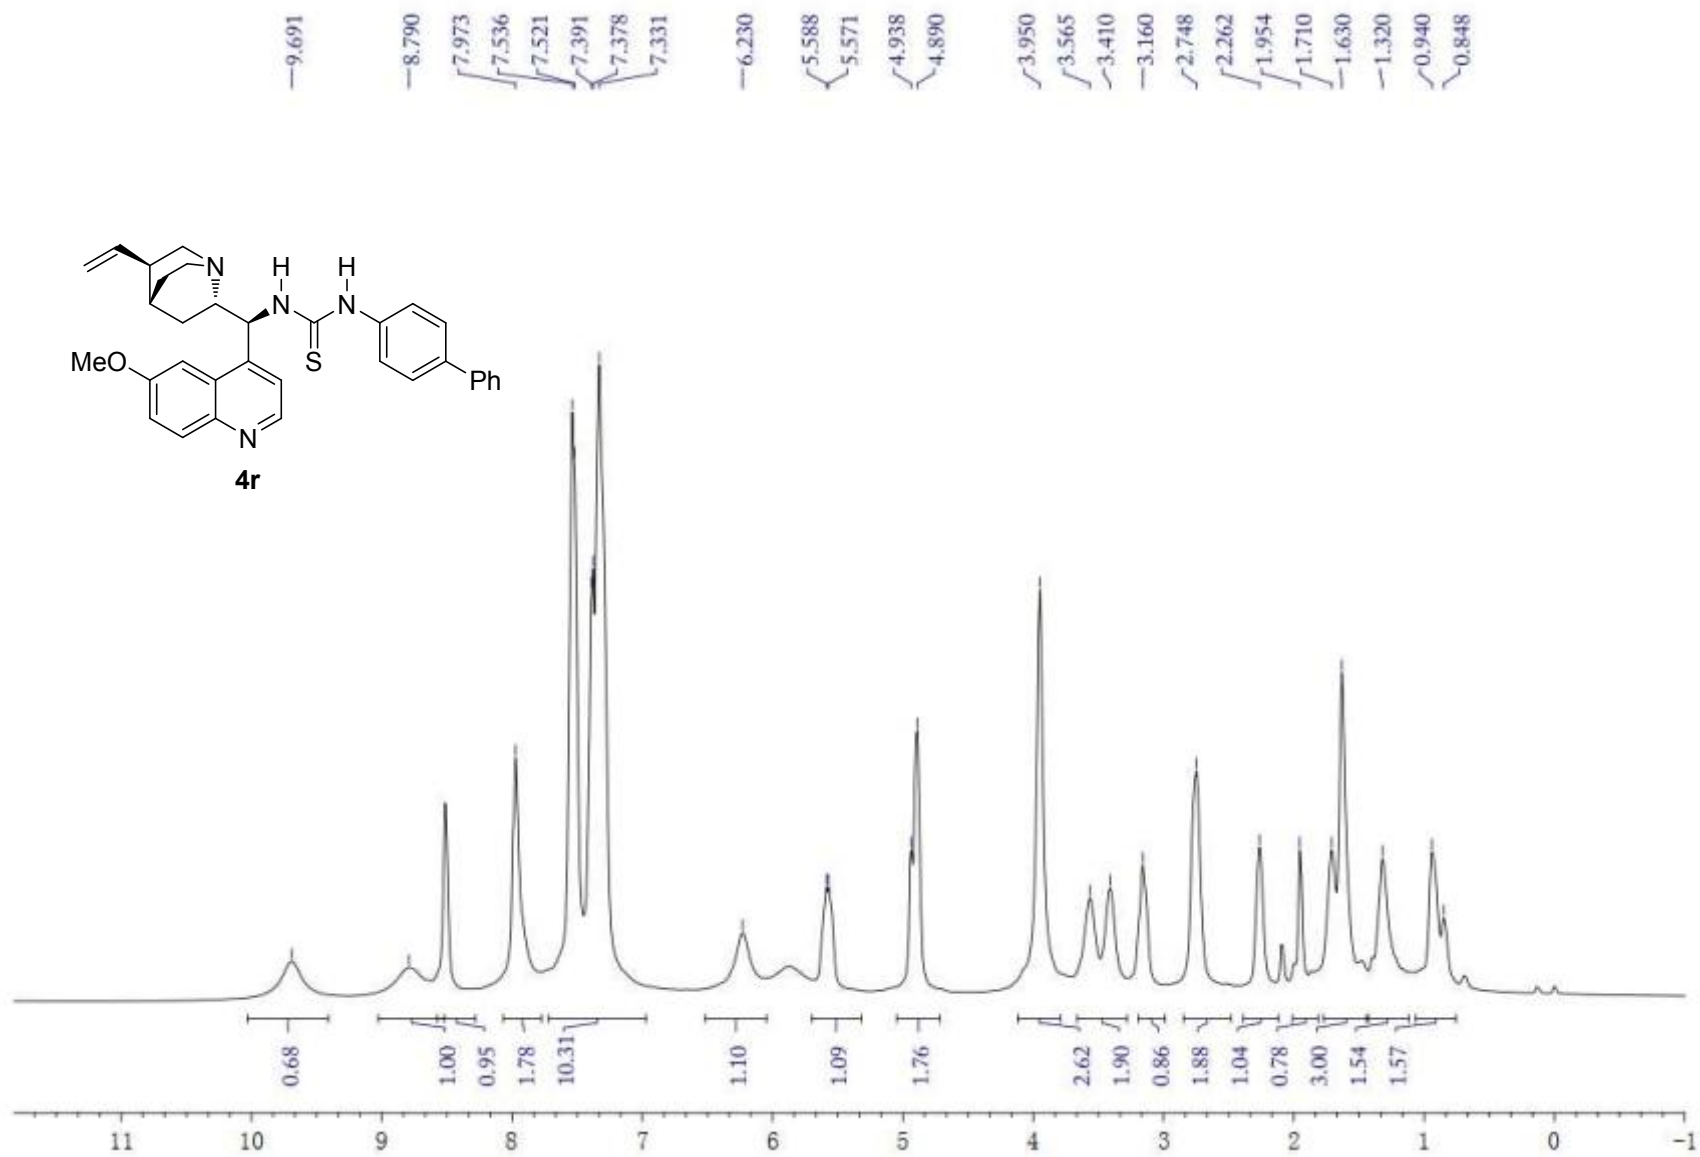

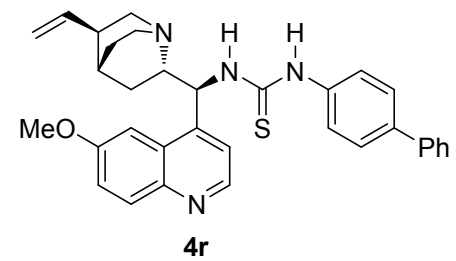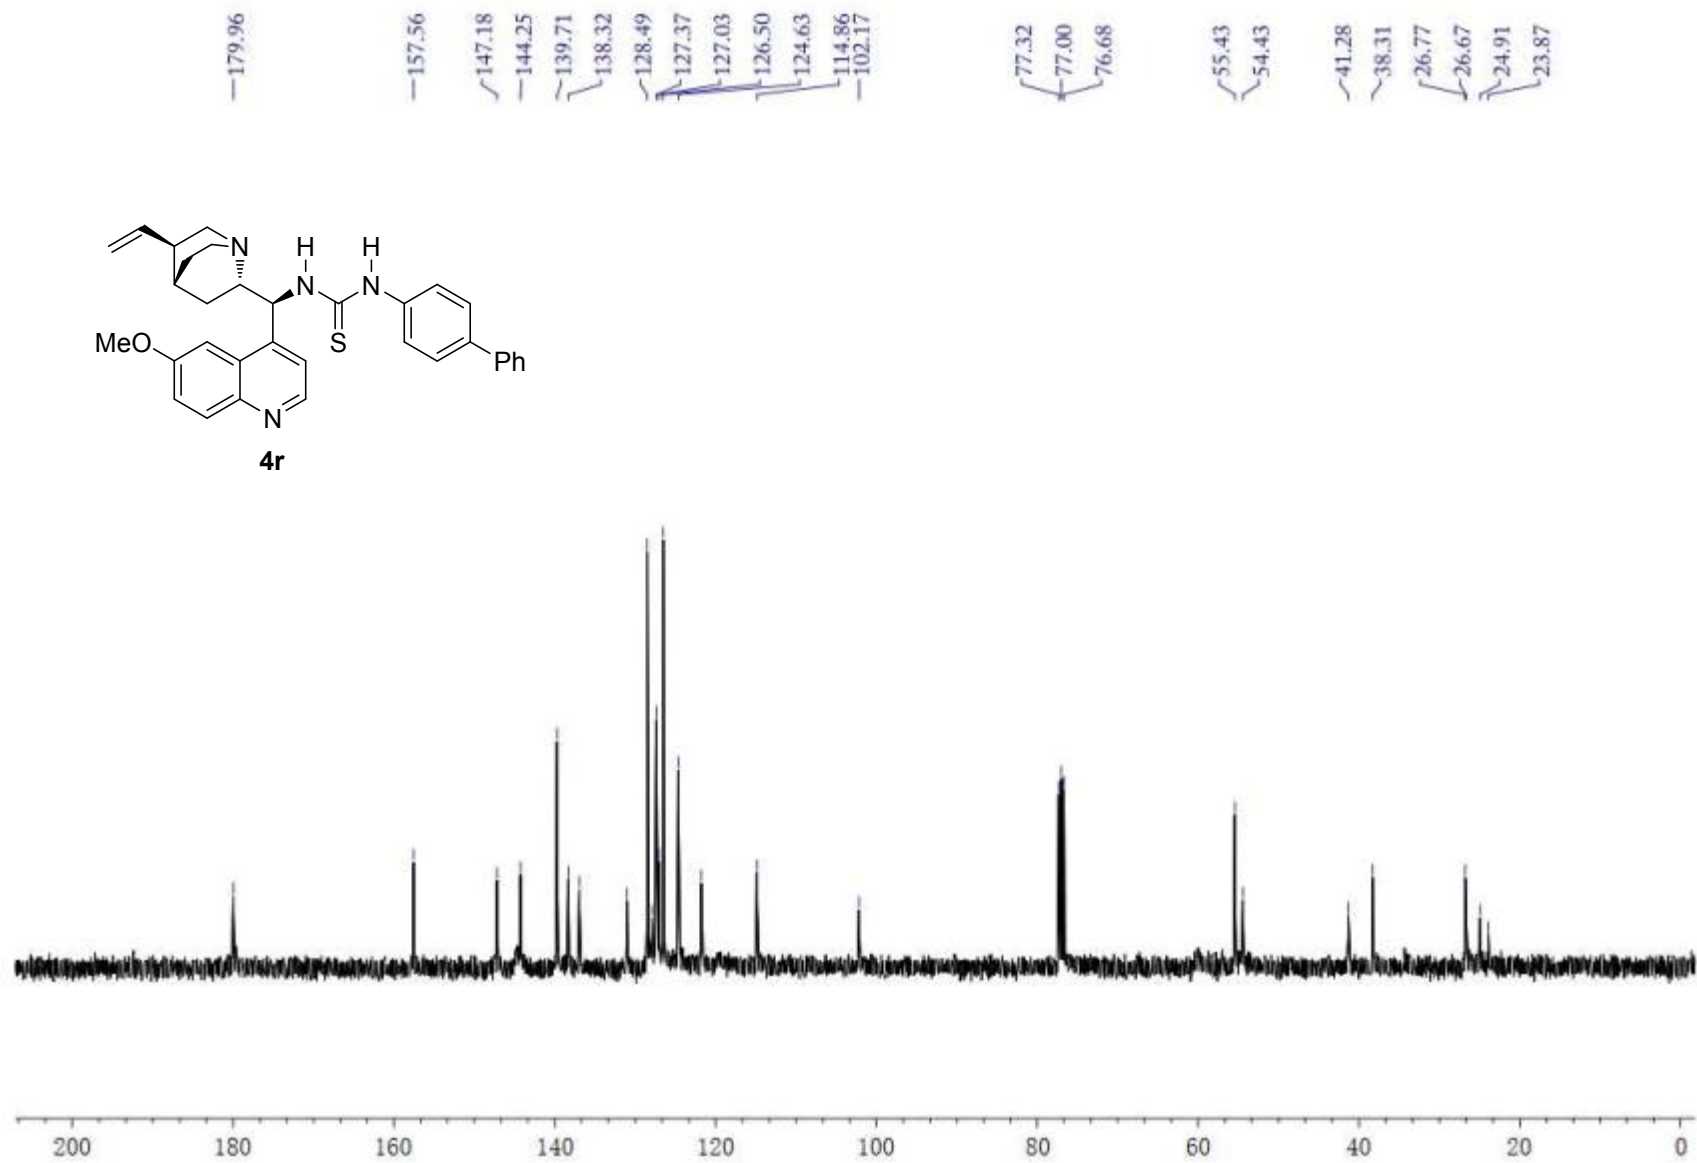

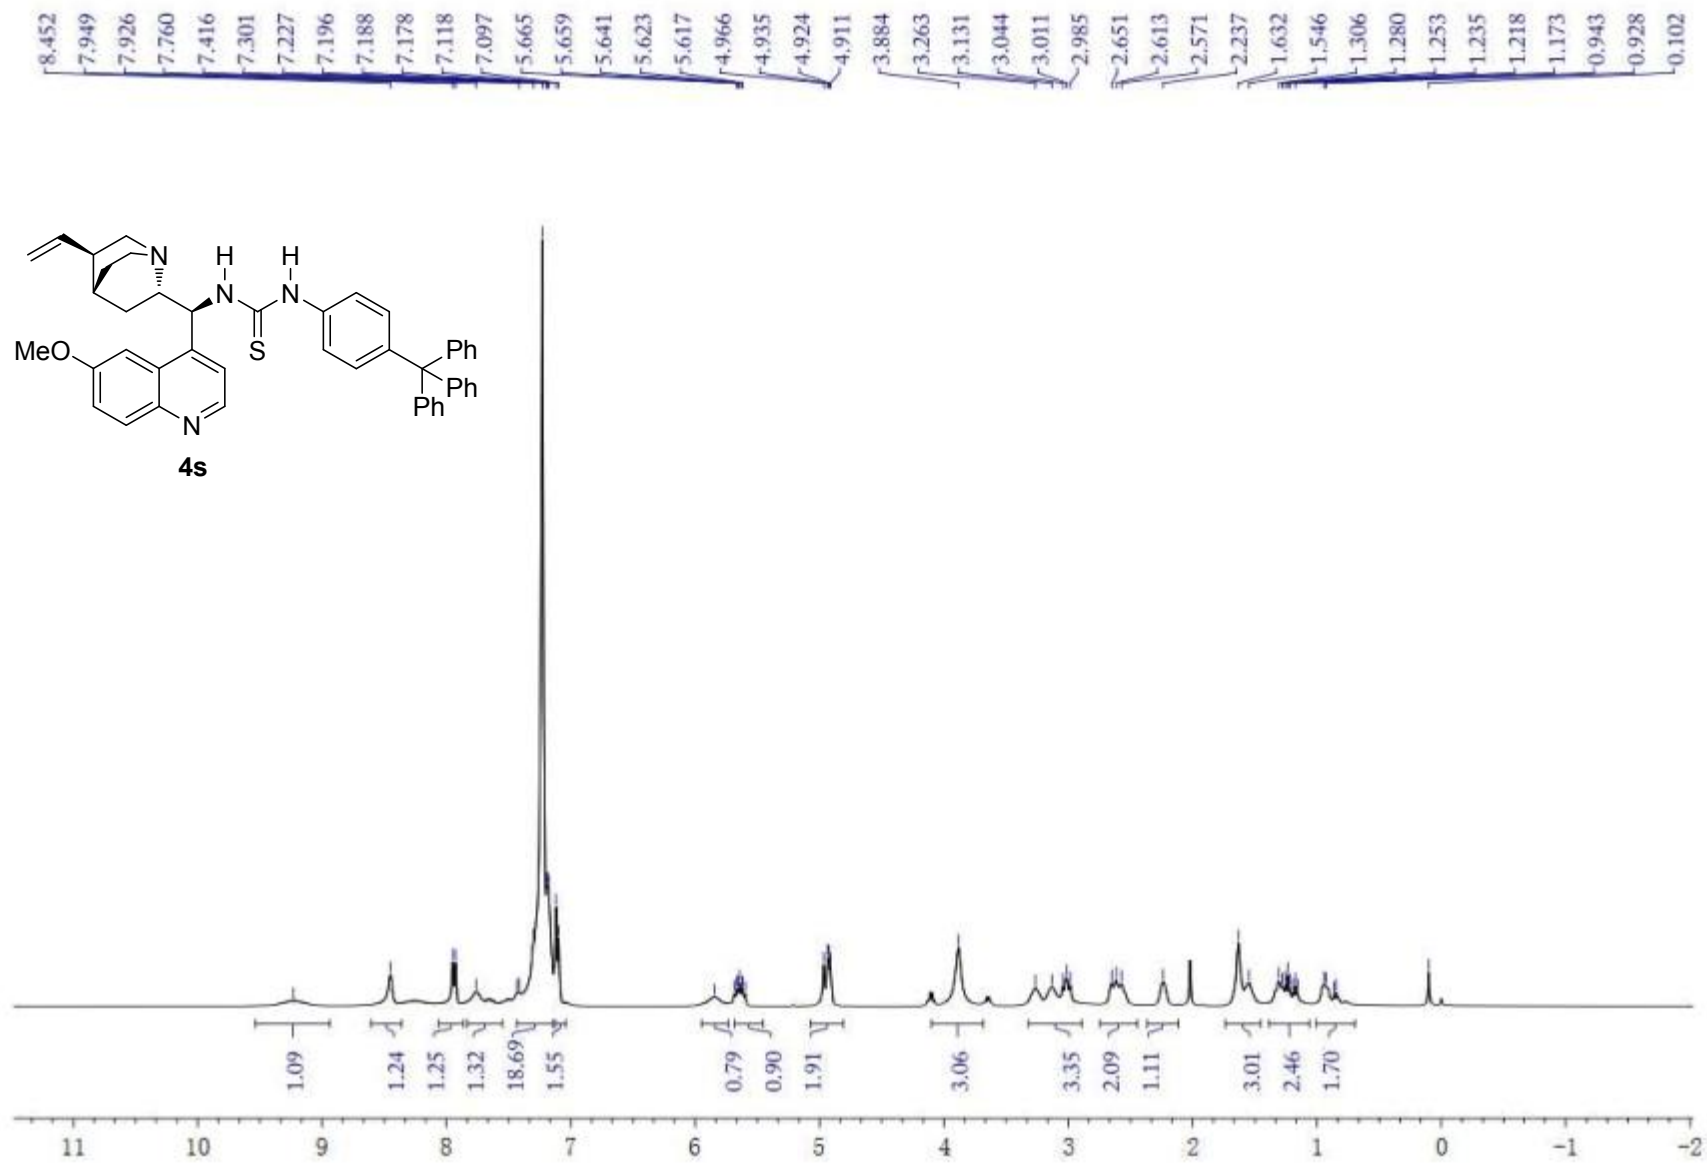

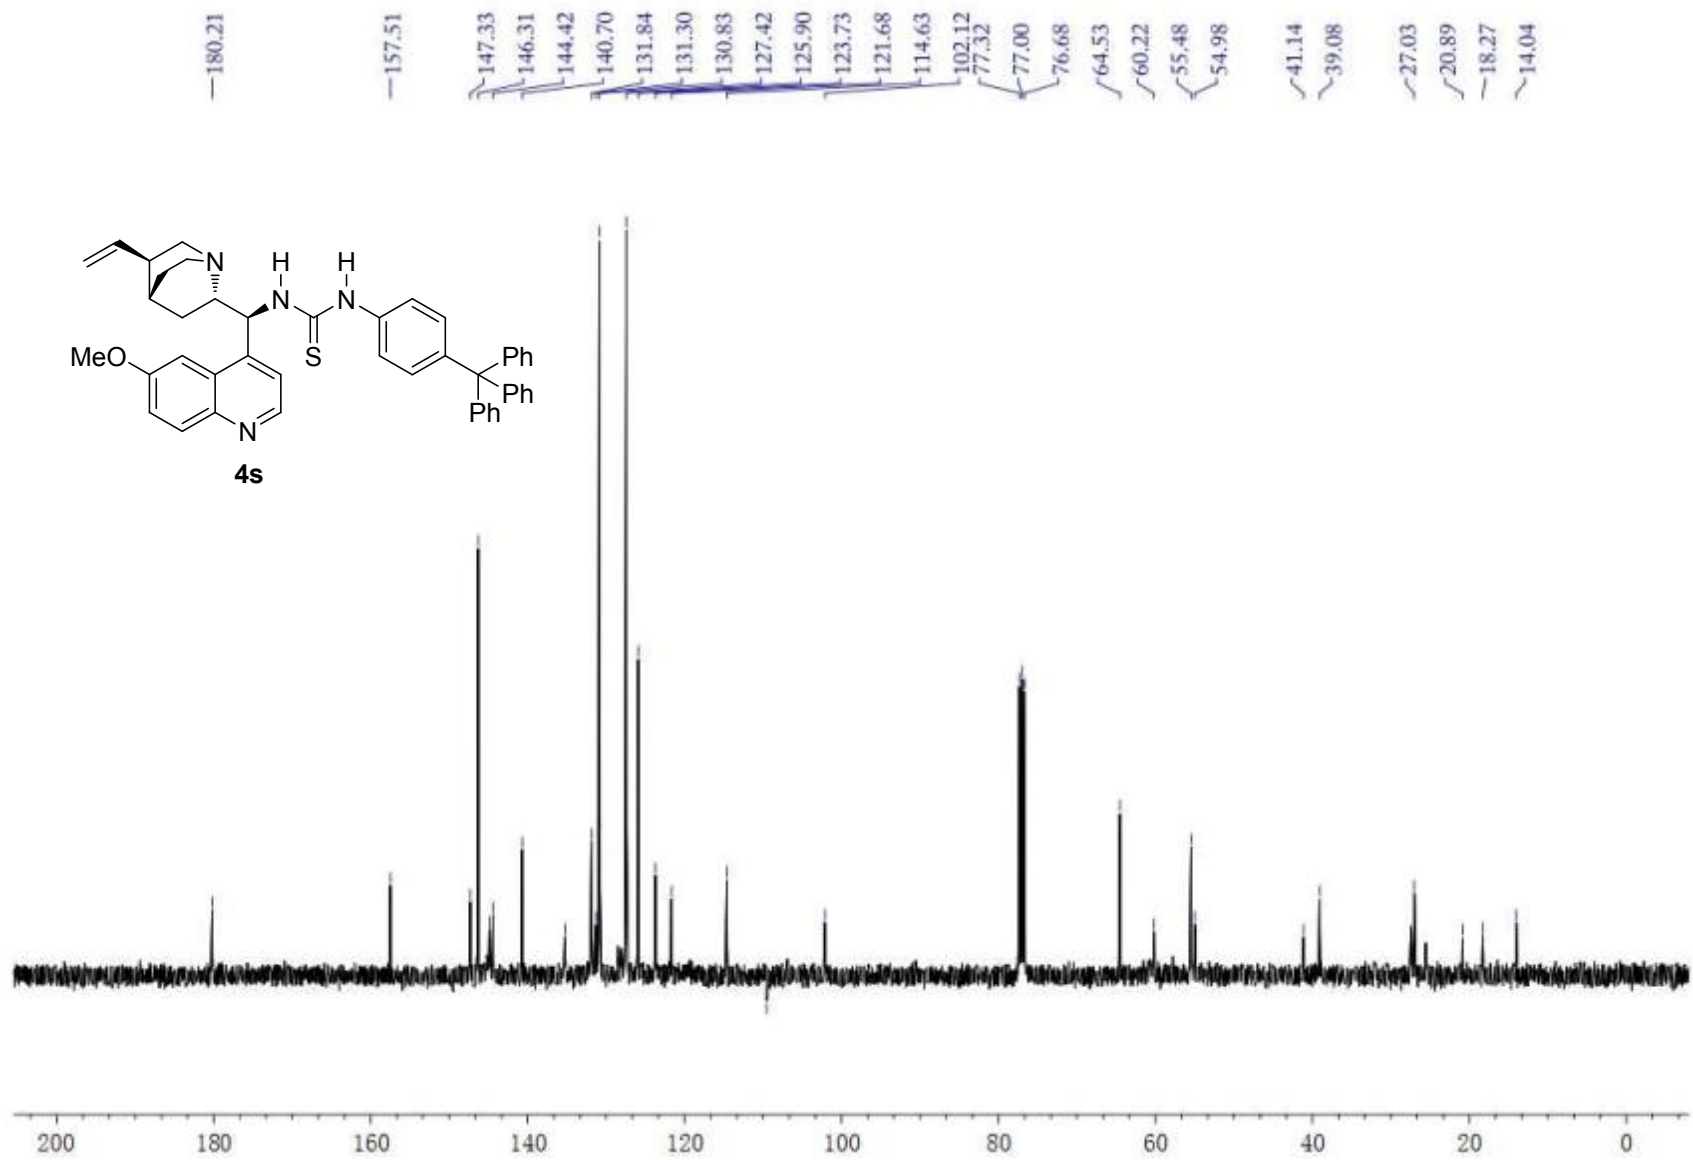

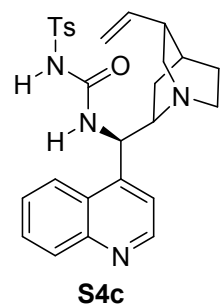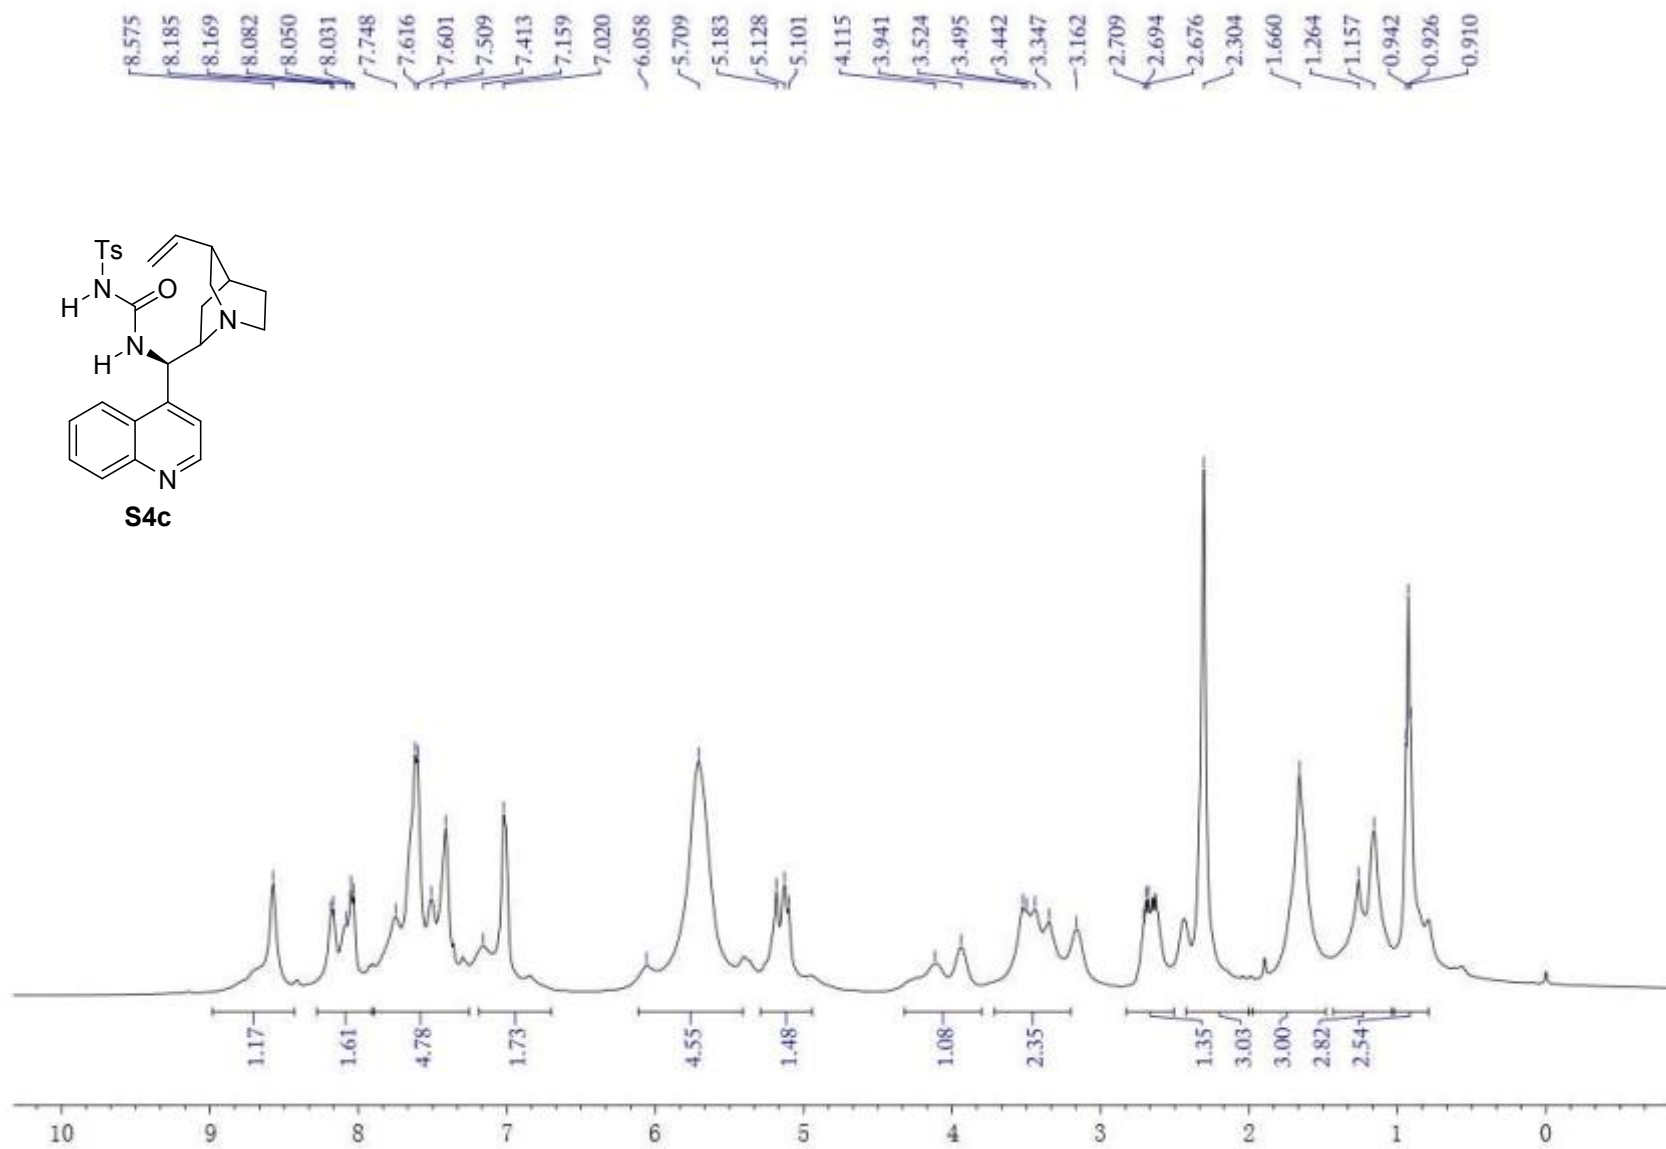

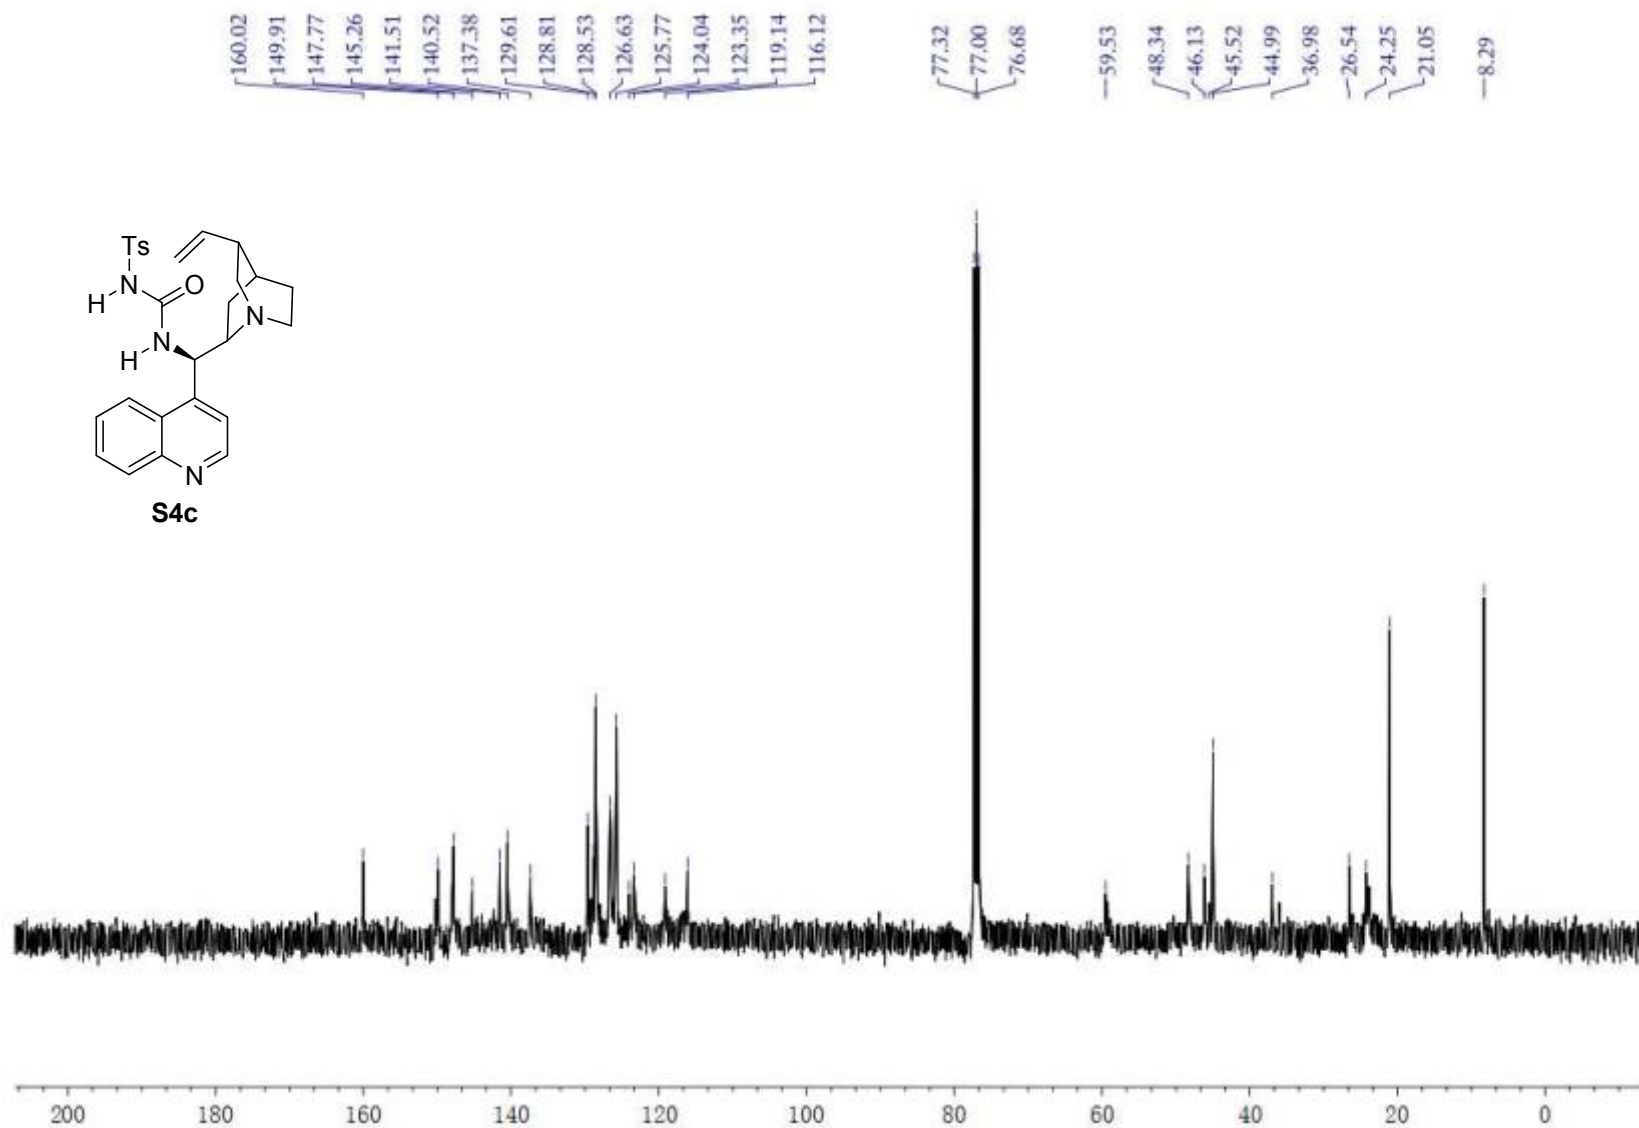

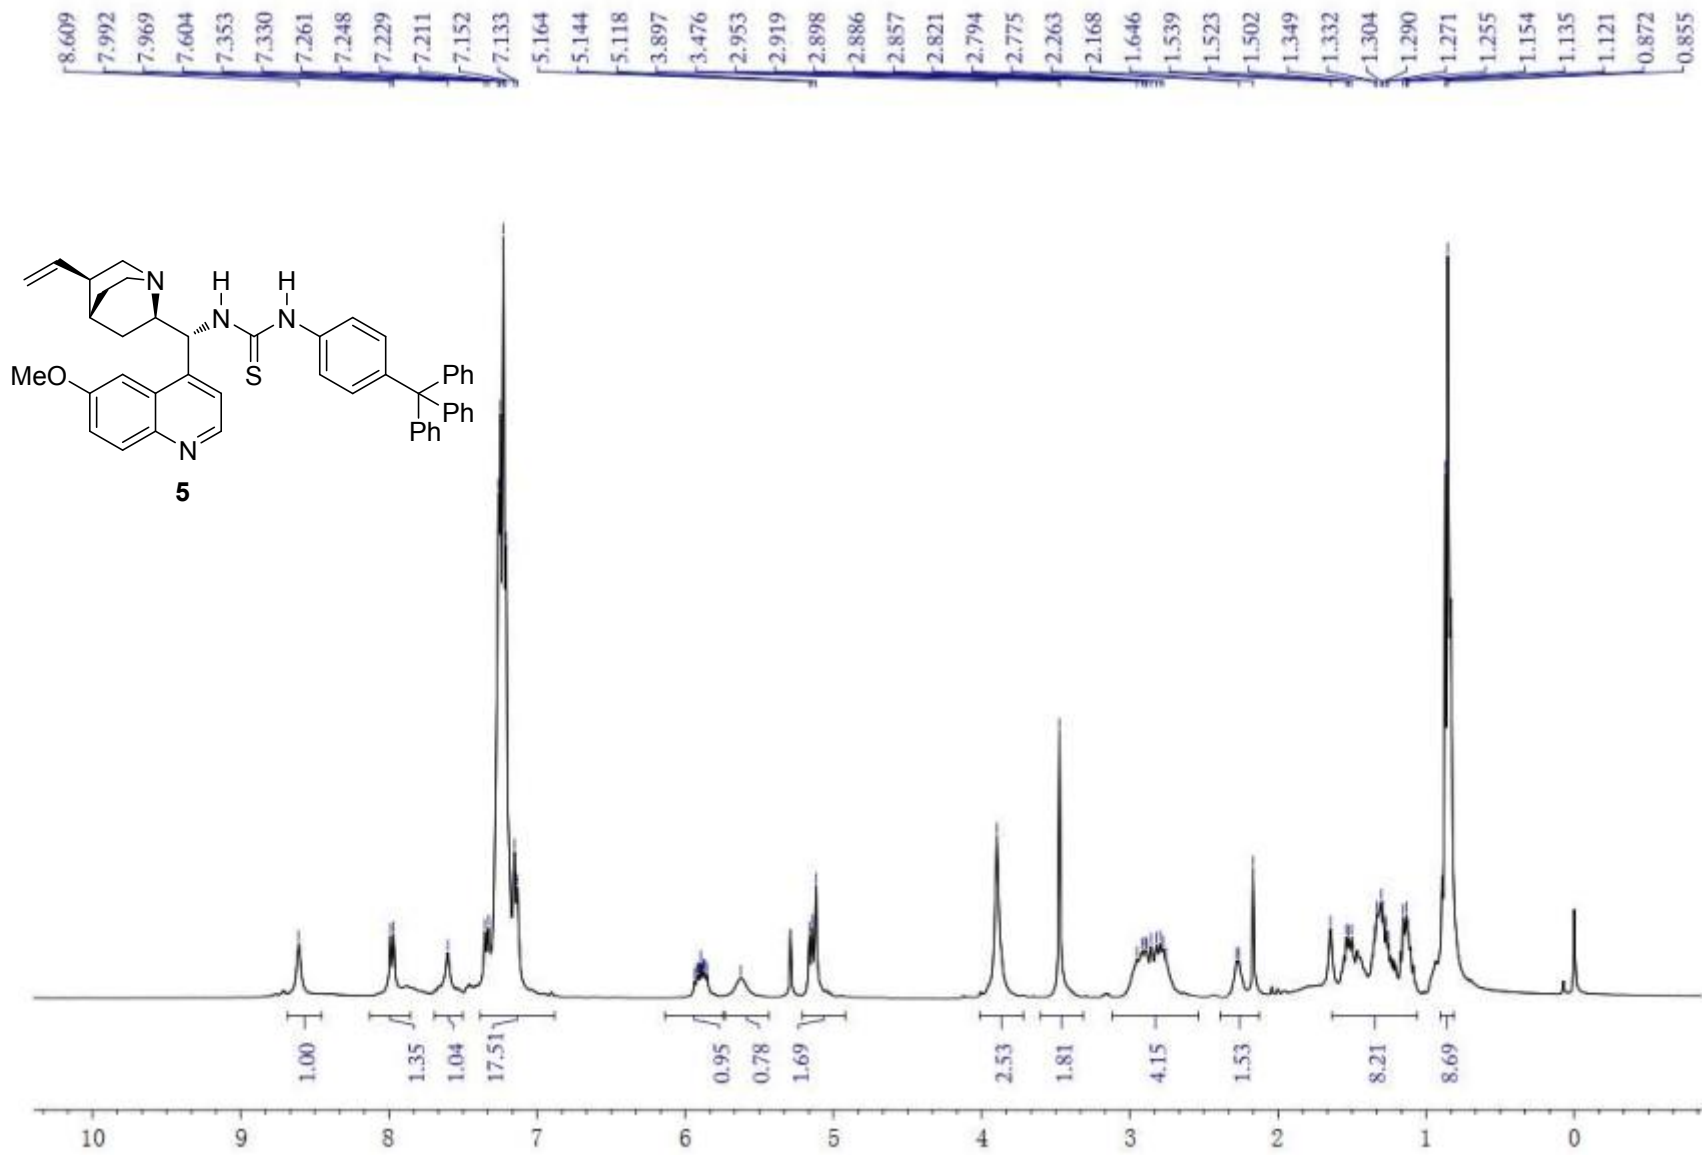



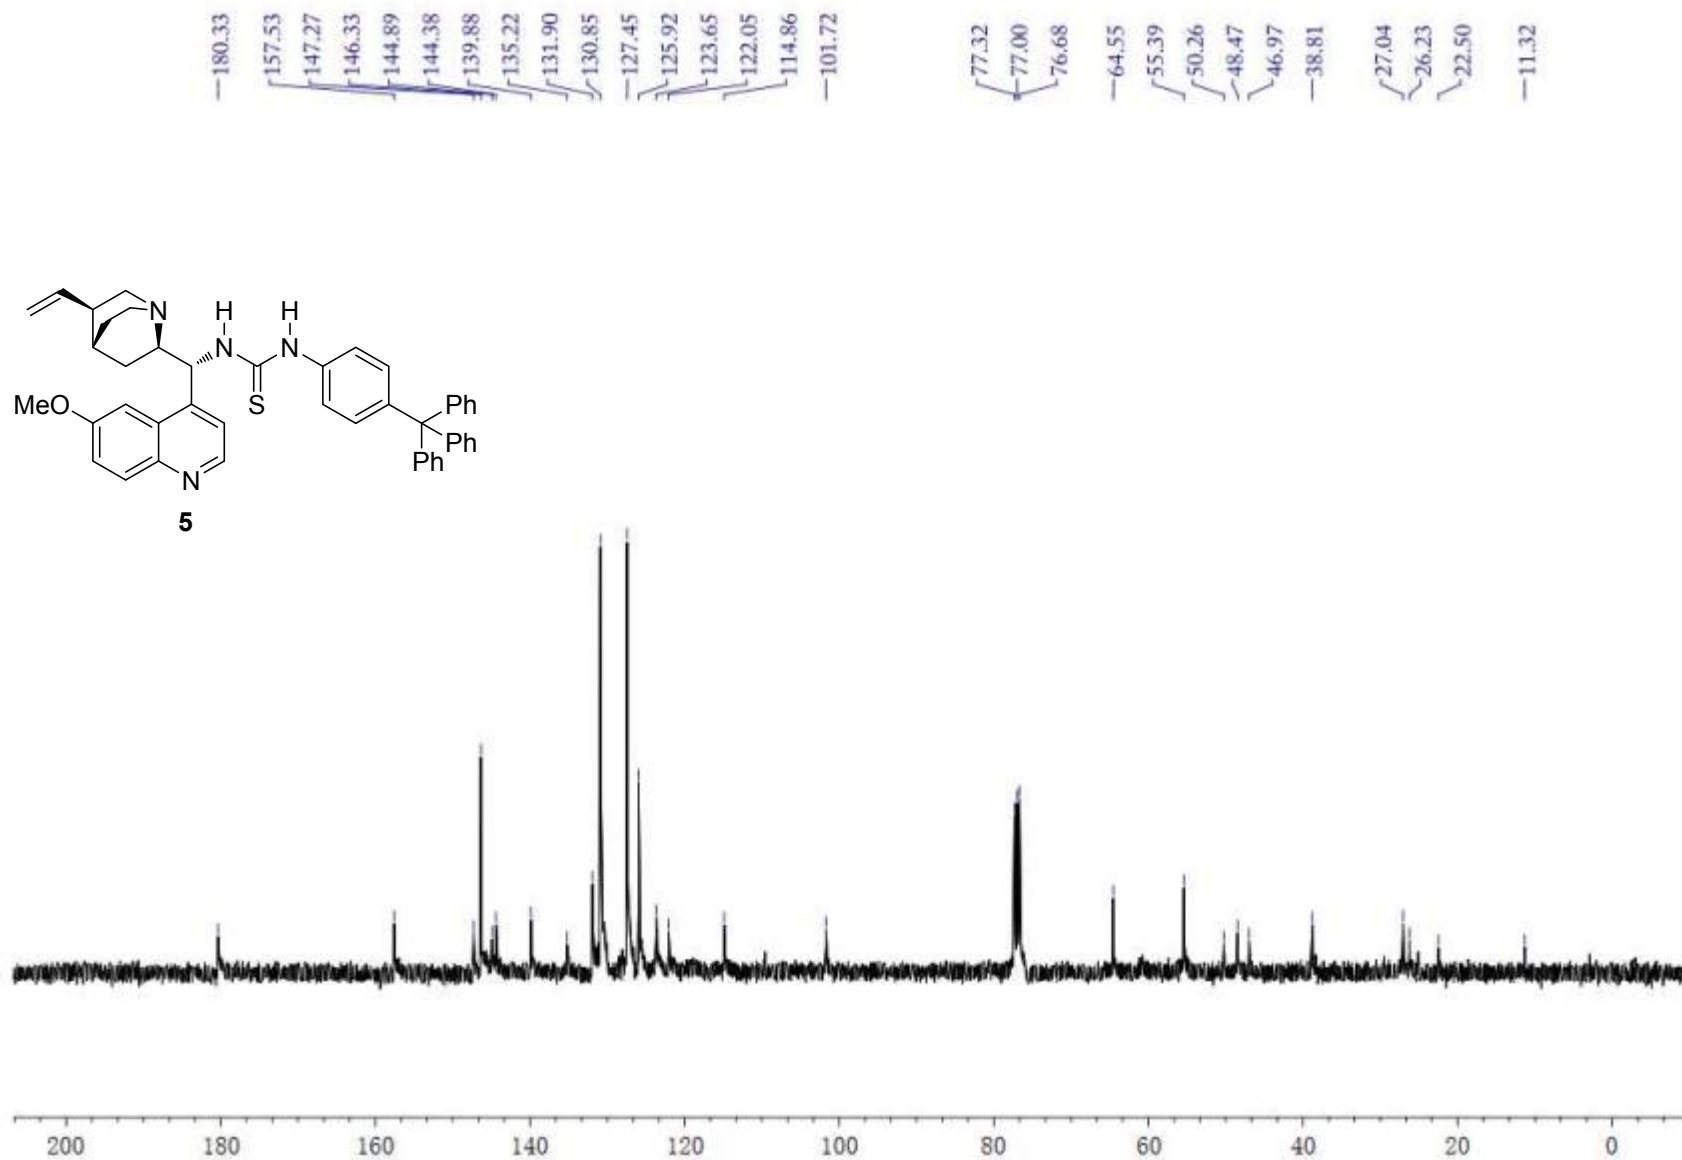

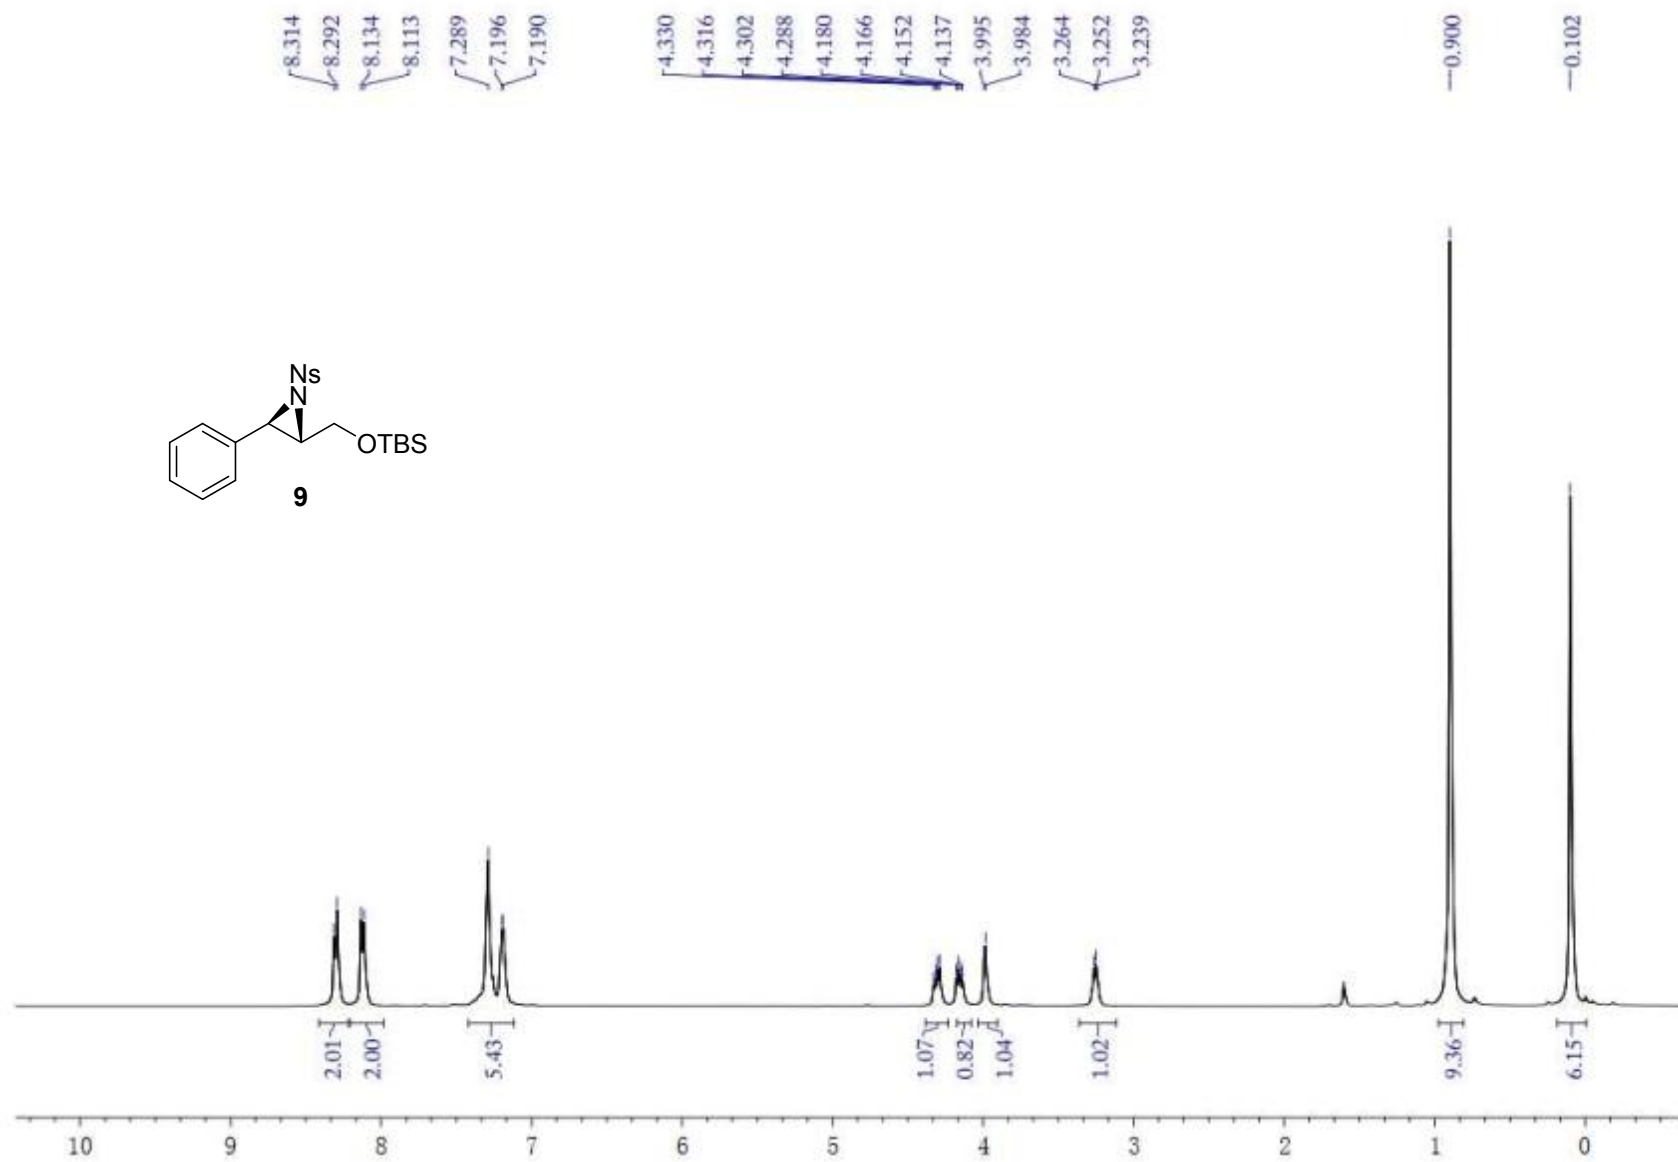

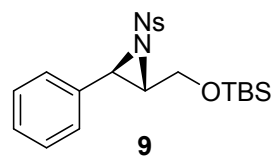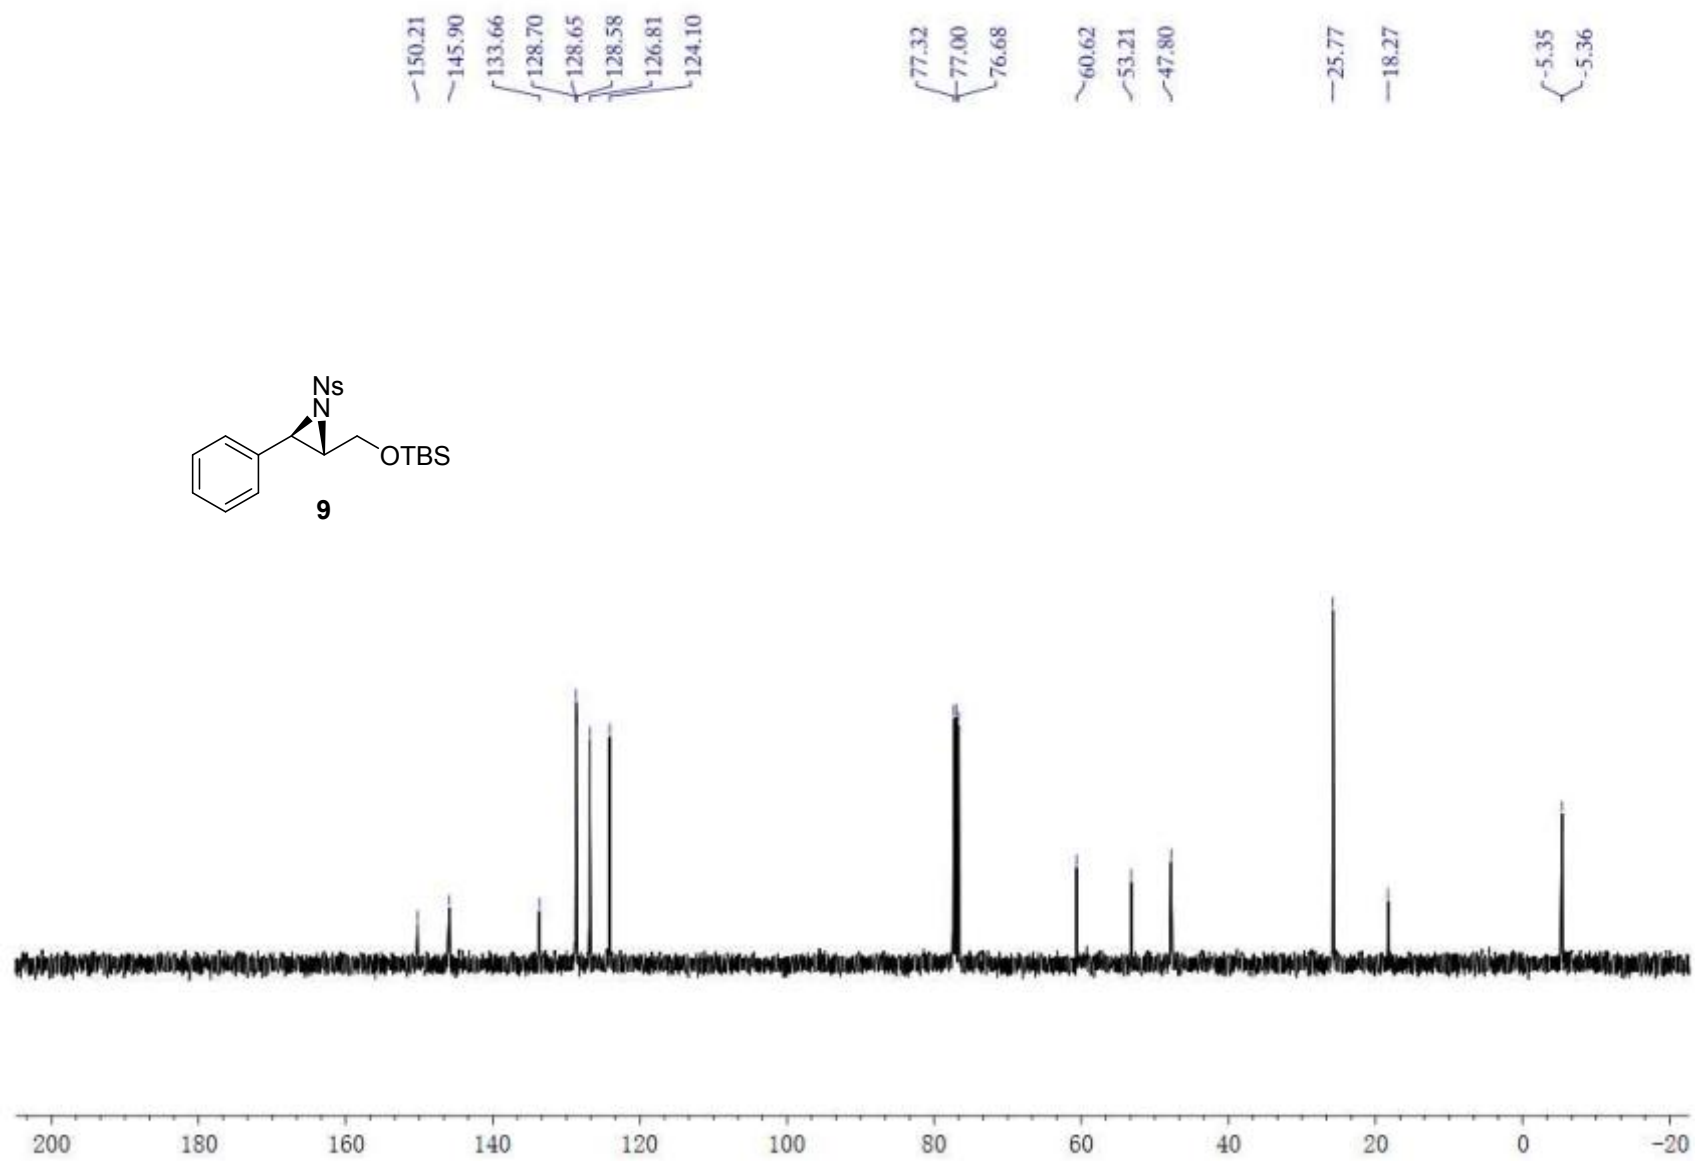

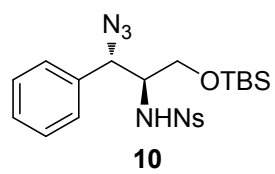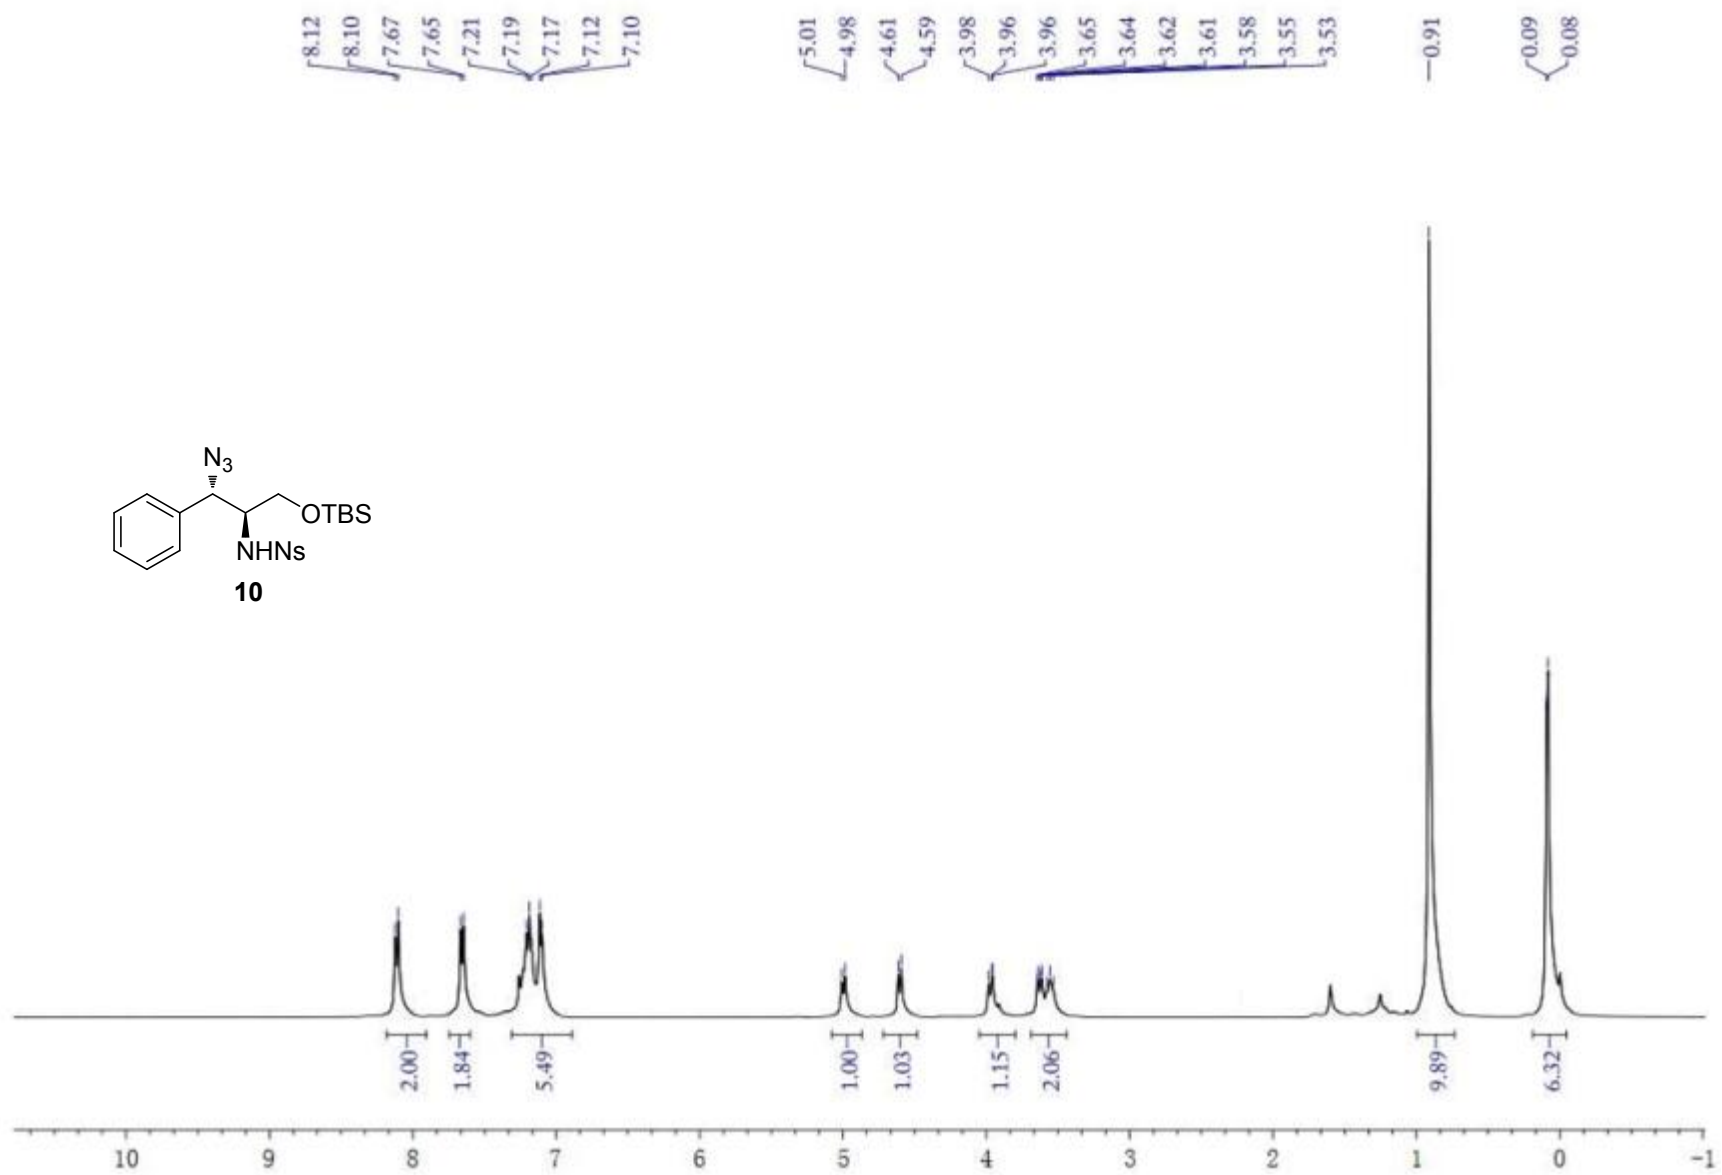

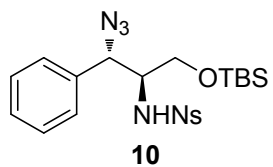

149.59  
145.92  
135.97  
128.75  
128.68  
127.93  
127.57  
123.97

77.32  
77.00  
76.68  
64.96  
61.96  
59.10

25.81  
18.25

-5.53  
-5.55

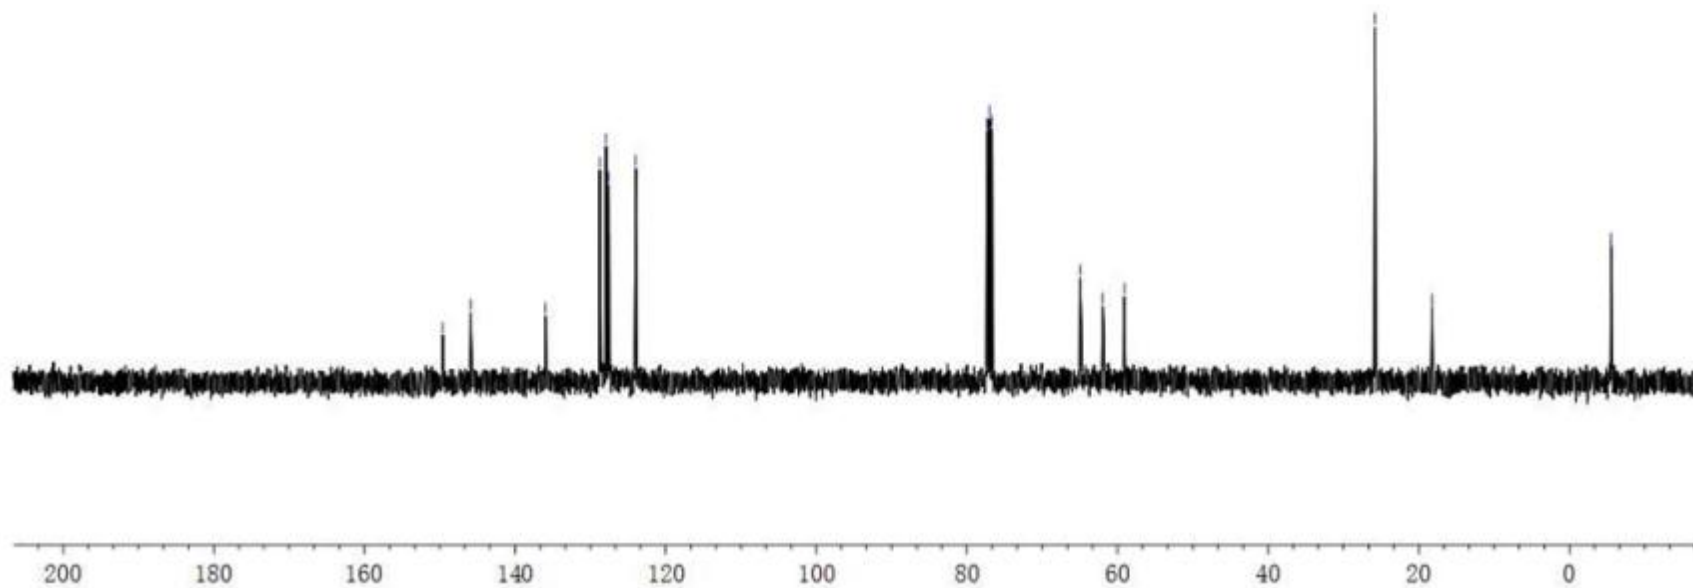

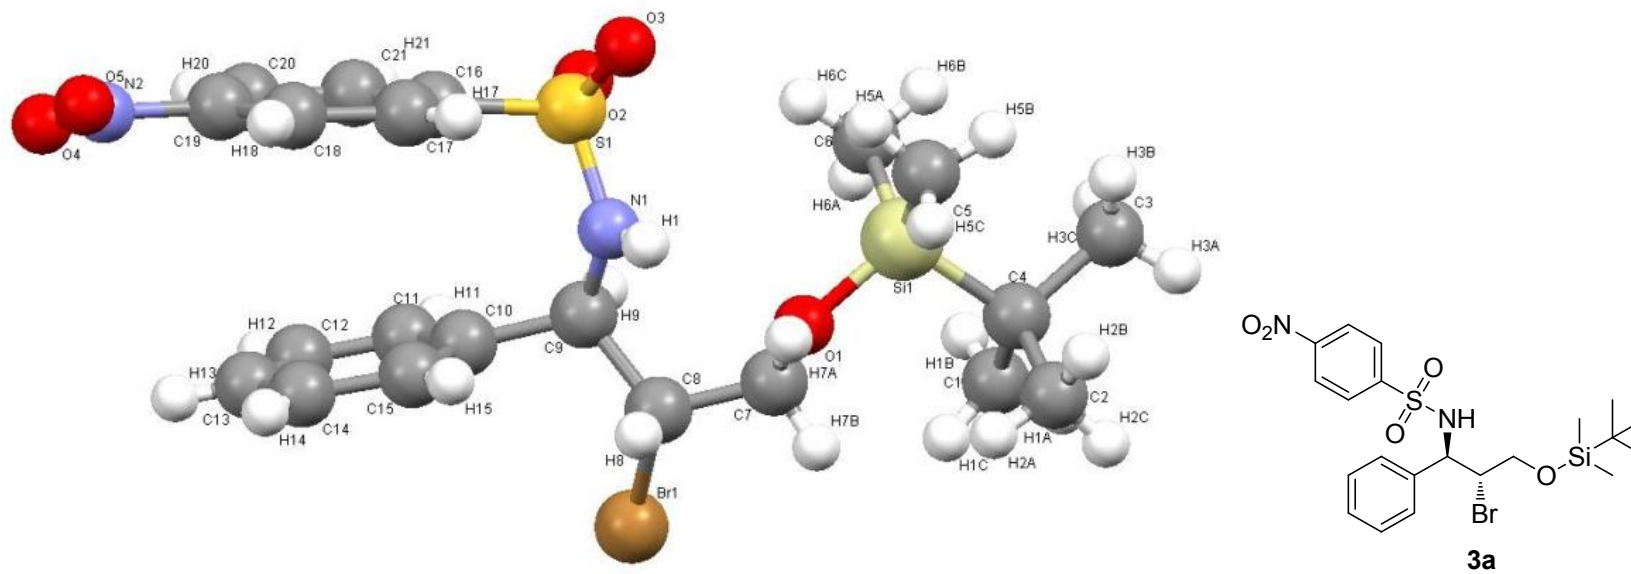

**Figure S1.** X-ray structure of **3a**.
